# Supplementary material for: Atrophin controls developmental signaling pathways via interactions with Trithorax-like
Source: eLife journal article supplement (doi:10.7554/elife.23084), 2017-03-22
Supplement: supp [file elife-23084-supp-v1.zip]

## Discovered Motif Sequence

## Distribution

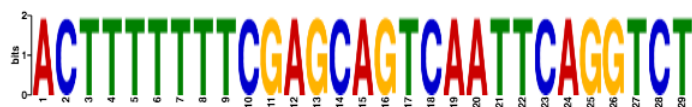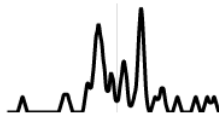

Novel motif  
E-value:  $8.4 \times 10^{-54}$

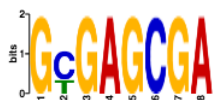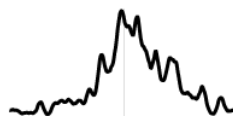

Novel motif  
E-value:  $5.0 \times 10^{-49}$

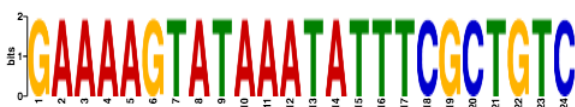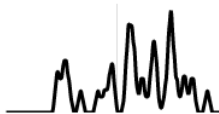

Motif of SIp1  
E-value:  $3.2 \times 10^{-46}$

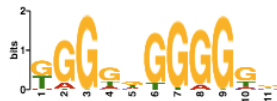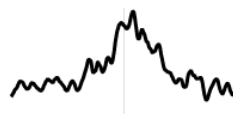

Motif of L(3)neo38  
E-value:  $3.8 \times 10^{-30}$

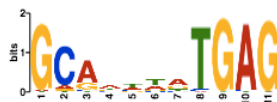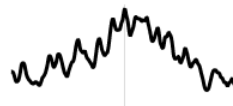

Motif of Her  
E-value:  $7.0 \times 10^{-23}$

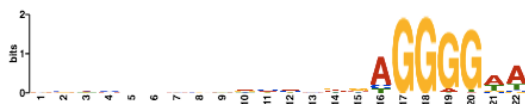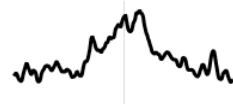

Motif of Pad  
E-value:  $1.1 \times 10^{-21}$
