# Supplementary material for: Atrophin controls developmental signaling pathways via interactions with Trithorax-like
Source: eLife journal article supplement (doi:10.7554/elife.23084), 2017-03-22

## A Comparison MACS2 derived $-\log(p\text{-value})$ of Atro peaks

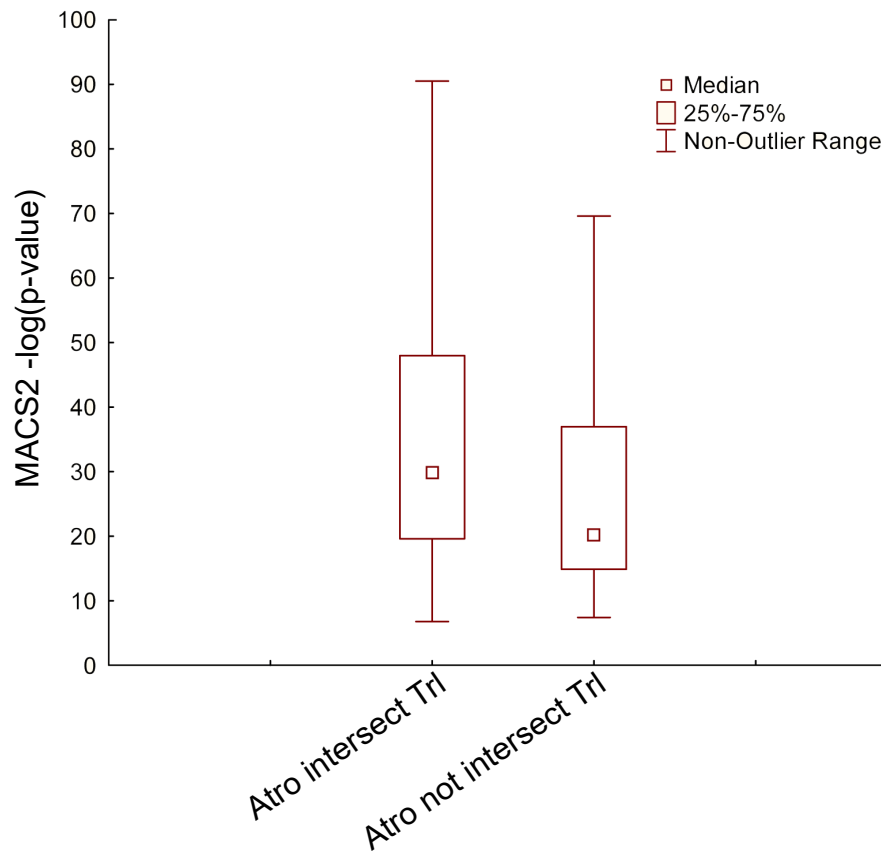

## B Comparison MACS2 derived fold enrichment of Atro peaks

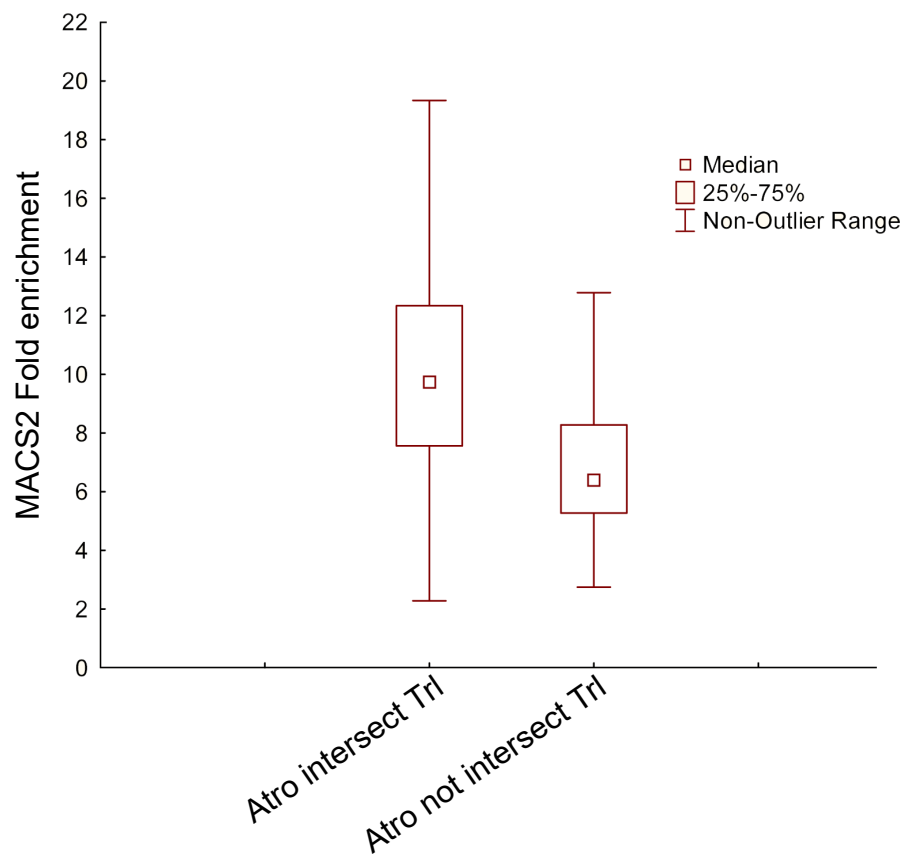

Supplement: supp [file elife-23084-supp-v1.zip]
