# Supplementary material for: Atrophin controls developmental signaling pathways via interactions with Trithorax-like
Source: eLife journal article supplement (doi:10.7554/elife.23084), 2017-03-22
Supplement: supp [file elife-23084-supp-v1.zip]

Archive with 20 entries (20 files):
- elife_poa_e23084_Figure_4_figure_supplement2.pdf
- elife_poa_e23084_Figure_3_figure_supplement_1.pdf
- elife_poa_e23084_Figure_1_Source_Data_1.xlsx
- elife_poa_e23084_Supplementary_File_2.xlsx
- elife_poa_e23084_Figure_4_figure_supplement3.pdf
- elife_poa_e23084_Figure_6_figure_supplement3.pdf
- elife_poa_e23084_Figure_1_figure_supplement1.pdf
- elife_poa_e23084_Figure_1_Source_Data_2.xlsx
- elife_poa_e23084_Supplementary_File_1.xlsx
- elife_poa_e23084_Figure_6_Source_Data_1.xlsx
- elife_poa_e23084_Source_Code_File_2.pl
- elife_poa_e23084_Figure_5_figure_supplement2.pdf
- elife_poa_e23084_Figure_5_Source_Data_1.xlsx
- elife_poa_e23084_Source_Code_File_3.pl
- elife_poa_e23084_Figure_6_figure_supplement2.pdf
- elife_poa_e23084_Figure_4_figure_supplement1.pdf
- elife_poa_e23084_Source_Code_File_1.pl
- elife_poa_e23084_Figure_5_figure_supplement1.pdf
- elife_poa_e23084_Figure_6_figure_supplement1.pdf
- elife_poa_e23084_Supplementary_File_3.docx
