# Supplementary material for: Atrophin controls developmental signaling pathways via interactions with Trithorax-like
Source: eLife journal article supplement (doi:10.7554/elife.23084), 2017-03-22
Supplement: supp [file elife-23084-supp-v1.zip › elife_poa_e23084_Figure_1_Source_Data_1.xlsx]

## Sheet: PANTHER_BioProcess_unique_FBGN.
Analysis Type:	PANTHER Overrepresentation Test (release 20160715)		annotation list:	GO biological process complete
Annotation Version and Release Date:	GO Ontology database Released 2016-09-24
Analyzed List:	upload_1 (Drosophila melanogaster)
Reference List:	Drosophila melanogaster (all genes in database)
Bonferroni correction:	TRUE
GO biological process complete	Drosophila melanogaster - REFLIST (14217)	upload_1 (1124)	upload_1 (expected)	upload_1 (over/under)	upload_1 (fold Enrichment)	upload_1 (P-value)	_-log2(Pvalue)
regulation of neuron projection development (GO:0010975)	97	22	7.67	+	2.87	0.0444	4.4933
cell maturation (GO:0048469)	158	30	12.49	+	2.4	0.0437	4.51622
positive regulation of apoptotic process (GO:0043065)	56	16	4.43	+	3.61	0.0426	4.553
cellular response to lipid (GO:0071396)	38	13	3	+	4.33	0.0424	4.55979
JNK cascade (GO:0007254)	27	11	2.13	+	5.15	0.0394	4.66566
homeostatic process (GO:0042592)	338	51	26.72	+	1.91	0.0392	4.673
negative regulation of cell proliferation (GO:0008285)	82	20	6.48	+	3.09	0.0387	4.69152
negative regulation of small GTPase mediated signal transduction (GO:0051058)	22	10	1.74	+	5.75	0.0382	4.71028
renal system development (GO:0072001)	75	19	5.93	+	3.2	0.0377	4.72929
urogenital system development (GO:0001655)	75	19	5.93	+	3.2	0.0377	4.72929
glutathione metabolic process (GO:0006749)	49	15	3.87	+	3.87	0.0355	4.81604
response to hormone (GO:0009725)	68	18	5.38	+	3.35	0.0355	4.81604
positive regulation of developmental process (GO:0051094)	205	36	16.21	+	2.22	0.0346	4.85308
anterior/posterior axis specification (GO:0009948)	132	27	10.44	+	2.59	0.0322	4.9568
cellular response to hormone stimulus (GO:0032870)	67	18	5.3	+	3.4	0.0293	5.09296
proteolysis (GO:0006508)	738	29	58.35	-	0.5	0.0293	5.09296
imaginal disc-derived wing margin morphogenesis (GO:0008587)	48	15	3.79	+	3.95	0.028	5.15843
stem cell fate determination (GO:0048867)	31	12	2.45	+	4.9	0.027	5.2109
regulation of cell projection organization (GO:0031344)	123	26	9.72	+	2.67	0.0267	5.22702
intracellular signal transduction (GO:0035556)	315	49	24.9	+	1.97	0.0266	5.23243
cellular modified amino acid metabolic process (GO:0006575)	60	17	4.74	+	3.58	0.0261	5.25981
negative regulation of Ras protein signal transduction (GO:0046580)	21	10	1.66	+	6.02	0.0257	5.28209
negative regulation of nervous system development (GO:0051961)	107	24	8.46	+	2.84	0.0224	5.48036
adult behavior (GO:0030534)	160	31	12.65	+	2.45	0.0217	5.52616
embryonic axis specification (GO:0000578)	129	27	10.2	+	2.65	0.0216	5.53282
cell recognition (GO:0008037)	106	24	8.38	+	2.86	0.0193	5.69526
cell division (GO:0051301)	241	41	19.05	+	2.15	0.0188	5.73312
single-organism organelle organization (GO:1902589)	680	88	53.76	+	1.64	0.0176	5.82828
embryonic heart tube development (GO:0035050)	20	10	1.58	+	6.32	0.0169	5.88683
striated muscle cell differentiation (GO:0051146)	98	23	7.75	+	2.97	0.0169	5.88683
positive regulation of multicellular organismal process (GO:0051240)	206	37	16.29	+	2.27	0.0163	5.93898
neuron recognition (GO:0008038)	104	24	8.22	+	2.92	0.0141	6.14816
negative regulation of cell fate commitment (GO:0010454)	24	11	1.9	+	5.8	0.0133	6.23243
eye-antennal disc development (GO:0035214)	63	18	4.98	+	3.61	0.0129	6.27649
regulation of intracellular signal transduction (GO:1902531)	297	48	23.48	+	2.04	0.0124	6.33352
response to oxidative stress (GO:0006979)	103	24	8.14	+	2.95	0.0121	6.36885
germ-line stem cell population maintenance (GO:0030718)	69	19	5.46	+	3.48	0.012	6.38082
lymph gland development (GO:0048542)	50	16	3.95	+	4.05	0.0107	6.54625
cell growth (GO:0016049)	88	22	6.96	+	3.16	0.0101	6.6295
response to abiotic stimulus (GO:0009628)	402	60	31.78	+	1.89	0.00982	6.67006
protein phosphorylation (GO:0006468)	277	46	21.9	+	2.1	0.00981	6.67153
locomotory behavior (GO:0007626)	209	38	16.52	+	2.3	0.00931	6.747
embryonic organ development (GO:0048568)	49	16	3.87	+	4.13	0.00836	6.90228
regulation of apoptotic process (GO:0042981)	159	32	12.57	+	2.55	0.00729	7.09987
regulation of cellular component biogenesis (GO:0044087)	248	43	19.61	+	2.19	0.00711	7.13593
hematopoietic or lymphoid organ development (GO:0048534)	86	22	6.8	+	3.24	0.00704	7.15021
immune system development (GO:0002520)	86	22	6.8	+	3.24	0.00704	7.15021
positive regulation of cell proliferation (GO:0008284)	54	17	4.27	+	3.98	0.00673	7.21518
negative regulation of intracellular signal transduction (GO:1902532)	79	21	6.25	+	3.36	0.0066	7.24332
cellular response to endogenous stimulus (GO:0071495)	113	26	8.93	+	2.91	0.00614	7.34755
axis specification (GO:0009798)	189	36	14.94	+	2.41	0.00609	7.35934
cell proliferation (GO:0008283)	181	35	14.31	+	2.45	0.00606	7.36647
negative regulation of cell fate specification (GO:0009996)	22	11	1.74	+	6.32	0.0059	7.40507
enzyme linked receptor protein signaling pathway (GO:0007167)	157	32	12.41	+	2.58	0.00563	7.47265
developmental maturation (GO:0021700)	196	37	15.5	+	2.39	0.00542	7.52749
inter-male aggressive behavior (GO:0002121)	59	18	4.66	+	3.86	0.00531	7.55707
neuroblast fate commitment (GO:0014017)	31	13	2.45	+	5.3	0.00497	7.65254
formation of animal organ boundary (GO:0010160)	36	14	2.85	+	4.92	0.00481	7.69975
positive regulation of cell death (GO:0010942)	83	22	6.56	+	3.35	0.00402	7.95859
long-term memory (GO:0007616)	70	20	5.53	+	3.61	0.00393	7.99125
negative regulation of cell development (GO:0010721)	76	21	6.01	+	3.5	0.00365	8.09789
gliogenesis (GO:0042063)	76	21	6.01	+	3.5	0.00365	8.09789
regulation of response to stress (GO:0080134)	241	43	19.05	+	2.26	0.00349	8.16256
stem cell fate commitment (GO:0048865)	40	15	3.16	+	4.74	0.00324	8.26979
autophagic cell death (GO:0048102)	88	23	6.96	+	3.31	0.00296	8.40019
salivary gland cell autophagic cell death (GO:0035071)	88	23	6.96	+	3.31	0.00296	8.40019
animal organ formation (GO:0048645)	45	16	3.56	+	4.5	0.00286	8.44977
anatomical structure regression (GO:0060033)	115	27	9.09	+	2.97	0.00273	8.51688
RNA biosynthetic process (GO:0032774)	198	38	15.65	+	2.43	0.0027	8.53282
response to lipid (GO:0033993)	56	18	4.43	+	4.07	0.00258	8.59841
cell-cell signaling (GO:0007267)	476	70	37.63	+	1.86	0.00256	8.60964
larval somatic muscle development (GO:0007526)	34	14	2.69	+	5.21	0.00249	8.64964
segment specification (GO:0007379)	34	14	2.69	+	5.21	0.00249	8.64964
R3/R4 cell fate commitment (GO:0007464)	16	10	1.26	+	7.91	0.00241	8.69675
developmental growth involved in morphogenesis (GO:0060560)	74	21	5.85	+	3.59	0.00241	8.69675
salivary gland histolysis (GO:0035070)	93	24	7.35	+	3.26	0.00217	8.84809
establishment of ommatidial planar polarity (GO:0042067)	61	19	4.82	+	3.94	0.00206	8.92314
cell fate specification (GO:0001708)	73	21	5.77	+	3.64	0.00195	9.00231
nucleic acid-templated transcription (GO:0097659)	195	38	15.42	+	2.46	0.00189	9.0474
transcription, DNA-templated (GO:0006351)	195	38	15.42	+	2.46	0.00189	9.0474
muscle organ development (GO:0007517)	126	29	9.96	+	2.91	0.00163	9.26091
programmed cell death involved in cell development (GO:0010623)	140	31	11.07	+	2.8	0.00152	9.36171
genital disc development (GO:0035215)	48	17	3.79	+	4.48	0.00141	9.47009
spiracle morphogenesis, open tracheal system (GO:0035277)	23	12	1.82	+	6.6	0.00133	9.55436
regulation of cell morphogenesis (GO:0022604)	184	37	14.55	+	2.54	0.00128	9.60964
establishment of tissue polarity (GO:0007164)	90	24	7.12	+	3.37	0.00123	9.66713
establishment of planar polarity (GO:0001736)	90	24	7.12	+	3.37	0.00123	9.66713
regulation of localization (GO:0032879)	332	55	26.25	+	2.1	0.00121	9.69078
cell surface receptor signaling pathway (GO:0007166)	373	60	29.49	+	2.03	0.000954	10.0337
cardiac cell fate commitment (GO:0060911)	11	9	0.87	+	10.35	0.000946	10.0459
regulation of developmental growth (GO:0048638)	237	44	18.74	+	2.35	0.00094	10.0551
development of primary sexual characteristics (GO:0045137)	52	18	4.11	+	4.38	0.000911	10.1003
gonad development (GO:0008406)	52	18	4.11	+	4.38	0.000911	10.1003
programmed cell death (GO:0012501)	189	38	14.94	+	2.54	0.0009	10.1178
response to alcohol (GO:0097305)	115	28	9.09	+	3.08	0.000858	10.1867
cardiocyte differentiation (GO:0035051)	22	12	1.74	+	6.9	0.000838	10.2208
positive regulation of programmed cell death (GO:0043068)	75	22	5.93	+	3.71	0.000778	10.3279
immune response (GO:0006955)	180	37	14.23	+	2.6	0.000761	10.3598
regulation of organ morphogenesis (GO:2000027)	94	25	7.43	+	3.36	0.000751	10.3789
chemosensory behavior (GO:0007635)	121	29	9.57	+	3.03	0.000731	10.4178
stem cell population maintenance (GO:0019827)	86	24	6.8	+	3.53	0.000556	10.8126
maintenance of cell number (GO:0098727)	86	24	6.8	+	3.53	0.000556	10.8126
R3/R4 cell differentiation (GO:0048056)	17	11	1.34	+	8.18	0.000494	10.9832
memory (GO:0007613)	110	28	8.7	+	3.22	0.000358	11.4478
cell death (GO:0008219)	195	40	15.42	+	2.59	0.000268	11.8655
response to organic substance (GO:0010033)	356	60	28.15	+	2.13	0.000206	12.2451
aging (GO:0007568)	177	38	13.99	+	2.72	0.000182	12.4238
positive regulation of response to stimulus (GO:0048584)	371	62	29.33	+	2.11	0.000168	12.5393
determination of adult lifespan (GO:0008340)	169	37	13.36	+	2.77	0.000167	12.5479
formation of anatomical boundary (GO:0048859)	46	18	3.64	+	4.95	0.000155	12.6554
olfactory behavior (GO:0042048)	112	29	8.85	+	3.28	0.000151	12.6932
aggressive behavior (GO:0002118)	62	21	4.9	+	4.28	0.000142	12.7818
digestive system development (GO:0055123)	105	28	8.3	+	3.37	0.000141	12.792
digestive tract development (GO:0048565)	105	28	8.3	+	3.37	0.000141	12.792
brain development (GO:0007420)	125	31	9.88	+	3.14	0.000137	12.8335
cognition (GO:0050890)	160	36	12.65	+	2.85	0.000131	12.8981
learning or memory (GO:0007611)	160	36	12.65	+	2.85	0.000131	12.8981
photoreceptor cell fate commitment (GO:0046552)	56	20	4.43	+	4.52	0.000126	12.9543
somatic muscle development (GO:0007525)	85	25	6.72	+	3.72	0.000118	13.0489
multi-organism behavior (GO:0051705)	67	22	5.3	+	4.15	0.000117	13.0612
actin filament-based process (GO:0030029)	235	46	18.58	+	2.48	0.000116	13.0736
regulation of cell death (GO:0010941)	219	44	17.31	+	2.54	0.000111	13.1372
DNA-templated transcription, initiation (GO:0006352)	97	27	7.67	+	3.52	0.000104	13.2311
regulation of anatomical structure size (GO:0090066)	203	42	16.05	+	2.62	0.000103	13.2451
multicellular organism aging (GO:0010259)	172	38	13.6	+	2.79	8.87e-05	13.4607
actin cytoskeleton organization (GO:0030036)	217	44	17.16	+	2.56	8.61e-05	13.5036
neuroblast differentiation (GO:0014016)	44	18	3.48	+	5.17	8.08e-05	13.5953
morphogenesis of a polarized epithelium (GO:0001738)	102	28	8.06	+	3.47	7.81e-05	13.6443
muscle cell differentiation (GO:0042692)	115	30	9.09	+	3.3	7.66e-05	13.6723
regulation of immune system process (GO:0002682)	208	43	16.44	+	2.61	7.25e-05	13.7517
dorsal closure (GO:0007391)	101	28	7.99	+	3.51	6.38e-05	13.9361
eye photoreceptor cell fate commitment (GO:0042706)	53	20	4.19	+	4.77	5.24e-05	14.2201
compound eye photoreceptor fate commitment (GO:0001752)	53	20	4.19	+	4.77	5.24e-05	14.2201
cytoskeleton organization (GO:0007010)	516	80	40.8	+	1.96	4.97e-05	14.2964
immune system process (GO:0002376)	283	53	22.37	+	2.37	4.61e-05	14.4049
leg disc morphogenesis (GO:0007478)	86	26	6.8	+	3.82	3.73e-05	14.7105
peripheral nervous system development (GO:0007422)	86	26	6.8	+	3.82	3.73e-05	14.7105
neuron fate commitment (GO:0048663)	62	22	4.9	+	4.49	3.07e-05	14.9914
imaginal disc-derived leg morphogenesis (GO:0007480)	85	26	6.72	+	3.87	2.96e-05	15.044
regulation of neuron differentiation (GO:0045664)	143	35	11.31	+	3.1	2.67e-05	15.1928
regulation of carbohydrate metabolic process (GO:0006109)	185	41	14.63	+	2.8	2.36e-05	15.3709
regulation of cellular carbohydrate metabolic process (GO:0010675)	180	41	14.23	+	2.88	1.12e-05	16.4461
border follicle cell migration (GO:0007298)	118	32	9.33	+	3.43	1.09e-05	16.4853
regulation of glucose metabolic process (GO:0010906)	179	41	14.15	+	2.9	9.56e-06	16.6746
regulation of programmed cell death (GO:0043067)	186	42	14.71	+	2.86	9.25e-06	16.7221
head development (GO:0060322)	149	37	11.78	+	3.14	7.01e-06	17.1222
sex differentiation (GO:0007548)	96	29	7.59	+	3.82	5.67e-06	17.4282
ventral cord development (GO:0007419)	78	26	6.17	+	4.22	5.32e-06	17.5201
wing disc dorsal/ventral pattern formation (GO:0048190)	46	20	3.64	+	5.5	5.15e-06	17.567
anterior/posterior pattern specification (GO:0009952)	161	39	12.73	+	3.06	5.15e-06	17.567
eye photoreceptor cell differentiation (GO:0001754)	154	38	12.18	+	3.12	5.07e-06	17.5896
establishment or maintenance of cell polarity (GO:0007163)	203	45	16.05	+	2.8	4.46e-06	17.7745
dorsal/ventral pattern formation, imaginal disc (GO:0007450)	50	21	3.95	+	5.31	3.74e-06	18.0285
morphogenesis of embryonic epithelium (GO:0016331)	119	33	9.41	+	3.51	3.67e-06	18.0558
compound eye photoreceptor cell differentiation (GO:0001751)	151	38	11.94	+	3.18	3e-06	18.3466
dorsal/ventral pattern formation (GO:0009953)	137	36	10.83	+	3.32	2.71e-06	18.4933
reproductive system development (GO:0061458)	81	27	6.4	+	4.22	2.62e-06	18.542
reproductive structure development (GO:0048608)	81	27	6.4	+	4.22	2.62e-06	18.542
response to stress (GO:0006950)	1028	139	81.27	+	1.71	1.98e-06	18.9461
ovarian follicle cell migration (GO:0007297)	127	35	10.04	+	3.49	1.38e-06	19.4669
negative regulation of cell differentiation (GO:0045596)	111	33	8.78	+	3.76	6.7e-07	20.5093
gland morphogenesis (GO:0022612)	156	40	12.33	+	3.24	6.5e-07	20.5531
salivary gland morphogenesis (GO:0007435)	156	40	12.33	+	3.24	6.5e-07	20.5531
regulation of cell fate commitment (GO:0010453)	36	19	2.85	+	6.68	5.74e-07	20.7324
cellular response to stimulus (GO:0051716)	1406	179	111.16	+	1.61	5.34e-07	20.8367
dendrite development (GO:0016358)	202	47	15.97	+	2.94	4.21e-07	21.1797
regulation of growth (GO:0040008)	314	62	24.82	+	2.5	3.77e-07	21.3389
wing disc pattern formation (GO:0035222)	72	27	5.69	+	4.74	2.12e-07	22.1694
photoreceptor cell differentiation (GO:0046530)	170	43	13.44	+	3.2	2.1e-07	22.1831
positive regulation of transcription from RNA polymerase II promoter (GO:0045944)	219	50	17.31	+	2.89	2.08e-07	22.1969
dendrite morphogenesis (GO:0048813)	197	47	15.57	+	3.02	1.88e-07	22.3428
regulation of neurogenesis (GO:0050767)	197	47	15.57	+	3.02	1.88e-07	22.3428
negative regulation of multicellular organismal process (GO:0051241)	175	44	13.84	+	3.18	1.53e-07	22.64
regulation of cell fate specification (GO:0042659)	33	19	2.61	+	7.28	1.37e-07	22.7993
tissue migration (GO:0090130)	164	43	12.97	+	3.32	7e-08	23.7681
ameboidal-type cell migration (GO:0001667)	168	44	13.28	+	3.31	4.26e-08	24.4846
negative regulation of transcription from RNA polymerase II promoter (GO:0000122)	129	38	10.2	+	3.73	3.89e-08	24.6157
multicellular organism reproduction (GO:0032504)	1200	163	94.87	+	1.72	3.68e-08	24.6957
single-organism behavior (GO:0044708)	390	74	30.83	+	2.4	3.66e-08	24.7036
stem cell differentiation (GO:0048863)	66	27	5.22	+	5.17	3.16e-08	24.9155
positive regulation of cellular biosynthetic process (GO:0031328)	371	72	29.33	+	2.45	2.58e-08	25.2081
positive regulation of biosynthetic process (GO:0009891)	371	72	29.33	+	2.45	2.58e-08	25.2081
regulation of anatomical structure morphogenesis (GO:0022603)	285	61	22.53	+	2.71	2.31e-08	25.3675
positive regulation of macromolecule biosynthetic process (GO:0010557)	329	67	26.01	+	2.58	1.83e-08	25.7036
epithelium migration (GO:0090132)	157	43	12.41	+	3.46	1.81e-08	25.7194
axon guidance (GO:0007411)	246	56	19.45	+	2.88	1.69e-08	25.8184
epithelial cell migration (GO:0010631)	156	43	12.33	+	3.49	1.48e-08	26.0098
positive regulation of nitrogen compound metabolic process (GO:0051173)	374	73	29.57	+	2.47	1.42e-08	26.0695
embryonic development via the syncytial blastoderm (GO:0001700)	175	46	13.84	+	3.32	1.31e-08	26.1859
negative regulation of developmental process (GO:0051093)	187	48	14.78	+	3.25	1.02e-08	26.5469
embryo development ending in birth or egg hatching (GO:0009792)	180	47	14.23	+	3.3	9.62e-09	26.6313
biological_process (GO:0008150)	11138	971	880.57	+	1.1	9.24e-09	26.6895
leg disc development (GO:0035218)	105	35	8.3	+	4.22	9.09e-09	26.7131
blastoderm segmentation (GO:0007350)	186	48	14.71	+	3.26	8.47e-09	26.815
regulation of cell proliferation (GO:0042127)	179	47	14.15	+	3.32	7.97e-09	26.9028
regulation of nervous system development (GO:0051960)	294	64	23.24	+	2.75	3.46e-09	28.1066
exocrine system development (GO:0035272)	181	48	14.31	+	3.35	3.32e-09	28.1662
salivary gland development (GO:0007431)	181	48	14.31	+	3.35	3.32e-09	28.1662
positive regulation of nucleobase-containing compound metabolic process (GO:0045935)	331	69	26.17	+	2.64	3.14e-09	28.2466
regulation of signal transduction (GO:0009966)	661	109	52.26	+	2.09	2.95e-09	28.3366
compound eye morphogenesis (GO:0001745)	256	59	20.24	+	2.92	2.8e-09	28.4119
neuron projection guidance (GO:0097485)	255	59	20.16	+	2.93	2.39e-09	28.6403
developmental growth (GO:0048589)	166	46	13.12	+	3.51	2.26e-09	28.721
larval development (GO:0002164)	147	43	11.62	+	3.7	2.25e-09	28.7274
positive regulation of RNA biosynthetic process (GO:1902680)	296	65	23.4	+	2.78	1.58e-09	29.2374
positive regulation of transcription, DNA-templated (GO:0045893)	296	65	23.4	+	2.78	1.58e-09	29.2374
positive regulation of nucleic acid-templated transcription (GO:1903508)	296	65	23.4	+	2.78	1.58e-09	29.2374
positive regulation of gene expression (GO:0010628)	346	72	27.35	+	2.63	1.09e-09	29.773
negative regulation of signal transduction (GO:0009968)	257	60	20.32	+	2.95	1.06e-09	29.8133
positive regulation of RNA metabolic process (GO:0051254)	306	67	24.19	+	2.77	7.87e-10	30.2429
negative regulation of cell communication (GO:0010648)	275	63	21.74	+	2.9	6.09e-10	30.6128
negative regulation of signaling (GO:0023057)	275	63	21.74	+	2.9	6.09e-10	30.6128
sensory organ morphogenesis (GO:0090596)	267	62	21.11	+	2.94	5.36e-10	30.797
eye morphogenesis (GO:0048592)	267	62	21.11	+	2.94	5.36e-10	30.797
chemotaxis (GO:0006935)	267	62	21.11	+	2.94	5.36e-10	30.797
embryonic pattern specification (GO:0009880)	204	53	16.13	+	3.29	4.85e-10	30.9413
reproduction (GO:0000003)	1365	187	107.92	+	1.73	3.85e-10	31.2744
regulation of cell communication (GO:0010646)	753	122	59.53	+	2.05	3.77e-10	31.3047
regulation of signaling (GO:0023051)	753	122	59.53	+	2.05	3.77e-10	31.3047
signal transduction (GO:0007165)	934	142	73.84	+	1.92	3.64e-10	31.3553
regulation of biological quality (GO:0065008)	1094	160	86.49	+	1.85	1.92e-10	32.2782
response to external stimulus (GO:0009605)	884	138	69.89	+	1.97	1.24e-10	32.9089
negative regulation of response to stimulus (GO:0048585)	306	69	24.19	+	2.85	8.92e-11	33.3842
growth (GO:0040007)	195	53	15.42	+	3.44	8.67e-11	33.4252
imaginal disc pattern formation (GO:0007447)	99	37	7.83	+	4.73	7.82e-11	33.574
positive regulation of cellular metabolic process (GO:0031325)	539	99	42.61	+	2.32	7.45e-11	33.644
epithelial cell development (GO:0002064)	347	75	27.43	+	2.73	5.45e-11	34.095
heart development (GO:0007507)	102	38	8.06	+	4.71	3.87e-11	34.5889
circulatory system development (GO:0072359)	102	38	8.06	+	4.71	3.87e-11	34.5889
regulation of cell development (GO:0060284)	250	62	19.77	+	3.14	3.21e-11	34.8586
localization of cell (GO:0051674)	290	68	22.93	+	2.97	2.27e-11	35.3585
cell communication (GO:0007154)	1380	193	109.1	+	1.77	2.08e-11	35.4846
columnar/cuboidal epithelial cell development (GO:0002066)	318	72	25.14	+	2.86	1.99e-11	35.5484
positive regulation of macromolecule metabolic process (GO:0010604)	527	99	41.66	+	2.38	1.94e-11	35.5852
muscle structure development (GO:0061061)	247	62	19.53	+	3.17	1.9e-11	35.6152
columnar/cuboidal epithelial cell differentiation (GO:0002065)	325	73	25.69	+	2.84	1.9e-11	35.6152
ovarian follicle cell development (GO:0030707)	317	72	25.06	+	2.87	1.71e-11	35.7672
positive regulation of metabolic process (GO:0009893)	574	105	45.38	+	2.31	1.5e-11	35.9562
regulation of cellular component organization (GO:0051128)	691	119	54.63	+	2.18	1.32e-11	36.1407
anatomical structure formation involved in morphogenesis (GO:0048646)	580	106	45.85	+	2.31	1.17e-11	36.3147
axon development (GO:0061564)	305	71	24.11	+	2.94	8.13e-12	36.8399
cell motility (GO:0048870)	282	68	22.29	+	3.05	6.14e-12	37.2449
axonogenesis (GO:0007409)	296	70	23.4	+	2.99	6.02e-12	37.2734
gland development (GO:0048732)	227	60	17.95	+	3.34	5.75e-12	37.3396
multicellular organismal reproductive process (GO:0048609)	1002	155	79.22	+	1.96	5.59e-12	37.3803
cell part morphogenesis (GO:0032990)	614	111	48.54	+	2.29	5.11e-12	37.5098
multi-organism reproductive process (GO:0044703)	1009	156	79.77	+	1.96	4.67e-12	37.6397
sexual reproduction (GO:0019953)	1009	156	79.77	+	1.96	4.67e-12	37.6397
germ cell development (GO:0007281)	737	126	58.27	+	2.16	3.21e-12	38.1806
taxis (GO:0042330)	327	75	25.85	+	2.9	2.79e-12	38.3829
central nervous system development (GO:0007417)	263	66	20.79	+	3.17	2.54e-12	38.5183
compound eye development (GO:0048749)	333	76	26.33	+	2.89	2.3e-12	38.6615
gamete generation (GO:0007276)	872	142	68.94	+	2.06	1.92e-12	38.922
behavior (GO:0007610)	580	108	45.85	+	2.36	1.86e-12	38.9678
signaling (GO:0023052)	1287	187	101.75	+	1.84	1.74e-12	39.064
segmentation (GO:0035282)	227	61	17.95	+	3.4	1.62e-12	39.1671
epithelial cell differentiation (GO:0030855)	397	85	31.39	+	2.71	1.56e-12	39.2216
cell migration (GO:0016477)	267	67	21.11	+	3.17	1.54e-12	39.2402
single organism signaling (GO:0044700)	1285	187	101.59	+	1.84	1.5e-12	39.2782
cell projection morphogenesis (GO:0048858)	602	111	47.59	+	2.33	1.38e-12	39.3985
embryonic morphogenesis (GO:0048598)	230	62	18.18	+	3.41	8.07e-13	40.1725
open tracheal system development (GO:0007424)	230	62	18.18	+	3.41	8.07e-13	40.1725
response to chemical (GO:0042221)	880	144	69.57	+	2.07	7.92e-13	40.1996
cell projection organization (GO:0030030)	683	122	54	+	2.26	4.26e-13	41.0942
eye development (GO:0001654)	349	80	27.59	+	2.9	3.08e-13	41.5621
cellular process involved in reproduction in multicellular organism (GO:0022412)	796	136	62.93	+	2.16	2.15e-13	42.0807
respiratory system development (GO:0060541)	242	65	19.13	+	3.4	1.8e-13	42.3371
female gamete generation (GO:0007292)	639	118	50.52	+	2.34	1.35e-13	42.7521
regulation of response to stimulus (GO:0048583)	856	144	67.68	+	2.13	8.41e-14	43.4349
oogenesis (GO:0048477)	632	118	49.97	+	2.36	6.13e-14	43.8911
reproductive process (GO:0022414)	1165	179	92.11	+	1.94	4.62e-14	44.2991
negative regulation of cellular metabolic process (GO:0031324)	432	93	34.15	+	2.72	4.39e-14	44.3728
negative regulation of metabolic process (GO:0009892)	500	102	39.53	+	2.58	3.84e-14	44.5659
negative regulation of macromolecule metabolic process (GO:0010605)	484	100	38.27	+	2.61	3.61e-14	44.655
single organism reproductive process (GO:0044702)	1022	164	80.8	+	2.03	2.82e-14	45.0113
negative regulation of cellular biosynthetic process (GO:0031327)	319	78	25.22	+	3.09	2.36e-14	45.2682
negative regulation of biosynthetic process (GO:0009890)	319	78	25.22	+	3.09	2.36e-14	45.2682
multi-organism process (GO:0051704)	1305	195	103.17	+	1.89	2.13e-14	45.4161
negative regulation of macromolecule biosynthetic process (GO:0010558)	310	77	24.51	+	3.14	1.65e-14	45.7845
negative regulation of cellular macromolecule biosynthetic process (GO:2000113)	310	77	24.51	+	3.14	1.65e-14	45.7845
negative regulation of nitrogen compound metabolic process (GO:0051172)	336	81	26.56	+	3.05	1.2e-14	46.244
cell fate determination (GO:0001709)	144	51	11.38	+	4.48	9.36e-15	46.6024
neuron projection development (GO:0031175)	551	110	43.56	+	2.53	8.47e-15	46.7466
negative regulation of gene expression (GO:0010629)	381	88	30.12	+	2.92	5.37e-15	47.404
developmental process involved in reproduction (GO:0003006)	834	145	65.94	+	2.2	4.07e-15	47.8039
negative regulation of nucleobase-containing compound metabolic process (GO:0045934)	274	73	21.66	+	3.37	3.22e-15	48.1419
neuron projection morphogenesis (GO:0048812)	535	109	42.3	+	2.58	2.97e-15	48.2585
cellular component morphogenesis (GO:0032989)	818	144	64.67	+	2.23	1.9e-15	48.9029
cell morphogenesis (GO:0000902)	699	130	55.26	+	2.35	1.64e-15	49.1152
organelle organization (GO:0006996)	1393	208	110.13	+	1.89	1.38e-15	49.3643
single-organism cellular process (GO:0044763)	4423	492	349.68	+	1.41	9.3e-16	49.9336
sensory organ development (GO:0007423)	463	101	36.6	+	2.76	6.77e-16	50.3917
negative regulation of RNA metabolic process (GO:0051253)	258	72	20.4	+	3.53	4.91e-16	50.8551
neurogenesis (GO:0022008)	1435	214	113.45	+	1.89	4.27e-16	51.0566
negative regulation of RNA biosynthetic process (GO:1902679)	244	70	19.29	+	3.63	3.8e-16	51.2249
negative regulation of transcription, DNA-templated (GO:0045892)	244	70	19.29	+	3.63	3.8e-16	51.2249
negative regulation of nucleic acid-templated transcription (GO:1903507)	244	70	19.29	+	3.63	3.8e-16	51.2249
movement of cell or subcellular component (GO:0006928)	618	122	48.86	+	2.5	2.44e-16	51.864
regulation of multicellular organismal development (GO:2000026)	491	106	38.82	+	2.73	1.7e-16	52.3853
regulation of cell differentiation (GO:0045595)	308	81	24.35	+	3.33	8.21e-17	53.4354
regulation of transcription from RNA polymerase II promoter (GO:0006357)	455	103	35.97	+	2.86	2.25e-17	55.3029
regulation of multicellular organismal process (GO:0051239)	682	134	53.92	+	2.49	4.57e-18	57.6025
neuron development (GO:0048666)	679	134	53.68	+	2.5	3.14e-18	58.1439
cell morphogenesis involved in neuron differentiation (GO:0048667)	441	104	34.87	+	2.98	7.83e-19	60.1476
response to stimulus (GO:0050896)	2383	319	188.4	+	1.69	5.77e-19	60.5881
multicellular organismal process (GO:0032501)	4203	488	332.29	+	1.47	1.56e-19	62.4751
positive regulation of cellular process (GO:0048522)	1015	178	80.25	+	2.22	9.61e-20	63.174
cellular component biogenesis (GO:0044085)	816	156	64.51	+	2.42	2.06e-20	65.3959
cell morphogenesis involved in differentiation (GO:0000904)	485	114	38.34	+	2.97	8.44e-21	66.6832
nervous system development (GO:0007399)	1585	245	125.31	+	1.96	3.48e-21	67.9614
protein complex subunit organization (GO:0071822)	293	87	23.16	+	3.76	1.28e-21	69.4043
cellular component assembly (GO:0022607)	754	152	59.61	+	2.55	5.04e-22	70.749
regulation of nitrogen compound metabolic process (GO:0051171)	1104	195	87.28	+	2.23	2.16e-22	71.9714
regulation of gene expression (GO:0010468)	1115	197	88.15	+	2.23	1.11e-22	72.9319
macromolecular complex assembly (GO:0065003)	299	90	23.64	+	3.81	7.44e-23	73.509
regionalization (GO:0003002)	445	113	35.18	+	3.21	2.94e-23	74.8485
regulation of developmental process (GO:0050793)	701	148	55.42	+	2.67	2.72e-23	74.9607
regulation of metabolic process (GO:0019222)	1595	252	126.1	+	2	2.72e-23	74.9607
cellular macromolecular complex assembly (GO:0034622)	258	84	20.4	+	4.12	2.36e-23	75.1656
neuron differentiation (GO:0030182)	778	158	61.51	+	2.57	2.29e-23	75.209
locomotion (GO:0040011)	596	135	47.12	+	2.87	1.03e-23	76.3617
regulation of macromolecule metabolic process (GO:0060255)	1435	236	113.45	+	2.08	8.25e-24	76.6819
regulation of cellular metabolic process (GO:0031323)	1479	241	116.93	+	2.06	7.14e-24	76.8904
regulation of nucleobase-containing compound metabolic process (GO:0019219)	979	184	77.4	+	2.38	6.27e-24	77.0778
regulation of primary metabolic process (GO:0080090)	1477	241	116.77	+	2.06	5.92e-24	77.1607
regulation of biosynthetic process (GO:0009889)	1028	190	81.27	+	2.34	5.43e-24	77.2853
regulation of cellular biosynthetic process (GO:0031326)	1027	190	81.19	+	2.34	4.84e-24	77.4513
regulation of RNA metabolic process (GO:0051252)	933	179	73.76	+	2.43	3.61e-24	77.8743
positive regulation of biological process (GO:0048518)	1172	208	92.66	+	2.24	1.86e-24	78.831
cellular developmental process (GO:0048869)	2330	332	184.21	+	1.8	1.08e-24	79.6152
regulation of macromolecule biosynthetic process (GO:0010556)	979	186	77.4	+	2.4	8.74e-25	79.9206
single-organism process (GO:0044699)	5669	631	448.19	+	1.41	8.14e-25	80.0232
regulation of cellular macromolecule biosynthetic process (GO:2000112)	976	186	77.16	+	2.41	6.09e-25	80.4418
cell development (GO:0048468)	1442	240	114	+	2.11	4.9e-25	80.7554
pattern specification process (GO:0007389)	482	122	38.11	+	3.2	3.13e-25	81.402
protein complex biogenesis (GO:0070271)	239	84	18.9	+	4.45	1.54e-25	82.4253
protein complex assembly (GO:0006461)	237	84	18.74	+	4.48	8.8e-26	83.2326
regulation of RNA biosynthetic process (GO:2001141)	853	173	67.44	+	2.57	6.73e-26	83.6195
regulation of transcription, DNA-templated (GO:0006355)	853	173	67.44	+	2.57	6.73e-26	83.6195
regulation of nucleic acid-templated transcription (GO:1903506)	853	173	67.44	+	2.57	6.73e-26	83.6195
generation of neurons (GO:0048699)	917	181	72.5	+	2.5	6.52e-26	83.6653
embryo development (GO:0009790)	486	124	38.42	+	3.23	5.25e-26	83.9778
cell fate commitment (GO:0045165)	465	121	36.76	+	3.29	4.81e-26	84.1041
negative regulation of cellular process (GO:0048523)	996	191	78.74	+	2.43	4.62e-26	84.1622
cell differentiation (GO:0030154)	2247	328	177.65	+	1.85	3.73e-26	84.471
imaginal disc-derived wing morphogenesis (GO:0007476)	352	104	27.83	+	3.74	3.37e-26	84.6174
negative regulation of biological process (GO:0048519)	1130	208	89.34	+	2.33	1.74e-26	85.571
wing disc morphogenesis (GO:0007472)	359	106	28.38	+	3.73	9.77e-27	86.4037
biological regulation (GO:0065007)	3604	463	284.93	+	1.62	9.09e-28	89.8297
chromosome organization (GO:0051276)	305	99	24.11	+	4.11	6.75e-28	90.2591
post-embryonic appendage morphogenesis (GO:0035120)	401	119	31.7	+	3.75	1.37e-30	99.2037
wing disc development (GO:0035220)	474	131	37.47	+	3.5	5.55e-31	100.507
regulation of biological process (GO:0050789)	3269	444	258.45	+	1.72	9.77e-32	103.013
imaginal disc-derived appendage morphogenesis (GO:0035114)	408	122	32.26	+	3.78	9.46e-32	103.06
imaginal disc-derived appendage development (GO:0048737)	412	123	32.57	+	3.78	5.66e-32	103.801
appendage morphogenesis (GO:0035107)	411	123	32.49	+	3.79	4.51e-32	104.129
appendage development (GO:0048736)	417	125	32.97	+	3.79	1.02e-32	106.273
protein-DNA complex subunit organization (GO:0071824)	137	73	10.83	+	6.74	8.3e-33	106.571
DNA conformation change (GO:0071103)	161	79	12.73	+	6.21	2.75e-33	108.164
DNA packaging (GO:0006323)	151	78	11.94	+	6.53	2.55e-34	111.595
regulation of cellular process (GO:0050794)	3030	429	239.55	+	1.79	1.84e-34	112.066
anatomical structure development (GO:0048856)	3186	445	251.89	+	1.77	7.82e-35	113.3
instar larval or pupal development (GO:0002165)	666	166	52.65	+	3.15	6.99e-35	113.462
epithelial tube morphogenesis (GO:0060562)	541	149	42.77	+	3.48	1.36e-35	115.824
post-embryonic animal organ morphogenesis (GO:0048563)	467	138	36.92	+	3.74	7.61e-36	116.662
imaginal disc morphogenesis (GO:0007560)	467	138	36.92	+	3.74	7.61e-36	116.662
nucleosome organization (GO:0034728)	117	72	9.25	+	7.78	3e-36	118.004
developmental process (GO:0032502)	3313	464	261.93	+	1.77	2.45e-37	121.619
tube morphogenesis (GO:0035239)	573	157	45.3	+	3.47	1.8e-37	122.063
single-organism developmental process (GO:0044767)	3288	462	259.95	+	1.78	1.79e-37	122.071
multicellular organism development (GO:0007275)	2830	418	223.74	+	1.87	1.34e-37	122.489
post-embryonic development (GO:0009791)	732	182	57.87	+	3.14	1.44e-38	125.707
macromolecular complex subunit organization (GO:0043933)	607	164	47.99	+	3.42	1.34e-38	125.811
instar larval or pupal morphogenesis (GO:0048707)	565	158	44.67	+	3.54	8.78e-39	126.421
post-embryonic animal morphogenesis (GO:0009886)	577	160	45.62	+	3.51	6.83e-39	126.783
metamorphosis (GO:0007552)	589	162	46.57	+	3.48	5.25e-39	127.163
protein-DNA complex assembly (GO:0065004)	103	72	8.14	+	8.84	8.68e-40	129.759	protein-DNA complex assembly
cellular process (GO:0009987)	5989	704	473.49	+	1.49	3.97e-40	130.888	cellular process
post-embryonic animal organ development (GO:0048569)	530	156	41.9	+	3.72	7.41e-41	133.31	post-embryonic animal organ development
single-multicellular organism process (GO:0044707)	3132	457	247.62	+	1.85	3.2e-41	134.521	single-multicellular organism process
tissue morphogenesis (GO:0048729)	674	180	53.29	+	3.38	3.57e-42	137.685	tissue morphogenesis
morphogenesis of an epithelium (GO:0002009)	660	178	52.18	+	3.41	3.28e-42	137.807	morphogenesis of an epithelium
nucleosome assembly (GO:0006334)	90	71	7.12	+	9.98	1.46e-42	138.975	nucleosome assembly
imaginal disc development (GO:0007444)	640	177	50.6	+	3.5	2.19e-43	141.712	imaginal disc development
chromatin assembly (GO:0031497)	97	74	7.67	+	9.65	1.72e-43	142.06	chromatin assembly
cellular component organization or biogenesis (GO:0071840)	2487	399	196.62	+	2.03	8.4e-44	143.094	cellular component organization or biogenesis
cellular component organization (GO:0016043)	2438	395	192.75	+	2.05	2.97e-44	144.594	cellular component organization
tissue development (GO:0009888)	1126	247	89.02	+	2.77	4.57e-45	147.295	tissue development
tube development (GO:0035295)	782	201	61.83	+	3.25	2.73e-45	148.038	tube development
system development (GO:0048731)	2270	380	179.47	+	2.12	2.19e-45	148.356	system development
anatomical structure morphogenesis (GO:0009653)	1722	320	136.14	+	2.35	1.49e-45	148.911	anatomical structure morphogenesis
epithelium development (GO:0060429)	1050	239	83.01	+	2.88	4.77e-46	150.555	epithelium development
animal organ morphogenesis (GO:0009887)	843	216	66.65	+	3.24	6.15e-49	160.154	animal organ morphogenesis
chromatin organization (GO:0006325)	370	147	29.25	+	5.03	1.89e-53	175.144	chromatin organization
animal organ development (GO:0048513)	1316	297	104.04	+	2.85	1.07e-58	192.574	animal organ development
chromatin assembly or disassembly (GO:0006333)	122	97	9.65	+	10.06	1.87e-59	195.091	chromatin assembly or disassembly
Unclassified (UNCLASSIFIED)	3079	153	243.43	-	0.63	0	#NUM!
