# Supplementary material for: Atrophin controls developmental signaling pathways via interactions with Trithorax-like
Source: eLife journal article supplement (doi:10.7554/elife.23084), 2017-03-22
Supplement: supp [file elife-23084-supp-v1.zip › elife_poa_e23084_Figure_1_Source_Data_2.xlsx]

## Sheet: Rawdata
		class	H1	H3K27me3	H3K36me1	H2Bubi	H3K79me2	H3K9acS10P	H3K9ac	H4acTetra	H4K16ac	H4K5ac	BEAF-32	Chriz	BRE1	CP190	JMJD2A-KDM4A	ASH-1	MRG15	MLE	ZW5	POF	Su_var_3-7	HP1a	Su_var_3-9	H3K4me1	dRING	dSFMBT	Pho	Ez_S2	PCL	Pc	Psc	H2	H3K36me3	H3K23ac	H3K27me2	H3K9me2	H3K79me1	H3	H3K9me3	HP2	mod_mdg4	Su_Hw	JIL-1	MSL-1	H4K20me1	H4	H3K4me3
		1	-0.297976	-0.192217	0.0329744	0.0856582	0.153944	0.279256	0.317071	0.320167	0.225207	0.120083	0.202339	0.22321	0.179243	0.11352	0.168444	0.149209	0.229663	0.231114	0.210084	0.262436	0.191816	0.16709	0.141858	0.17445	0.227288	0.290588	0.228449	0.0784945	0.138757	0.0377772	0.0620639	-0.0107561	-0.0417922	-0.0663773	-0.116113	-0.0327024	0.00470961	-0.0458715	-0.00418637	0.0567565	0.023462	0.036233	0.0725315	0.0874695	0.0897325	-0.0847221	0.835541
		2	-0.15239	0.292198	-0.0383618	-0.0684608	-0.0435009	0.00409902	-0.00367102	-0.00459107	-0.031008	-0.072857	0.0674979	0.0081994	0.0474308	0.032395	0.0503138	0.101053	0.0223512	0.0829809	0.0518658	0.0359147	0.051284	0.0788404	0.0466329	0.220082	0.651338	0.600331	0.479411	0.338092	0.503416	0.498044	0.616982	-0.0807661	-0.047204	-0.0191509	-0.0569952	0.031975	0.00654487	0.00564061	0.0407109	0.0104852	0.0182893	0.0446296	-0.0277982	0.0302277	0.122676	0.080277	0.212318
		3	-0.14537	-0.0932441	0.0851157	0.0488691	0.085163	0.10485	0.137688	0.143847	0.0874453	0.0497993	0.104547	0.0955965	0.085417	0.0626117	0.117434	0.0893301	0.103524	0.123466	0.11842	0.11026	0.0864115	0.124081	0.0861238	0.192603	0.153994	0.149209	0.113821	0.053504	0.0782647	0.0366398	0.0344959	-0.0189276	-0.0148266	-0.0243095	-0.0249451	0.0397899	0.012634	-0.0124647	0.0274504	0.0262223	0.024794	0.0347516	0.0283618	0.0499038	0.0915417	-0.0196578	0.404512
Region	NAME	class	H1	H3K27me3	H3K36me1	H2Bubi	H3K79me2	H3K9acS10P	H3K9ac	H4acTetra	H4K16ac	H4K5ac	BEAF-32	Chriz	BRE1	CP190	JMJD2A-KDM4A	ASH-1	MRG15	MLE	ZW5	POF	Su_var_3-7	HP1a	Su_var_3-9	H3K4me1	dRING	dSFMBT	Pho	Ez_S2	PCL	Pc	Psc	H2	H3K36me3	H3K23ac	H3K27me2	H3K9me2	H3K79me1	H3	H3K9me3	HP2	mod_mdg4	Su_Hw	JIL-1	MSL-1	H4K20me1	H4	H3K4me3
chr2L_11045060_11045699	chr2L_11045060_11045699	1	-0.199961	-0.30762	-0.144685	-0.115915	-0.153125	0.278122	0.147897	0.200227	0.097195	0.099442	0.167643	0.106553	0.117298	0.12144	0.204366	0.115251	0.17448	0.326399	0.331479	0.486494	0.254505	0.221845	0.156394	0.168902	0.472674	0.433482	0.341764	0.131452	0.245573	0.062767	0.198724	-0.154073	-0.112112	-0.199	-0.154288	-0.112699	-0.011431	-0.069312	-0.040578	0.106261	0.031236	0.205356	0.037539	0.029208	-0.008314	-0.157682	-0.297861
chr2L_11066229_11067271	chr2L_11066229_11067271	1	-0.253711	-0.177479	0.137733	0.01848	0.143354	0.196678	0.223755	0.25641	0.031745	0.12085	0.110181	0.053584	0.060142	0.023293	0.030957	0.092791	0.180924	0.226461	0.12747	0.352208	0.128551	0.184867	0.231274	0.290227	0.139957	0.277399	0.148046	0.131203	0.056929	0.045802	0.023627	0.018901	-0.066853	0.046748	-0.029045	0.133574	0.010489	0.012177	0.027595	0.065156	0.039037	0.054769	0.070336	0.124896	0.127471	-0.091662	0.800559
chr2L_1118927_1119625	chr2L_1118927_1119625	1	-0.345313	-0.190761	0.11327	-0.03648	0.497084	0.238721	0.310384	0.414146	0.076462	0.122925	0.207816	0.291965	0.363169	0.386046	0.207305	0.090715	0.457932	0.248031	0.199746	0.236631	0.229409	0.186775	0.248956	0.526883	0.194832	0.281357	0.172343	0.108588	0.074908	0.019585	0.127267	0.133531	-0.142442	0.016774	0.043458	0.030023	0.048416	-0.078516	0.055585	0.069506	0.058052	0.007927	0.183826	0.034993	0.13981	0.078861	0.393305
chr2L_12055853_12056330	chr2L_12055853_12056330	1	-0.245291	-0.234778	-0.080067	0.159167	0.171448	0.530664	0.47447	0.243389	0.194651	0.040533	0.576802	0.640023	0.269269	0.238794	0.118241	0.038086	0.334065	0.152146	0.701993	0.178351	0.110199	0.066299	0.256904	0.075555	0.149343	0.208573	0.121689	0.058299	0.048523	-0.007487	0.0044	0.227229	0.077928	-0.186524	-0.159112	0.114064	-0.010664	-0.089536	0.048304	0.066713	-0.00206	-0.040569	0.152773	0.070277	-0.006997	-0.218592	1.69358
chr2L_12461125_12461738	chr2L_12461125_12461738	1	-0.369776	-0.265898	0.234145	0.21129	0.170652	0.255119	0.376658	0.201499	0.02883	0.095387	0.074383	0.007119	0.14719	0.078497	0.127822	0.295589	0.210956	0.164686	0.286476	0.171094	0.058687	0.055161	0.281535	0.170255	0.158425	0.158358	0.135318	0.117577	0.03504	0.020394	0.073817	-0.186675	-0.074722	-0.124804	-0.200256	-0.11794	-0.001851	-0.101491	-0.094344	0.017348	0.039954	0.01042	-0.017949	0.007817	0.083065	-0.34069	1.32988
chr2L_12482847_12483348	chr2L_12482847_12483348	1	-0.324245	-0.25501	0.415258	0.213237	0.294463	0.239874	0.254089	0.287098	0.201128	0.069309	0.180088	0.033972	0.016027	-0.01714	0.110499	0.277757	0.208593	0.085098	0.133549	0.06764	0.103239	0.143789	0.164869	0.104275	0.074486	0.142822	0.162071	-0.03097	0.040996	-0.033617	-0.032237	-0.125391	-0.087584	-0.050962	-0.129127	-0.106638	0.00108	-0.066785	-0.05839	0.075437	-0.00117	-0.038215	-0.064266	-0.010375	-0.028272	-0.339567	0.978509
chr2L_13511430_13511703	chr2L_13511430_13511703	1	-0.514925	-0.439558	-0.008665	0.039247	0.164368	0.24985	0.156501	0.396752	0.291243	0.159311	0.119756	0.103732	0.150137	-0.004853	0.239739	0.095427	0.132787	0.236422	0.234431	0.277236	0.195521	0.369734	0.185371	0.284897	0.235199	0.256508	0.24952	0.023827	0.241382	-0.024778	0.066317	-0.308789	-0.032807	-0.324668	-0.314188	-0.357858	-0.014262	-0.123374	0.114461	0.117123	0.07984	-0.011099	0.055023	0.074829	0.047123	-0.069747	0.780772
chr2L_13572421_13572898	chr2L_13572421_13572898	1	-0.13082	-0.232075	0.028476	0.071473	0.123047	0.115725	0.014893	0.18289	0.096133	0.144132	0.31539	0.188697	0.128886	0.062823	0.614747	0.095455	0.179466	0.285963	0.220796	0.382809	0.237524	0.184673	0.192614	0.23226	0.308349	0.276113	0.253398	0.096981	0.24453	0.067603	0.035947	-0.243268	0.000762	-0.153513	-0.076056	0.102091	0.00677	-0.033106	0.042048	0.11023	-0.007019	0.037368	0.024982	0.038816	0.01769	-0.136896	0.000749
chr2L_14021587_14022043	chr2L_14021587_14022043	1	0.006638	-0.179957	-0.020107	0.044615	0.112707	0.182107	0.079206	0.322874	0.136332	0.142354	0.078566	0.083768	0.093606	0.023292	0.247707	0.137188	0.182731	0.332324	0.28151	0.253528	0.241585	0.156107	0.060374	0.275091	0.283743	0.280484	0.272521	0.111483	0.15962	0.033353	0.146689	-0.012871	0.002443	-0.030916	0.004952	0.014077	0.003954	-0.009986	0.021296	-0.011451	0.032847	0.046164	-0.00795	0.142609	0.122444	0.005091	0.188424
chr2L_14023750_14024408	chr2L_14023750_14024408	1	-0.005979	-0.175708	0.13265	-0.0497	0.037495	0.188194	0.041226	0.154039	0.145624	0.084972	0.102855	0.166492	0.123161	0.060336	0.217479	0.143913	0.191546	0.24769	0.34508	0.321162	0.306909	0.217158	0.204989	0.25094	0.459994	0.224409	0.177743	0.127248	0.343393	0.07391	0.345743	0.016257	0.06695	-0.029671	0.047014	0.193178	0.015507	0.015099	0.13419	0.018421	-0.001468	0.015355	0.003488	0.08418	0.322539	0.062342	-0.375992
chr2L_15745541_15745891	chr2L_15745541_15745891	1	-0.178465	-0.30955	-0.113392	-0.004963	0.068166	0.301944	0.270039	0.156668	0.178613	0.016464	0.090701	0.225184	0.119639	0.095614	0.052455	0.088735	0.157123	0.182005	0.105205	0.163992	0.138139	0.156246	0.042397	0.098612	0.130558	0.246709	0.129281	0.030505	0.030526	-0.003817	-0.00225	0.157523	0.134209	-0.165627	-0.017465	0.002805	0.002201	-0.033182	-0.006566	0.053223	0.008815	0.020169	0.018275	0.025955	-0.032818	-0.103007	0.894649
chr2L_16269274_16269966	chr2L_16269274_16269966	1	-0.40124	-0.070008	0.183921	-0.060854	0.048768	0.331435	0.3987	0.452762	0.328179	0.177709	0.123021	0.138064	0.06459	0.184555	0.089914	0.201079	0.248561	0.181134	0.166088	0.351586	0.182752	0.173561	0.167194	0.261322	0.179968	0.455729	0.356102	0.048746	0.0993	0.022554	0.034201	-0.023691	-0.024766	-0.070618	-0.146673	-0.031742	0.006047	-0.0686	-0.004274	0.103644	0.016524	0.007436	-0.030673	0.072246	-0.040181	-0.148054	-0.309639
chr2L_16286463_16287929	chr2L_16286463_16287929	1	-0.298131	-0.054494	-0.13732	0.148335	0.183421	0.416851	0.378501	0.197655	0.014133	0.002515	0.767482	0.603556	0.651941	0.667221	0.168972	0.192411	0.153243	0.283512	0.184145	0.279913	0.342557	0.168698	0.22349	0.14955	0.131343	0.351258	0.323737	0.05802	0.116853	0.048778	0.094121	-0.021528	-0.041642	-0.144436	0.009762	0.006465	0.008835	-0.037658	0.006236	0.097888	0.034071	0.051404	0.022284	0.087178	0.165377	-0.073749	1.67825
chr2L_16325464_16326055	chr2L_16325464_16326055	1	-0.256312	-0.214215	-0.147862	0.119859	0.248405	0.195916	0.495985	0.292444	0.08188	-0.004921	0.387714	0.616505	0.29826	0.21873	0.282968	0.105761	0.13678	0.214731	0.112667	0.25513	0.146611	0.19594	0.365535	0.046253	0.101064	0.17632	0.16015	0.080721	0.066515	-0.016762	0.044581	0.135866	-0.053453	-0.13611	-0.052299	0.03198	-0.005152	-0.039066	-0.021312	0.257792	0.013831	0.01445	0.101895	0.075676	-0.129591	-0.157423	1.67474
chr2L_1667553_1667831	chr2L_1667553_1667831	1	-0.45482	-0.239993	-0.054266	-0.029002	-0.031227	0.320906	0.41383	0.469989	0.304034	0.208615	0.068699	0.014702	0.102777	-0.003101	-0.029163	0.237321	0.187735	0.130243	0.279218	0.253334	0.137301	0.148468	0.04687	0.091084	0.226412	0.233606	0.148452	0.035435	0.059527	0.084403	0.056781	-0.026804	-0.169067	-0.079781	-0.164518	0.03874	0.014011	-0.082597	-0.012034	-0.043394	-0.039427	0.036911	-0.098494	0.09481	0.157048	-0.062843	0.795941
chr2L_1668419_1668998	chr2L_1668419_1668998	1	-0.197427	-0.154114	-0.124081	0.076268	0.1249	0.310771	0.416602	0.433601	0.361231	0.180282	0.12593	0.063035	0.071754	0.010491	0.016101	0.15836	0.123314	0.084083	0.11398	0.155611	0.136211	0.177728	0.1407	0.200168	0.234068	0.194816	0.140505	0.05086	0.096789	0.113497	0.077934	-0.058931	0.067847	0.054488	-0.004605	0.000571	0.018154	-0.015086	-0.011706	0.042471	0.007065	0.018824	0.006684	0.01078	0.027941	-0.18299	0.856833
chr2L_17450224_17450753	chr2L_17450224_17450753	1	-0.188961	-0.119961	0.026018	0.001267	0.064198	0.363832	0.245578	0.290267	0.179353	0.080079	0.399932	0.494651	0.371272	0.399196	0.16408	0.033981	0.158873	0.195077	0.204567	0.238399	0.348587	0.196417	0.254086	0.123593	0.240207	0.435251	0.265152	0.056942	0.144485	0.050178	0.038641	0.251562	0.062459	-0.104957	-0.048558	-0.005484	0.008127	-0.051728	0.009818	0.073124	0.019158	0.016118	0.089224	0.025723	-0.024012	-0.094398	0.694884
chr2L_18626906_18627227	chr2L_18626906_18627227	1	-0.519678	-0.282681	0.032181	-0.001301	-0.109945	0.121576	0.1276	0.287094	0.089562	0.15649	0.057413	-0.030978	0.092612	-0.030533	0.028481	0.254465	0.202196	0.164496	0.279855	0.355478	0.221833	0.08681	-0.077078	0.232068	0.240856	0.244255	0.159669	0.020243	0.111121	0.010101	0.043468	-0.25546	-0.138435	-0.152112	-0.185796	-0.247693	0.001679	-0.105213	-0.136286	0.021066	-0.025899	0.009001	0.010847	-0.02225	0.291731	-0.115569	-0.126254
chr2L_19140724_19141804	chr2L_19140724_19141804	1	-0.33317	-0.161358	0.03493	-0.059387	0.036769	0.191508	0.218898	0.300379	0.187016	0.194015	0.121223	0.135013	0.1166	0.045662	0.041556	0.173592	0.280747	0.323476	0.235811	0.438461	0.330716	0.26207	0.202787	0.162267	0.407685	0.319284	0.230798	0.101402	0.180652	0.046571	0.015651	-0.120498	-0.054212	-0.056448	-0.108885	-0.03805	-0.010331	-0.050698	0.032744	0.111227	0.050357	0.020146	0.053331	0.135689	0.044418	-0.129299	0.031764
chr2L_19161382_19162067	chr2L_19161382_19162067	1	-0.416675	-0.265578	0.047894	0.256038	0.285698	0.296807	0.467639	0.420438	0.350021	0.28197	0.15739	0.045348	0.098463	0.022606	0.164631	0.119506	0.281137	0.222354	0.18477	0.326968	0.167938	0.184884	-0.029577	0.383565	0.175492	0.216709	0.139344	0.073942	0.145358	0.019374	0.008342	-0.203376	-0.170193	0.139451	-0.114721	0.147696	0.013069	0.021859	0.011436	0.018687	0.012829	0.04093	-0.045583	0.107342	0.38959	0.040977	0.319123
chr2L_21237702_21238006	chr2L_21237702_21238006	1	-0.384486	-0.533107	-0.061207	0.076271	0.126334	0.163684	0.287619	0.208841	-0.085285	-0.073429	0.081063	0.30933	0.207144	0.189129	0.006878	0.03859	0.312865	0.147982	0.109013	0.213601	0.213415	0.125072	0.035194	-0.015414	0.180883	0.289657	0.176014	0.0072	-0.037841	-0.008198	0.032791	0.19816	-0.391257	-0.309239	-0.245773	-0.314385	-0.030102	-0.134852	-0.138402	0.176031	-0.038984	-0.032467	-0.033238	0.054598	0.015739	-0.223544	1.45406
chr2L_2161179_2161971	chr2L_2161179_2161971	1	-0.180199	-0.105888	-0.055915	0.206255	0.166704	0.197581	0.54493	0.392897	0.327181	0.203065	0.10309	0.036291	0.129858	0.033598	0.317812	0.086519	0.210376	0.204783	0.179677	0.095184	0.101874	0.318209	0.034322	0.22933	0.425375	0.19762	0.225193	0.040315	0.135011	0.025355	0.040159	-0.124082	0.161016	0.006484	-0.065507	0.109343	0.012662	0.000779	0.122427	0.036814	0.00586	0.089121	0.188385	0.099992	0.18924	0.081842	1.38611
chr2L_2162083_2163665	chr2L_2162083_2163665	1	-0.143893	-0.175305	0.161381	0.0391	0.088105	0.460895	0.390589	0.58604	0.522253	0.273394	0.120392	0.086805	0.08282	0.051221	0.306823	0.139957	0.262846	0.288262	0.263003	0.420254	0.424719	0.247883	0.227152	0.3615	0.264102	0.307839	0.187581	0.083064	0.139285	0.036034	0.122561	-0.098396	0.015286	0.078399	-0.103702	0.049854	0.024353	-0.018402	0.026174	0.107636	0.004537	0.057258	0.117455	0.132283	0.168886	0.127426	0.568868
chr2L_248114_249586	chr2L_248114_249586	1	-0.013455	-0.03042	-0.025152	0.231473	0.259921	0.268255	0.370368	0.301804	0.200972	0.047733	0.572185	0.487873	0.239352	0.141868	0.076134	0.091513	0.25833	0.227557	0.355315	0.20661	0.235114	0.15234	0.145471	0.177226	0.181886	0.231083	0.249453	0.066512	0.060221	0.019578	0.052608	0.0446	-0.025139	-0.060421	0.032915	0.008936	0.013018	-0.05497	-0.002927	0.102917	0.052118	0.068851	0.045533	0.05042	0.131711	-0.029754	1.75561
chr2L_2886340_2887113	chr2L_2886340_2887113	1	-0.041115	-0.060214	0.362704	0.053484	0.28861	0.407974	0.346196	0.368257	0.229343	0.097663	0.374111	0.381177	0.1865	0.114266	0.117443	0.196137	0.219401	0.302718	0.134485	0.103573	0.092986	0.16709	0.183495	0.155868	0.134693	0.235165	0.146789	0.019421	0.10731	0.028993	0.043279	0.210322	-0.017897	-0.060502	-0.084485	0.08533	0.008334	-0.019362	0.040539	0.018006	0.030885	0.042024	0.042224	0.076349	0.020838	-0.042284	1.55077
chr2L_3478064_3478607	chr2L_3478064_3478607	1	-0.364927	-0.04814	-0.062084	-0.030831	0.098255	0.278252	0.328744	0.365862	0.118806	0.180077	0.085319	0.033112	0.157602	0.085386	0.122623	0.131419	0.166364	0.148307	0.268809	0.235518	0.223646	0.260821	0.256252	0.359429	0.262026	0.291611	0.168387	0.072552	0.119168	0.042779	0.043023	-0.012211	0.01432	-0.057278	-0.033457	0.113079	0.01366	-0.051316	0.079921	-0.001918	0.062164	0.062919	0.027338	0.083958	0.006476	-0.107489	0.82658
chr2L_4197351_4197570	chr2L_4197351_4197570	1	-0.341468	-0.267582	-0.129227	0.035578	0.106439	0.224901	0.295391	0.187082	0.180683	-9.2e-05	0.064081	0.309062	0.203977	0.070166	-0.010421	-0.032959	0.165445	0.06632	0.166322	0.064976	0.066854	0.036312	0.004847	-0.029218	0.145095	0.136396	0.05824	0.025579	0.05762	0.004965	0.013612	0.174264	-0.060987	-0.149545	-0.187857	-0.103696	-0.014639	-0.076187	-0.065019	-0.018831	-0.06445	-0.013664	0.046757	0.014642	-0.022925	-0.327038	1.30924
chr2L_484552_485098	chr2L_484552_485098	1	-0.021807	-0.149491	-0.000465	-0.027749	-0.016897	0.371859	0.319669	0.485283	0.438403	0.245526	0.123235	0.089793	0.086605	0.02576	0.056028	0.235487	0.258465	0.194108	0.210966	0.274826	0.244261	0.156359	0.118046	0.419348	0.188239	0.301193	0.199376	0.070024	0.107537	0.02861	-0.012985	-0.089676	-0.124908	0.054426	0.05337	0.195228	0.003741	0.010794	0.129764	0.048035	0.060247	-0.029899	0.030823	0.107034	0.194614	0.037668	-0.018616
chr2L_4997404_4998055	chr2L_4997404_4998055	1	-0.38419	-0.228671	0.075279	0.030477	0.151694	0.352675	0.243566	0.315436	0.296128	0.150482	0.202092	0.108162	0.253547	0.427993	0.498091	0.153925	0.184811	0.248901	0.211403	0.299665	0.294388	0.219319	0.059007	0.237154	0.210739	0.359446	0.29587	0.432229	0.118427	0.030337	-0.003586	-0.164397	-0.034575	-0.104069	-0.145409	-0.028273	-0.001806	-0.070686	-0.017484	0.06926	0.064733	0.328789	0.187355	0.110824	0.220367	0.218142	0.072816
chr2L_521667_522484	chr2L_521667_522484	1	-0.306679	-0.294867	0.123605	0.107384	0.224693	0.366	0.207287	0.381122	0.176273	0.212993	0.073667	0.036144	0.081003	0.037915	0.081049	0.293759	0.271731	0.262495	0.357628	0.364155	0.261136	0.174955	0.235627	0.337709	0.294686	0.291715	0.240391	0.121047	0.131584	-0.021446	0.00382	-0.136552	-0.162405	-0.01868	-0.034984	-0.131069	0.002924	-0.04598	-0.033388	0.043484	0.044625	0.037585	-0.01777	0.059927	0.221379	-0.184219	0.495967
chr2L_5292272_5293323	chr2L_5292272_5293323	1	-0.188242	0.126324	0.002163	-0.064839	0.062875	0.271371	0.219594	0.315116	0.221907	0.245097	0.126261	0.060813	0.097147	0.063452	0.432154	0.130353	0.178629	0.257408	0.291946	0.36074	0.136333	0.1964	0.088094	0.417333	0.408831	0.181255	0.187413	0.152495	0.227934	0.0738	0.064743	-0.017718	0.025384	0.009235	-0.135107	0.2038	0.01863	0.024669	0.063645	0.052291	0.048396	0.078285	0.053285	0.091151	0.290359	0.130221	-0.010984
chr2L_5294477_5295365	chr2L_5294477_5295365	1	-0.195921	-0.179237	0.032138	-0.040003	0.093191	0.252767	0.244745	0.383332	0.239897	0.202534	0.178042	0.035039	0.089977	0.045328	0.186867	0.129132	0.17725	0.241249	0.250326	0.492391	0.200866	0.220896	0.148966	0.29437	0.194806	0.297055	0.182016	0.137559	0.129243	0.082135	0.014687	-0.068311	0.003221	0.095472	0.006441	0.021856	0.008689	-0.029313	0.004278	0.082535	0.046788	0.036019	0.09549	0.047251	0.027746	-0.144261	-0.367128
chr2L_5907327_5907471	chr2L_5907327_5907471	1	-0.796844	-0.457796	-0.353637	0.03568	-0.110347	0.259184	0.194337	0.125311	0.05391	-0.099477	0.26293	0.639449	0.412655	0.282237	0.019343	0.089355	0.279132	0.12222	0.104747	0.279037	0.190746	0.044941	0.150532	-0.136433	0.122945	0.16864	0.116543	0.021857	0.006711	-0.084669	-0.043431	0.468204	-0.287401	-0.429538	-0.410346	-0.518243	-0.023587	-0.142419	-0.1757	0.006129	-0.017438	-0.005965	0.14184	0.027865	0.010534	-0.120818	1.93876
chr2L_5977420_5977968	chr2L_5977420_5977968	1	-0.204136	-0.047425	0.086434	0.100977	0.406617	0.359352	0.557965	0.436719	0.445935	0.228584	0.366093	0.151034	0.082372	0.080753	-0.013053	0.112612	0.106426	0.120416	0.087818	0.16028	0.101152	0.13488	0.072472	0.108875	0.116332	0.110143	0.158613	0.022611	0.074392	0.042408	0.046029	-0.060645	0.007384	0.023202	-0.128429	0.023585	0.021145	-0.051975	0.019123	0.013034	-0.032015	0.059975	-0.019407	0.064262	0.076719	-0.011511	1.27458
chr2L_5979776_5981158	chr2L_5979776_5981158	1	0.02832	0.049803	-0.01814	0.413725	0.33569	0.435384	0.579007	0.379468	0.175433	0.163058	0.853667	0.804506	0.554754	0.526092	0.197682	0.181391	0.226626	0.253884	0.235866	0.29971	0.184158	0.18937	0.194825	0.082559	0.051697	0.184059	0.21694	0.083391	0.117545	0.042324	0.040901	0.229896	-0.012583	0.084215	-0.001394	0.158669	0.032321	0.036313	0.116871	0.063887	0.060271	0.059039	0.068257	0.146917	0.254735	0.091427	1.81652
chr2L_6786645_6788106	chr2L_6786645_6788106	1	-0.163356	-0.080994	0.13129	0.031112	-0.010462	0.138239	0.352817	0.21675	0.155382	0.091187	0.075213	0.102587	0.118899	0.040687	0.463666	0.121013	0.112286	0.17965	0.137561	0.271539	0.135455	0.176109	0.149944	0.23263	0.245673	0.173661	0.180537	0.07438	0.194805	0.00871	0.033514	0.171865	-0.034381	0.028532	0.019946	0.182204	0.0141	0.023438	0.102361	0.091886	0.037585	0.03092	0.114019	0.028506	0.07584	0.025426	1.12349
chr2L_7809600_7809822	chr2L_7809600_7809822	1	-0.470018	-0.283083	0.06657	0.07017	0.136476	0.272354	0.298714	0.233312	0.185888	0.082097	0.144061	0.419945	0.253824	0.161699	0.010041	0.044826	0.286478	0.179605	0.166537	0.271891	0.162848	0.263617	0.115838	0.073927	0.142933	0.225687	0.18583	-0.007415	0.088944	0.031496	0.036984	0.168868	-0.116831	-0.183979	-0.146858	-0.178407	-0.005564	-0.06776	-0.062745	0.342753	-0.034346	-0.053943	0.158869	0.082563	0.020668	-0.014466	0.887534
chr2L_866961_867162	chr2L_866961_867162	1	-0.357335	-0.203481	0.091723	-0.022502	0.152676	0.258928	0.261361	0.423409	0.597233	0.218934	0.057003	0.128247	0.09534	0.026679	0.02703	0.151133	0.250126	0.174901	0.164719	0.141668	0.101834	0.098445	0.00126	0.227122	0.218314	0.195382	0.096856	0.052015	0.153841	0.041148	0.030913	0.109194	-0.055975	-0.002206	-0.197111	0.014446	0.017425	0.008493	0.013056	0.093784	-0.049142	0.007057	0.040698	0.055112	0.114924	-0.000946	1.21658
chr2L_8708886_8709705	chr2L_8708886_8709705	1	-0.113377	-0.171396	0.141044	0.108786	0.183652	0.376247	0.387724	0.265075	0.200569	0.135145	0.154702	0.423797	0.628192	0.542908	0.077174	0.069107	0.19351	0.321032	0.241836	0.295449	0.425027	0.145386	0.166618	0.103616	0.193679	0.232691	0.13409	0.09354	0.059191	0.031232	0.011051	0.18019	0.124714	-0.023702	-0.117112	-0.035777	0.002367	-0.033458	0.009176	0.122555	0.022387	0.088544	0.276269	0.064845	-0.003163	0.03098	1.27745
chr2L_9908560_9908788	chr2L_9908560_9908788	1	-0.286307	-0.338438	-0.061675	0.045908	0.094174	0.231721	0.326277	0.187404	0.267321	0.048012	0.148157	0.197582	0.068522	-0.006558	0.115163	0.015411	0.14255	0.062312	0.143001	0.098109	0.10213	0.06889	0.090178	-0.006031	0.077277	0.092443	0.034884	-0.026916	0.03515	-0.022238	-0.026012	0.101758	0.150938	-0.173079	-0.297572	-0.12262	-0.013267	-0.100525	-0.042399	0.017556	0.019141	-0.016311	0.197019	0.019527	0.046319	-0.138253	1.07168
chr2R_11024871_11025404	chr2R_11024871_11025404	1	-0.165099	-0.132516	0.142289	-0.02741	0.093015	0.370544	0.214596	0.52473	0.427518	0.235235	0.084434	0.071057	0.056286	0.000145	0.109459	0.00133	0.228633	0.270608	0.266023	0.427342	0.515688	0.116399	0.09104	0.418089	0.289855	0.239523	0.146761	0.072519	0.217518	0.063583	0.065277	0.057685	0.06475	0.031944	-0.078515	0.194072	0.025437	0.009108	0.031007	0.081933	0.012201	0.026403	0.093381	0.035691	0.095064	-0.070636	-0.117799
chr2R_11209912_11210783	chr2R_11209912_11210783	1	-0.27366	-0.16525	-0.095667	0.215603	0.353079	0.453555	0.557434	0.513737	0.392975	0.212008	0.306149	0.773424	0.438276	0.270845	0.178882	0.054544	0.338503	0.410399	0.217491	0.265416	0.115801	0.115753	0.151912	0.004629	0.244056	0.205581	0.200812	0.078591	0.087533	0.064895	0.11341	0.082955	-0.020656	0.022078	-0.132016	0.038673	0.000578	-0.020697	0.03388	0.080654	-0.031869	-0.013372	0.178724	0.067954	0.235851	-0.037829	1.81745
chr2R_11991862_11992101	chr2R_11991862_11992101	1	-0.284964	-0.184687	0.025952	0.267732	0.214803	0.381689	0.499047	0.429438	0.491932	0.241988	0.093357	0.147516	0.132341	-0.007919	0.029035	0.084002	0.199182	0.139612	0.141632	0.196212	0.100945	0.146785	0.088856	0.069194	0.130945	0.186571	0.110367	0.066732	0.080781	0.068572	-0.005425	-0.047519	0.05201	-0.014307	-0.149596	0.032198	0.003233	-0.004987	0.024388	0.039341	-0.021966	0.02961	0.116296	0.092558	0.163726	-0.109074	1.30574
chr2R_12915811_12916009	chr2R_12915811_12916009	1	-0.427575	-0.278567	0.038792	0.22614	0.143117	0.306009	0.291248	0.123107	0.067738	-0.013188	0.157775	0.283658	0.079813	0.049923	0.082656	0.099541	0.195295	0.1321	0.137665	0.204479	0.177231	0.062529	0.028358	-0.049551	0.14677	0.412222	0.307477	0.076128	0.125819	-0.071614	0.010347	0.133029	-0.143854	-0.207779	-0.222036	-0.410098	-0.005701	-0.097623	-0.134974	0.039859	-0.021818	0.071844	0.099701	0.021226	0.023733	-0.032155	1.49031
chr2R_13756590_13757211	chr2R_13756590_13757211	1	-0.212615	-0.199226	-0.182948	0.006705	0.189664	0.461278	0.358903	0.284221	0.153537	0.048115	0.54109	0.514975	0.291483	0.153588	0.12234	0.141394	0.247735	0.21637	0.274839	0.443175	0.240187	0.287255	0.174316	0.035063	0.397801	0.702384	0.607203	0.127727	0.20256	0.120896	0.276714	0.165033	0.112312	-0.302891	-0.093735	-0.233639	-0.00208	-0.157181	-0.100382	0.053867	0.076803	0.046342	0.204286	0.055761	-0.029781	-0.347505	1.78422
chr2R_14044140_14045086	chr2R_14044140_14045086	1	-0.149647	-0.219055	-0.09465	0.121453	0.375071	0.383501	0.629647	0.503416	0.526053	0.169018	0.318609	0.400114	0.196323	0.15473	0.423534	0.095295	0.354088	0.321354	0.151191	0.328174	0.164565	0.061995	0.187511	0.044767	0.191658	0.478275	0.504669	0.099211	0.162973	0.036334	0.082901	0.262439	0.157061	-0.026504	-0.10747	-0.019605	0.02124	-0.032223	0.053561	0.091031	0.06835	0.129107	0.237587	0.091896	0.154809	-0.035855	1.70688
chr2R_14244655_14245436	chr2R_14244655_14245436	1	-0.309755	-0.105721	0.133357	0.053522	0.031313	0.290449	0.253403	0.241767	0.093982	0.053319	0.122249	0.176172	0.319076	0.317359	0.289729	0.16014	0.179868	0.196393	0.285014	0.296349	0.253152	0.201532	0.214706	0.457106	0.299774	0.425601	0.372124	0.094327	0.184138	0.089233	0.15072	0.025361	-0.109135	-0.138879	-0.045512	-0.065691	0.012573	-0.044199	-0.029142	-0.012207	0.303599	0.292473	0.13708	0.070958	0.104105	-0.106697	1.40498
chr2R_14690129_14690408	chr2R_14690129_14690408	1	-0.63661	-0.038519	-0.195648	-0.215894	-0.103287	0.248791	0.178584	0.241273	-0.007487	0.046436	0.142096	0.016819	0.121245	0.004658	0.075708	0.093503	0.013212	0.124937	0.158896	0.345656	0.1047	0.080168	0.051071	0.275554	0.250503	0.235004	0.12036	0.052706	0.197896	0.067996	0.114742	-0.231084	-0.053018	-0.044919	-0.218914	-0.136796	-0.017533	-0.035667	-0.020415	0.032885	0.068527	0.025688	0.010692	0.030187	0.183101	-0.107204	0.128504
chr2R_15344227_15344819	chr2R_15344227_15344819	1	-0.10258	-0.029745	0.028509	0.286509	0.195781	0.331029	0.364191	0.279871	0.128955	0.062036	0.20577	0.414403	0.383316	0.356564	0.084686	0.123531	0.368052	0.342766	0.135681	0.199901	0.318068	0.073319	0.16921	0.011665	0.146745	0.412381	0.462616	0.074404	0.095481	0.005382	0.03011	0.135168	0.094831	-0.091703	-0.051822	-0.062887	0.017354	-0.048774	-0.062085	0.022227	0.021797	0.096498	0.096027	0.088074	-0.04156	-0.036421	1.68099
chr2R_15350805_15351275	chr2R_15350805_15351275	1	-0.418266	-0.337663	0.269516	0.211365	0.260501	0.377842	0.359859	0.247722	0.294983	0.158616	0.176364	0.082593	0.123923	0.131852	0.069691	0.06264	0.303931	0.342627	0.239216	0.215579	0.197994	0.195598	0.130243	0.193662	0.188013	0.239248	0.07999	0.039625	0.097377	0.013319	0.030186	-0.100046	-0.040417	-0.116165	-0.187821	-0.277943	-0.004897	-0.083219	-0.096208	0.01432	-0.055031	0.007176	0.017032	0.102572	0.140197	-0.182428	0.447348
chr2R_15354572_15355939	chr2R_15354572_15355939	1	-0.121758	-0.039736	0.39935	0.202719	0.214708	0.473523	0.412955	0.497302	0.370512	0.183574	0.104901	0.076179	0.183453	0.162018	0.128599	0.135331	0.282714	0.243376	0.318939	0.347909	0.278361	0.162534	0.145637	0.293557	0.508611	0.233727	0.133879	0.076955	0.246687	0.013792	0.053147	-0.030155	0.065159	0.049229	-0.069684	0.178079	0.013216	0.026467	0.082917	0.080645	0.020533	0.021201	0.176545	0.103487	0.368843	0.230378	1.3527
chr2R_17393458_17393627	chr2R_17393458_17393627	1	-0.312911	-0.351192	0.027472	0.020165	0.052683	0.286805	0.225779	0.382863	0.258429	0.172329	0.118491	0.054714	0.100533	0.006659	-0.020991	0.130708	0.21599	0.256301	0.270736	0.348263	0.231823	0.134076	-0.003102	0.268067	0.17931	0.229097	0.178131	0.052433	0.108194	-0.039523	-0.043	-0.278611	-0.127251	-0.093457	-0.246123	-0.395002	-0.001189	-0.14344	-0.181836	0.052153	-0.03257	-0.042649	-0.041518	0.056561	-0.080975	-0.273069	0.033088
chr2R_17600539_17601845	chr2R_17600539_17601845	1	-0.153635	-0.12266	0.170527	0.180045	0.335507	0.51575	0.727068	0.475277	0.28932	0.149511	0.109301	0.220133	0.181873	0.090837	0.068836	0.160093	0.189241	0.152817	0.286806	0.292534	0.108547	0.151416	0.252844	0.251493	0.202188	0.615555	0.515787	0.15076	0.021932	0.031582	0.043089	0.155762	-0.082583	-0.020052	-0.014089	0.080287	0.005222	0.013942	0.048137	0.097652	0.081087	0.066401	0.104615	0.062641	0.094409	0.064786	1.5685
chr2R_18568284_18568703	chr2R_18568284_18568703	1	-0.544778	-0.229663	0.171297	-0.092131	0.107195	0.326852	0.211883	0.385937	0.188991	0.191681	0.066007	0.069138	0.054084	-0.022514	0.143758	0.113212	0.193833	0.193776	0.266892	0.502549	0.381993	0.239159	0.24954	0.31716	0.32879	0.269373	0.204124	0.060387	0.215821	0.044828	0.06146	-0.068021	-0.13595	-0.029358	-0.165194	-0.112307	-0.00575	-0.023306	-0.018915	0.107497	-0.009908	0.061645	-0.041594	0.083243	0.211191	0.020156	-0.471369
chr2R_20680718_20681443	chr2R_20680718_20681443	1	-0.049401	-0.014867	0.014008	0.150284	0.230804	0.306294	0.338861	0.221023	0.134891	0.066368	0.187313	0.254218	0.12999	0.049034	0.393789	0.126162	0.303809	0.44795	0.310415	0.465518	0.465749	0.154484	0.241755	0.133569	0.272486	0.264416	0.208087	0.166643	0.162863	0.066812	0.123205	0.172181	-0.046473	0.027891	-0.006174	0.165144	0.004085	-0.007048	0.071852	0.141138	0.036296	0.076052	0.261272	0.120681	0.083125	0.06489	0.993183
chr2R_20830216_20830426	chr2R_20830216_20830426	1	-0.335687	-0.21863	-0.024652	-0.01464	0.071677	0.242308	0.304117	0.233631	0.076793	0.094906	0.131808	0.17975	0.058143	0.030175	0.410721	0.120544	0.175309	0.24121	0.2201	0.282551	0.207697	0.192876	0.009358	0.0834	0.212398	0.225252	0.13988	0.036989	0.183229	-0.078101	0.080914	-0.068706	-0.019902	-0.148185	-0.174855	0.016981	-0.004536	-0.087396	-0.049904	0.02491	0.051077	0.01809	0.027813	0.060633	-0.104037	-0.37459	0.257784
chr2R_2129411_2129768	chr2R_2129411_2129768	1	-0.292269	-0.110965	-0.08427	0.051304	0.046464	0.222664	0.299043	0.242336	0.154476	-0.016287	0.330084	0.509945	0.328152	0.262094	0.057892	0.065532	0.18309	0.138073	0.094359	0.186247	0.337302	0.177226	0.21971	-0.014151	0.078492	0.279582	0.094578	0.049574	-0.044478	-0.056108	0.018256	0.247436	-0.026062	-0.127005	-0.193013	-0.006281	0.008197	-0.090841	0.012921	0.268835	-0.003558	-0.06181	0.081858	-0.014781	-0.080542	-0.202258	0.821053
chr2R_2518975_2519197	chr2R_2518975_2519197	1	-0.350177	-0.275667	0.01429	0.264519	0.430794	0.396912	0.400914	0.359679	0.289433	0.186868	0.147665	0.255402	0.147947	0.043122	0.13443	0.091371	0.257731	0.189912	0.200527	0.129768	0.468635	0.195476	0.034457	0.016942	0.093367	0.317996	0.140065	0.041399	0.051294	-0.043553	-0.030433	0.017687	0.074711	-0.077801	-0.237875	-0.184837	-0.004916	-0.083551	0.014348	-0.0174	-0.026846	0.049332	0.010101	-0.015106	0.027101	-0.20219	1.43031
chr2R_2519736_2520716	chr2R_2519736_2520716	1	-0.07491	0.029799	-0.010428	0.171023	0.188987	0.329713	0.441657	0.295837	0.194298	0.029457	0.774436	0.660025	0.433433	0.333763	0.151738	0.082515	0.292071	0.304083	0.157346	0.306415	0.226621	0.470848	0.153347	0.013156	0.140403	0.175679	0.232868	0.065616	0.096342	0.005704	0.108016	0.166577	0.06209	0.023003	0.128787	0.024348	0.024056	-0.012955	0.027295	0.25697	0.038412	0.042858	0.13595	0.065939	0.173702	0.02552	1.79023
chr2R_5326684_5326952	chr2R_5326684_5326952	1	-0.450525	-0.304206	0.025185	0.190796	0.067019	0.175882	0.309135	0.4337	0.228065	0.23057	0.180442	0.095834	0.119362	0.045189	0.107095	0.166599	0.289299	0.305147	0.346131	0.258853	0.147624	0.167022	-0.156688	0.197491	0.275149	0.247401	0.17129	0.052683	0.103328	0.003062	0.018941	-0.141246	-0.091748	-0.079126	-0.286468	-0.156249	-0.005771	-0.124268	-0.073974	-0.076608	-0.076239	-0.024572	0.277053	0.028783	0.174507	-0.178149	0.160952
chr2R_5328196_5329309	chr2R_5328196_5329309	1	-0.290841	-0.244268	-0.007386	0.353965	0.227144	0.420565	0.450837	0.308431	0.172693	0.13459	0.16866	0.104652	0.20383	0.073637	0.362704	0.130863	0.242354	0.349223	0.273913	0.304354	0.216383	0.204326	0.233715	0.06594	0.278936	0.255777	0.248312	0.102562	0.152084	0.052545	0.097106	-0.045504	-0.048017	-0.019204	0.007884	0.079333	0.01834	-0.014723	0.005848	0.06671	0.071298	0.065527	0.074831	0.063803	0.2102	0.092939	1.87828
chr2R_5599632_5600000	chr2R_5599632_5600000	1	-0.186261	-0.133348	-0.096703	-0.048105	0.061858	0.559375	0.5204	0.277919	0.193486	-0.013504	0.114587	0.36132	0.142568	0.090224	0.221678	0.043357	0.154888	0.200731	0.165283	0.176376	0.19264	0.122719	0.189776	-0.005298	0.194894	0.239157	0.118888	0.088358	0.129432	-0.005195	0.026109	0.208346	0.061929	-0.265194	-0.144344	0.019068	-0.008799	-0.0616	-0.010841	0.067065	0.032868	0.039797	0.063713	0.016136	-0.138049	-0.263698	1.48769
chr2R_6011298_6011845	chr2R_6011298_6011845	1	-0.296967	-0.222743	-0.092974	-0.054825	0.047964	0.175781	0.20565	0.201198	0.120896	-0.024058	0.125219	0.295462	0.1228	0.017044	0.070675	0.21354	0.198164	0.155304	0.526404	0.237202	0.09669	0.384172	0.239619	0.104942	0.132521	0.108958	0.123891	0.043291	0.073617	-0.009304	-0.005493	0.318358	-0.058999	-0.211352	-0.095296	0.016703	-0.000256	-0.073768	0.049811	0.089679	0.012638	-0.016369	0.076447	0.084244	-0.07099	-0.199872	1.11152
chr2R_6317422_6318356	chr2R_6317422_6318356	1	-0.405128	-0.164361	-0.038421	0.220775	0.342531	0.499495	0.558371	0.522477	0.383489	0.147744	0.521226	0.493327	0.293393	0.143501	0.094002	0.052788	0.45506	0.148215	0.184814	0.257575	0.338078	0.091109	0.11656	0.257518	0.226243	0.194694	0.153373	0.051513	0.221778	-4.4e-05	0.14399	0.227064	0.411219	0.006803	-0.042869	-0.043918	0.051948	-0.039669	0.032176	0.162088	0.017017	0.01752	0.258092	0.072598	0.506596	0.387453	1.61465
chr2R_6421575_6421971	chr2R_6421575_6421971	1	-0.443964	-0.450853	-0.107139	0.12215	0.203584	0.309482	0.333174	0.284182	0.101744	0.079785	0.021673	0.01615	0.138847	-0.035747	0.020048	0.135562	0.256714	0.318602	0.232934	0.168826	0.06769	0.093976	0.148326	0.032351	0.303298	0.26242	0.148156	0.02505	0.029206	-0.030519	-0.022369	-0.318053	0.059826	-0.194618	-0.22591	-0.155021	-0.002786	-0.117561	-0.051003	-0.021209	-0.054854	-0.055064	0.105286	0.072051	-0.006101	-0.32266	1.33267
chr2R_6422068_6423048	chr2R_6422068_6423048	1	-0.106013	-0.096243	0.373253	0.216351	0.363557	0.62409	0.553486	0.492843	0.223711	0.113896	0.055036	0.016693	0.133542	0.021567	0.132111	0.262332	0.318941	0.219951	0.355018	0.293534	0.216328	0.247175	0.243998	0.338886	0.38282	0.286519	0.171637	0.073989	0.085098	0.035129	0.05723	-0.148457	-0.091442	-0.07764	0.012787	0.019093	0.013755	0.007934	0.008051	0.08568	0.020636	0.01784	0.041982	0.091633	0.18386	0.144585	1.37549
chr2R_6427948_6428352	chr2R_6427948_6428352	1	-0.295283	-0.29329	0.025927	0.193919	0.378507	0.265967	0.436899	0.443135	0.336153	0.139994	0.119657	0.099645	0.144805	0.079045	0.088747	0.125213	0.226057	0.076545	0.09881	0.17697	0.101133	0.137666	0.29537	0.063198	0.057264	0.607115	0.482527	0.048466	-0.011173	0.017762	-0.081241	-0.114002	-0.069805	-0.094467	-0.035644	-0.117086	-0.01661	-0.030974	-0.05364	0.054658	0.022119	0.030964	-0.066416	0.017629	-0.059718	-0.309479	0.734968
chr2R_6428867_6430126	chr2R_6428867_6430126	1	-0.351753	-0.174568	0.165783	0.189423	0.26024	0.22852	0.439172	0.323121	0.241308	0.111302	0.114192	0.188046	0.146155	0.011099	0.306787	0.183059	0.217728	0.312598	0.200118	0.298776	0.228824	0.226987	0.270831	0.281999	0.199126	0.397295	0.288612	0.083155	0.058875	0.010358	-0.011639	0.018393	0.09419	-0.011242	-0.041539	-0.075787	0.004186	-0.043362	0.000102	0.098824	0.07953	0.023143	0.089948	0.10647	0.121017	0.077125	0.831821
chr2R_6453920_6454754	chr2R_6453920_6454754	1	-0.228691	-0.174876	0.175025	0.097969	0.388245	0.127577	0.112357	0.322742	0.160022	0.124687	0.106082	0.099112	0.03947	0.022643	0.356909	0.184336	0.164314	0.162967	0.13054	0.116327	0.150486	0.229268	0.222431	0.409248	0.162599	0.558882	0.550101	0.072861	0.083703	0.067947	0.110754	-0.009183	-0.068782	0.027284	0.082386	0.083538	0.03385	0.015669	0.110021	0.061644	0.012997	0.042501	0.043772	0.062385	0.187991	0.160075	0.222725
chr2R_7089685_7091633	chr2R_7089685_7091633	1	-0.129985	-0.134251	-0.07449	-0.015983	0.003315	0.160278	0.128711	0.232503	0.126678	0.072435	0.193351	0.246506	0.180395	0.084402	0.365955	0.165456	0.160103	0.337196	0.299113	0.356932	0.224222	0.229641	0.268935	0.22029	0.324629	0.371721	0.266378	0.102754	0.301957	0.053285	0.100026	-0.045525	0.014163	-0.056481	-0.074305	0.039506	0.003888	-0.004461	0.033392	0.080011	0.05169	0.078045	0.10342	0.24652	0.101107	-0.078798	0.294781
chr2R_7488872_7489517	chr2R_7488872_7489517	1	-0.560031	-0.380329	0.281762	-0.047975	-0.052325	0.258037	0.140989	0.343085	0.2082	0.1756	0.300554	0.256766	0.199778	0.09041	0.535735	0.386375	0.330815	0.40501	0.331976	0.272082	0.310196	0.317627	0.200893	0.311439	0.53829	0.511691	0.455813	0.190311	0.503863	0.040634	0.118556	-0.212686	-0.092743	-0.141862	-0.116439	0.022045	-0.007789	-0.049013	0.081287	0.08588	0.035952	0.078416	0.070722	-0.003458	0.200655	0.00071	0.109652
chr2R_7490665_7491289	chr2R_7490665_7491289	1	-0.502172	-0.214609	0.135888	0.027974	0.090257	0.234888	0.155508	0.302732	0.086008	0.087396	0.14697	0.064637	0.158507	0.085208	0.101811	0.178757	0.306634	0.375657	0.301426	0.413597	0.269672	0.291646	0.284121	0.256481	0.321835	0.412713	0.351025	0.185174	0.299909	0.058978	0.089016	-0.225826	-0.235105	2.4e-05	-0.267392	-0.010251	0.01026	-0.017485	-0.003836	0.122569	0.053494	0.055103	0.037049	0.120881	0.188841	-0.005578	0.74075
chr2R_7492282_7493003	chr2R_7492282_7493003	1	-0.145397	-0.043799	0.432054	0.141535	0.134662	0.361525	0.27536	0.333061	0.238545	0.16734	0.115603	0.037431	0.073629	0.035542	0.126692	0.145971	0.177305	0.146034	0.281918	0.254587	0.188372	0.21768	0.050247	0.299959	0.554823	0.22225	0.124135	0.10583	0.210796	0.042928	0.025668	-0.09503	-0.094916	0.046464	-0.025755	-0.002349	0.004231	0.001005	-0.02753	0.058853	0.065244	0.054209	0.022558	0.112357	0.213206	0.118463	1.0234
chr2R_8476514_8477557	chr2R_8476514_8477557	1	-0.295231	-0.189908	-0.125265	0.204031	0.325346	0.412609	0.568475	0.388238	0.215681	0.080845	0.227972	0.426273	0.26301	0.185583	0.188656	0.109161	0.256649	0.171638	0.165227	0.217615	0.128596	0.140327	0.132914	-0.018802	0.197244	0.496023	0.448803	0.084428	0.069777	0.051523	0.028497	0.04309	0.107226	-0.009668	-0.043745	0.018486	0.019742	-0.046112	0.048259	0.092334	0.006659	0.035261	0.75872	0.126577	0.036687	-0.11145	1.8594
chr2R_8619583_8620415	chr2R_8619583_8620415	1	0.025451	0.038449	0.094671	0.108437	0.098843	0.255109	0.27376	0.343907	0.312543	0.229559	0.081745	0.073107	0.08749	0.073928	0.238946	0.148757	0.149211	0.18495	0.129516	0.299821	0.195737	0.272674	0.291715	0.271111	0.251137	0.205634	0.202445	0.080591	0.177689	0.075662	0.036776	-0.081577	0.080401	0.065016	-0.002907	0.206225	0.027916	0.022701	0.062626	0.076039	0.055721	0.048394	0.076492	0.042367	0.057809	-0.032181	-0.213265
chr2R_8922460_8923206	chr2R_8922460_8923206	1	-0.197049	0.00013	0.252876	-0.109122	0.03546	0.200397	0.185741	0.220765	0.038958	0.125553	0.103948	0.025303	0.102537	0.02669	0.338043	0.208273	0.185661	0.325237	0.210796	0.284245	0.260824	0.30017	0.162423	0.249174	0.752361	0.562285	0.398318	0.200688	0.491485	0.404504	0.569444	-0.089685	0.057908	-0.009891	-0.094856	0.16899	0.015297	-0.018889	0.073831	0.09943	0.067435	0.017467	0.038638	0.051078	0.068741	-0.128331	-0.225432
chr2R_9224063_9225352	chr2R_9224063_9225352	1	-0.141337	-0.045118	-0.025944	0.252617	0.247738	0.610735	0.600082	0.355316	0.286797	0.177079	0.124951	0.120249	0.374103	0.056744	0.078189	0.146526	0.285746	0.313758	0.357917	0.37865	0.228421	0.176159	0.447728	0.11037	0.329569	0.28122	0.195781	0.108134	0.244183	0.085981	0.082577	-0.028775	0.013476	-0.04813	-0.074664	0.027796	0.010144	-0.014669	0.050929	0.118881	0.024157	0.066174	0.079888	0.082301	0.158245	0.050407	1.4834
chr2R_9844775_9845870	chr2R_9844775_9845870	1	-0.404872	-0.240956	-0.093942	-0.001771	0.197481	0.443311	0.416808	0.346391	0.160122	0.034237	0.214484	0.558143	0.453255	0.559584	0.130989	0.07345	0.327033	0.269156	0.182539	0.359135	0.287843	0.17958	0.12708	0.215475	0.2872	0.491051	0.271262	0.091225	0.159859	-0.031415	0.0529	0.142922	0.300158	-0.175116	-0.231089	0.035752	0.007494	-0.07242	0.048575	0.034433	0.094409	0.377363	0.275266	0.041729	0.144336	-0.006824	1.31267
chr2R_9895671_9896991	chr2R_9895671_9896991	1	-0.129443	-0.106105	0.187323	0.018305	0.050522	0.216896	0.159897	0.309061	0.076014	0.144065	0.120678	0.065694	0.042151	0.032005	0.16464	0.109786	0.172541	0.220335	0.216318	0.24019	0.166471	0.154809	0.119207	0.340309	0.180456	0.257821	0.237899	0.059076	0.131116	0.066915	-0.012123	-0.12073	-0.096241	0.054154	-0.049438	0.100131	0.020231	0.010407	0.053414	0.071332	0.015331	0.044357	0.043028	0.06383	0.257639	0.139363	0.027232
chr3L_1006251_1006641	chr3L_1006251_1006641	1	-0.437234	-0.285021	-0.044196	0.176655	0.189444	0.376934	0.364794	0.393581	0.406681	0.25379	0.055806	0.063594	0.138468	0.02982	0.036959	0.079371	0.188005	0.245037	0.283881	0.26089	0.313242	0.019017	0.161748	0.211425	0.250089	0.250742	0.175272	0.031835	0.119087	-0.001812	0.027932	-0.192463	-0.045007	-0.060768	-0.347197	-0.231013	0.000355	-0.093338	-0.077412	0.014638	0.071666	0.069872	0.003284	0.089969	0.014766	-0.19215	1.17406
chr3L_10674911_10675226	chr3L_10674911_10675226	1	-0.275488	-0.118147	0.177935	0.015793	0.117258	0.324957	0.453566	0.405071	0.444732	0.188975	0.113122	0.060007	0.107356	0.066862	0.013012	0.124291	0.264684	0.250545	0.313317	0.280935	0.181171	0.1447	0.064097	0.366576	0.364221	0.202104	0.155994	0.133712	0.257376	0.026787	0.06856	-0.259054	-0.18294	0.127	-0.195298	0.105199	0.023867	0.01521	0.08151	0.006686	0.019549	-0.012282	0.055399	0.081033	0.358111	0.188187	0.017617
chr3L_10731341_10731718	chr3L_10731341_10731718	1	-0.551365	-0.174523	-0.193328	-0.243052	0.069383	0.196516	0.007116	0.337219	0.020205	0.073031	0.282717	0.030054	0.035982	-0.001434	0.20672	0.153027	0.146286	0.298337	0.211838	0.223826	0.096624	0.234576	0.107205	0.304313	0.249077	0.283872	0.240338	0.095105	0.292482	0.073593	0.099242	-0.148565	-0.19478	-0.147736	-0.131139	-0.045644	0.019278	-0.090125	-0.038598	0.011957	0.015759	0.073381	-0.040922	0.053859	-0.004476	-0.126896	-0.206717
chr3L_10733186_10733771	chr3L_10733186_10733771	1	-0.253334	-0.269713	0.053951	-0.145814	-0.150316	0.144003	0.087088	0.202046	0.100464	0.105965	0.124286	0.045367	0.084286	0.047161	0.117903	0.119992	0.171067	0.277701	0.207538	0.287082	0.151601	0.134936	0.302977	0.246695	0.446693	0.24514	0.237735	0.099775	0.381549	0.073415	0.20983	-0.209488	-0.131647	-0.011907	-0.273343	-0.025655	-0.008093	-0.035473	-0.008199	0.07153	0.022769	0.113477	0.023073	0.096252	0.241748	0.026687	-0.287215
chr3L_11285360_11285609	chr3L_11285360_11285609	1	-0.649383	-0.236127	0.146579	-0.058978	-0.059967	0.180016	0.149825	0.278455	0.198388	0.147183	0.072682	-0.002698	0.065238	0.057983	0.078137	0.190234	0.210526	0.222097	0.300218	0.248834	0.107165	0.267546	0.15474	0.292855	0.265288	0.191287	0.154215	0.107523	0.185681	0.043373	0.061837	-0.251206	-0.110993	-0.04714	-0.283114	-0.028243	0.006023	-0.019272	0.069291	0.039438	0.014059	-0.002489	-0.038449	0.015504	0.235147	0.040083	-0.060156
chr3L_12797542_12797723	chr3L_12797542_12797723	1	-0.239821	-0.258655	0.016709	0.205498	0.331206	0.34602	0.447041	0.224254	0.14843	0.080702	0.149354	0.328995	0.157105	0.058674	0.019827	0.068684	0.19973	0.117035	0.204518	0.288682	0.094015	0.030395	0.151608	0.117801	0.164278	0.170304	0.180104	0.050958	0.081697	0.008864	0.004647	0.103548	-0.100376	0.023916	-0.158381	-0.147579	0.002079	0.02087	0.046973	0.064999	0.010739	0.011886	0.008004	0.054482	0.266894	0.036231	1.62309
chr3L_1335288_1335552	chr3L_1335288_1335552	1	-0.250643	-0.155383	-0.220306	0.228177	0.174432	0.278603	0.49966	0.180695	0.191902	0.072575	0.113315	0.301389	0.140281	0.047424	0.187162	0.029951	0.215209	0.123948	0.130457	0.44576	0.136957	0.06042	0.218479	-0.040697	0.090027	0.192733	0.144501	0.06296	0.001359	-0.046932	-0.055332	0.128687	-0.169048	-0.09458	-0.05379	0.01668	-0.01216	-0.047678	-0.049767	0.057502	-0.012446	0.005225	0.056716	0.093013	0.033888	-0.090618	1.70098
chr3L_14031149_14031620	chr3L_14031149_14031620	1	-0.117644	-0.082189	-0.003326	0.268466	0.525553	0.653842	0.727426	0.594374	0.512154	0.248331	0.241239	0.376696	0.229628	0.026372	0.013352	0.153911	0.391353	0.131681	0.158176	0.282008	0.223886	0.008332	0.258664	0.039099	0.089735	0.276382	0.149542	0.106704	0.076211	0.008049	0.009617	0.196923	0.012338	-0.141452	-0.063941	-0.013096	-0.015856	-0.032205	-0.015421	0.061511	0.057151	0.056412	0.209803	0.074592	0.047516	-0.145864	1.6613
chr3L_14751859_14753537	chr3L_14751859_14753537	1	-0.02724	-0.03729	0.030049	0.032055	0.236558	0.177548	0.278432	0.236056	0.177218	0.073221	0.215539	0.163648	0.153535	0.028876	0.475739	0.165748	0.200131	0.447927	0.268038	0.267977	0.148746	0.244632	0.150331	0.174362	0.300781	0.258302	0.276725	0.084824	0.200387	0.03267	0.037687	0.062698	0.086428	-0.050608	0.090275	0.112144	0.011921	-0.017752	0.03702	0.081984	0.052866	0.019885	0.125922	0.138996	0.121064	-0.101381	0.418263
chr3L_15101146_15101885	chr3L_15101146_15101885	1	-0.022722	-0.030725	0.086349	0.028928	-0.001497	0.280324	0.310604	0.514338	0.565549	0.274957	0.207144	0.318278	0.105874	0.077164	0.221427	0.106461	0.248169	0.261047	0.148232	0.152871	0.260121	0.046541	0.057634	0.329838	0.170309	0.295141	0.244301	0.090556	0.119793	0.066255	0.05712	0.149394	0.122087	0.146392	0.000827	0.16132	0.019093	0.043647	0.031546	0.070915	0.07016	0.075844	0.109607	0.092643	0.229439	0.023935	0.955287
chr3L_15818752_15819398	chr3L_15818752_15819398	1	-0.326201	-0.196377	-0.033511	0.267209	0.347068	0.422762	0.491796	0.418383	0.126235	0.040232	0.484419	0.66037	0.381382	0.257461	0.216792	0.138228	0.332175	0.399397	0.241653	0.327926	0.280407	0.032512	0.092124	0.095157	0.414414	0.398832	0.38451	0.086041	0.118429	0.025069	0.052717	0.169046	0.064767	-0.126916	-0.175294	-0.125677	0.000175	-0.110862	-0.019114	0.043513	0.007652	0.041573	0.132805	0.060411	0.11381	-0.183914	1.63407
chr3L_16039784_16040101	chr3L_16039784_16040101	1	-0.182944	-0.214741	-0.033036	0.191693	0.181175	0.60023	0.562348	0.421042	0.256845	0.081345	0.184475	0.301687	0.225403	0.058202	0.080634	0.066225	0.136645	0.11272	0.303297	0.2992	0.139888	0.181928	0.368959	0.076614	0.199594	0.301523	0.189039	0.093174	0.060398	-0.010229	0.042118	0.036438	-0.089964	-0.163524	-0.217852	-0.100946	0.009194	-0.089451	-0.021056	0.044034	-0.00337	-0.005283	0.055169	0.003624	-0.164007	-0.35494	1.53039
chr3L_16045187_16046085	chr3L_16045187_16046085	1	-0.397515	-0.144684	0.118978	0.335319	0.335805	0.295688	0.340133	0.26365	0.059844	0.00399	0.580462	0.514298	0.41323	0.436821	0.13553	0.170421	0.247858	0.185331	0.157744	0.274949	0.164954	0.145328	0.151944	0.004342	0.219669	0.299858	0.297773	0.07285	0.125701	0.009775	0.090958	0.052308	-0.159057	-0.178853	-0.108475	-0.14029	0.004894	-0.089543	-0.016028	0.111737	0.016627	0.054127	0.039867	0.112435	0.065655	-0.028322	1.93181
chr3L_17005241_17005393	chr3L_17005241_17005393	1	-0.535723	-0.213532	-0.026958	0.020662	0.259361	0.304882	0.246948	0.138593	0.037568	0.029128	0.151534	0.356792	0.177721	0.146368	0.010442	0.084369	0.205128	0.10959	0.094581	0.108823	0.122801	0.134657	0.217164	0.010331	0.132687	0.304221	0.211152	0.063241	0.018821	-0.000996	-0.00625	0.05659	-0.117485	-0.307393	-0.059533	-0.150714	0.004116	-0.076402	-0.097703	-0.016456	-0.031016	-0.036764	0.049501	0.042824	-0.00405	-0.052653	1.471
chr3L_17570504_17571578	chr3L_17570504_17571578	1	0.023369	0.062602	0.049087	0.04248	-0.031818	0.194791	0.061853	0.176884	0.07922	0.121592	0.060229	0.03343	0.052457	0.094608	0.408997	0.174451	0.046716	0.213656	0.196786	0.156165	0.231628	0.150714	0.166858	0.271697	0.198535	0.182743	0.156126	0.070087	0.19822	0.075233	0.083619	-0.007522	-0.000794	0.021838	0.143659	0.250039	0.025815	0.034755	0.087104	0.053561	0.016742	0.040433	-0.001172	0.053719	0.053547	0.022497	-0.323621
chr3L_1794435_1794968	chr3L_1794435_1794968	1	-0.45938	-0.415217	-0.115604	0.362172	0.178341	0.290612	0.371986	0.323999	0.167493	0.036753	0.261022	0.344595	0.153164	0.06956	0.047875	0.107932	0.319177	0.161305	0.121524	0.243485	0.211973	0.118584	0.127894	-0.028963	0.043283	0.281348	0.190278	0.073222	-0.016065	0.0304	-0.077385	0.060414	-0.130559	-0.257254	-0.103112	-0.112369	-0.016878	-0.09511	-0.075774	-0.015762	-0.04609	0.014699	0.094684	0.2309	0.032616	-0.116298	2.05315
chr3L_19071513_19072669	chr3L_19071513_19072669	1	-0.131504	-0.248983	0.331246	0.14096	0.189193	0.215151	0.292722	0.544811	0.442327	0.26125	0.091154	0.077131	0.116162	0.027909	0.24012	0.187187	0.291415	0.315487	0.339331	0.291544	0.26896	0.221054	0.187918	0.40003	0.154137	0.268723	0.18411	0.089917	0.088145	0.037277	0.062849	-0.035333	-0.013822	0.055194	-0.04439	-0.060103	0.031658	-0.02808	0.003195	0.075283	0.003364	-0.023789	0.018876	0.08355	0.035562	-0.004649	0.141449
chr3L_19072918_19073201	chr3L_19072918_19073201	1	-0.359619	-0.287453	0.302006	0.112606	0.344481	0.285044	0.374589	0.711828	0.469755	0.335251	0.027435	0.023315	0.037633	0.019369	0.125935	0.190623	0.290266	0.315223	0.193662	0.382535	0.232806	0.095522	0.092404	0.517686	0.158206	0.25941	0.18463	0.093225	0.131798	0.075636	-0.008264	-0.180072	-0.102537	0.249061	-0.220226	-0.04879	0.035538	0.035304	0.017221	0.025003	-0.007095	-0.045965	-0.063248	0.04739	0.308481	0.10783	0.150147
chr3L_19079330_19079941	chr3L_19079330_19079941	1	-0.334775	-0.138065	0.247116	0.32867	0.240177	0.364976	0.371152	0.238634	0.000738	0.042421	0.036059	0.00525	0.115533	-0.022486	0.066411	0.271563	0.270033	0.124814	0.196066	0.161908	0.200779	0.147329	0.2122	0.27288	0.212929	0.193333	0.068324	0.062695	0.067684	-0.007613	0.011914	0.062425	-0.109337	-0.142217	-0.140619	-0.066983	-0.001055	-0.064886	-0.030739	0.018868	0.012383	-0.011136	-0.019092	0.031882	-0.081932	-0.2625	1.37228
chr3L_19287893_19288185	chr3L_19287893_19288185	1	-0.274209	-0.102476	-0.11584	0.025221	-0.006885	0.233601	0.339013	0.201826	0.137618	-0.000292	0.495659	0.6628	0.644116	0.613198	0.139553	0.044611	0.168801	0.335084	0.207292	0.348092	0.126947	0.229544	0.028203	-0.046529	0.206253	0.207544	0.171306	0.115914	0.211383	0.015759	0.071539	0.191782	-0.061013	-0.037546	-0.254791	0.136925	0.002407	-0.053941	0.100608	0.011826	0.001933	0.045623	0.074504	0.033435	0.227252	0.01663	1.05978
chr3L_19889456_19889871	chr3L_19889456_19889871	1	-0.34736	-0.309028	0.015658	0.026407	0.252095	0.021646	0.148689	0.154559	0.004451	0.01308	0.104052	0.345379	0.102256	0.073392	0.00544	0.18721	0.336374	0.09798	0.122164	0.08219	0.063778	0.217257	-0.102541	0.121089	0.061485	0.145733	0.126052	0.008061	0.001216	-0.042185	0.019881	-0.079341	-0.108787	-0.175388	-0.176856	-0.164846	-0.004284	-0.117127	-0.00712	-0.008817	-0.011156	-0.010649	0.01429	0.024979	0.042876	-0.143964	0.765973
chr3L_19890570_19890783	chr3L_19890570_19890783	1	-0.742874	-0.244243	0.118527	0.004393	0.331139	0.063499	-0.005246	0.14929	-0.046484	-0.026975	0.268559	0.469131	0.193933	0.113819	-0.028336	0.202348	0.282063	0.114557	0.077743	0.156003	0.054662	0.150629	0.021637	0.231659	0.097163	0.156023	0.044213	-0.015987	0.030778	0.056511	0.081197	-0.13225	-0.070966	-0.23711	-0.25505	-0.187055	-0.004598	-0.144003	-0.024783	0.017522	-0.033936	-0.030711	0.005125	-0.028362	0.130793	-0.147428	0.186224
chr3L_19896537_19896744	chr3L_19896537_19896744	1	-0.568256	-0.373797	0.067227	0.075051	0.181364	0.205606	0.106706	0.254355	0.125604	0.125475	0.10789	0.170309	0.073901	0.00604	0.248671	0.264033	0.169092	0.181939	0.179875	0.204719	0.22106	0.198066	0.122497	0.269166	0.131457	0.174381	0.138326	0.02594	0.016708	-0.02165	0.009016	-0.217454	-0.087517	-0.052987	-0.156246	-0.117468	-0.013729	-0.092685	-0.037837	0.026212	-0.060115	-0.025089	-0.007556	-0.078922	0.058266	-0.483438	0.057198
chr3L_20778263_20778698	chr3L_20778263_20778698	1	-0.51671	-0.111425	-0.092052	-0.03192	0.130138	0.358304	0.547043	0.222053	0.243262	0.065292	0.351271	0.436025	0.212535	0.057327	0.219781	0.138135	0.266801	0.132441	0.163184	0.077005	0.089593	0.041795	0.061865	0.158956	0.129613	0.229111	0.212732	0.082671	0.016038	0.027391	0.042361	0.284064	0.014327	-0.197747	-0.131579	-0.164938	0.013893	-0.055661	-0.042749	0.109789	0.084257	0.005106	0.211594	0.05941	-0.032346	-0.119727	1.67094
chr3L_21873374_21873894	chr3L_21873374_21873894	1	-0.189907	-0.255897	0.038479	0.066983	0.130994	0.301571	0.281539	0.172475	0.130454	-0.008804	0.118123	0.250348	0.082495	0.082864	0.439957	0.097578	0.136376	0.243999	0.192116	0.323351	0.307812	0.175094	0.11902	0.045898	0.218552	0.269509	0.28746	0.050685	0.042082	0.030412	0.039591	0.059538	-0.116745	-0.052666	-0.039831	0.164058	0.007375	0.000342	0.113421	0.262405	0.005361	-0.001536	0.013779	0.019382	0.108876	-0.032022	0.47699
chr3L_22902276_22902987	chr3L_22902276_22902987	1	-0.104945	-0.108441	-0.018053	0.043544	0.047552	0.089115	0.231948	0.298207	0.306144	0.134944	0.142253	0.189613	0.137636	0.075187	0.244131	0.134093	0.184887	0.284459	0.195217	0.124845	0.212936	0.159107	0.140269	0.110805	0.175995	0.376842	0.295558	0.071626	0.128941	0.038276	0.031194	0.015149	0.007152	0.023994	-0.107667	0.07452	-0.001802	-0.015071	0.081735	0.136099	0.026277	0.024643	0.134229	0.113723	0.213809	0.140483	0.426975
chr3L_22941017_22942068	chr3L_22941017_22942068	1	-0.29086	-0.12365	-0.066505	0.003276	-0.067347	0.271986	0.424025	0.378926	0.335202	0.189531	0.096144	0.080884	0.13009	0.039468	0.121004	0.108942	0.36998	0.407737	0.218561	0.265015	0.365974	0.224399	0.171037	0.191152	0.221792	0.391823	0.413856	0.055228	0.133566	0.021326	0.0373	-0.033595	-0.045273	0.091499	-0.107033	0.15737	0.01697	-0.005079	0.041822	0.165334	0.015983	0.009978	0.170969	0.207713	0.168673	-0.006543	0.168414
chr3L_2585887_2586104	chr3L_2585887_2586104	1	-0.646192	-0.53177	0.277265	0.556499	0.369088	0.335453	0.419486	0.264624	0.088383	0.110671	0.120551	0.277002	0.241837	0.02113	0.132911	0.340304	0.357251	0.133383	0.102357	0.24148	0.356566	0.297291	0.180148	-0.080369	0.092034	0.374911	0.271836	0.015198	0.045379	-0.02257	-0.037793	0.021368	-0.094539	-0.034339	-0.152265	-0.162089	-0.040729	-0.03817	-0.013232	0.095014	0.007168	-0.027394	-0.010005	0.037413	0.173487	-0.163884	1.87702
chr3L_2817994_2818298	chr3L_2817994_2818298	1	-0.423006	-0.333766	0.287403	0.343286	0.172221	0.264846	0.243112	0.302409	0.22459	0.182803	0.134053	0.149539	0.043757	-0.052809	0.183164	0.18064	0.321246	0.250329	0.295125	0.238439	0.169709	0.173722	0.265369	0.192654	0.214857	0.484625	0.365333	0.042804	0.12264	0.015499	0.019237	-0.177984	-0.087631	-0.148402	-0.215117	-0.202139	-0.003548	-0.085168	-0.087332	0.098121	-0.016158	0.020292	-0.02978	0.040241	-0.013711	-0.264036	-0.106767
chr3L_3225969_3226579	chr3L_3225969_3226579	1	-0.389754	-0.206831	-0.100946	0.404919	0.334645	0.440343	0.399258	0.28761	0.456395	0.091401	0.454147	0.497685	0.281999	0.182503	0.090974	0.070545	0.472004	0.268935	0.210664	0.269748	0.207354	0.039088	0.082442	0.023911	0.262042	0.143704	0.131573	0.165502	0.209731	-0.045466	0.121219	0.285755	0.318603	-0.177043	-0.093262	-0.166653	0.000413	-0.039478	-0.040593	-0.012021	-0.025159	0.034432	0.36885	0.567955	0.282812	-0.16746	1.64444
chr3L_3420344_3420562	chr3L_3420344_3420562	1	-0.430299	-0.33715	0.142422	0.065213	0.080521	0.053947	0.145234	0.233237	0.02954	0.088793	0.318881	0.066345	0.075296	0.001351	-0.065004	0.218007	0.317578	0.170608	0.149522	0.237654	0.061339	0.172957	0.158591	0.128154	0.06704	0.219454	0.0836	0.02946	0.005951	0.004043	-0.03869	-0.110426	-0.230107	-0.108144	-0.214297	-0.265843	-0.008598	-0.124159	-0.089657	0.008683	-0.021604	-0.037717	-0.094204	-0.011253	-0.170513	-0.167555	0.049041
chr3L_3432971_3433464	chr3L_3432971_3433464	1	-0.292975	-0.226091	0.071564	0.075498	0.028238	0.232738	0.282022	0.347839	0.392345	0.24883	0.089189	0.039964	0.080521	0.022478	0.015133	0.185386	0.229134	0.194561	0.177413	0.42944	0.102297	0.252027	0.121733	0.22575	0.254008	0.327208	0.243646	0.118543	0.17051	0.054691	0.094737	-0.23586	-4.6e-05	0.078921	-0.202293	0.038426	0.008927	-0.011231	0.03568	0.024451	0.050762	0.018867	-0.02308	0.057463	0.086696	-0.027126	-0.047511
chr3L_542857_543778	chr3L_542857_543778	1	-0.262046	-0.270061	0.209712	0.371532	0.416745	0.183571	0.262995	0.242284	0.120132	0.062675	0.259895	0.709853	0.465695	0.449502	0.180902	0.18713	0.203678	0.167326	0.166486	0.325621	0.08828	0.090512	0.150385	0.041327	0.12468	0.185715	0.232233	0.044355	0.070682	-0.007038	-0.01205	0.257434	0.19175	-0.110272	-0.145932	-0.087523	0.001463	-0.046578	0.027611	0.112328	0.043974	-0.017388	0.067483	0.031573	0.093467	-0.141879	1.9226
chr3L_548434_549346	chr3L_548434_549346	1	-0.431869	-0.317789	0.165282	0.209729	0.241428	0.452567	0.331183	0.450174	0.369637	0.236533	0.214912	0.158589	0.296821	0.071935	0.123112	0.23087	0.344726	0.299389	0.353877	0.519145	0.312662	0.212119	0.275155	0.358934	0.349638	0.363505	0.273422	0.109466	0.239389	0.04479	0.105362	-0.167285	-0.162184	0.014655	-0.219011	-0.130084	0.003041	-0.05492	-0.093176	0.168418	-0.032241	0.008371	0.005089	0.113619	0.223826	-0.037501	0.527646
chr3L_6209538_6209896	chr3L_6209538_6209896	1	-0.48642	-0.248669	-0.180112	0.138061	0.150683	0.21055	0.176228	0.230834	0.024263	0.089285	0.055646	-0.041738	0.096648	-0.048449	0.118158	0.04446	0.087588	0.13398	0.243324	0.186103	0.150824	0.068957	0.207648	0.130227	0.146595	0.19458	0.183651	0.006045	0.051345	0.020174	-0.061157	-0.15698	0.004678	-0.164528	-0.115945	-0.11839	0.02232	-0.084414	-0.080227	0.048974	-0.045598	-0.052464	0.030251	-0.030179	0.085511	-0.263604	0.455854
chr3L_627814_629315	chr3L_627814_629315	1	-0.036053	0.333115	0.068052	0.123004	0.211813	0.307697	0.406607	0.425438	0.257747	0.127608	0.124924	0.24708	0.162412	0.067074	0.50016	0.188183	0.288195	0.318731	0.313738	0.310639	0.275975	0.133175	0.240007	0.37974	0.682266	0.78049	0.732653	0.318452	0.471542	0.528631	0.542473	0.018491	-0.132708	-0.076489	-0.027536	-0.017438	0.020611	-0.049554	0.215249	0.008542	0.028958	0.039696	-0.055181	0.177306	0.257831	0.349447	1.5601
chr3L_640380_640789	chr3L_640380_640789	1	-0.607136	-0.472936	-0.082497	0.244501	0.277386	0.31456	0.444494	0.406191	0.256543	0.142917	0.442185	0.263428	0.208138	0.047789	0.417122	0.219982	0.381264	0.359025	0.193275	0.311118	0.175565	0.15281	0.015818	0.052472	0.294662	0.463467	0.315876	0.125404	0.052763	0.141675	0.182752	-0.105486	-0.092093	-0.120026	-0.240815	-0.234457	-0.015974	-0.101617	-0.0457	0.06818	-0.008174	-0.033389	0.051837	0.135237	0.140159	-0.109561	1.19604
chr3L_647227_647508	chr3L_647227_647508	1	-0.255354	-0.468786	0.217903	-0.142026	0.050809	0.038949	0.258159	0.46921	0.313125	0.223697	0.105357	0.178365	0.231224	0.219028	0.049557	0.167818	0.202198	0.120751	0.147051	0.251387	0.15677	0.094515	-0.02404	0.383738	0.172767	0.411336	0.190408	0.082263	-0.063268	0.164997	0.211061	-0.010843	-0.307744	0.09689	-0.03212	-0.334267	0.015153	-0.020089	-0.065581	-0.005624	-0.061444	-0.071723	-0.095467	0.060178	-0.033002	-0.196469	0.653509
chr3L_648562_648968	chr3L_648562_648968	1	-0.338626	-0.263884	-0.173012	0.152283	0.491344	0.137005	0.464985	0.300416	0.191283	0.098408	0.491471	0.58061	0.66194	0.711409	0.032155	0.028312	0.341438	0.354691	0.101067	0.319417	0.150147	0.13847	0.015482	0.044548	0.130326	0.235855	0.260067	0.036284	0.017113	-0.023949	-0.002171	0.271745	-0.024836	0.06858	-0.211687	-0.0963	-0.008612	0.01892	0.029309	-0.026899	0.013412	-0.040659	0.06424	0.065396	0.145194	0.057564	1.18595
chr3L_685023_685815	chr3L_685023_685815	1	-0.098597	-0.051285	-0.019065	0.28586	0.365526	0.282814	0.416237	0.284167	0.34772	0.079146	0.144663	0.359601	0.197628	0.183614	0.204127	0.103164	0.298257	0.120492	0.090875	0.205532	0.092047	0.193001	0.158581	0.05385	0.136816	0.296665	0.180673	0.092295	0.078445	0.018546	0.057328	0.283972	0.190611	0.008928	-0.073228	-0.021969	0.005399	0.078075	0.061585	0.093944	0.021178	-0.001256	0.20691	0.084483	0.238177	0.15172	1.09511
chr3L_6956328_6956645	chr3L_6956328_6956645	1	-0.623372	-0.356178	0.029276	0.062979	0.316061	0.274107	0.361788	0.42013	0.239349	0.203581	0.072751	0.17931	0.144238	-0.007962	0.048907	0.044321	0.219393	0.161478	0.282738	0.251796	0.180169	0.048531	0.042853	0.261199	0.183518	0.273493	0.214788	0.058315	0.094095	0.01876	0.066206	-0.153263	-0.21634	0.010821	-0.223067	-0.201086	-0.023567	-0.070946	-0.065145	-0.009029	0.007832	-0.065035	0.050526	0.037939	0.218146	-0.170879	1.09914
chr3L_749082_749656	chr3L_749082_749656	1	-0.293687	-0.248216	0.142359	0.575188	0.377577	0.264063	0.271886	0.204532	0.005202	-0.014162	0.106493	0.115506	0.092079	0.085697	0.094806	0.355743	0.356454	0.793154	0.198777	0.229772	0.497587	0.22668	0.312232	0.205038	0.344999	0.166988	0.064834	0.087227	0.148843	0.06232	0.249114	-0.113724	-0.166866	-0.012071	-0.152957	-0.023448	-0.004029	-0.073817	-0.065867	0.04419	0.007988	-0.026061	0.029469	0.052424	0.208669	-0.164089	1.51473
chr3L_774247_775040	chr3L_774247_775040	1	-0.302567	-0.206974	0.153687	0.049576	0.091472	0.354169	0.172791	0.409269	0.271106	0.202026	0.16448	0.155571	0.187147	0.282417	0.190722	0.356361	0.39559	0.348455	0.228518	0.517856	0.31096	0.285903	0.224357	0.294881	0.244706	0.262211	0.192588	0.091448	0.205379	0.045002	0.033619	-0.066446	-0.052242	-0.025241	-0.079714	0.04282	-0.003775	-0.00694	0.020475	0.053576	0.012595	0.084428	0.030535	0.103263	0.112792	-0.157938	-0.088006
chr3L_7860146_7860853	chr3L_7860146_7860853	1	-0.219203	-0.072352	0.08351	-0.037518	0.067794	0.221181	0.231244	0.345731	0.176433	0.17541	0.435592	0.160199	0.092065	0.114744	0.071474	0.142343	0.099267	0.094777	0.11334	0.285531	0.115819	0.228331	0.133785	0.343741	0.112013	0.228193	0.14331	0.077814	0.085993	0.060468	-0.033782	0.030307	0.104198	-0.036478	-0.044416	0.103167	0.005201	0.001028	-0.009206	0.043049	0.028188	0.122365	0.028413	0.036251	0.02077	-0.057527	-0.084202
chr3L_8684756_8685159	chr3L_8684756_8685159	1	-0.580722	-0.243652	-0.010512	-0.219226	0.084596	0.230067	0.213785	0.443649	0.350216	0.235562	0.221852	0.016961	0.070302	0.011683	0.154918	0.080759	0.231263	0.301331	0.236071	0.446575	0.182927	0.139461	-0.001777	0.257465	0.262553	0.225161	0.229543	0.022348	0.216784	-0.001367	0.019072	-0.280899	-0.22142	-0.071547	-0.25577	-0.100273	-0.005212	-0.090617	-0.038913	-0.029515	0.029561	-0.015429	-0.03962	0.068547	0.053444	-0.069046	-0.061904
chr3L_8685464_8686060	chr3L_8685464_8686060	1	-0.40698	-0.070245	0.291554	-0.155332	0.132506	0.078231	0.155507	0.472562	0.182389	0.258653	0.123413	-0.019914	0.081393	0.053212	0.390982	0.126627	0.161852	0.423575	0.285372	0.351408	0.162213	0.146303	-0.019563	0.368325	0.197889	0.210519	0.297304	0.065135	0.122013	0.055298	0.008002	-0.113151	-0.061245	0.023678	-0.160883	0.199112	0.029334	0.005137	0.054679	0.011213	-0.013203	0.03858	0.037041	0.090743	0.191176	0.148291	-0.151959
chr3L_9394172_9394450	chr3L_9394172_9394450	1	-0.397027	-0.26834	-0.12644	0.153058	0.381629	0.391895	0.49747	0.481318	0.44023	0.158797	0.143416	0.178731	0.184909	-0.00224	-0.047748	0.024716	0.398669	0.170642	0.201605	0.178323	0.135252	0.129541	-0.039914	0.074671	0.190775	0.207798	0.199925	-0.012542	0.148185	-0.002327	0.164312	0.09553	0.18592	-0.068138	-0.334625	-0.226041	0.002527	-0.069093	-0.122179	0.057584	-0.02205	-0.074394	0.165095	0.060019	0.046839	-0.028506	1.58035
chr3L_9847047_9847303	chr3L_9847047_9847303	1	-0.393448	-0.192526	0.041192	0.336288	0.107866	0.156152	0.246038	0.105906	0.045299	0.015425	0.218221	0.348938	0.233022	0.190746	0.134003	0.231173	0.257088	0.184967	0.133041	0.170218	0.148301	0.072346	0.000385	-0.035407	0.22819	0.398003	0.387196	0.091329	0.21314	-0.007931	0.023154	-0.063997	-0.076621	-0.127588	-0.049498	-0.027539	-0.018903	-0.079757	-0.017636	0.017437	-0.006115	0.051769	-0.008963	0.118232	0.177383	-0.09712	1.84786
chr3R_10111973_10112774	chr3R_10111973_10112774	1	-0.391476	-0.110625	0.35258	0.336445	0.346896	0.212952	0.281113	0.236822	0.071478	0.026374	0.392623	0.702075	0.761226	0.755638	0.122671	0.015244	0.148666	0.225389	0.16096	0.308551	0.57744	0.087917	-0.03186	0.190524	0.228379	0.178307	0.127274	0.078049	0.103352	0.076836	0.088183	0.039351	-0.099651	-0.150984	-0.103391	-0.047754	-0.002096	-0.068061	0.014623	0.109497	-0.002623	0.03345	0.319983	0.038821	0.127173	-0.093841	1.3944
chr3R_10549424_10550086	chr3R_10549424_10550086	1	-0.300912	-0.197286	0.092656	0.269244	0.141707	0.239961	0.279752	0.13518	0.027648	0.032558	0.802728	0.70369	0.466308	0.316387	0.063454	0.178785	0.231559	0.22379	0.198222	0.204124	0.112079	0.394939	0.127668	-0.010343	0.250286	0.150963	0.152583	0.066628	0.176919	0.016845	0.013522	0.077002	-0.033614	0.038547	-0.142446	-0.015062	0.005392	-0.004823	0.003808	0.089614	-0.014699	-0.000714	0.101821	0.101178	0.328689	0.0132	1.37311
chr3R_10564348_10565442	chr3R_10564348_10565442	1	-0.0908	-0.091459	0.206636	0.187624	0.352207	0.579337	0.652068	0.553917	0.514862	0.169145	0.238476	0.406601	0.273518	0.11272	0.23567	0.276978	0.348659	0.510843	0.271957	0.321395	0.195401	0.110788	0.156415	0.134276	0.324544	0.435588	0.378684	0.053452	0.211136	0.04063	0.117742	0.029568	-0.004966	0.008923	-0.112354	0.082908	0.021067	-0.011196	0.068313	0.047925	0.052913	0.033198	0.037287	0.03923	0.1755	-0.047185	1.86176
chr3R_11117196_11117655	chr3R_11117196_11117655	1	-0.277775	-0.045378	0.073638	0.367381	0.309587	0.341124	0.498636	0.330257	0.299103	0.167837	0.106742	0.127058	0.117307	0.086276	0.03911	0.158628	0.264992	0.152415	0.122375	0.293581	0.173092	0.191177	0.145878	0.106445	0.108169	0.271536	0.171319	0.026087	0.052051	0.014569	0.052752	0.145923	0.009234	-0.10086	-0.05537	0.018612	0.003567	-0.032642	0.040145	0.043467	0.009328	0.01003	0.104361	0.102815	0.015857	-0.057342	1.73562
chr3R_11476548_11477140	chr3R_11476548_11477140	1	-0.028499	-0.014672	0.110646	-0.015604	0.132604	0.126593	0.096827	0.31955	0.182895	0.136943	0.070267	0.101773	0.057189	0.008495	0.225542	0.119979	0.034753	0.213209	0.268317	0.209754	0.177983	0.222384	0.0205	0.347541	0.227624	0.249145	0.21517	0.099499	0.214678	0.102199	0.128082	0.005632	0.015893	-0.019087	0.052534	0.054033	0.034967	-0.014675	-0.010162	-0.012452	0.005325	0.057801	0.020611	0.007487	0.276191	-0.012804	-0.065988
chr3R_11799409_11799800	chr3R_11799409_11799800	1	-0.224551	-0.281439	0.03558	0.324401	0.391443	0.195607	0.326744	0.313302	0.184493	0.113027	0.256162	0.37146	0.259524	0.266207	0.122017	0.258971	0.340875	0.14344	0.086824	0.24632	0.235421	0.060042	0.316429	0.055323	0.095616	0.374719	0.178434	0.091662	0.020054	0.004811	-0.035673	0.016026	-0.003916	-0.067085	-0.092341	-0.081426	0.000903	-0.059493	-0.021668	0.023871	0.041935	0.047811	0.043017	0.032445	0.155097	-0.109386	1.45485
chr3R_11809797_11811023	chr3R_11809797_11811023	1	-0.076578	0.086008	0.105806	-0.013593	0.022634	0.201949	0.190723	0.528061	0.271104	0.296757	0.14599	0.023391	0.156959	0.167096	0.262337	0.394446	0.288881	0.226518	0.23728	0.221677	0.157473	0.180649	0.051601	0.515616	0.244893	0.327163	0.269554	0.115029	0.151141	0.100601	0.064683	-0.066053	-0.105903	0.122806	-0.011308	0.0878	0.022069	0.005051	0.020623	0.006965	0.113368	0.16872	0.053057	0.106696	0.127948	-0.010253	-0.028233
chr3R_11830599_11831206	chr3R_11830599_11831206	1	-0.345444	-0.080286	0.418233	0.083604	0.054712	0.142234	0.301629	0.415692	0.225049	0.263753	0.08092	0.099894	0.279206	0.307093	0.082965	0.60339	0.355624	0.129956	0.159854	0.160755	0.09305	0.105366	0.137338	0.392036	0.226555	0.34026	0.219905	0.073325	0.092656	0.071145	0.077579	-0.093498	-0.017698	0.174313	0.014617	0.181858	0.023702	-0.016586	0.029565	0.029868	0.077621	0.129896	-0.007827	0.048231	0.124238	0.042853	0.042647
chr3R_11851484_11851996	chr3R_11851484_11851996	1	-0.475165	-0.152997	0.133846	0.293238	0.095509	0.087138	0.244793	0.243215	-0.040817	0.071729	0.165322	0.045641	0.109685	0.060505	0.072235	0.687346	0.680326	0.184004	0.161846	0.181703	0.045677	0.007969	0.017128	-0.032097	0.352048	0.660556	0.441448	0.115799	0.097092	0.261226	0.31669	-0.18865	-0.184185	-0.100623	-0.198504	-0.070522	-0.017464	-0.048581	0.055966	-0.087822	0.05381	0.020257	-0.041305	0.083863	0.083755	0.057575	1.61567
chr3R_12060773_12061711	chr3R_12060773_12061711	1	0.113414	-0.040425	0.065073	0.016707	0.054588	0.031611	0.032076	0.2953	0.058108	0.090497	0.174006	0.17286	0.127627	0.068424	0.59619	0.296008	0.154535	0.299804	0.227683	0.15681	0.096661	0.096746	0.038447	0.353092	0.242405	0.224533	0.267989	0.088461	0.09794	0.062165	0.044739	0.023122	0.050294	0.032008	0.013621	0.155182	0.011392	0.0088	0.008879	-0.030775	0.002542	0.058221	0.153294	0.098175	0.15898	0.146446	-0.269108
chr3R_12066220_12067447	chr3R_12066220_12067447	1	-0.362859	-0.163291	0.503021	-0.173497	0.091669	0.182025	0.286657	0.409799	0.201258	0.233627	0.190403	0.458466	0.256619	0.232799	0.087364	0.166219	0.165842	0.161144	0.189363	0.203992	0.081731	0.364911	0.116512	0.500417	0.229377	0.341599	0.22098	0.070263	0.132785	0.045363	0.040839	0.020346	-0.092049	0.234759	0.011515	-0.002421	0.040752	-0.039627	0.020424	0.009541	0.02057	0.019147	0.009851	0.08616	0.183098	0.243607	0.117026
chr3R_12068037_12068701	chr3R_12068037_12068701	1	-0.36397	-0.07417	0.201899	-0.02887	0.258733	-0.009529	0.104411	0.135364	0.015299	0.017798	0.288093	0.479258	0.322102	0.29847	0.314968	0.169165	0.220459	0.341747	0.247319	0.32538	0.187999	0.172208	0.068501	0.208787	0.238319	0.396221	0.225853	0.13514	0.192159	0.075983	0.067924	0.017715	-0.178541	0.093461	-0.117192	0.072987	0.001732	0.012138	0.036714	0.018171	0.074975	0.044547	0.072767	0.124778	0.206455	0.123595	0.968396
chr3R_12075236_12076663	chr3R_12075236_12076663	1	-0.208114	-0.090023	0.204696	0.11196	0.210895	0.104529	0.184831	0.200313	0.122449	0.093181	0.529016	0.387392	0.236012	0.26378	0.24713	0.184447	0.12828	0.264768	0.765662	0.257872	0.342707	0.136894	0.148563	0.266872	0.15062	0.389347	0.283772	0.089612	0.088733	0.074308	0.057056	0.058271	0.070661	0.017718	-0.035245	0.026584	0.011173	-0.022643	0.067659	0.028619	0.077519	0.07653	0.056764	0.076629	0.165533	0.020245	0.11981
chr3R_12278746_12278947	chr3R_12278746_12278947	1	-0.347134	-0.22487	-0.096158	0.444416	0.330708	0.288653	0.51348	0.297343	0.180222	0.04732	0.201544	0.24561	0.170838	0.024328	0.06467	-0.002507	0.310683	0.087955	0.091361	0.220129	0.153818	-0.019208	-0.065165	-0.075338	0.163531	0.15278	0.052443	0.018673	0.204545	-0.006749	0.06396	0.014146	0.096149	0.000138	-0.253389	-0.070823	-0.003926	-0.017418	0.021428	0.066951	-0.007481	-0.051209	0.04548	0.024146	0.064769	-0.230992	1.85163
chr3R_13525763_13527684	chr3R_13525763_13527684	1	-0.113216	-0.09405	-0.024497	0.000697	0.28418	0.381619	0.654508	0.621213	0.633279	0.33783	0.131063	0.134303	0.147208	0.071659	0.272092	0.136749	0.397211	0.406123	0.297943	0.40543	0.238916	0.218712	0.112721	0.29261	0.378617	0.358581	0.366093	0.107834	0.246693	0.020885	0.069475	-0.129395	0.009994	0.13527	-0.027839	-0.019146	-0.002705	-0.021113	0.025131	0.01181	0.030013	0.061226	0.127772	0.10866	0.336704	0.01048	0.996197
chr3R_13542810_13543186	chr3R_13542810_13543186	1	-0.260093	-0.164362	-0.041235	0.264532	0.220818	0.270175	0.375957	0.270784	0.295841	0.106105	0.354518	0.346152	0.247884	0.084896	0.093759	0.117034	0.309081	0.1874	0.126635	0.191204	0.186923	0.161373	0.124698	-0.033419	0.157663	0.249622	0.180918	0.078309	0.147699	0.020274	0.061529	0.056966	-0.108613	0.051568	-0.064648	0.228536	0.016055	0.015355	0.07293	0.033667	0.034723	0.026849	0.162425	0.109528	0.129388	-0.094449	1.34211
chr3R_14069987_14070850	chr3R_14069987_14070850	1	-0.179977	-0.118882	-0.00117	-0.003335	0.070568	0.209615	0.47511	0.460025	0.312596	0.15891	0.165903	0.295999	0.126021	0.088854	0.129365	0.17551	0.367812	0.356305	0.149328	0.268794	0.143333	0.098422	0.214996	0.056729	0.249639	0.400744	0.315719	0.094066	0.255941	0.061326	0.144474	-0.06393	0.055058	0.063163	-0.029837	0.004465	0.012245	0.00404	0.071538	0.019477	0.002051	0.040142	0.151243	0.166393	0.154571	0.186468	0.872762
chr3R_14274467_14274902	chr3R_14274467_14274902	1	-0.306145	-0.280727	-0.025581	-0.093828	-0.037938	0.111949	0.163668	0.310256	0.12406	0.087088	0.122131	-0.003641	0.081813	-0.005499	0.014204	0.14667	0.13922	0.243631	0.211102	0.182657	0.040665	0.106292	0.028826	0.21517	0.468612	0.303668	0.224062	0.122332	0.112227	0.032835	0.06756	-0.226196	-0.13403	-0.116694	-0.205144	-0.108775	0.000577	-0.084771	-0.046038	0.002086	-0.058603	0.050525	0.01672	0.05628	0.158299	-0.058205	-0.0482
chr3R_14742524_14743061	chr3R_14742524_14743061	1	-0.223034	-0.126868	0.004597	0.000612	0.285272	0.526735	0.474266	0.444491	0.304839	0.135079	0.140221	0.055001	0.142782	0.162301	0.105395	0.230242	0.101687	0.071502	0.105884	0.138266	0.203553	0.191304	0.081268	0.152329	0.205984	0.255002	0.229534	0.060785	0.119807	0.03205	0.063902	-0.098952	-0.076498	-0.040784	-0.082464	0.12131	-0.002573	-0.05464	0.023598	0.087629	0.049892	-0.021211	0.03651	0.033645	-0.045646	-0.268682	0.164301
chr3R_14749528_14749693	chr3R_14749528_14749693	1	-0.364558	-0.19611	-0.001313	0.079524	0.14025	0.19195	0.292515	0.167107	0.125794	0.02204	0.073938	0.128045	0.204784	0.092633	0.073839	0.239833	0.187666	0.164662	0.130664	0.187898	0.070643	0.093482	0.210284	0.108118	0.167629	0.272062	0.189987	0.027064	0.175078	0.023763	0.202682	-0.176524	-0.005718	-0.130672	-0.214751	-0.066534	-0.016181	-0.069343	-0.096649	0.09225	0.006309	-0.005946	0.079325	0.029068	-0.041953	-0.339049	0.513732
chr3R_15289736_15290095	chr3R_15289736_15290095	1	-0.490323	-0.363139	0.095246	0.267127	0.190138	0.223666	0.354213	0.312861	0.171681	0.02869	0.071229	0.135076	0.089538	0.049139	0.061032	0.022482	0.15704	0.10668	0.236673	0.28063	0.117435	0.090332	0.170394	0.094264	0.207052	0.300402	0.226112	0.077375	0.194788	0.087184	0.110714	0.017741	-0.130524	-0.223347	-0.087763	-0.231038	-0.011982	-0.093852	-0.101666	0.061447	0.0596	0.033159	-0.013344	-0.039723	-0.17506	-0.373257	0.854755
chr3R_16079485_16079926	chr3R_16079485_16079926	1	-0.323476	-0.18791	0.111079	0.351911	0.131385	0.214896	0.362393	0.203603	0.044866	0.039504	0.03949	0.214288	0.185776	0.077816	0.149225	0.194251	0.157558	0.133434	0.089782	0.255192	0.14481	0.094611	0.117358	-0.002864	0.141351	0.264333	0.219879	-0.001803	0.036816	0.019429	-0.043352	0.024002	-0.045801	-0.17234	-0.064786	-0.028213	-0.002698	-0.083605	-0.038933	0.046128	0.046606	0.041989	0.050603	0.026085	0.076835	-0.209042	1.61757
chr3R_16135096_16135331	chr3R_16135096_16135331	1	-0.446434	-0.324487	-0.136555	0.196188	-0.041516	0.140195	0.382224	0.197644	0.105542	0.0614	0.420558	0.456298	0.367939	0.220405	0.070888	0.248299	0.15118	0.145337	0.196973	0.168334	-0.009905	0.045195	0.031574	-0.045601	0.083924	0.226899	0.144916	0.067792	0.039104	-0.01739	-0.020782	0.125663	-0.079312	-0.240241	-0.124434	-0.118478	-0.003475	-0.082073	-0.005755	-0.031538	0.034222	0.019611	0.087625	0.119813	0.040648	-0.130867	1.53852
chr3R_16136877_16137398	chr3R_16136877_16137398	1	-0.398409	-0.252041	-0.091023	0.179313	0.321207	0.142125	0.195548	0.552868	0.222858	0.182549	0.120349	0.08648	0.149744	-0.015415	0.058621	0.233315	0.200085	0.284453	0.322336	0.228732	0.158192	0.219235	0.045024	0.411916	0.215362	0.230574	0.228417	0.081618	0.078668	0.023035	0.010375	-0.337156	-0.071352	-0.036766	-0.243068	-0.153643	-0.000704	-0.071614	-0.075845	0.036874	0.028697	-0.000159	-0.002735	0.058526	0.244822	0.001906	1.30903
chr3R_16782587_16782953	chr3R_16782587_16782953	1	-0.197111	-0.073997	0.131076	-0.025537	0.001923	0.15463	0.089916	0.15322	0.074068	0.07767	0.070295	0.063524	0.120589	0.133185	0.177666	0.107313	0.266662	0.205401	0.119551	0.371539	0.162896	0.123452	0.25731	0.301649	0.329681	0.220867	0.13417	0.110358	0.32439	0.033979	0.071215	-0.143278	-0.001893	-0.037018	-0.055168	-0.006052	0.001451	0.019371	-0.005092	0.092536	0.044795	0.079066	0.118947	0.104767	0.12955	0.142505	0.24357
chr3R_16885567_16886799	chr3R_16885567_16886799	1	-0.155867	-0.111735	0.095588	0.306826	0.52514	0.425144	0.551839	0.495815	0.456604	0.19582	0.26493	0.485113	0.294938	0.304947	0.127023	0.140625	0.294503	0.254481	0.19292	0.264424	0.194545	0.097644	0.12482	0.238091	0.136914	0.295648	0.200476	0.018553	0.022717	0.039141	-0.013056	0.452154	-0.063698	0.042936	-0.006919	0.005958	0.007386	-0.00247	0.034584	0.137528	0.031064	-0.007692	0.132808	0.048103	0.064899	-0.015048	2.26696
chr3R_17477111_17477860	chr3R_17477111_17477860	1	-0.140986	-0.173259	0.141415	0.022541	0.087346	0.190356	0.152694	0.397736	0.38647	0.207454	0.096355	0.070299	0.066694	0.072426	0.232207	0.228577	0.212085	0.202497	0.144762	0.226384	0.153587	0.197802	0.249166	0.283491	0.272205	0.298343	0.253896	0.138569	0.147965	0.055377	0.035026	0.009544	0.016068	-0.026714	-0.00904	0.033441	0.018737	-0.045718	0.030175	0.048969	0.02385	0.221195	0.060234	0.07069	0.081309	-0.207095	-0.172607
chr3R_17478495_17478858	chr3R_17478495_17478858	1	-0.477302	-0.30209	0.249122	-0.168366	-0.059271	0.267485	0.1066	0.207606	0.291841	0.135947	0.068349	0.00972	0.030979	0.031749	0.550446	0.205395	0.224813	0.187109	0.172058	0.266745	0.192854	0.240778	0.207384	0.296606	0.168729	0.16375	0.119356	0.01974	0.068937	-0.015628	-0.028697	-0.124367	-0.181917	-0.159348	-0.181661	-0.135851	-0.012611	-0.083465	-0.025247	0.116454	0.005662	0.087353	-0.08399	0.036395	-0.104037	-0.211247	-0.380143
chr3R_17679381_17680244	chr3R_17679381_17680244	1	-0.065835	-0.262747	-0.096655	0.060901	0.011419	0.411459	0.419814	0.318937	0.224906	0.158049	0.067997	0.093866	0.117491	-0.029688	0.159201	0.071515	0.12187	0.158525	0.178034	0.333001	0.184401	0.175	0.1182	0.181101	0.230132	0.269398	0.216363	0.030364	0.088694	0.019207	0.042814	-0.127794	-0.079215	-0.11371	-0.143799	0.008387	-0.000465	-0.071174	-0.00738	0.028765	-0.018545	-0.007689	0.024339	0.059532	-0.023776	-0.211263	0.102047
chr3R_18452347_18453334	chr3R_18452347_18453334	1	0.065185	-0.079516	0.116547	0.057639	0.219263	0.236988	0.248695	0.285093	0.309925	0.142245	0.076186	0.112378	0.136608	0.1069	0.069074	0.1731	0.110621	0.326684	0.1877	0.217707	0.163033	0.239203	0.080467	0.17154	0.192423	0.15699	0.177332	0.04372	0.157084	0.017692	0.014611	0.004675	0.044939	-0.042671	-0.037332	0.120196	0.01925	-0.031869	0.004689	0.029637	0.069045	0.384269	0.04784	0.051766	-0.027013	-0.154142	1.11186
chr3R_19152074_19152923	chr3R_19152074_19152923	1	-0.239315	-0.065685	-0.011883	0.150547	0.100554	0.199074	0.107885	0.298159	0.173591	0.142546	0.104789	0.043456	0.097103	0.052803	0.321988	0.259087	0.346468	0.432655	0.375442	0.325126	0.270149	0.160934	0.107912	0.154768	0.246469	0.368961	0.273745	0.061542	0.083236	0.054154	0.069214	-0.173742	-0.058533	-0.138814	-0.059051	-0.044737	0.018306	-0.070093	-0.032148	0.056392	0.079321	-0.032807	0.004545	0.103548	-0.093578	-0.247246	-0.099982
chr3R_19158978_19161318	chr3R_19158978_19161318	1	-0.113628	-0.133107	0.072053	0.123125	0.178913	0.349353	0.222648	0.388224	0.223277	0.166521	0.438664	0.124177	0.191403	0.066497	0.622036	0.229963	0.248641	0.379664	0.328696	0.46801	0.305252	0.157563	0.243711	0.331312	0.673919	0.316273	0.325184	0.104299	0.255663	0.055093	0.078963	-0.084054	0.099487	0.006131	-0.019062	0.2349	-0.004149	-0.00898	0.093186	0.12384	0.033366	0.061666	0.038094	0.072299	0.366918	-0.020835	0.245868
chr3R_19548277_19549171	chr3R_19548277_19549171	1	-0.181037	-0.078817	-0.040205	0.101991	0.107926	0.425312	0.427912	0.39421	0.240768	0.145143	0.074659	0.081756	0.342776	0.367663	0.135731	0.040584	0.178274	0.201153	0.136416	0.315761	0.261233	0.226363	0.541237	0.268322	0.128099	0.221947	0.148185	0.051949	0.109283	0.058187	-0.000468	0.047614	0.078183	-0.071556	-0.128875	-0.022123	0.01054	-0.031614	-0.013143	0.071004	0.020628	0.051212	0.125034	0.033671	0.077932	-0.148953	0.948054
chr3R_19747670_19748777	chr3R_19747670_19748777	1	-0.024621	-0.042638	0.048209	0.254065	0.277793	0.188556	0.353133	0.267879	0.101251	0.052465	0.590109	0.530161	0.309503	0.194562	0.132635	0.149387	0.300929	0.268195	0.244519	0.250674	0.202238	0.13767	0.115892	0.034152	0.171642	0.327999	0.251767	0.084821	0.167239	0.016136	-0.003962	0.163305	-0.013382	-0.031337	-0.076489	0.12666	0.001493	0.017531	0.069271	0.04137	0.037449	0.048664	0.064392	0.05801	0.217114	0.002226	1.8149
chr3R_20398119_20398826	chr3R_20398119_20398826	1	-0.249083	-0.049248	-0.113875	-0.023951	0.17413	0.19424	0.290122	0.226185	0.103315	0.031975	0.096678	0.112377	0.201099	0.175844	0.233446	0.05458	0.123263	0.10466	0.242228	0.14603	0.075808	0.11133	0.171262	0.129113	0.189592	0.126519	0.157841	0.084486	0.084572	0.025532	-0.022127	-0.006947	0.087035	-0.141875	-0.104681	0.05236	0.004505	-0.061288	0.016309	0.014416	0.007032	0.028868	0.122336	-0.010994	0.004366	-0.196897	0.624555
chr3R_22054989_22055441	chr3R_22054989_22055441	1	-0.431842	-0.397151	-0.090875	-0.115011	-0.032582	0.421757	0.360165	0.492861	0.301578	0.199544	0.173806	0.03632	0.146054	-0.024456	-0.005619	0.140512	0.212834	0.180487	0.232569	0.350445	0.226942	0.114861	0.275688	0.243894	0.189965	0.299973	0.200164	0.07461	0.198402	0.020914	0.023938	-0.17733	-0.14714	0.003484	-0.175796	-0.064381	-0.014258	-0.041947	-0.060438	0.092764	-0.003836	-0.018997	0.03506	0.055288	0.067837	-0.324028	0.825095
chr3R_22061227_22061417	chr3R_22061227_22061417	1	-0.689908	-0.562967	-0.038619	-0.156845	-0.084585	0.223942	0.216582	0.360934	0.203588	0.214116	0.074907	-0.015454	0.068408	-0.024097	0.004828	0.128229	0.348086	0.268115	0.33922	0.297768	0.339239	0.064967	0.256371	0.334354	0.221581	0.247933	0.253216	0.063763	0.164039	-0.037204	0.000272	-0.180987	-0.23391	-0.184976	-0.348784	-0.397428	-0.01545	-0.13498	-0.166695	0.006159	0.016471	-0.051862	-0.004949	0.124181	0.195444	-0.005799	0.310441
chr3R_25032387_25033053	chr3R_25032387_25033053	1	-0.117139	-0.057493	0.087266	-0.002007	0.110571	0.416771	0.243949	0.340311	0.241935	0.098044	0.087053	0.028267	0.028622	0.022943	0.114303	0.078562	0.197217	0.11309	0.140225	0.432198	0.212154	0.212433	0.117613	0.328918	0.318276	0.209379	0.156633	0.119242	0.254409	0.096545	0.197362	-0.03673	-0.081999	-0.02343	-0.001784	0.056342	0.020189	-0.017993	-0.058059	0.114856	0.077005	0.030124	-0.022929	0.016215	0.210871	-0.018035	-0.410075
chr3R_25040571_25041313	chr3R_25040571_25041313	1	-0.46383	-0.265413	-0.045773	0.125542	0.128693	0.428899	0.399786	0.299749	0.17375	0.077557	0.376273	0.238708	0.220593	0.168558	0.089604	0.090088	0.185256	0.418902	0.178667	0.254107	0.164951	0.132597	0.178904	-0.069205	0.248816	0.359492	0.24352	0.075474	0.162972	-0.016963	0.066727	-0.0142	-0.069134	-0.202044	-0.217445	-0.112459	-0.003046	-0.10382	-0.096204	0.059046	0.002899	-0.001395	-0.041849	0.024924	-0.114073	-0.322037	1.34041
chr3R_25116955_25117551	chr3R_25116955_25117551	1	-0.142141	-0.163001	-0.044255	-0.059379	0.118404	0.246691	0.214061	0.359955	0.224188	0.160209	0.17384	0.026419	0.076669	-0.028427	0.128574	0.157398	0.036949	0.194292	0.162152	0.267608	0.171557	0.207306	0.178496	0.213522	0.200062	0.233986	0.125643	0.104867	0.004491	0.088385	-0.022194	-0.05574	0.037015	0.032121	-0.024506	0.059935	0.005957	-0.029338	0.03258	0.078138	-0.005047	0.007857	0.066574	0.051884	0.045901	-0.094808	-0.505799
chr3R_25591034_25591804	chr3R_25591034_25591804	1	-0.378209	-0.115802	0.27904	-0.106144	0.197115	0.332067	0.241868	0.27672	0.153791	0.163453	0.081104	0.113906	0.055158	0.045892	0.054649	0.184934	0.276593	0.208102	0.253148	0.30595	0.284897	0.277363	0.281869	0.470067	0.364656	0.234611	0.178594	0.151715	0.246273	0.235099	0.117124	-0.071403	-0.104268	0.041264	-0.129074	0.009447	0.026931	0.024371	0.0012	0.13769	0.023343	0.139031	-0.002275	0.092738	0.293042	0.207724	0.936308
chr3R_25597449_25597984	chr3R_25597449_25597984	1	-0.325861	-0.234618	0.260157	-0.069577	0.06176	0.169249	0.222823	0.378633	0.090627	0.103684	0.461701	0.444837	0.131356	0.024929	0.171285	0.172407	0.451813	0.509908	0.095445	0.653308	0.184571	0.211804	0.167836	0.356103	0.183498	0.236667	0.12409	0.051603	0.154837	0.138401	0.082131	-0.060825	-0.083016	-0.144391	-0.14104	-0.103164	0.002119	-0.072575	-0.020563	0.098343	0.023694	-0.002066	0.043367	0.051201	-0.009102	-0.093725	-0.150167
chr3R_25598447_25598885	chr3R_25598447_25598885	1	-0.337011	-0.198043	-0.068371	-0.040604	-0.022515	0.061139	0.21519	0.342238	0.174258	0.076453	0.376822	0.351988	0.145545	0.072144	0.159889	0.341451	0.360444	0.429329	0.198933	0.032989	0.083258	0.217406	0.108356	0.106863	0.425766	0.38516	0.436308	0.149635	0.354628	0.115444	0.178234	-0.008599	-0.159202	0.001953	-0.11045	0.071617	-0.002856	-0.00478	0.020288	-0.025698	0.051177	0.056377	-0.024843	0.140073	0.246257	0.046787	0.63747
chr3R_26212585_26214036	chr3R_26212585_26214036	1	-0.024079	-0.038004	0.045024	0.196307	0.148495	0.254851	0.427342	0.288308	0.182625	0.085064	0.058893	0.402005	0.151508	0.041651	0.56288	0.183893	0.102701	0.251159	0.202558	0.262332	0.202567	0.283014	0.264716	0.142156	0.164135	0.486536	0.436406	0.082077	0.119141	0.072275	0.03181	0.244182	0.112002	-0.029376	-0.072461	0.040875	0.018265	-0.013089	0.053736	0.080395	0.026898	0.009892	0.112284	0.051441	0.047138	-0.110546	1.59271
chr3R_26601248_26601453	chr3R_26601248_26601453	1	-0.365803	-0.397644	-0.069437	0.086989	0.108969	0.164312	0.239613	0.323859	0.324994	0.12998	0.06979	0.018109	0.082466	-0.008476	0.105373	0.18628	0.195844	0.134374	0.122645	0.145642	0.193553	0.12285	-0.009153	0.187147	0.156874	0.477878	0.410638	0.037452	0.100077	0.012239	-0.014533	-0.386875	-0.174141	-0.15644	-0.179541	-0.297208	-0.022206	-0.117178	-0.114999	0.036429	-0.052143	0.034869	-0.009177	-0.026786	-0.103211	-0.327118	0.427026
chr3R_26625743_26626629	chr3R_26625743_26626629	1	-0.441416	-0.220124	0.00865	0.141834	0.101776	0.233898	0.332955	0.363855	0.22888	0.197857	0.238682	0.115911	0.144237	0.010948	0.295797	0.252556	0.326461	0.369126	0.317279	0.458792	0.242324	0.182145	0.225812	0.222725	0.212923	0.254011	0.198811	0.097851	0.124027	0.046622	0.018464	-0.159192	-0.083628	0.0527	-0.191609	-0.083473	0.009821	-0.002951	-0.013376	0.043072	0.053622	0.014916	0.059535	0.114214	0.255778	0.005424	1.02952
chr3R_27573923_27574347	chr3R_27573923_27574347	1	-0.248642	-0.110326	-0.084798	0.186281	0.191582	0.201495	0.543371	0.237564	0.179797	0.09026	0.32523	0.473813	0.286407	0.120791	0.118273	0.106778	0.456388	0.177902	0.128622	0.255579	0.090418	0.138731	0.040113	0.032067	0.15638	0.207651	0.163614	0.077661	0.145037	0.0298	0.088287	0.17294	0.144167	0.142584	-0.077545	0.007147	0.010029	0.027947	0.068109	-0.015526	0.026259	0.017633	0.135508	0.103907	0.11077	-0.017749	1.34535
chr3R_3931626_3932235	chr3R_3931626_3932235	1	-0.407211	-0.258865	0.086912	0.332671	0.197089	0.187784	0.365073	0.28698	0.108261	0.095824	0.075205	0.156247	0.255169	0.173146	0.138851	0.140589	0.179419	0.147879	0.122936	0.2486	0.073245	0.139582	-0.008857	0.066822	0.187268	0.306133	0.201738	0.05275	0.157568	0.038018	-0.048128	-0.106937	-0.110698	-0.1391	-0.055941	-0.078867	-0.009326	-0.136132	-0.064109	-0.0335	-0.044634	-0.010471	0.007936	0.01208	0.086772	-0.327449	1.63132
chr3R_4485079_4485412	chr3R_4485079_4485412	1	-0.479284	-0.355744	-0.174964	0.105398	0.144958	0.252586	0.287301	0.281088	0.253059	0.011917	0.156905	0.43258	0.222164	0.176553	0.284717	0.053531	0.163886	0.191764	0.174655	0.261369	0.181185	0.165022	0.033098	-0.090712	0.126611	0.226121	0.172765	0.031584	0.076101	-0.01224	-0.014194	-0.048636	-0.068718	-0.308208	-0.102798	-0.204232	-0.018306	-0.147831	-0.105484	0.034101	0.030223	0.038282	0.105814	0.03318	-0.078187	-0.331067	2.02261
chr3R_4880021_4881345	chr3R_4880021_4881345	1	-0.15201	-0.038516	0.103392	0.072442	0.132873	0.131559	0.161625	0.150462	0.117945	0.106859	0.2338	0.192545	0.089957	0.040234	0.480159	0.121401	0.177094	0.338555	0.273334	0.262857	0.283967	0.262684	0.141227	0.246129	0.252587	0.302224	0.248816	0.151351	0.264291	0.08873	0.102528	-0.113264	0.068687	0.02175	-0.051749	0.262834	0.010191	0.041615	0.094383	0.075831	0.052145	0.065422	0.071953	0.030193	0.205019	-0.036	0.568343
chr3R_5061500_5062286	chr3R_5061500_5062286	1	-0.550293	-0.244254	0.114068	0.026533	0.128547	0.286362	0.278207	0.236325	0.174567	0.096528	0.128864	0.30832	0.187262	0.083892	0.129754	0.098088	0.235909	0.257245	0.213656	0.495981	0.269215	0.221537	0.231384	0.243476	0.329695	0.481522	0.353421	0.093662	0.226575	0.020019	0.141532	0.180712	-0.185474	-0.108768	-0.150141	-0.122057	-0.010015	-0.05081	-0.041394	0.10359	0.003569	0.057831	0.065187	0.062882	0.06639	-0.175976	1.6586
chr3R_5178647_5179044	chr3R_5178647_5179044	1	-0.390331	-0.315117	0.14125	0.19528	0.200714	0.218685	0.269801	0.430797	0.209873	0.164071	0.227375	0.127498	0.099642	-0.033822	-0.005844	0.156714	0.190995	0.259909	0.19939	0.319469	0.132352	0.176063	0.036284	0.28368	0.106148	0.381138	0.245029	-0.000376	0.021868	-0.027138	-0.02743	-0.18107	-0.158519	-0.148054	-0.200671	-0.268973	-0.00879	-0.058041	-0.117261	0.071315	-0.030512	-0.06363	-0.021711	0.07815	0.008748	-0.268681	0.056183
chr3R_5376352_5377406	chr3R_5376352_5377406	1	-0.322272	-0.254511	-0.010916	0.318435	0.189179	0.342569	0.431553	0.309013	0.169652	0.063222	0.121619	0.480196	0.240199	0.173882	0.056781	0.057692	0.233791	0.166515	0.209715	0.182644	0.115021	0.178275	0.130998	-0.042102	0.126401	0.184787	0.156891	0.066036	0.093315	0.041797	-0.000344	0.029584	0.023662	-0.155532	-0.147446	-0.014143	0.01777	-0.053791	0.007388	0.034823	-0.034298	0.009687	0.100534	0.032265	0.050784	-0.025985	1.8185
chr3R_5399270_5399437	chr3R_5399270_5399437	1	-0.447853	-0.463671	-0.21024	-0.02497	0.156883	0.328951	0.395176	0.238893	0.32686	0.004068	0.259272	0.469086	0.241672	0.201754	0.062785	0.150157	0.330924	0.133732	0.166132	0.178873	0.14914	0.103146	0.214234	-0.022738	0.100587	0.273516	0.155367	0.049128	0.031227	-0.066933	0.059676	0.323614	0.004543	-0.180463	-0.243839	-0.240944	-0.015619	-0.108192	-0.088045	0.042531	0.069675	-0.017437	0.195341	0.046996	-0.230736	-0.26192	1.50771
chr3R_565254_565648	chr3R_565254_565648	1	-0.269941	-0.291665	-0.062424	0.017612	0.074009	0.273714	0.321591	0.282682	0.3167	0.14146	0.146411	0.195869	0.100854	0.04292	0.477735	0.136229	0.272093	0.205381	0.184483	0.258275	0.203836	0.092582	0.1625	0.110967	0.116681	0.286627	0.203839	0.023384	0.067192	-0.029726	-0.019039	0.063196	-0.114128	-0.132107	-0.314189	-0.012312	-0.003962	-0.038141	-0.060428	0.033267	0.034415	-0.010912	0.137489	0.064273	-0.136525	-0.214939	1.62114
chr3R_5908452_5909265	chr3R_5908452_5909265	1	-0.161998	-0.053923	0.397736	0.097074	0.244216	0.267806	0.479933	0.424174	0.130108	0.144365	0.058819	-0.037012	0.047996	0.032687	0.360422	0.22898	0.197715	0.175861	0.208051	0.299378	0.098234	0.150943	0.314848	0.264464	0.168347	0.204758	0.12208	0.100821	0.058118	0.064177	0.048889	-0.02051	-0.163767	-0.010898	0.01627	0.185462	0.030171	0.037063	0.066398	0.023749	0.032308	-0.018693	-0.027982	0.072153	0.170001	0.047873	1.66355
chr3R_5995918_5996515	chr3R_5995918_5996515	1	-0.125871	-0.129711	0.020895	0.120094	0.158989	0.609411	0.596572	0.487654	0.242882	0.105385	0.102489	0.099949	0.132035	0.110789	0.142341	0.113575	0.217443	0.244908	0.275814	0.181875	0.220616	0.06688	0.429905	0.097563	0.161885	0.210747	0.136915	0.082406	0.108325	0.017791	0.005374	0.082678	-0.083675	-0.063182	-0.081964	-0.064519	0.022365	-0.054765	0.033731	0.068442	0.092362	0.097931	0.09538	0.045494	-0.032851	-0.320193	1.27204
chr3R_6177661_6177901	chr3R_6177661_6177901	1	-0.66617	-0.372098	0.110766	0.051857	0.079809	0.312914	0.340217	0.447666	0.388951	0.174066	0.090307	0.134595	0.165144	0.222443	0.074775	0.042245	0.219811	0.178302	0.160853	0.026559	0.160373	0.133013	0.065473	0.137598	0.188971	0.15142	0.00316	0.01187	-0.009131	-0.027002	0.005141	0.001692	-0.12769	-0.114693	-0.233944	-0.311857	-0.015164	-0.119554	-0.144959	-0.071318	0.05248	0.221421	0.008304	0.028609	-0.070765	-0.283757	0.336739
chr3R_6208868_6210861	chr3R_6208868_6210861	1	-0.523001	-0.284524	0.010803	-0.198864	0.263316	0.315185	0.195996	0.36834	0.002106	0.103927	0.13005	0.050371	0.145935	0.032774	0.48996	0.112093	0.193013	0.376747	0.307658	0.273192	0.237564	0.232636	0.100461	0.498651	0.249804	0.635679	0.620962	0.145581	0.182858	0.05921	0.136435	-0.21907	-0.152561	-0.222286	-0.257139	-0.272124	0.013229	-0.104807	-0.140763	0.092843	0.166132	0.226645	0.020936	0.150721	0.236351	-0.130376	0.177622
chr3R_6212651_6213093	chr3R_6212651_6213093	1	-0.741096	-0.342886	-0.188712	-0.333647	-0.072352	0.10065	0.157132	0.283318	-0.035134	0.039731	0.101212	-0.005266	0.121272	-0.01752	0.06771	0.062669	0.185705	0.204918	0.226821	0.234152	-0.023013	0.142698	-0.094508	0.394263	0.251199	0.666031	0.606098	0.074745	0.17492	0.075959	0.121915	-0.45162	-0.365979	-0.238131	-0.292727	-0.366011	0.009259	-0.147174	-0.137844	-0.047368	0.109115	0.011212	-0.064257	0.125316	0.240669	-0.135006	-0.085468
chr3R_6213513_6214102	chr3R_6213513_6214102	1	-0.601731	-0.38472	-0.040727	0.020043	0.239476	0.239555	0.207321	0.291462	-0.143927	0.012747	0.122115	0.002498	0.14079	0.004716	0.488369	0.112154	0.115442	0.376805	0.221957	0.185173	0.237963	0.231444	0.223817	0.47684	0.153156	0.373197	0.321201	0.119875	0.062847	0.029078	0.086276	-0.349434	-0.141237	-0.374512	-0.231265	-0.341928	0.012078	-0.104913	-0.141831	0.09385	0.084559	0.226645	0.025746	0.138625	-0.019583	-0.192657	1.05429
chr3R_6216655_6216999	chr3R_6216655_6216999	1	-0.662276	-0.349575	0.102983	0.061263	0.011597	0.342894	0.153166	0.196682	0.07086	0.150983	0.084282	0.065357	0.069116	0.010754	0.047806	0.06669	0.091824	0.16809	0.33799	0.188665	0.174577	0.172369	-0.044456	0.327458	0.25246	0.21263	0.168183	0.077526	0.116058	-0.020102	0.042047	-0.242432	-0.23545	-0.113076	-0.253136	-0.263925	-9.4e-05	-0.130142	-0.089476	-0.01726	-0.017265	-0.023277	-0.069135	0.020022	0.262247	-0.249421	0.191322
chr3R_62178_62525	chr3R_62178_62525	1	-0.397828	-0.408491	0.002789	0.223116	0.286409	0.345283	0.313485	0.29536	0.221694	0.152254	0.123586	0.052193	-0.034333	-0.062987	0.1517	0.040409	0.253208	0.146842	0.254208	0.190865	0.227304	0.049173	0.038485	0.227353	0.146856	0.251403	0.126885	-0.018152	-0.024111	-0.045125	0.009403	0.060574	0.302407	-0.054575	-0.250879	-0.136397	0.019156	-0.084942	-0.122088	0.08806	-0.030097	-0.147463	0.268634	-0.066269	0.126875	-0.135624	0.605352
chr3R_8268489_8268990	chr3R_8268489_8268990	1	-0.285738	-0.08731	-0.048126	0.019796	0.107481	0.452171	0.477133	0.352417	0.449104	0.095477	0.173298	0.284796	0.163548	0.240653	0.208218	0.047466	0.262564	0.189657	0.224362	0.347806	0.229011	0.1258	0.20564	0.089945	0.27005	0.401347	0.312658	0.08439	0.207125	0.053056	0.08984	0.058566	-0.000394	-0.020815	-0.126834	0.007644	0.005963	-0.050766	0.006029	0.108969	0.026405	-0.043571	0.157817	0.049027	-0.032026	-0.075637	0.997569
chr3R_8843131_8843807	chr3R_8843131_8843807	1	-0.216947	-0.21584	-0.115069	-0.022376	0.07333	0.398816	0.522456	0.59845	0.5716	0.28771	0.251232	0.125386	0.181477	0.032391	0.000652	0.189699	0.247548	0.238489	0.344794	0.40084	0.194236	0.131439	0.081124	0.148837	0.242083	0.33218	0.229798	0.094534	0.190065	0.091221	0.11368	-0.053967	-0.086904	-0.043357	-0.114087	-0.166397	0.01059	-0.089224	-0.019355	0.055897	0.000489	-0.016619	0.075913	0.085645	-0.049622	-0.216466	0.668042
chr3R_9470615_9470969	chr3R_9470615_9470969	1	-0.291272	-0.131857	-0.060128	0.057788	0.16394	0.228634	0.414753	0.211103	0.249206	0.039381	0.084566	0.207285	0.131939	0.003211	0.049298	0.048384	0.131546	0.119184	0.057012	0.00808	0.077085	0.119678	0.00713	0.189032	0.147504	0.610143	0.480935	0.062709	0.098168	0.005391	0.016116	-0.016361	0.110663	-0.189662	-0.106169	0.028913	-0.004925	-0.058225	-0.013835	-0.006183	0.043262	0.03341	0.11893	0.015515	-0.000828	-0.207368	1.26342
chr3R_9509840_9510052	chr3R_9509840_9510052	1	-0.267385	-0.173458	-0.121682	0.046585	0.108084	0.211043	0.424387	0.266681	0.183414	0.067973	0.617621	0.535167	0.316151	0.177974	0.035683	0.046813	0.165718	0.149028	0.186647	0.21238	0.092742	0.042962	0.115644	0.009395	0.018155	0.126142	0.148081	0.056858	0.069417	-0.004162	0.032261	0.134169	-0.105095	-0.086581	-0.152976	-0.078189	0.002705	-0.06168	-0.036693	0.001443	0.029365	0.103318	0.046105	0.06228	0.116379	-0.033496	1.59865
chrX_10661472_10661628	chrX_10661472_10661628	1	-0.488502	-0.136908	-0.197484	0.015789	0.104152	0.336133	0.376254	0.27857	0.271753	0.048786	0.128455	0.33711	0.240003	0.135407	0.241068	0.109662	0.231741	0.161355	0.134983	0.182694	0.139887	0.115341	0.194736	-0.024481	0.170149	0.180037	0.108391	0.067104	0.134694	-0.00805	0.053451	-0.17011	-0.113158	-0.232404	-0.255025	-0.208852	-0.005714	-0.123642	-0.095177	0.017088	-0.013648	-0.008608	0.130591	0.180845	-0.055344	-0.202557	1.63653
chrX_10699232_10700301	chrX_10699232_10700301	1	-0.139396	-0.231827	0.255595	0.271043	0.290176	0.32262	0.333172	0.327346	0.381304	0.13073	0.680237	0.493078	0.223396	0.082134	0.132235	0.196457	0.236202	0.152108	0.179691	0.128287	0.123053	0.169441	0.074456	0.160066	0.274118	0.355018	0.143775	0.035879	0.159	-0.005579	0.025622	-0.023629	-0.01726	-0.018225	-0.054101	0.042392	0.006106	-0.039323	0.046037	0.022465	0.053193	0.003821	0.097775	0.185547	0.163643	-0.034414	1.28312
chrX_12629134_12629665	chrX_12629134_12629665	1	-0.597594	-0.348607	-0.279123	-0.139822	-0.037384	0.124075	-0.032511	0.198697	0.011264	0.030675	0.212384	0.139869	0.246584	0.09316	0.396934	0.388836	0.340168	0.501626	0.255951	0.562988	0.257057	0.307759	0.293515	0.120189	0.413239	0.487339	0.453891	0.175946	0.413792	0.060494	0.164724	-0.298308	-0.287357	-0.374944	-0.265731	-0.149788	-0.013708	-0.090654	-0.041316	0.165342	0.027825	0.127611	0.191189	0.389693	0.096929	-0.170868	-0.438397
chrX_12629882_12630443	chrX_12629882_12630443	1	-0.879486	-0.3802	-0.250787	-0.195114	-0.091236	0.061637	0.071199	0.213822	0.040454	0.027903	0.197979	0.07055	0.198813	0.008729	0.258489	0.341111	0.302552	0.397957	0.220044	0.535624	0.020533	0.155683	0.179383	0.078008	0.410609	0.415553	0.410307	0.1523	0.292114	0.017444	0.125968	-0.454237	-0.374272	-0.377208	-0.372827	-0.151509	-0.037585	-0.128774	-0.019629	-0.002256	-0.006059	0.084345	0.103065	0.328016	0.183307	-0.035456	-0.371004
chrX_12646483_12646735	chrX_12646483_12646735	1	-0.418102	-0.422615	-0.145984	-0.131281	-0.044711	0.212127	0.149326	0.376521	0.228922	0.145851	0.173863	0.031975	0.065135	0.025821	0.15245	0.149251	0.179829	0.225359	0.157109	0.268335	0.13183	0.245792	0.037283	0.303756	0.229643	0.251074	0.204958	0.006353	0.124206	-0.018946	0.033136	-0.254593	-0.074483	-0.206319	-0.205388	-0.283503	-0.003918	-0.120837	-0.116714	0.043011	-0.041518	-0.014157	0.009325	0.071488	0.024181	-0.197694	-0.174697
chrX_12647625_12648498	chrX_12647625_12648498	1	-0.266384	-0.242382	-0.112708	-0.151127	-0.113471	0.325326	0.162472	0.266388	0.246445	0.179079	0.2526	0.069171	0.142088	0.102347	0.263876	0.254298	0.224333	0.396561	0.250147	0.368126	0.265712	0.293341	0.237515	0.177515	0.458084	0.405839	0.44832	0.120589	0.501587	0.019471	0.162459	-0.095525	-0.085472	-0.06156	-0.091439	0.018265	0.000276	-0.042015	0.0001	0.09802	0.060311	0.124713	0.094965	0.171173	-0.05844	-0.153835	-0.234417
chrX_12649090_12649260	chrX_12649090_12649260	1	-0.59669	-0.225424	-0.19511	-0.236977	-0.184108	0.264173	0.160389	0.269145	0.210215	0.104057	0.111112	0.04943	0.08182	0.053767	0.188689	0.110351	0.125184	0.301726	0.182455	0.272594	0.157324	0.119293	0.109632	0.198118	0.249003	0.24749	0.264191	0.079674	0.27458	0.012815	0.047889	-0.298489	-0.257735	-0.012193	-0.274	-0.224516	-0.006775	-0.108453	-0.062324	0.005954	0.039381	0.078015	0.024915	0.172513	0.123862	-0.066133	-0.119913
chrX_14733895_14734402	chrX_14733895_14734402	1	-0.250798	-0.155727	-0.119738	0.056143	0.113671	0.449394	0.41327	0.243469	0.213801	0.054275	0.354134	0.397675	0.336546	0.323979	0.186432	0.055852	0.205335	0.205853	0.194522	0.370273	0.27882	0.152827	0.191671	0.062569	0.28582	0.227435	0.173935	0.114548	0.236127	0.080504	0.12529	0.068794	-0.156122	-0.140366	-0.130176	-0.051942	0.020905	-0.079461	-0.051226	0.106881	0.212879	0.317031	0.109454	0.158769	0.139487	-0.120472	1.28046
chrX_15227252_15227510	chrX_15227252_15227510	1	-0.249935	-0.240214	-0.097375	0.019443	0.158446	0.169236	0.219891	0.108164	0.554008	0.026069	0.836398	0.729696	0.308288	0.266051	0.109029	0.113898	0.219999	0.266495	0.165315	0.127655	0.118766	0.210403	0.070626	0.084803	0.041307	0.173271	0.125514	0.061696	0.094812	0.013115	0.053104	0.421353	-0.060443	0.019213	-0.158581	0.079506	0.002764	-0.021264	0.048265	0.025517	-0.022725	0.016645	0.301607	0.396081	0.004909	0.077777	1.26466
chrX_15707342_15707689	chrX_15707342_15707689	1	-0.277513	-0.121547	-0.071356	0.085744	0.097488	0.404137	0.475833	0.311206	0.523452	0.187619	0.320647	0.258399	0.094331	0.040824	0.032364	0.122242	0.191904	0.245266	0.121744	0.202537	0.213281	0.328381	0.113072	-0.027018	0.112193	0.249652	0.213557	0.058136	0.062083	0.04651	0.042068	0.058856	0.03521	-0.105071	-0.143875	0.057906	0.019607	-0.080734	0.015849	0.066287	0.039045	2.7e-05	-0.051921	0.234766	-0.103592	-0.120697	1.49978
chrX_16227393_16227684	chrX_16227393_16227684	1	-0.31524	-0.056336	-0.202513	-0.027748	-0.057541	0.385686	0.441357	0.323776	0.260987	0.049582	0.159436	0.201892	0.058419	-0.020151	0.049037	0.106255	0.13609	0.149734	0.154145	0.085425	0.156995	0.17157	0.054909	0.010798	0.148011	0.213522	0.171655	0.064594	0.027735	0.031623	0.006743	0.043693	-0.140225	-0.176684	-0.15912	-0.11157	-0.008283	-0.103108	-0.077263	-0.002511	-0.025937	0.027908	0.06003	0.125635	-0.041569	-0.218509	1.01025
chrX_19055863_19056099	chrX_19055863_19056099	1	-0.126204	-0.252825	0.154986	-0.051214	0.10468	0.375521	0.185572	0.394223	0.365304	0.212527	0.187739	0.101152	0.078873	0.077375	0.053557	0.116484	0.069858	0.11718	0.183582	0.276222	0.364839	0.248046	0.222544	0.242498	0.197599	0.202461	0.163128	0.046278	0.215679	-0.044745	-0.078804	-0.060601	-0.083874	-0.110026	-0.144324	-0.094129	-0.006704	-0.040919	0.01071	0.091943	0.044931	0.106161	0.010996	0.063828	-0.187463	-0.235316	0.081607
chrX_1965607_1966389	chrX_1965607_1966389	1	-0.131645	-0.03956	0.048078	0.231728	0.369577	0.478376	0.61142	0.510039	0.724299	0.255854	0.093977	0.114414	0.088441	0.040913	0.278465	0.057339	0.34612	0.238112	0.213489	0.262173	0.296089	0.114773	0.055252	0.183656	0.207677	0.195266	0.130527	0.079167	0.153898	0.009438	0.043913	0.207152	-0.026589	0.072574	0.000989	-0.006125	0.029976	-0.006272	-0.001017	0.054604	0.017068	0.019625	0.238018	0.26934	0.249348	-0.017305	1.63918
chrX_19744933_19745734	chrX_19744933_19745734	1	-0.255067	-0.256359	0.093403	0.344072	0.379986	0.32002	0.606937	0.43822	0.609779	0.200075	0.225212	0.269916	0.3259	0.216658	0.08399	0.180421	0.192189	0.174462	0.086034	0.097958	0.093931	0.198041	0.079966	0.048082	0.101921	0.204134	0.123361	0.053779	0.084732	0.023777	-0.023795	0.259338	-0.006691	0.108437	-0.072442	0.124264	0.007504	0.043674	0.115607	0.032939	0.025646	0.040697	0.142042	0.372714	0.122349	-0.002203	1.70004
chrX_20052865_20053398	chrX_20052865_20053398	1	-0.088652	-0.150699	-0.06201	0.196332	0.221261	0.38376	0.364588	0.218641	0.514887	0.045898	0.338054	0.354156	0.189973	0.082948	0.079414	0.206086	0.154481	0.276922	0.130747	0.175115	0.134663	0.221014	0.165199	-0.019304	0.134945	0.177752	0.129503	0.066686	0.132228	0.010384	0.065746	0.042956	0.091489	0.026262	-0.024204	0.007246	0.000234	0.016418	0.009619	0.095962	-0.016608	-0.011554	0.254259	0.536579	0.07585	0.041994	1.4858
chrX_2017137_2018065	chrX_2017137_2018065	1	-0.150671	-0.177772	-0.059741	0.134516	0.068444	0.204638	0.236181	0.167072	0.264261	-0.013543	0.15888	0.134183	0.130494	0.084736	0.526973	0.229444	0.256825	0.351445	0.184167	0.149545	0.164761	0.222287	0.217488	-0.008942	0.697187	0.730651	0.684596	0.206387	0.522282	0.317925	0.700348	-0.031591	0.038068	-0.092069	0.029906	0.175407	0.011665	-0.027584	0.071132	0.028546	0.095287	0.063083	0.208546	0.400384	0.030747	0.019053	0.807109
chrX_2030775_2032735	chrX_2030775_2032735	1	-0.207759	-0.018451	0.169269	-0.013717	0.137454	0.132142	0.106923	0.205429	0.191984	0.002932	0.177234	0.160477	0.139498	0.076988	0.584996	0.322446	0.271589	0.340545	0.201786	0.346078	0.291874	0.21132	0.284703	0.264332	0.815415	0.894387	0.852045	0.221816	0.51226	0.554782	0.698854	0.055851	0.022285	-0.002117	0.077101	0.120599	0.016963	-0.010535	0.066907	0.208245	0.08521	0.058628	0.226776	0.292483	0.069156	0.03352	0.400505
chrX_2035304_2035654	chrX_2035304_2035654	1	-0.160182	-0.137187	-0.047791	-0.055932	0.074001	0.343273	0.302942	0.26204	0.261755	0.062042	0.201458	0.140395	0.084148	0.179135	-0.006367	0.128196	0.170561	0.163339	0.164442	0.195716	0.19146	0.16093	0.063615	0.044638	0.29831	0.210056	0.114475	0.07281	0.184401	0.128587	0.119853	0.212966	-0.018075	-0.108471	-0.054499	0.118969	-0.001292	-0.011952	-0.015273	0.062647	0.033369	0.030784	0.095748	0.090559	-0.071207	-0.12074	0.675793
chrX_2230131_2230728	chrX_2230131_2230728	1	-0.077825	-0.035364	-0.003084	-0.058343	0.05763	0.220666	0.105094	0.221168	0.287852	0.156473	0.07426	0.092713	0.103105	0.048378	0.064503	0.129352	0.093796	0.134671	0.1585	0.207032	0.164099	0.179577	0.207971	0.210018	0.201575	0.149991	0.149659	0.083317	0.258963	0.044232	0.120887	0.011243	0.089836	0.057623	0.022546	0.175836	0.009363	0.026158	0.071682	0.008693	0.087953	0.023956	0.054336	0.05009	0.02613	-0.00052	0.155952
chrX_3566170_3566678	chrX_3566170_3566678	1	-0.394183	-0.248025	-0.136699	-0.057782	0.053403	0.157147	0.323126	0.317363	0.249126	0.074861	0.182485	0.348703	0.153045	0.060726	0.044047	0.049996	0.117842	0.129512	0.310334	0.127472	0.058202	0.106147	-0.006505	0.155516	0.057292	0.110136	0.160633	0.055008	0.006099	-0.044111	0.001506	-0.002662	0.047667	-0.134504	-0.136362	0.028156	0.025146	-0.061017	-0.039972	-0.006528	0.003501	-0.014449	0.078257	0.038577	-0.159517	-0.260089	0.595604
chrX_3614462_3614657	chrX_3614462_3614657	1	-0.380102	-0.291886	0.078715	0.209724	0.216976	0.136623	0.321112	0.155768	0.051756	0.043767	0.106935	0.22599	0.256118	0.215281	0.195719	0.166897	0.229395	0.129956	0.086937	0.044907	0.079405	0.208146	0.091063	-0.022231	0.102613	0.157867	0.120064	0.062611	0.115442	-0.038729	-0.033298	-0.043357	-0.033504	-0.193245	-0.074168	-0.216237	-0.019267	-0.130783	-0.059904	0.015513	0.075659	0.06676	0.020501	0.092604	-0.068829	-0.231994	1.22657
chrX_3666544_3668532	chrX_3666544_3668532	1	-0.11426	-0.103437	0.049419	-0.006798	0.106609	0.148106	0.207197	0.271475	0.299703	0.181129	0.163015	0.165368	0.077731	0.056443	0.12897	0.086044	0.139264	0.187948	0.152226	0.184012	0.188973	0.176887	0.160306	0.182691	0.324232	0.196941	0.225097	0.058231	0.130184	0.03106	0.059806	-0.034602	0.064266	0.029022	-0.03768	0.209018	0.027135	-0.001129	0.060397	0.086074	0.041117	0.061747	0.045181	0.097945	0.028075	-0.124505	0.338912
chrX_5639576_5639905	chrX_5639576_5639905	1	-0.18475	-0.230925	-0.031966	0.143255	0.271765	0.329143	0.396703	0.220516	0.485198	0.042217	0.709809	0.670304	0.328838	0.225966	0.133594	0.165102	0.249328	0.261719	0.171078	0.305314	0.249446	0.098249	0.033774	-0.057697	0.17141	0.254647	0.185971	0.06339	0.247342	0.029021	0.053667	0.314117	-0.091887	-0.069969	-0.147923	0.1107	0.012945	-0.018573	-0.002434	0.054185	0.034755	0.030131	0.20839	0.38275	0.127525	-0.094226	1.70348
chrX_7951870_7952183	chrX_7951870_7952183	1	-0.33384	-0.167794	-0.110788	0.076943	0.124222	0.242135	0.282546	0.22094	0.224918	0.048346	0.14573	0.197058	0.051754	0.065598	0.17034	0.097952	0.11573	0.120898	0.277835	0.165084	0.09206	0.109941	0.048479	-0.012002	0.120639	0.233114	0.156228	0.080552	0.037666	-0.001608	-0.039253	-0.085058	-0.080423	-0.171219	-0.095474	0.005209	-0.016263	-0.077801	-0.034455	-0.018358	0.027928	0.053507	0.045647	0.156847	-0.10671	-0.372803	1.07945
chrX_7957125_7957503	chrX_7957125_7957503	1	-0.314368	-0.07295	-0.120984	0.008715	0.046118	0.226303	0.279113	0.20307	0.285736	0.017929	0.084104	0.110653	0.175932	0.140589	0.070901	0.165413	0.093198	0.19682	0.104393	0.075345	0.145528	0.073494	0.090205	0.008548	0.132492	0.237802	0.157504	0.194405	0.200702	0.042209	0.010349	-0.085792	-0.061117	-0.148934	-0.013607	-0.140854	-0.005878	-0.082167	-0.00676	0.024613	0.040491	0.00186	0.170744	0.430658	0.084488	-0.059657	1.4061
chrX_7986091_7987702	chrX_7986091_7987702	1	-0.154792	-0.09751	-0.01498	-0.007422	0.152791	0.312441	0.304413	0.345585	0.297598	0.183344	0.125976	0.421949	0.356485	0.298436	0.502147	0.128377	0.180666	0.20813	0.164134	0.283332	0.182554	0.280055	0.260163	0.063835	0.285071	0.250958	0.231814	0.050981	0.217435	0.008449	0.073627	0.149788	0.046724	-0.019229	0.005721	0.11707	0.004223	-0.004699	0.015348	0.071839	0.069142	0.204999	0.151345	0.244574	0.023818	-0.130087	1.18339
chrX_8314598_8315569	chrX_8314598_8315569	1	-0.163727	-0.168404	0.057621	0.030206	0.031737	0.227258	0.3814	0.311142	0.458676	0.188185	0.114881	0.12588	0.077471	0.012056	0.186308	0.141148	0.169006	0.187111	0.197491	0.288812	0.108344	0.180418	0.127667	0.245736	0.175571	0.22738	0.131939	0.030911	0.100394	0.029503	0.019929	0.079417	0.083625	0.104578	-0.104231	-0.011791	0.021443	-0.025616	0.034818	0.040668	0.008504	0.005639	0.040445	0.182551	-0.009649	-0.126098	0.477016
chrX_8787843_8788980	chrX_8787843_8788980	1	-0.452415	-0.244017	-0.135465	-0.011177	0.17621	0.298094	0.3813	0.454423	0.568254	0.324847	0.133015	0.273297	0.114162	0.064865	0.152494	0.12121	0.157596	0.139298	0.149181	0.205045	0.219241	0.182928	0.175943	0.202879	0.188388	0.20331	0.143093	0.094026	0.035915	0.051759	-0.005672	-0.034612	-0.03691	0.037676	-0.027983	0.030976	0.011113	-0.043105	0.037117	0.144787	0.036451	-0.007616	0.135308	0.134277	-0.069044	-0.217106	0.195604
chr2L_11445690_11445945	chr2L_11445690_11445945	2	-0.084799	0.643741	-0.056465	-0.041696	-0.006935	-0.010522	0.028625	-0.027997	0.022543	-0.085784	0.031298	0.003508	0.015888	-0.0361	0.013273	0.133359	0.011802	0.089826	0.070065	0.101363	0.029503	0.110863	0.055996	0.304424	0.64715	0.54318	0.318907	0.33067	0.509051	0.522145	0.60593	-0.077255	-0.062007	0.007346	-0.115561	0.039456	-0.007222	-0.005117	0.041138	0.026912	-0.033505	0.003469	-0.016852	0.007028	0.096926	-0.025023	0.063364
chr2L_11447657_11447968	chr2L_11447657_11447968	2	-0.211425	0.556255	-0.175452	-0.037174	-0.04449	0.02073	-0.088037	-0.002282	-0.086964	-0.146091	0.06913	0.044775	0.074927	-0.00128	-0.005139	0.180445	-0.003948	0.108458	0.105906	0.147682	0.120008	0.043723	0.048012	0.323879	0.876644	0.769593	0.645255	0.531432	0.748164	0.627271	0.871423	-0.22764	-0.148327	-0.192304	-0.093517	-0.103138	-0.012178	-0.042024	0.034769	0.003346	-0.064249	0.03013	-0.106418	-0.017951	0.158608	0.076472	-0.013496
chr2L_12586909_12587251	chr2L_12586909_12587251	2	-0.080206	0.101884	-0.086985	-0.121717	0.002183	-0.027474	-0.050903	0.072604	-0.11092	-0.127645	0.092636	-0.026363	0.025606	-0.032736	0.018716	0.123985	-0.003273	-0.007307	0.047628	0.001811	0.025538	0.139679	0.076188	0.219085	0.620666	0.585112	0.321006	0.253146	0.372251	0.479627	0.588729	-0.037907	-0.082481	-0.144842	0.032592	-0.024887	-0.005928	-0.043319	-0.073239	-0.040066	0.010059	0.00356	-0.083144	0.067085	-0.012466	-0.109603	0.367671
chr2L_12617996_12618328	chr2L_12617996_12618328	2	-0.477556	0.223499	-0.169132	-0.270998	-0.115106	-0.017438	-0.151768	-0.007857	-0.145998	-0.183928	0.093109	-0.052937	0.040591	-0.002823	0.14773	0.245918	0.014276	0.17447	0.067601	0.090078	0.106763	0.008814	-0.006873	0.367784	0.804586	0.849165	0.646349	0.455452	0.60774	0.699093	0.935432	-0.228695	-0.21325	-0.213124	-0.090465	-0.299277	-0.015951	-0.043313	-0.079988	0.024394	0.00013	0.050476	-0.094637	-0.011512	0.203962	0.174086	0.510942
chr2L_14490310_14490879	chr2L_14490310_14490879	2	-0.245387	0.259064	-0.048105	-0.084557	-0.046911	-0.038739	-0.013839	-0.040322	-0.071304	-0.065986	0.044178	-0.043719	0.01247	0.022642	0.035163	0.113862	0.249268	0.211585	0.124096	-0.003288	0.013619	0.141307	0.073795	0.243715	0.761588	0.731185	0.563395	0.307284	0.586959	0.463648	0.687517	-0.099948	-0.074519	-0.081511	-0.071074	0.087116	-0.002901	0.040058	0.059437	-0.047473	-0.012328	0.070756	0.039179	0.107853	0.204126	0.035994	0.163923
chr2L_16422660_16423212	chr2L_16422660_16423212	2	-0.073035	0.33962	0.061109	-0.051482	-0.047632	0.188778	0.002214	0.040611	-0.046401	-0.045936	0.08598	0.003053	0.096062	0.062244	-0.044501	0.167295	0.183897	0.110497	0.136274	0.290871	0.084507	0.242513	0.208982	0.300779	0.819268	0.705343	0.537134	0.420324	0.616889	0.622153	0.817028	-0.084717	-0.073876	-0.070724	-0.022548	0.013265	0.018151	0.069486	0.069194	0.120014	0.152233	0.16439	-0.049921	0.051953	0.106559	0.035095	0.06575
chr2L_1644431_1644667	chr2L_1644431_1644667	2	-0.110883	0.259458	0.21261	-0.025105	0.041908	0.009144	-0.043836	-0.019696	-0.160757	-0.038518	0.084786	0.011363	0.060746	0.00048	0.022743	0.186667	0.060032	0.050174	0.035585	0.009918	0.114528	0.107747	0.029704	0.214205	0.714397	0.834577	0.714679	0.706706	0.864468	0.592788	0.763583	-0.201076	0.030312	-0.091393	-0.11544	-0.032821	0.008943	-0.047748	0.005051	0.013822	-0.04341	0.009278	-0.067608	-0.009518	-0.173648	-0.215299	-0.054367
chr2L_20770465_20770669	chr2L_20770465_20770669	2	-0.01851	0.676858	-0.019981	-0.09634	-0.171933	0.016025	-0.054016	-0.068092	-0.129187	-0.085498	0.132859	0.078799	0.022074	0.021247	0.006031	0.126254	-0.059632	-0.003354	0.06108	0.05316	0.023392	0.094332	-0.024232	0.256339	0.720156	0.683016	0.590937	0.400664	0.582703	0.576808	0.46336	0.018099	-0.111262	0.024278	-0.050525	0.023037	-0.009217	-0.016855	0.042307	-0.002151	-0.040074	-0.07553	0.001398	0.030828	0.117922	0.14018	-0.183728
chr2L_5403627_5403844	chr2L_5403627_5403844	2	-0.27012	-0.050825	-0.147495	-0.147877	-0.044726	-0.109391	-0.10529	-0.003543	-0.052804	-0.065727	0.025469	-0.050652	0.039074	0.020886	0.110564	0.071106	-0.044039	0.147605	-0.006531	-0.014324	0.045839	0.057511	-0.102453	0.107483	0.684975	0.872034	0.726112	0.290965	0.443503	0.45357	0.690605	-0.118982	-0.019949	-0.158849	-0.047406	-0.111049	0.009721	-0.024576	0.002236	-0.027385	-0.034183	-0.007009	-0.096634	-0.002171	-0.014075	-0.008217	-0.150391
chr2L_5461196_5461610	chr2L_5461196_5461610	2	-0.107247	0.322367	-0.069613	0.033412	0.038556	0.015484	0.011904	-0.012838	-0.010609	-0.087248	0.029415	0.038069	0.080792	-0.017083	0.071045	0.044994	0.021636	0.092213	0.021668	0.042255	0.032756	0.073182	0.075213	0.217669	0.694113	0.713276	0.546148	0.417535	0.621568	0.570848	0.687661	-0.03086	0.102025	0.06847	-0.064956	0.115245	0.010788	0.078166	0.094017	0.055204	0.020634	0.003169	0.01005	0.113779	0.210271	0.302393	0.212315
chr2L_5707_5974	chr2L_5707_5974	2	-0.144469	0.471562	-0.054956	-0.107944	-0.129859	0.0057	-0.177069	0.017237	-0.122608	-0.13878	0.02429	-0.055654	0.027281	-0.000866	-0.065675	0.148923	-0.070666	0.015825	-0.067377	-0.019023	0.055643	0.046895	-0.04093	0.264879	0.443424	0.671091	0.518633	0.264479	0.324986	0.485948	0.336684	-0.079967	-0.130494	-0.211229	0.070012	0.091361	-0.037936	-0.024561	0.024557	-0.01953	0.035588	-0.059997	0.053612	-0.075943	-0.063219	-0.226648	-0.002944
chr2L_594722_595115	chr2L_594722_595115	2	-0.167114	0.753447	-0.173973	-0.263122	-0.347637	0.133171	0.025345	-0.148217	-0.21589	-0.147744	0.002168	-0.044673	0.046674	-0.048173	0.139369	0.063112	0.048028	0.020095	0.020589	0.178415	0.186663	-0.162295	0.09408	0.35396	0.734993	0.676564	0.594353	0.399377	0.671468	0.608653	0.704936	-0.186129	-0.233627	0.067646	-0.195385	-0.286742	-0.024645	0.053007	0.001075	0.107497	-0.038892	-0.03957	-0.129606	0.02521	0.284867	0.217925	0.44925
chr2R_10345469_10345911	chr2R_10345469_10345911	2	-0.334318	0.458742	-0.083282	-0.054566	0.024099	0.070904	0.054612	-0.021607	0.024097	-0.113833	0.054876	0.01961	0.065618	0.04101	0.082869	0.186376	0.031106	0.053487	0.05549	0.132437	0.125937	0.162773	0.253945	0.293442	0.978479	0.774217	0.680313	0.530083	0.857978	0.717598	0.863166	-0.067171	0.002754	-0.045438	-0.058945	0.130323	0.015475	0.017059	0.046	0.003893	-0.003661	-0.007968	-0.090656	0.029623	0.295707	0.177731	0.269935
chr2R_10686599_10686827	chr2R_10686599_10686827	2	-0.133216	0.32945	0.02291	-0.090119	-0.266992	0.052667	-0.062314	-0.05439	0.030689	-0.029151	0.007774	0.028894	0.014034	0.051174	0.026697	0.067411	0.039445	0.055711	0.00392	-0.052123	0.137543	0.07659	0.002717	0.19759	0.612859	0.457363	0.314979	0.305749	0.459854	0.449749	0.838388	-0.01637	-0.105298	-0.05044	-0.128463	-0.086995	-0.022178	-0.016255	-0.031367	-0.00297	0.07763	0.034812	-0.08565	0.038339	0.111746	0.167797	0.618135
chr2R_15156343_15156600	chr2R_15156343_15156600	2	-0.119121	0.474996	-0.100674	-0.047165	0.014197	-0.008627	-0.046548	0.02459	0.022758	-0.082454	0.041015	0.073673	0.043448	0.044565	0.053896	0.132443	-0.006325	0.045238	0.034655	-0.008476	0.142807	0.012973	0.144209	0.290159	0.665396	0.820061	0.759842	0.839124	0.978792	0.693522	0.92492	-0.057638	0.000547	-0.057665	-0.049323	-0.138018	0.019181	-0.035192	0.013075	-0.061732	0.028138	0.042102	0.087652	0.063778	0.12164	-0.041518	0.301754
chr2R_1614279_1614761	chr2R_1614279_1614761	2	-0.020889	0.433584	0.063185	0.047568	-0.100762	0.026158	0.097872	-0.043153	0.117989	-0.040559	0.125749	0.039435	0.052896	0.040023	0.075023	0.117943	0.05887	0.087824	0.066327	0.037553	0.115972	0.059732	0.076829	0.232103	0.781991	0.768264	0.703252	0.388331	0.571081	0.613501	0.619498	-0.026712	-0.027469	0.122976	-0.007002	0.115632	0.021925	0.083571	0.100882	-0.008484	0.050217	0.030257	0.074287	0.087142	0.142272	0.23257	0.972617
chr2R_18129449_18129918	chr2R_18129449_18129918	2	-0.163093	0.456129	-0.052385	-0.117432	0.054033	0.0102	-0.012193	0.018464	-0.064551	-0.091301	0.075865	0.041317	0.067957	0.045609	0.029433	0.205452	0.038018	0.052196	0.09587	0.108616	0.046998	0.095161	-0.053136	0.2968	0.881599	0.778382	0.680477	0.46752	0.705761	0.657105	0.79037	-0.17751	0.005304	-0.001921	-0.065368	0.09577	0.019774	0.024138	0.054995	0.029819	0.043341	0.038337	0.023079	0.025402	0.226791	0.05577	0.653271
chr2R_18130326_18130838	chr2R_18130326_18130838	2	-0.110033	0.515057	0.090037	0.005298	0.02335	0.066138	-0.009932	0.058573	0.158384	-0.02398	0.07935	0.044841	0.065077	0.02523	0.044696	0.18792	0.044972	0.060802	0.090131	-0.014837	0.051751	0.143651	-0.017098	0.320886	0.653572	0.544745	0.519619	0.399909	0.510128	0.626648	0.676203	-0.019131	-0.077579	0.026174	-0.011221	0.090247	0.011113	0.020563	0.013522	0.052477	0.045394	0.050557	0.025762	0.10784	0.22625	0.09463	0.632597
chr2R_18131203_18131443	chr2R_18131203_18131443	2	-0.232464	0.682851	0.109754	-0.087164	-0.136704	-0.008414	-0.029797	-0.043323	-0.087973	-0.022255	0.025745	-0.061601	-0.03528	0.039765	-0.010754	0.019185	-0.027169	-0.011017	-0.027096	0.057655	0.04664	0.030859	0.16964	0.265325	0.485	0.173214	0.101305	0.156068	0.273116	0.365684	0.242179	-0.112063	0.047834	-0.060387	-0.007945	0.082435	-0.009689	-0.024009	0.011238	0.042758	0.020893	0.062289	-0.117019	-0.006686	0.284296	0.153872	0.354949
chr2R_20257202_20257462	chr2R_20257202_20257462	2	0.104681	0.263405	0.044995	0.176755	0.163379	-0.065524	0.047508	0.025335	0.126902	-0.045986	0.039257	0.028212	-0.003928	-0.034047	0.026081	0.03747	0.022555	0.047583	0.040299	-0.003075	-0.106679	0.135184	0.079677	0.158522	0.208297	0.20439	0.171418	0.117555	0.073098	0.219703	0.22441	-0.094116	0.022921	0.134367	-0.043126	0.130396	0.037406	0.026073	0.038457	-0.072055	-0.006218	-0.009306	0.062981	0.057142	0.125514	0.058111	0.039464
chr2R_3906393_3906604	chr2R_3906393_3906604	2	-0.004427	0.379521	-0.0259	0.023407	-0.016118	0.028773	0.05927	-0.021856	0.071977	-0.082322	0.036693	-0.00516	0.014139	0.071324	0.029508	0.061527	-0.01079	0.050571	-0.008091	-0.060946	-0.015924	-0.019704	0.036396	0.201681	0.567549	0.494873	0.360344	0.276827	0.434621	0.402993	0.458122	-0.179895	-0.118484	0.150512	-0.011778	0.041823	0.003567	0.044692	0.104908	-0.065063	-0.005526	0.071881	-0.033883	0.120763	0.245076	0.136355	0.209856
chr2R_7362938_7363262	chr2R_7362938_7363262	2	-0.161142	0.277869	-0.097535	-0.075315	-0.057264	0.086544	-0.040248	-0.074	-0.028089	-0.108486	0.068386	-0.015092	0.052041	0.03192	0.076287	0.086457	-0.005966	0.088506	0.016369	0.097615	0.183128	0.075558	0.140919	0.29726	0.824931	0.69521	0.512521	0.473614	0.704433	0.65529	0.80225	-0.00459	-0.007082	0.043717	-0.087873	0.15029	-0.007801	0.014205	0.08218	0.045257	-0.001384	0.022055	0.06542	0.028017	0.056655	0.016049	0.255377
chr2R_7415518_7416029	chr2R_7415518_7416029	2	-0.328949	0.418774	-0.127203	-0.096218	-0.090908	0.062	0.082598	-0.023971	-0.077959	-0.083168	0.096346	-0.042617	0.128294	0.04491	0.045676	0.196754	0.189792	0.156692	0.048159	0.131385	0.055996	0.117261	0.216608	0.30205	0.845735	0.983796	0.76325	0.534859	0.764361	0.663498	0.778921	-0.022832	-0.023625	0.037867	-0.079063	0.027234	0.006878	-0.006209	0.050211	0.144707	0.034203	0.015778	0.011395	0.045637	0.209052	0.147523	0.046952
chr2R_7416985_7417277	chr2R_7416985_7417277	2	-0.137133	0.406331	-0.079229	-0.108155	-0.085391	-0.043999	-0.040778	-0.039131	-0.057429	-0.087641	0.082829	-0.021723	0.045336	-0.030786	0.03003	0.098244	-0.061267	0.066713	0.033315	0.073944	-0.000545	0.016625	-0.003523	0.299532	0.756817	0.742798	0.661392	0.43646	0.607736	0.63488	0.685226	-0.06912	-0.056827	0.017109	-0.094005	-0.049149	-0.002439	0.013487	0.042335	0.003406	-0.029556	0.020459	-0.045274	-0.016802	0.167095	0.05456	-0.051405
chr2R_8843343_8843628	chr2R_8843343_8843628	2	-0.240309	-0.032335	0.260199	-0.101642	-0.015249	0.043747	0.013769	0.025292	-0.109763	-0.05668	0.094769	0.012425	0.446571	0.491138	0.015838	0.089802	0.134185	0.189781	0.014277	0.16621	0.252146	0.158823	0.118606	0.176829	0.599508	0.356384	0.199992	0.183327	0.238194	0.442492	0.771612	-0.147749	-0.078738	-0.037589	-0.053097	0.090183	0.002169	-0.019795	0.091726	0.03137	0.214167	0.466247	-0.051929	0.004828	-0.021041	-0.125832	0.194957
chr2R_8926279_8926454	chr2R_8926279_8926454	2	-0.147673	0.008979	0.213381	-0.132363	-0.010964	-0.047126	0.044324	0.072992	0.015084	0.019269	0.165315	0.022973	-0.016445	0.001348	0.014654	0.142899	0.05443	0.070741	0.05638	0.175457	-0.004458	0.148745	-0.049764	0.110492	0.574886	0.190812	0.095511	0.12438	0.304763	0.329894	0.432819	-0.13779	0.017669	-0.1721	-0.094546	0.095477	0.017074	-0.065264	0.011337	0.03162	0.002328	-0.005069	-0.057436	-0.012111	-0.057928	-0.187783	0.007726
chr2R_8929682_8929854	chr2R_8929682_8929854	2	-0.11059	0.050381	0.037655	-0.028841	-0.028404	0.057232	0.022117	0.044704	-0.016005	-0.037358	0.130845	-0.015762	0.033422	0.090368	-0.043347	0.066224	-0.054129	0.004323	0.052168	-0.062477	-0.002182	0.171826	0.005285	0.0817	0.357461	0.224503	0.127216	0.218263	0.205606	0.408846	0.488018	-0.007319	-0.020994	0.052642	-0.033548	0.154247	0.022658	0.028832	0.085328	-0.027051	0.046679	0.077628	-0.038351	-0.034066	0.047598	-0.051295	0.830009
chr3L_11003369_11003830	chr3L_11003369_11003830	2	-0.263112	0.433619	-0.026079	-0.126665	-0.098933	-0.019415	-0.069649	0.00176	-0.101831	-0.029468	0.042801	-0.001404	0.004839	0.034548	0.023713	0.050617	-0.009102	0.069065	0.064913	-0.002853	0.061065	0.060877	0.036862	0.306305	0.57987	0.579117	0.349812	0.247371	0.466048	0.442109	0.508596	-0.193278	-0.109185	-0.146768	-0.104246	-0.131471	-0.005778	-0.025813	-0.046855	-0.027146	0.002127	0.020143	-0.103841	0.007958	0.14244	-0.008967	0.358104
chr3L_1178124_1178373	chr3L_1178124_1178373	2	-0.366055	0.007945	-0.018179	-0.088365	-0.00354	-0.085978	-0.033388	0.09945	-0.115858	-0.070171	0.042225	-0.058894	0.079805	-0.017829	0.097321	0.194307	-0.022267	0.092362	0.065228	-0.046939	0.009318	0.155041	0.021974	0.268804	0.628247	0.799748	0.537312	0.395985	0.396816	0.60609	0.671742	-0.136215	-0.093593	-0.03189	0.065666	0.059633	0.012096	-0.033112	0.068618	-0.083475	-0.002276	0.010437	0.01544	0.001792	-0.002814	-0.076944	0.221196
chr3L_12602380_12602746	chr3L_12602380_12602746	2	-0.187763	0.070763	0.083551	0.008497	-0.027233	0.023156	0.07362	0.006698	-0.013461	-0.025017	0.041026	0.034276	0.079263	-0.025503	0.061733	0.102941	-0.008221	0.057741	0.071478	-0.037346	0.036809	0.141502	-0.050761	0.159423	0.709664	0.65109	0.505274	0.35299	0.511525	0.512691	0.867269	-0.021645	0.031707	0.03253	-0.029441	0.093139	0.016637	0.039094	0.123939	0.01225	0.06188	-0.009209	0.062828	0.020476	0.228818	0.268343	0.294956
chr3L_20614769_20615247	chr3L_20614769_20615247	2	-0.218541	0.384471	-0.124804	-0.149646	0.009638	-0.014581	-0.01013	0.02868	-0.063834	-0.14598	0.036621	-0.059809	0.042453	0.036115	0.050642	0.166521	-0.024631	0.086993	0.045829	-0.03875	0.025724	0.058021	-0.031101	0.252595	0.61785	0.800884	0.540349	0.328051	0.434605	0.520978	0.832383	-0.153385	-0.102881	0.036674	-0.08593	-0.062508	0.011883	0.018929	0.024004	-0.015078	0.011626	0.01437	-0.027822	0.058549	0.229113	0.125294	0.789149
chr3L_21472828_21473010	chr3L_21472828_21473010	2	0.006076	0.345305	-0.052072	-0.035602	-0.108498	0.048592	-0.006328	-0.012125	-0.013394	-0.051386	0.07943	0.010436	-0.005305	-0.024226	0.060491	0.109751	-0.017277	0.041609	-0.017118	-0.066929	0.096518	0.018346	0.049539	0.248094	0.41998	0.391822	0.187695	0.199417	0.264455	0.335518	0.407996	-0.029004	-0.150977	-0.030856	-0.050663	-0.079841	-0.015205	-0.025065	0.01143	-0.011691	-0.029485	0.015135	-0.02812	0.020039	0.036958	-0.098258	0.603752
chr3L_378056_378272	chr3L_378056_378272	2	-0.131159	0.263827	-0.008084	0.017011	-0.024812	-0.049424	-0.009124	0.014889	-0.010896	-0.037831	0.136788	0.015082	-0.018974	0.01993	0.037595	0.095496	0.018604	0.051336	0.053582	0.003347	-0.008671	0.073419	-0.022031	0.172592	0.431998	0.404292	0.219977	0.254674	0.341746	0.370873	0.570932	-0.070099	-0.036486	-0.030329	-0.005296	0.081134	0.012666	0.010409	-0.019647	-0.052991	-0.011257	0.089773	-0.02069	0.047827	0.136858	0.148027	0.070861
chr3L_616425_617275	chr3L_616425_617275	2	-0.349047	0.833963	0.159965	-0.220934	-0.036956	0.083987	0.064265	0.276942	-0.081523	0.111844	0.059611	0.040352	0.078599	0.044643	0.039678	0.213368	0.17367	0.15958	0.164938	0.238705	0.104039	0.184494	0.021055	0.435634	0.737592	0.809437	0.708082	0.392535	0.522453	0.586424	0.655368	-0.212132	-0.072575	-0.028136	-0.163403	-0.104333	0.026512	-0.002414	0.033347	0.142146	-0.012837	0.011388	-0.055382	-0.006112	0.157027	0.147955	-0.087001
chr3L_6897213_6897562	chr3L_6897213_6897562	2	-0.113235	0.033567	-0.034109	-0.008503	0.004861	0.001478	0.067328	0.005726	0.071964	-0.068253	0.091011	0.047978	-0.008848	0.041126	-0.016289	0.05569	0.087176	0.02491	0.053639	0.069663	-0.004909	0.138878	0.117788	0.128729	0.501757	0.438968	0.347008	0.147995	0.272012	0.234069	0.402803	0.068487	0.08981	0.000156	-0.050146	0.123106	0.018956	0.033044	0.046491	0.048388	-0.015491	0.047595	-0.062156	0.059825	0.089334	-0.011983	0.138047
chr3R_12229327_12229756	chr3R_12229327_12229756	2	-0.02718	0.33081	-0.069461	0.006081	0.059546	-0.006675	0.023691	0.011646	0.09453	-0.060562	0.103809	0.000952	0.042233	0.024973	0.00933	0.051517	0.017282	0.038883	0.048364	0.080314	-0.032164	0.0651	0.069757	0.299378	0.797226	0.729272	0.617555	0.455877	0.670337	0.63803	0.773187	-0.00947	0.033788	0.024067	-0.117643	0.153935	0.018083	0.019737	0.118214	-0.017581	0.032766	0.074092	-0.01617	0.028884	0.170537	0.061439	0.344394
chr3R_12528568_12528934	chr3R_12528568_12528934	2	-0.294995	0.089013	-0.078239	-0.05859	-0.037663	-0.027554	-0.012461	-0.0161	-0.139262	-0.088357	0.071038	-0.002888	0.064756	0.053066	0.096597	0.112141	0.024031	0.096187	0.052708	-0.004701	0.09776	0.088053	0.186139	0.150439	0.689553	0.870784	0.761185	0.465448	0.635638	0.621925	0.630333	-0.04631	-0.10371	0.041984	-0.005954	0.147387	0.001122	0.001685	-0.0078	0.055056	0.014116	0.05472	0.040267	0.048545	0.040573	-0.04938	-0.199127
chr3R_12589763_12590069	chr3R_12589763_12590069	2	-0.030165	0.217653	0.011699	0.011341	0.048741	-0.0274	0.014068	0.020673	0.026279	-0.07461	0.091235	-0.022304	0.098438	0.02257	0.02487	0.079765	0.054397	0.071649	0.054327	0.046157	-0.000451	0.18312	0.059143	0.186774	0.571256	0.812268	0.697026	0.329639	0.423301	0.397295	0.503124	0.013883	-0.032612	-0.044997	-0.012301	0.146381	0.008265	-0.009731	0.078632	-0.019725	0.023013	0.071598	0.036812	0.027179	0.047993	-0.030049	-0.450876
chr3R_12695088_12695416	chr3R_12695088_12695416	2	-0.015529	0.136875	-0.112879	-0.073784	-0.04047	-0.047873	-0.085258	-0.01095	-0.126194	-0.081315	0.09697	0.079439	0.394122	0.527814	0.046268	0.086625	0.00234	0.144777	0.123751	0.022609	0.176478	0.047628	0.218628	0.126961	0.759717	0.88661	0.789396	0.460374	0.667479	0.534089	0.617805	-0.148379	0.056493	-0.084447	-0.122039	-0.014133	0.016311	-0.007119	0.004781	0.019569	0.019593	0.095404	0.060209	0.091823	-0.030921	-0.146603	-0.478509
chr3R_12708185_12708515	chr3R_12708185_12708515	2	-0.021386	0.212492	-0.062865	0.008391	-0.016292	-0.069779	0.012683	-0.031568	0.027295	-0.047943	0.05261	0.006424	0.018195	0.139894	-0.001593	0.084111	0.047139	0.172731	0.094731	0.006452	-0.018144	0.044002	0.078946	0.163048	0.726009	0.619165	0.644807	0.347399	0.57046	0.488059	0.601771	-0.063972	-0.011983	-0.016859	-0.049303	0.01492	0.015813	-0.015111	0.008397	0.02238	0.026667	0.066679	0.009874	0.050712	0.164418	0.133154	-0.162102
chr3R_12774315_12774605	chr3R_12774315_12774605	2	-0.44548	0.362129	-0.180408	-0.197774	-0.19586	-0.003087	-0.056191	-0.122227	-0.087002	-0.142829	0.011638	0.008353	0.060806	0.079136	0.082638	0.013397	-0.057385	0.100849	0.099455	-0.078103	0.045866	0.028608	0.054778	0.132936	0.879642	0.777582	0.747413	0.471179	0.763875	0.53445	0.699487	-0.131558	-0.153694	-0.089435	-0.237047	-0.046537	-0.020791	-0.01248	-0.005616	-0.005856	0.002596	0.076512	-0.110128	-0.042006	0.176903	0.139888	-0.132252
chr3R_13947267_13947833	chr3R_13947267_13947833	2	-0.162843	0.084317	-0.123551	-0.093492	-0.094789	0.004617	0.019043	-0.028824	-0.022484	-0.085607	0.067982	0.047651	0.102053	0.150946	0.123143	0.123771	0.099128	0.349249	0.075782	0.04245	0.04138	0.041376	-0.051943	0.232016	0.767654	0.880731	0.724237	0.265479	0.461955	0.657278	0.962688	-0.224835	-0.134291	0.030638	-0.090292	0.037388	-0.000514	0.000504	0.009784	0.021837	0.038717	0.041939	-0.085566	-0.002369	0.110311	0.060952	0.424001
chr3R_17259978_17260243	chr3R_17259978_17260243	2	-0.1764	0.513167	-0.138887	-0.114118	-0.06965	-0.026339	0.036116	-0.028711	-0.079499	-0.102084	-0.01232	-0.02764	-0.017069	0.025807	0.004696	0.026341	0.037447	0.05873	-0.000673	-0.050782	-0.037072	-0.018974	-0.024464	0.228519	0.402065	0.328904	0.222987	0.179243	0.357335	0.373789	0.49074	-0.02837	-0.114251	0.119652	-0.078657	0.018701	0.01116	0.040526	0.061586	-0.031275	-0.021541	0.032398	-0.118957	0.046589	0.138492	0.161206	0.180978
chr3R_17272064_17272441	chr3R_17272064_17272441	2	-0.15938	0.496273	-0.022139	-0.081186	0.01083	0.020416	0.004143	-0.010212	-0.065799	-0.054592	0.064397	0.024975	0.00857	0.02279	0.051376	0.095349	0.011434	0.039249	0.064894	0.087455	0.065035	0.09887	-0.014591	0.2806	0.857175	0.833336	0.697822	0.536221	0.754475	0.662628	0.802154	-0.126676	0.020113	-0.063704	-0.126444	0.044118	0.002487	0.023135	0.052486	0.06553	0.065743	-0.001141	-0.046853	-0.006332	0.12961	0.161929	0.176209
chr3R_25381745_25382064	chr3R_25381745_25382064	2	-0.390919	0.341072	-0.19699	-0.143891	-0.182006	-0.047039	-0.075376	-0.079274	-0.060653	-0.173844	0.128669	-0.036718	0.108996	0.021207	0.014776	0.096988	0.043981	0.14765	0.044268	0.073711	0.066046	0.060099	0.095979	0.204974	0.794968	0.824088	0.629329	0.40816	0.656475	0.536109	0.772255	-0.14442	-0.174293	-0.050331	-0.029803	-0.180945	0.002	0.004202	0.02071	-0.023875	0.025988	0.038536	-0.05416	0.052258	0.132628	0.072667	0.183361
chr3R_25516850_25517175	chr3R_25516850_25517175	2	-0.273	1.04579	0.126672	-0.253973	-0.192163	-0.016753	0.015236	-0.029644	-0.35772	-0.080706	0.071162	-0.098187	-0.038564	-0.056629	-0.048656	-0.034133	-0.064146	-0.007786	0.040996	-0.09214	0.003945	0.00631	0.081084	0.371067	0.662511	0.34842	0.180955	0.332766	0.495972	0.566246	0.559691	-0.146281	-0.203371	0.061928	-0.353014	-0.102392	0.007725	0.014035	0.023122	0.058925	-0.03921	-0.046971	-0.161682	-0.058272	0.285769	0.475533	0.883166
chr3R_2617158_2617556	chr3R_2617158_2617556	2	-0.105756	0.442276	-0.095826	-0.0932	-0.079282	-0.018202	-0.022494	-0.007373	-0.103827	-0.065278	0.03679	0.005006	0.070958	0.022303	0.092165	0.111983	-0.006138	0.064914	0.077012	0.03305	0.050052	0.104612	-0.050024	0.252981	0.840357	0.918716	0.852895	0.557483	0.729815	0.701166	0.629016	-0.070922	0.076925	0.000513	-0.134012	0.078862	0.021004	0.041085	0.141866	0.016591	0.012126	-0.004278	-0.030242	0.014356	0.154519	0.197033	0.179276
chr3R_26738075_26738441	chr3R_26738075_26738441	2	-0.166114	0.57614	0.008211	-0.099728	-0.075566	-0.031945	0.050756	-0.086969	-0.06737	-0.054551	0.06697	-0.001725	0.096225	-0.012525	0.095417	0.147788	0.220334	0.040817	0.045345	0.084492	0.011473	0.054811	0.029495	0.281002	0.730715	0.736944	0.659072	0.450886	0.593983	0.617986	0.623003	-0.110816	0.007957	0.069389	-0.16469	0.224441	0.01211	0.049059	0.160597	0.048031	0.019425	-0.041484	0.045647	0.039452	0.145006	0.104607	0.028475
chr3R_2826353_2826907	chr3R_2826353_2826907	2	-0.052923	0.124928	-0.041718	0.000479	-0.081732	-0.012015	0.022639	-0.015934	0.051262	-0.103218	0.082844	0.054633	0.096945	0.040939	0.076645	0.218866	0.057684	0.10104	0.048105	0.004839	0.128694	0.033595	0.193439	0.203041	0.805517	0.761717	0.750684	0.484157	0.709097	0.578883	0.696751	-0.041441	0.001589	0.091736	0.12345	-0.011732	0.010557	-0.001736	0.011326	-0.014245	0.059671	0.104419	-0.03785	0.122622	0.0922	0.134557	-0.089866
chr3R_2862991_2863312	chr3R_2862991_2863312	2	-0.038116	0.255999	-0.096776	-0.142941	-0.029325	-0.064496	-0.002822	-0.028193	-0.035156	-0.140705	0.018409	0.00844	0.00548	-0.001461	0.057033	0.044608	0.001644	0.038496	0.060121	0.098888	-0.040158	0.107685	0.095646	0.204225	0.658533	0.53255	0.46904	0.260142	0.416509	0.412384	0.420597	-0.030245	-0.095334	0.033945	-0.109376	0.087373	0.009084	0.058857	0.112036	-0.016695	-0.013214	0.072888	-0.079497	0.036073	0.15572	0.113383	-0.13295
chr3R_4016653_4016841	chr3R_4016653_4016841	2	-0.111407	0.242801	-0.140954	-0.149348	-0.07157	-0.034399	-0.1268	-0.063573	-0.023618	-0.134118	0.097779	0.006756	0.081647	0.042457	-0.013222	0.080664	-0.0675	0.070294	0.005356	0.030131	0.073149	0.060838	-0.000725	0.230408	0.781301	0.692371	0.556832	0.515638	0.567485	0.554605	0.700091	-0.13906	-0.151804	-0.117653	-0.081624	-0.129134	-0.002569	-0.008147	-0.003458	-0.018047	0.000922	0.047744	-0.107191	-0.0204	0.071391	-0.004794	-0.050867
chr3R_4159584_4159831	chr3R_4159584_4159831	2	0.013039	0.571516	0.011302	-0.026773	-0.180101	-0.055821	-0.04363	-0.080716	-0.005252	-0.016565	0.038809	0.032364	0.036325	-0.039138	0.204005	0.022574	0.037653	0.146266	0.073283	-0.052281	0.051618	-0.012967	0.110203	0.200868	0.588874	0.471571	0.435792	0.264348	0.385013	0.408056	0.47844	0.037294	-0.056842	0.076673	-0.129216	0.003575	0.009231	-0.005308	0.048197	-0.01195	-0.016094	0.004532	-0.000295	0.022676	0.252846	0.434979	0.03771
chr3R_6361513_6361763	chr3R_6361513_6361763	2	-0.250681	0.135989	-0.22879	-0.089488	-0.055999	-0.015593	-0.09726	-0.031005	-0.143561	-0.176	0.109266	-0.009436	0.011528	-0.023734	0.056802	0.011785	-0.021223	0.046848	0.040751	-0.001229	0.037512	0.034386	-0.006727	0.190198	0.479497	0.502951	0.349881	0.22321	0.36072	0.366179	0.504053	-0.17839	-0.019003	-0.126101	-0.030492	-0.162461	0.010357	-0.054392	-0.044122	0.012822	0.022671	0.019022	-0.032026	-0.001836	0.022447	-0.161064	-0.229904
chr3R_6440055_6440445	chr3R_6440055_6440445	2	-0.236501	0.151823	-0.157176	-0.128977	-0.043501	0.013407	-0.022538	0.062484	-0.065798	-0.094489	0.189394	-0.046596	-0.017089	0.051125	0.016011	0.062666	-0.012407	0.05724	0.051998	0.01089	0.011994	0.124943	0.021786	0.164255	0.608697	0.493639	0.326214	0.290055	0.476059	0.450595	0.665033	-0.046509	-0.057496	-0.00052	-0.143064	0.11968	-0.005046	-0.004089	0.064221	0.076418	-0.035075	0.016978	-0.129056	0.032884	0.157252	0.144278	-0.051747
chr3R_6447964_6448165	chr3R_6447964_6448165	2	-0.098822	0.178585	-0.109677	-0.093298	-0.067205	0.000518	0.014485	-0.009468	-0.073511	-0.066018	0.11362	-0.002512	0.019159	0.010294	0.033794	0.026746	-0.046824	0.098337	0.045295	0.040934	0.051909	0.096667	0.028231	0.132444	0.660025	0.591072	0.543351	0.337468	0.4664	0.440751	0.450913	-0.11412	-0.098032	-0.01408	-0.071333	0.103471	-0.001629	0.021903	0.041042	0.077531	0.007247	0.030754	-0.014033	0.038053	0.091179	0.100218	-0.070094
chr3R_678064_678494	chr3R_678064_678494	2	-0.229099	-0.026821	-0.092336	-0.032176	0.044629	0.052036	-0.032827	0.010792	0.027749	-0.106424	0.167336	0.041017	0.097648	-0.003093	0.035924	0.288349	0.073525	0.149048	0.023764	-0.044468	0.008597	0.100728	0.096982	0.149152	0.799371	0.843419	0.664926	0.301465	0.508482	0.54321	0.992413	0.015815	0.06489	-0.054604	0.001606	0.091175	0.010855	-0.015224	0.045062	0.020021	0.079929	0.004224	-0.00035	0.043852	0.136141	-0.008198	0.148332
chr3R_7178678_7179522	chr3R_7178678_7179522	2	-0.057777	0.063035	0.004982	0.013121	0.070429	0.218832	0.261038	0.217028	0.067671	0.05161	0.146325	0.030521	0.040625	0.027699	0.05966	0.155052	0.162215	0.220028	0.096865	0.116311	0.154567	0.148446	0.101524	0.223594	0.835028	0.652946	0.572049	0.43163	0.722831	0.665569	0.953296	0.035304	0.082958	-0.06729	-0.005861	0.223509	0.009582	0.00196	0.082468	0.056625	0.091424	0.068375	0.056801	0.056667	0.288457	0.200653	0.678011
chr3R_8070223_8070410	chr3R_8070223_8070410	2	-0.096835	0.135772	0.048201	0.002004	0.028423	0.010792	-0.057757	0.00121	-0.06177	-0.027131	0.052049	-0.001183	0.005909	0.017964	0.043288	-0.001513	-0.012392	0.068423	0.002642	0.018321	0.045633	0.09086	0.01351	0.172305	0.391509	0.251143	0.116029	0.105825	0.273591	0.320467	0.448861	-0.11114	-0.039097	-0.10402	-0.005629	-0.000507	0.007557	0.007532	0.058887	0.035557	0.03119	-0.007225	-0.066499	-0.027249	-0.068485	-0.103886	0.304105
chr3R_8104746_8104979	chr3R_8104746_8104979	2	-0.199578	0.252479	-0.103892	-0.182328	-0.009357	-0.027722	0.053263	-0.032195	-0.118354	-0.087444	0.031121	-0.051334	0.0003	0.001246	0.038582	0.02088	-0.033738	0.046529	0.045068	0.040822	0.031319	0.064745	0.034465	0.237326	0.588203	0.337511	0.202881	0.211216	0.406387	0.463015	0.515857	-0.069057	-0.161019	-0.042787	-0.162878	0.025265	0.00362	0.041882	0.049817	0.052764	0.066313	-0.00656	-0.130809	-0.022118	0.022992	-0.103616	0.808505
chr3R_8106495_8106874	chr3R_8106495_8106874	2	-0.373851	0.195691	-0.112057	-0.086803	-0.129314	-0.010757	0.010322	0.012242	-0.045366	-0.093837	0.037171	-0.045163	-0.040941	0.020495	0.001385	0.027273	0.031161	0.224896	0.092666	0.011106	0.023896	0.180527	-0.011862	0.22519	0.729563	0.488948	0.302163	0.272605	0.463811	0.452487	0.763901	-0.171445	-0.131855	-0.054874	-0.15652	-0.094131	0.013326	-0.034059	-0.012965	-0.025864	-0.014891	0.02343	-0.054552	-0.030479	0.131656	0.124877	0.134273
chr3R_8889753_8890240	chr3R_8889753_8890240	2	-0.241251	0.295938	-0.039272	-0.113717	-0.123665	0.07375	-0.041578	-0.027979	-0.030621	-0.106727	0.051753	0.043086	0.059117	0.045768	0.042098	0.134218	0.018152	0.067895	0.066377	0.069885	0.128953	0.051552	0.068639	0.250692	0.735962	0.794182	0.697565	0.328601	0.605356	0.499816	0.757227	-0.104578	-0.00594	-0.059894	0.024481	-0.023811	0.002711	-0.008178	0.040139	0.0277	0.055861	0.077516	-0.008731	0.0786	0.089914	0.067998	0.025194
chr3R_912407_913189	chr3R_912407_913189	2	-0.187947	0.647774	0.020896	-0.092694	0.015806	0.054933	0.039436	0.03387	-0.074182	-0.061729	0.046321	0.032055	0.098248	0.204328	0.224476	0.107321	0.096088	0.084246	0.104445	0.12317	0.131587	0.04764	0.084688	0.407747	0.645458	0.742074	0.708525	0.314789	0.588776	0.378878	0.428519	-0.17728	-0.12332	0.077839	-0.071688	-0.01301	0.030662	0.024499	0.07039	0.100199	0.103444	0.501528	-0.075659	-0.010285	0.235782	0.235098	0.933635
chr3R_9700799_9701109	chr3R_9700799_9701109	2	-0.312879	0.192857	-0.030842	-0.10746	-0.034351	0.005978	0.029468	0.004695	-0.037618	-0.059568	0.133381	-0.012094	0.101185	-0.014691	0.085569	0.207379	0.067797	0.084105	0.080615	0.056385	0.079043	0.126933	0.124427	0.162859	0.787969	0.726248	0.509053	0.441544	0.603835	0.494889	0.785133	-0.089669	0.043487	-0.001257	-0.041577	0.197011	0.014928	0.034639	0.099003	0.061626	0.069655	0.005547	0.029382	-0.007336	0.213486	0.183745	0.341495
chr3R_9702933_9703231	chr3R_9702933_9703231	2	-0.110536	0.062286	-0.099794	-0.020481	-0.021302	-0.027171	-0.026667	0.003163	-0.016801	-0.070784	0.008965	-0.03347	0.031168	-0.016316	0.03367	0.079606	-0.043944	0.065107	0.030882	0.022944	0.011146	0.048019	0.001859	0.190742	0.510443	0.341331	0.208161	0.273587	0.345897	0.518956	0.613356	-0.14701	0.120661	-0.086122	0.005773	0.152291	0.009779	0.016991	0.094503	0.013844	0.045089	-0.002411	0.010151	0.008615	-0.090164	-0.004409	0.546847
chr3R_9727303_9727466	chr3R_9727303_9727466	2	-0.198512	0.378537	-0.033228	-0.14223	-0.159084	-0.038661	0.010077	-0.062588	-0.070025	-0.070323	0.045874	0.00934	0.037945	-0.040865	0.036413	0.051317	-0.068882	0.060751	-0.022604	-0.04811	0.023036	-0.029748	-0.085133	0.311667	0.73166	0.638283	0.51825	0.40496	0.503338	0.600444	0.607703	-0.107556	-0.129113	0.037767	-0.165077	0.003328	0.002958	-0.000427	0.041169	-0.010054	-0.035957	0.01743	0.002813	-0.047693	0.249292	0.148262	0.42197
chrX_16041605_16042250	chrX_16041605_16042250	2	-0.27509	0.312383	-0.024296	-0.144156	-0.128538	0.001148	0.11056	0.027335	0.022158	-0.114121	0.067172	0.033312	0.070762	0.054594	0.110655	0.097005	0.042519	0.121099	0.114133	0.101033	0.043633	0.011644	0.055142	0.226511	0.839676	0.584938	0.517181	0.397881	0.775647	0.560234	0.851449	-0.07684	-0.039301	0.08022	-0.022224	0.00897	0.020183	-0.000872	0.030432	-0.009337	0.002681	0.066803	-0.03593	0.072746	0.394149	0.394323	0.224542
chrX_16043114_16043429	chrX_16043114_16043429	2	-0.099885	0.131046	-0.114689	-0.040634	0.038626	0.034116	0.005982	-0.056188	0.004016	-0.065198	0.040129	0.042855	-0.049562	0.016342	0.133411	0.064495	-0.044251	-0.004982	0.054389	0.038858	0.043673	0.159082	0.058298	0.138514	0.330139	0.234561	0.080194	0.205705	0.334536	0.302984	0.445207	-0.065325	-0.027383	-0.057701	-0.038888	0.060994	0.008625	-0.020442	0.034468	0.037598	0.014349	0.085522	-0.051675	-0.063584	0.041852	-0.046079	0.304175
chrX_16110763_16111870	chrX_16110763_16111870	2	0.012215	0.148697	0.058067	0.075579	-0.076723	0.032971	0.036715	-0.02715	0.147804	-0.019894	0.070626	0.076459	0.03028	0.066428	0.041355	0.271008	0.081097	0.109774	0.101094	0.064619	0.063058	0.139767	0.069366	0.237246	0.884548	0.847827	0.740662	0.433983	0.7419	0.575734	0.890966	-0.009627	0.019828	0.01503	0.087897	0.128088	0.012894	0.0114	0.097145	-0.004449	0.00542	0.188757	-0.007217	0.166723	0.197274	0.13121	0.147679
chrX_17662236_17662539	chrX_17662236_17662539	2	-0.287807	0.221204	-0.073273	-0.095092	0.003422	0.00915	0.048645	-0.027912	0.037006	-0.089278	0.166919	0.052406	0.082259	0.055801	0.054889	0.177719	0.141728	0.194919	0.081135	0.007668	0.053534	0.006961	0.014783	0.110088	0.664404	0.741261	0.610528	0.422234	0.578719	0.502901	0.678324	-0.001422	-0.129929	0.042443	-0.05478	-0.003867	-0.002312	0.030804	0.015564	0.000211	0.060757	0.112409	-0.061302	0.109698	0.216869	0.150181	-0.02604
chrX_18206609_18206872	chrX_18206609_18206872	2	-0.069365	0.262978	-0.019108	0.017353	0.11168	-0.018577	0.049169	0.034956	0.06282	-0.035595	0.059377	-0.0324	-0.041436	0.032593	0.091032	0.082079	0.016512	0.079603	0.035092	0.039887	-0.001167	0.073635	-0.046511	0.225798	0.411647	0.309663	0.220687	0.110549	0.236374	0.272946	0.584499	-0.067444	0.033061	0.050337	-0.01766	0.231594	0.024996	0.045711	0.079407	0.005245	0.04156	0.045257	-0.027316	0.079082	0.216897	0.175494	0.224187
chrX_4305447_4305778	chrX_4305447_4305778	2	-0.181502	0.067153	-0.074192	-0.045724	-0.000767	0.019066	-0.022215	-0.025199	-0.085621	-0.093879	0.036389	0.036131	0.054061	-0.020891	0.003105	0.087853	-0.012326	0.077809	0.021896	0.081821	0.0809	0.074584	0.099454	0.133241	0.627573	0.775556	0.616036	0.305523	0.460811	0.485791	0.576259	-0.044806	-0.078676	-0.112446	-0.038946	0.050274	5e-06	-0.013617	0.031382	0.013127	0.015014	0.009203	-0.028346	0.001796	-0.040143	-0.066076	-0.152862
chrX_4319034_4319427	chrX_4319034_4319427	2	-0.215022	0.209814	-0.053393	-0.062456	-0.007471	-0.03172	-0.085931	0.007367	-0.014249	-0.058633	0.065172	0.040014	0.041717	-0.031445	0.106128	0.188631	0.020383	0.098953	0.088068	0.063619	0.12472	0.125983	0.010188	0.122974	0.813642	0.852168	0.743104	0.463558	0.652995	0.597169	0.810895	-0.075754	-0.064324	-0.131914	0.060575	0.099239	-0.007491	-0.031546	0.007274	-0.020239	0.04538	0.054697	-0.02758	0.047833	0.087145	0.119505	-0.036247
chrX_4320759_4321231	chrX_4320759_4321231	2	-0.319439	0.222938	-0.056509	-0.139162	-0.067006	0.01776	0.020439	0.037975	0.036311	-0.111534	0.074675	-0.000253	0.009805	-0.008388	0.108673	0.092667	0.059699	0.127162	0.052286	0.001468	0.074064	0.052826	0.02032	0.231037	0.850389	0.57037	0.503312	0.328203	0.687748	0.446406	0.744456	-0.147879	-0.217593	0.045469	-0.050204	0.079969	0.003716	0.006208	0.042989	-0.058299	0.01506	0.081729	-0.067731	0.116706	0.248626	0.295004	0.165684
chrX_5454556_5454976	chrX_5454556_5454976	2	-0.030023	0.12127	0.002303	0.047509	0.036988	-0.011343	-0.019721	-0.020798	0.076719	-0.056574	0.052903	0.060848	0.034454	0.015325	0.00981	0.029587	0.040363	0.116681	0.008451	-0.028756	-0.006682	0.038069	0.012814	0.09937	0.62346	0.650181	0.584307	0.301791	0.446972	0.43364	0.519848	-0.014454	-0.018788	-0.0019	0.01231	0.137131	0.017234	0.007429	0.042282	-0.037494	0.010342	0.016418	0.134927	0.035047	0.084741	0.079378	-0.111742
chrX_5455768_5456097	chrX_5455768_5456097	2	0.061247	0.197505	0.022461	-0.036386	-0.024534	-0.085687	-0.010403	0.019634	0.035372	-0.025475	0.003971	0.052507	0.013266	0.003843	-0.051007	0.046637	-0.000732	0.005292	0.025968	0.037592	-0.012851	0.060103	-0.052383	0.167386	0.29486	0.090676	0.054617	0.135533	0.185554	0.514549	0.079405	0.019542	-0.013503	-0.036319	0.095452	0.047647	0.006746	0.066572	0.047328	-0.036043	-0.015182	-0.009903	-0.011499	-0.015259	0.009704	0.116888	0.009451
chrX_5487836_5488319	chrX_5487836_5488319	2	-0.066943	0.35871	-0.07478	0.033953	-0.056472	0.020853	-0.016429	-0.021953	-0.007677	-0.109154	0.047294	0.001666	-0.030128	0.00866	0.096748	0.081267	-0.000647	0.010268	0.039428	0.015752	0.024342	0.109933	0.049987	0.167806	0.715722	0.605205	0.419867	0.281208	0.435072	0.48858	0.599457	-0.132584	-0.084356	0.024605	-0.069641	0.035469	0.019308	-0.006215	0.036518	-0.000249	0.018211	-0.024401	-0.044968	0.097148	0.145032	0.170349	0.568806
chrX_5894835_5895003	chrX_5894835_5895003	2	-0.038912	0.364422	-0.026438	-0.082211	-0.064351	-0.032676	-0.029416	-0.021595	0.004467	-0.042699	0.027012	-0.010865	0.015498	0.02675	0.168883	-0.022622	-0.058413	0.055495	0.01419	-0.125006	-0.054551	-0.069238	-0.040013	0.165295	0.264883	0.029236	0.064343	0.146434	0.183989	0.303184	0.080338	-0.069452	0.047763	0.056939	-0.005722	-0.043514	-0.011871	0.025831	0.026407	-0.050256	0.001637	0.110996	-0.064419	0.018833	0.119662	0.240954	0.486445
chrX_5895253_5895735	chrX_5895253_5895735	2	0.118093	0.408981	0.006662	0.028502	0.052435	0.098689	0.051157	0.018739	0.059728	-0.030924	0.037062	0.057791	-0.01792	0.005922	0.104882	0.02056	-0.022673	0.012241	0.073645	0.104475	0.031526	0.108894	0.178873	0.220293	0.429361	0.286271	0.177084	0.214326	0.334049	0.399551	0.435256	-0.056129	0.084574	0.042431	-0.104693	0.100418	0.013475	0.03239	0.030993	0.011308	0.051442	0.017687	-0.045163	0.030924	0.136235	0.150736	0.256996
chrX_5907044_5907755	chrX_5907044_5907755	2	-0.100609	0.113072	-0.045988	-0.028231	0.00727	0.019635	0.036914	0.004221	0.019704	-0.084848	0.039278	0.027912	0.100998	0.03944	0.018285	0.098348	-0.012306	0.067399	0.046293	0.010674	0.027848	0.142327	0.091355	0.230669	0.537829	0.404456	0.277957	0.205009	0.341181	0.410681	0.300819	-0.008021	-0.010129	0.040917	0.04053	0.123444	0.019597	0.041434	0.065457	0.055729	0.053094	0.158669	0.047176	0.055158	0.05766	-0.022037	1.51237
chrX_8518912_8519171	chrX_8518912_8519171	2	-0.125849	0.034166	-0.013365	0.040164	0.081645	0.006831	0.005346	-0.024723	-0.012202	-0.022349	0.052156	0.073186	0.095406	-0.023773	0.02242	0.028372	-0.037346	0.152476	0.008799	0.018553	0.050847	0.082881	-0.012421	0.105276	0.490059	0.421347	0.283914	0.143267	0.258841	0.333924	0.268417	0.072447	0.063732	-0.024256	-0.021448	0.029822	0.008466	0.00985	0.03051	-0.021131	-0.043767	-0.002907	-0.093128	0.032649	0.015239	-0.043617	-0.074439
chrX_8651876_8652067	chrX_8651876_8652067	2	-0.134485	-0.054983	-0.017564	-0.089441	-0.033143	-0.020593	-0.000875	-0.025244	-0.033631	-0.077697	0.050077	-0.020184	0.02469	-0.018354	0.103366	-0.026359	-0.102656	-0.012108	0.075604	0.013347	0.020078	0.043939	-0.075024	0.060446	0.253217	0.213649	0.164151	0.127025	0.191437	0.204276	0.029912	0.005106	0.01562	-0.152175	-0.035108	0.023063	0.011176	-0.035502	0.025923	-0.020907	-0.023808	-0.027667	0.067806	-0.009087	-0.025691	-0.138007	-0.050061
chrX_9587768_9588207	chrX_9587768_9588207	2	0.062447	0.079561	-0.033427	-0.011561	-0.040536	-0.073457	-0.03395	-0.02038	0.054896	-0.039626	0.053604	0.058193	0.013064	0.038384	0.079145	0.144941	-6.7e-05	0.032072	0.054692	-0.026852	0.031837	0.104156	0.033672	0.166624	0.61883	0.462506	0.327835	0.230831	0.400707	0.336126	0.583504	-0.030614	-0.082427	-0.004179	0.042206	-0.001132	0.016689	-0.047307	0.053032	-0.027827	0.036414	0.077349	0.035205	0.10295	0.117976	0.250692	0.075939
chr2L_107751_108310	chr2L_107751_108310	3	-0.239649	-0.229783	-0.07013	0.134476	0.174354	0.398424	0.487463	0.243647	0.202471	0.06812	0.165793	0.596662	0.280123	0.196558	0.14394	0.105388	0.196253	0.126408	0.121315	0.15391	0.192429	0.22677	0.099577	0.095034	0.08426	0.208988	0.100152	0.071011	-0.013118	-0.006991	-0.064574	0.263111	0.010412	-0.052742	0.122112	0.114817	0.002351	-0.024045	0.08497	0.036988	0.009691	-0.006897	0.067024	0.028796	0.077072	-0.167802	1.55235
chr2L_11053390_11053719	chr2L_11053390_11053719	3	-0.164038	-0.02538	0.064951	0.031651	-0.026199	0.013821	0.116028	0.094901	0.044289	0.052601	0.130774	0.057243	0.039073	0.015948	0.271978	0.036521	0.090953	0.142961	0.214843	0.166874	-0.045014	0.028624	-0.117589	0.261983	0.186041	0.265541	0.237972	0.05166	0.092575	0.071089	0.08273	-0.100785	-0.081993	-0.003024	-0.062442	-0.034651	0.021058	-0.011196	0.007028	-0.050333	-0.010076	0.046635	0.003807	-0.009602	0.245013	0.11508	-0.090065
chr2L_11155563_11156071	chr2L_11155563_11156071	3	-0.159104	-0.138716	0.022791	-0.081817	-0.136999	0.080745	0.019463	0.029896	-0.048188	-0.054585	0.057446	0.00424	-0.018183	-0.015958	0.09992	0.034115	0.037365	0.071863	0.118563	0.131929	0.062367	0.063469	0.018823	0.250086	0.189522	0.081173	0.074587	-0.015013	0.091882	0.010382	0.048442	-0.05802	-0.179989	-0.117858	-0.062356	-0.158652	0.016301	-0.017402	-0.100023	0.055929	-0.002124	-0.031468	-0.073651	0.002112	0.10776	0.024363	0.247632
chr2L_11528174_11528318	chr2L_11528174_11528318	3	-0.307084	-0.24684	0.003079	-0.024785	0.014651	-0.005737	0.123809	0.09715	-0.043229	-0.005288	0.235621	0.113475	0.062194	-0.020099	0.357547	0.071158	0.011622	0.188164	0.156791	0.120807	0.026234	0.044064	0.015269	0.05523	0.122763	0.137499	0.089735	0.042086	0.018789	0.049988	0.009942	-0.014734	0.039194	-0.172099	-0.194923	-0.043112	-0.012788	-0.076996	0.020375	-0.05469	-0.065793	-0.021517	-0.043075	0.017657	-0.135781	-0.289706	0.443338
chr2L_11808775_11809123	chr2L_11808775_11809123	3	-0.262923	-0.090746	-0.127387	0.168241	0.278865	0.115734	0.307856	0.246388	0.094873	0.014086	0.478936	0.331557	0.154695	0.110067	0.173813	0.07521	0.153466	0.114426	0.089264	0.069279	0.082523	0.2139	0.054039	0.083413	0.042945	0.211725	0.089775	0.106623	0.027596	0.018506	-0.005239	0.037034	-0.095345	0.007217	0.106219	0.18149	0.006131	0.009512	0.098371	-0.049342	-0.007366	0.054184	0.090783	0.081761	0.081023	0.123062	1.56028
chr2L_1185830_1186446	chr2L_1185830_1186446	3	0.09063	-0.017076	0.12588	0.047055	-0.035295	0.015987	0.178491	0.264126	0.2351	0.12148	0.064651	0.139715	0.193563	0.173212	0.033407	0.057793	0.154764	0.116953	0.078448	0.098209	0.032927	0.030918	-0.064934	0.408176	-0.020818	0.096037	0.05029	0.047424	0.096234	0.024344	0.050594	0.242206	0.041246	0.111546	0.066715	0.150193	0.037931	0.025334	0.092261	-0.007129	0.0546	0.06078	0.119168	0.049385	0.262252	0.254407	0.760141
chr2L_12003132_12004078	chr2L_12003132_12004078	3	-0.196649	0.082132	-0.085762	0.031033	0.077082	0.027571	0.08411	0.115339	0.113218	-0.034388	0.152837	0.203513	0.41026	0.560875	0.514366	0.126672	0.130168	0.182975	0.258584	0.201949	0.32366	0.151748	0.098291	0.171287	0.38709	0.33728	0.309104	0.082147	0.24875	0.154772	0.203023	0.102855	-0.022916	0.065406	0.018979	0.011737	0.012858	-0.01871	0.060616	0.028702	0.067834	0.079717	0.127351	0.114511	0.163225	0.129105	-0.331586
chr2L_12006913_12007133	chr2L_12006913_12007133	3	-0.143445	-0.232439	-0.194399	-0.046545	-0.03864	-0.055368	-0.003206	0.02181	-0.04129	-0.067239	0.290036	0.079791	0.142022	0.137762	0.669697	0.082621	0.191129	0.196254	0.189899	0.142161	0.149363	0.241865	0.013139	0.093588	0.306802	0.418093	0.355764	0.087043	0.18995	0.086557	0.199738	-0.209777	-0.069735	-0.202266	-0.083731	-0.091441	-0.004692	-0.078559	-0.036838	-0.03182	0.029126	0.011604	0.097585	0.097621	0.013174	-0.04118	-0.119553
chr2L_12404438_12404834	chr2L_12404438_12404834	3	0.138757	-0.118249	0.043293	0.003876	0.146996	0.115377	0.213703	0.134033	0.194479	-0.009357	0.151272	0.183674	0.077926	0.071938	-0.043569	0.021961	0.09815	0.099698	0.045402	0.139058	-0.011908	0.180191	0.235504	0.027886	0.104232	0.184137	0.046747	0.068283	0.085278	-0.006081	-0.034977	0.022443	0.117601	-0.118947	-0.073675	0.21446	0.00715	-0.031542	0.036978	0.052012	0.036893	0.077566	0.018186	0.056367	-0.177536	-0.266372	0.264069
chr2L_12507603_12507967	chr2L_12507603_12507967	3	-0.088162	-0.264817	0.592638	0.06226	0.145389	0.013884	-0.108458	0.07042	0.002602	0.137697	0.008533	0.246896	0.039057	0.059108	-0.010709	0.095049	0.075653	-0.013139	0.077396	0.059954	0.057398	0.191093	0.108317	0.394274	0.045795	0.144461	0.056333	0.006239	-0.014664	-0.019577	-0.045671	-0.113618	-0.07165	0.004584	0.064648	-0.138427	0.025856	-0.042014	-0.026716	0.03454	-0.026821	-0.003454	0.060143	-2.7e-05	0.049155	0.024597	0.298477
chr2L_12543079_12543566	chr2L_12543079_12543566	3	-0.334366	-0.139368	0.542698	0.237217	0.330632	0.17954	0.071912	0.179422	0.032415	0.159866	0.092296	-0.012306	0.022852	0.041172	0.053857	0.242101	0.172018	0.049872	0.107182	0.05572	0.122451	0.111332	0.04749	0.406339	0.15538	0.142167	0.108678	0.020497	0.129152	-0.007091	0.010874	-0.114177	-0.157169	0.043432	0.082986	0.03011	0.001654	0.026301	0.05344	0.019206	0.005678	0.036763	-0.063632	-0.02638	0.210688	0.105841	0.378031
chr2L_12545761_12546235	chr2L_12545761_12546235	3	-0.42139	-0.212401	0.171741	0.248305	0.25176	0.234143	0.366617	0.292507	0.085499	0.059348	0.210098	0.307491	0.203145	0.180434	-0.060953	0.170585	0.108542	0.049601	0.101275	0.090023	0.043535	0.103931	0.100462	-0.093804	0.108659	0.153319	0.086876	-0.009732	-0.020317	0.015685	-0.025829	0.102233	-0.141187	-0.249446	-0.045533	-0.165885	-0.00413	-0.10447	-0.090114	0.003351	0.029906	-0.006375	-0.100184	-0.027517	-0.045957	-0.294062	1.94285
chr2L_12822570_12822952	chr2L_12822570_12822952	3	-0.273591	-0.185603	-0.050969	0.292321	0.070217	0.159729	0.314421	0.206388	0.063274	0.047841	0.041774	0.06367	0.153492	0.068864	0.076763	0.112161	0.171122	0.187207	0.186014	0.19732	0.095801	0.165356	0.220419	0.00998	0.190871	0.232951	0.165651	0.151999	0.157118	0.058923	0.025068	-0.065057	-0.114579	-0.027604	-0.01374	-0.147189	-0.003985	-0.012832	-0.011285	-0.006772	0.049402	0.074157	0.084349	0.077633	0.230052	0.039781	0.935813
chr2L_129046_129530	chr2L_129046_129530	3	0.048249	-0.083208	0.195617	0.138457	0.036771	0.282179	0.39004	0.192451	0.115633	0.11604	0.065407	0.068132	0.17521	0.066853	-0.00095	0.082156	0.115861	0.079428	0.12048	0.145732	0.112056	0.135945	0.130101	0.131174	0.086514	0.065755	0.046256	0.063424	0.049909	0.049296	0.003795	0.009858	0.073882	0.016601	-0.006965	0.11079	0.015619	-0.001555	0.031717	0.035437	0.019775	0.058054	0.077711	0.066873	0.065306	-0.098221	1.33177
chr2L_12974954_12975190	chr2L_12974954_12975190	3	-0.150682	-0.130403	-0.026583	0.118596	0.272938	0.098737	0.233233	0.192099	0.12307	0.007264	0.090426	0.227992	0.048912	0.087645	0.03549	0.032197	0.042586	0.074088	0.041103	-0.025581	0.014492	0.138726	0.10214	0.035502	0.088101	0.07525	0.086137	-0.025222	0.016003	-0.015175	-0.034225	0.108754	0.03514	-0.068601	-0.086072	0.150843	0.021068	-0.02709	0.070998	-0.014392	0.005117	0.048319	-0.006918	-0.010984	0.016628	-0.034916	1.7874
chr2L_131740_132191	chr2L_131740_132191	3	-0.195092	-0.071962	0.270727	-0.088191	0.049199	-0.070038	0.054071	0.00623	-0.006091	0.037937	0.049352	0.075999	0.243084	0.27491	0.025123	0.098271	0.080267	0.078125	0.13892	0.009364	0.031461	0.047926	-0.017959	0.301612	0.171518	0.170241	0.113446	0.055427	0.031627	0.027495	-0.02159	-0.018598	-0.087856	0.093444	0.080133	-0.044849	0.036744	0.002643	0.015301	-0.030598	0.241806	0.337655	-0.004308	0.072171	0.212819	0.14724	0.65094
chr2L_13215753_13215920	chr2L_13215753_13215920	3	-0.025458	-0.193271	0.000529	-0.124445	-0.003658	0.01416	-0.009805	0.003638	-0.032048	-0.029248	0.043344	0.057618	0.253029	0.352767	-0.010082	-0.045898	0.091563	0.10614	0.045902	0.15775	0.088094	0.031198	0.0273	0.034451	0.057146	0.022342	-0.006799	-0.01547	0.043734	-0.020556	-0.062605	-0.055035	-0.0803	0.014282	-0.034979	0.038429	0.019092	-0.010776	0.002273	-0.005911	0.155265	0.471108	0.064133	0.073114	0.045012	-0.107876	-0.905062
chr2L_13513240_13513711	chr2L_13513240_13513711	3	-0.231063	-0.110933	-0.019211	0.149787	0.097472	0.033997	0.140708	0.190562	0.113089	0.116183	0.130395	0.049154	0.13685	0.060346	0.300533	0.007026	0.237546	0.149701	0.158523	-0.023555	0.000279	0.138249	0.159496	0.145451	0.152152	0.170893	0.06807	0.104116	0.139442	0.064963	-0.038466	-0.097551	-0.074176	0.038169	-0.024417	0.077838	0.009595	0.014514	0.071066	0.004175	-0.010098	0.070216	0.024961	0.136084	0.413924	0.46345	0.872138
chr2L_13513999_13515018	chr2L_13513999_13515018	3	-0.269682	-0.112261	0.00269	-0.12222	-0.061463	0.197722	0.069155	0.198592	0.093066	0.06444	0.123928	0.158595	0.072597	0.028844	0.516156	0.134169	0.108946	0.277529	0.181602	0.225609	0.233496	0.264808	0.187262	0.25469	0.239013	0.163021	0.183255	0.086937	0.130562	0.056277	0.037385	-0.103041	0.016936	0.042105	-0.107524	0.03121	0.008106	-0.003562	0.053949	0.092314	0.038896	0.071911	0.063134	0.127467	0.203177	0.169592	0.513274
chr2L_13571880_13572176	chr2L_13571880_13572176	3	-0.116253	-0.089508	0.006999	0.001501	0.034725	0.13612	0.082908	0.227606	0.156709	0.129432	0.128726	0.080063	0.028909	0.006399	0.122432	0.098383	0.093345	0.173732	0.093922	0.193128	0.128292	0.1961	0.068476	0.20672	0.128073	0.110371	0.131098	0.058719	0.161021	0.090698	0.022708	-0.13036	0.018541	-0.056495	-0.119464	-0.105429	0.020216	-0.054524	-0.06205	0.06518	-0.027723	0.001308	-0.031099	-0.008824	-0.039356	-0.231214	-0.376881
chr2L_1420378_1420539	chr2L_1420378_1420539	3	-0.490691	0.092859	-0.009528	-0.093951	-0.169258	-0.011562	0.00331	-0.01004	-0.020266	-0.053284	0.1054	-0.024826	0.025898	-0.021528	0.034792	0.038781	-0.0217	0.017022	0.101839	-0.038706	0.014366	-0.000514	0.061074	0.059904	0.041826	0.127718	0.059064	0.105519	0.08212	0.070681	0.032607	-0.085796	0.019444	-0.055006	-0.012341	-0.114474	0.003406	-0.03903	0.006105	-0.080145	0.088157	0.021371	0.002474	0.022176	0.13272	0.103761	0.204301
chr2L_1426378_1427312	chr2L_1426378_1427312	3	-0.037676	-0.018058	0.194919	-0.10652	-0.014071	0.233956	0.200693	0.322996	0.135721	0.213765	0.079826	0.019051	0.049209	-0.036701	0.431964	0.098263	0.058237	0.148769	0.152395	0.190282	0.206575	0.155514	0.282653	0.46552	0.084238	0.173117	0.142852	0.056084	0.058955	0.050073	0.013973	-0.111204	-0.012152	0.141045	0.072299	-0.017396	0.030763	0.098776	-0.005332	0.094002	-0.015724	-0.029322	-0.012017	0.059682	0.225315	0.134313	0.168577
chr2L_14409440_14409966	chr2L_14409440_14409966	3	-0.097336	0.096475	0.035045	-0.121036	-0.039533	0.057112	-0.003807	0.069685	-0.155282	-0.061407	0.051233	-0.021957	-0.023763	-0.000473	0.056911	0.102176	0.091812	0.071676	0.175533	0.022943	0.069639	0.052499	0.100014	0.291929	0.374857	0.296815	0.246281	0.20515	0.234002	0.384025	0.480555	-0.203515	-0.012236	-0.045631	-0.075189	0.056763	-0.005829	0.0028	0.079289	0.021402	0.022113	0.038678	-0.128833	0.052524	0.1068	-0.06646	-0.014991
chr2L_15056999_15057285	chr2L_15056999_15057285	3	0.032491	-0.239993	0.039871	0.29604	0.419171	0.186129	0.175994	0.182246	0.254575	0.062735	0.166023	0.355991	0.208233	0.156696	0.063402	0.04802	0.344168	0.209729	0.074963	0.139165	0.154333	0.115166	0.101757	0.102817	0.124513	0.223671	0.184216	0.05953	0.044194	-0.019436	-0.039392	0.387206	0.033253	-0.033924	0.036983	0.207553	0.011679	0.002946	0.096848	0.0579	0.047211	0.001493	0.123235	0.078055	0.070372	0.035134	1.21779
chr2L_15264447_15264881	chr2L_15264447_15264881	3	-0.144719	-0.108963	-0.080818	0.097365	-0.097005	0.080842	0.0839	0.155265	0.116651	-0.023341	0.119345	0.06471	0.058252	-0.030693	0.034127	0.057538	0.05552	0.074699	0.134434	0.081515	0.070858	0.098344	0.077867	0.04421	0.13833	0.159442	0.114203	0.079554	0.08021	0.007929	0.083229	-0.018705	0.023655	-0.055221	-0.132982	0.017264	-0.003575	-0.00083	0.009913	-0.003358	0.063507	0.012383	0.138935	0.050035	0.070945	-0.036657	0.66168
chr2L_15911770_15912038	chr2L_15911770_15912038	3	0.044356	-0.066974	0.00546	0.003831	-0.002811	0.085778	0.027416	-0.025457	0.003291	-0.015642	0.039075	0.033278	0.012919	0.038314	0.062078	0.062283	0.020072	0.089686	0.10729	0.141401	0.078349	0.112367	0.103167	0.03093	0.172828	0.090391	0.124287	0.046763	0.034748	0.036388	-0.003876	-0.019884	-0.011227	-0.023702	-0.020908	0.109058	0.016713	0.012525	0.054306	0.019237	0.015151	0.004571	-0.042784	0.030941	0.098307	-0.126456	0.133645
chr2L_16251690_16252033	chr2L_16251690_16252033	3	0.005292	-0.020162	0.07721	0.143018	0.079956	0.080359	0.019644	0.099354	0.047083	0.025959	0.285082	0.216179	0.031849	-0.013156	0.005037	0.061703	-0.000131	0.070739	0.011342	-0.012703	0.06051	0.091011	-0.115576	0.084348	0.062381	0.08462	0.002499	0.023349	0.015913	0.003831	-0.054708	-0.034233	0.140659	-0.113369	0.014914	-0.078867	0.001397	-0.017925	-0.014749	-0.003665	-0.019113	0.015198	0.057147	0.005074	-0.012159	-0.10431	0.818809
chr2L_16268013_16268503	chr2L_16268013_16268503	3	-0.310766	-0.262805	0.28581	-0.035789	0.287724	0.206269	0.307289	0.288731	0.165416	0.143134	0.141768	0.023753	0.00273	0.042164	0.123675	0.117359	0.273908	0.121948	0.200067	0.175432	0.140113	0.129809	0.05003	0.420789	0.107741	0.223416	0.16115	0.025199	-0.010845	-0.007155	-0.017794	-0.096325	-0.122699	-0.026288	-0.013503	-0.11953	0.006974	-0.052071	-0.088526	0.044815	0.001953	-0.038891	0.027014	-0.01686	-0.07206	-0.229852	-0.049957
chr2L_16271414_16271734	chr2L_16271414_16271734	3	-0.341585	-0.134898	0.054503	-0.076696	0.06629	0.162544	0.097694	0.167507	0.091421	0.010961	0.17612	0.160328	0.079377	0.006573	0.074499	0.229506	0.276237	0.26513	0.178224	0.243659	0.153131	0.03399	0.055818	0.172511	0.189552	0.240084	0.215397	0.062548	0.118664	0.012861	0.069712	-0.186219	-0.142424	-0.123638	-0.218656	-0.07518	-0.010761	-0.074542	-0.061677	0.033254	-0.015391	0.064827	0.004813	0.07613	0.048971	-0.13546	-0.407261
chr2L_16284504_16285108	chr2L_16284504_16285108	3	-0.291105	-0.1782	-0.086608	0.065718	0.039694	0.112502	0.159327	0.130315	-0.000447	0.020126	0.14236	0.134492	0.088082	0.175176	0.132225	0.115645	0.166783	0.337356	0.148745	0.242706	0.158592	0.161816	0.15667	0.047853	0.185043	0.289479	0.222009	0.04049	0.149663	-0.002609	0.061607	-0.161133	-0.109186	-0.171543	-0.086835	-0.142249	-0.003921	-0.102677	-0.055056	0.09126	0.006978	0.005752	-0.078518	0.031394	-0.048856	-0.160986	-0.375241
chr2L_16451053_16451273	chr2L_16451053_16451273	3	-0.271711	-0.177212	-0.070977	0.229968	0.233242	0.227921	0.274293	0.22393	0.044004	0.076097	0.026683	0.051275	0.113706	0.020313	-0.022292	0.03615	0.184232	0.237246	0.165727	0.207841	0.235736	0.153128	0.233972	-0.029756	0.140836	0.125096	0.094088	0.023459	0.078914	0.030193	0.111402	-0.079791	0.00552	-0.108975	-0.196983	-0.151738	-0.006178	-0.074262	-0.003062	0.064077	-0.023321	-0.069752	0.145039	0.075141	0.074704	-0.175035	0.299476
chr2L_1649904_1650235	chr2L_1649904_1650235	3	-0.122075	0.244999	0.229499	-0.032014	-0.009153	0.090952	-0.025442	0.041132	-0.04962	-0.000535	0.010914	0.014624	0.053153	0.019084	0.106328	0.15835	-0.045844	0.111186	0.046114	0.089441	0.016487	0.065967	0.20676	0.204916	0.423885	0.523728	0.390151	0.184929	0.299925	0.276054	0.233372	-0.112428	-0.046483	-0.036664	0.037467	-0.074814	0.015917	-0.015636	0.017544	0.019636	-0.017028	0.015126	-0.020581	0.049941	0.064527	0.012442	-0.067282
chr2L_16520198_16520383	chr2L_16520198_16520383	3	-0.40867	-0.2069	-0.028035	-0.081879	0.058269	0.088878	0.073008	0.135074	-0.051349	-0.019999	0.075065	-0.021249	-0.002145	-0.022257	0.01785	0.10169	0.089849	0.133463	0.057177	0.017306	0.022645	0.114038	-0.050905	0.126861	0.091631	0.067688	0.041812	-0.006676	0.046894	-0.042247	-0.0826	-0.201049	-0.096057	-0.217581	-0.152062	-0.094823	0.006302	-0.092515	-0.058071	-0.022552	0.043895	-0.045337	-0.062226	0.052371	-0.026904	-0.24611	-0.188476
chr2L_16520655_16521017	chr2L_16520655_16521017	3	-0.303456	-0.154376	-0.032214	-0.059225	0.155504	0.179858	0.228942	0.212558	0.123977	0.036513	0.078229	0.036001	0.101873	0.001481	0.104002	0.21013	0.200303	0.202384	0.183369	0.22625	0.101223	0.120996	0.198909	0.185503	0.176244	0.230683	0.145443	0.05587	0.186786	0.041447	0.047661	-0.05445	0.006983	-0.066865	-0.256353	0.021777	-0.002961	-0.040259	0.005767	0.03121	0.050972	0.035239	-0.066545	0.090751	0.074621	-0.108369	-0.197406
chr2L_16532884_16533177	chr2L_16532884_16533177	3	-0.262884	-0.14932	0.157117	0.027721	0.194765	0.038285	0.086662	0.106919	-0.011229	0.007509	0.138798	0.028114	0.050887	-0.011676	0.329073	0.242964	0.18513	0.214343	0.121902	0.24261	0.091221	0.182824	0.141655	0.156779	0.482447	0.243856	0.172332	0.063245	0.254451	0.048379	0.07875	-0.151984	-0.143477	-0.195941	-0.233376	-0.112075	-0.002841	-0.069821	-0.023431	0.030226	0.063986	0.050496	0.040273	0.043207	0.008745	-0.202706	0.79418
chr2L_16534124_16534499	chr2L_16534124_16534499	3	-0.08477	-0.126684	0.147968	-0.019826	0.129384	0.018675	0.077675	0.159226	0.075172	0.053693	0.070091	-0.017719	0.034385	-0.033253	0.102468	0.078626	0.020972	0.050045	0.140495	0.099739	-0.001712	0.221071	0.07688	0.295834	0.296144	0.082907	0.084862	0.075005	0.160666	0.065809	0.078395	-0.15949	0.052989	0.055585	-0.109504	0.188072	0.020629	0.020436	0.052288	2.7e-05	0.047353	0.035514	-0.036379	-0.000174	0.280391	0.181941	-0.120533
chr2L_16544838_16544982	chr2L_16544838_16544982	3	0.114535	-0.124823	0.233347	0.02325	0.022701	-0.065144	-0.033725	0.024081	-0.021131	0.018443	0.012321	0.000676	0.0542	0.097895	-0.003899	0.03264	-0.026604	0.031812	0.021214	0.057696	-0.015885	0.09366	-0.081241	0.199476	-0.015877	0.01675	-0.026679	0.034812	0.015981	-0.008051	-0.014714	-0.058032	0.133977	0.005043	0.076176	0.054394	0.01872	0.015299	0.011913	0.021082	-0.042001	0.026249	-0.058605	0.027246	0.062519	0.038538	-0.047316
chr2L_16587843_16588777	chr2L_16587843_16588777	3	-0.13959	-0.363763	0.444761	-0.015085	0.07703	0.087692	0.068382	0.289826	0.115909	0.149321	0.075495	-0.05503	-0.007904	-0.041787	0.187457	0.122971	0.046425	0.097312	0.108501	0.045544	0.095121	0.146041	0.044542	0.408137	0.066522	0.143266	0.156328	0.018144	0.045717	0.00187	0.042664	-0.116086	-0.101274	-0.020876	-0.012251	-0.109108	0.021426	-0.077012	-0.077417	-0.02019	0.066161	0.001526	-0.087186	0.015862	-0.141536	-0.282996	-0.171662
chr2L_16637298_16637683	chr2L_16637298_16637683	3	-0.125625	-0.059649	0.130197	0.003917	0.045166	0.205611	0.123035	0.261318	0.174086	0.115516	0.090567	0.045798	0.08174	-0.026658	0.031096	0.161831	0.163108	0.181041	0.152262	0.151515	0.178145	0.163627	0.254012	0.238549	0.201007	0.119111	0.104006	0.038217	0.167859	0.017196	0.015361	-0.195744	-0.006304	-0.11661	-0.000231	-0.043623	0.018656	-0.040642	-0.023371	0.051756	0.002359	-0.030278	-0.026581	0.00908	-0.059512	-0.169722	0.053311
chr2L_16685187_16685404	chr2L_16685187_16685404	3	0.035234	-0.073863	0.11331	0.206088	0.186572	2e-05	-0.008505	0.031717	0.035961	-0.005144	0.040347	0.016675	-0.010499	0.011832	0.083046	0.018039	-0.018444	0.063928	0.020629	0.062418	0.049424	0.102885	0.121002	0.192096	0.021339	0.019287	0.008663	0.073215	-0.010144	0.027428	0.027035	0.05438	0.11896	-0.006321	0.051743	0.214047	0.038338	0.045778	0.066037	0.058396	-0.01145	0.045624	0.071748	0.066997	0.11856	0.098832	-0.019401
chr2L_1720923_1721131	chr2L_1720923_1721131	3	-0.060827	-0.124365	0.101723	0.052987	0.182399	0.124431	0.26702	0.325061	0.206073	0.182606	0.072807	0.02649	0.061503	0.0499	-0.017141	0.070658	0.063651	0.074119	0.151543	0.201795	0.078009	0.174611	0.063531	0.277586	0.154177	0.264175	0.191918	0.008736	0.053839	-0.011271	-0.033822	-0.133839	0.035908	0.116625	-0.05569	0.050078	0.013339	0.004489	0.05218	0.014218	5e-06	0.01334	0.074264	0.04058	0.101097	-0.033448	0.032083
chr2L_1734346_1734622	chr2L_1734346_1734622	3	0.042448	0.100025	0.160209	-0.017142	-0.062674	-0.053958	0.084427	0.011491	-0.056109	0.022958	-0.049373	0.04783	-0.04221	-0.009823	-0.007527	0.000809	-0.065116	-0.052117	-0.007635	-0.006537	0.00054	-0.003349	-0.156683	0.177494	-0.019005	0.007575	-0.041999	-0.01268	-0.006761	0.023877	-0.01308	0.027339	-0.206314	0.23874	0.059684	-0.054084	0.039779	0.03096	0.025504	-0.02181	-0.017017	-0.04993	0.024437	-0.029204	0.128848	0.098816	0.182026
chr2L_1737330_1737490	chr2L_1737330_1737490	3	-0.068478	-0.039227	0.176805	0.004782	0.028198	-0.007407	0.051507	0.056848	-0.053392	-0.017436	0.026507	0.006143	-0.070128	-0.028167	0.10183	-0.013073	0.016527	0.026269	0.019416	0.007796	-0.015977	0.098657	0.137095	0.123432	0.074156	0.043963	0.035988	0.015009	-0.023471	0.014137	-0.036604	0.029911	-0.035198	-0.036801	0.011365	0.152149	0.006265	0.021673	0.016601	0.015517	0.031934	-0.060772	-0.145319	0.007116	0.037873	0.061196	0.78213
chr2L_17428026_17428321	chr2L_17428026_17428321	3	-0.169581	0.013283	0.047044	0.035234	0.134569	0.21704	0.215661	0.106882	0.118624	0.055024	0.111717	0.08557	0.11869	0.121714	0.068561	0.088675	0.14351	0.183296	0.134289	0.200955	0.094562	0.178938	0.041246	0.114381	0.130742	0.129218	0.118074	0.127878	0.080821	0.048715	0.043333	-0.047077	-0.030813	-0.04978	0.024998	0.125613	0.015565	-0.03597	0.059205	0.036628	0.049205	0.054146	0.067946	0.015879	-0.057709	-0.048373	0.121534
chr2L_17429807_17430019	chr2L_17429807_17430019	3	-0.120284	-0.263114	0.181826	-0.115436	-0.123303	0.08497	-0.009579	0.084415	-0.007036	0.08188	0.027069	-0.016194	0.039617	0.012373	0.157758	0.088439	-0.005257	0.096915	0.055601	0.061694	0.045471	0.162225	-0.016631	0.334275	0.062689	0.104442	0.108999	0.007824	0.032822	0.015296	-0.036002	-0.104272	-0.128343	-0.10191	0.111844	0.117449	0.00979	0.003248	0.06683	0.02833	-0.006001	-0.011127	-0.00882	0.02237	-0.048755	-0.17566	0.035517
chr2L_18121425_18122169	chr2L_18121425_18122169	3	0.191694	0.123773	-0.065136	-0.007875	-0.065041	0.035736	-0.024388	-0.022225	-0.015228	-0.054706	0.053125	0.010409	0.082864	0.107169	0.342569	0.070444	-0.053954	0.056757	0.011146	0.016803	-0.000835	0.094221	0.084519	0.13275	0.043627	0.014173	0.071989	0.008772	0.033425	0.023322	-0.018746	0.135828	-0.044367	0.130464	0.104282	0.049032	0.009703	0.056643	-0.002415	-0.007821	0.037459	-0.019448	-0.053443	-0.018018	0.000731	0.076194	0.096354
chr2L_18565553_18565858	chr2L_18565553_18565858	3	-0.331418	-0.301821	0.336977	0.306761	0.246021	0.313165	0.299145	0.352758	0.181872	0.29189	-0.041653	-0.046858	0.021419	-0.063311	-0.007357	0.101677	0.06745	0.057734	0.150313	0.110151	0.120521	0.072883	0.049367	0.456359	0.085617	0.096781	0.071803	-0.030343	0.025267	-0.044505	-0.054862	-0.274182	-0.170495	0.094508	-0.085438	-0.345658	0.008242	-0.053471	-0.162831	-0.022266	-0.059461	-0.006307	-0.019768	-0.00483	0.105419	-0.229915	-0.147728
chr2L_18795891_18796631	chr2L_18795891_18796631	3	-0.004475	0.320336	0.389665	0.032088	0.000849	0.102262	0.050214	0.046676	0.033104	0.074293	0.069227	-0.003605	0.026782	0.016229	0.018001	0.266985	0.10885	0.060494	0.071089	0.068337	0.088373	0.173825	0.18852	0.311141	0.536312	0.326682	0.240851	0.148876	0.323249	0.435916	0.484592	-0.087482	-0.024044	0.071937	0.049297	0.169743	0.01627	0.026657	0.080139	0.079397	0.030252	0.069804	-0.041987	0.062729	0.168331	0.237464	0.65329
chr2L_19158012_19158393	chr2L_19158012_19158393	3	-0.314024	-0.086636	-0.130146	-0.093472	-0.027975	-0.028684	0.036876	0.031293	-0.024017	-0.026142	0.182848	0.186986	0.0963	0.06229	0.036184	0.065705	0.174615	0.155453	0.139281	0.136989	0.068136	0.111696	0.074621	0.015718	0.118824	0.222464	0.187486	0.075348	0.094552	0.011989	0.033188	-0.146349	0.019554	-0.106181	-0.104854	0.036464	-0.001913	-0.044574	0.05149	0.076804	0.044199	0.058223	-0.01397	0.088745	0.147334	-0.087689	-0.009857
chr2L_19361908_19362218	chr2L_19361908_19362218	3	-0.044172	-0.044517	-0.035495	0.021736	0.049738	0.066848	0.088197	0.099743	0.057916	-0.008235	0.066161	0.116026	0.070777	0.047987	0.120194	0.039121	0.123115	0.102071	0.110939	0.220461	0.062065	0.145131	-0.042586	0.247888	0.182943	0.135271	0.142068	0.089283	0.157361	0.015061	0.082571	-0.029621	-0.018921	0.012632	-0.004607	0.055131	0.020804	-0.003905	0.062649	0.065881	0.10554	0.031293	-0.040634	0.053851	0.063088	-0.042855	0.648957
chr2L_19398400_19398571	chr2L_19398400_19398571	3	-0.380859	-0.144969	-0.016893	0.088898	0.060929	0.087871	0.024328	0.038341	-0.013598	-0.016733	0.051965	0.054232	0.116093	0.015727	0.249365	0.07092	0.056715	0.112328	0.101237	0.048633	0.128918	0.20496	0.042995	0.040954	0.062031	0.129667	0.089525	0.045156	-0.049189	0.00551	-0.009109	0.02838	-0.081217	-0.152718	-0.069355	-0.115964	0.003775	-0.061305	-0.046877	0.022464	0.050846	0.093828	0.026088	0.050955	0.030144	-0.350425	1.0647
chr2L_19398896_19399163	chr2L_19398896_19399163	3	-0.186455	-0.106909	-0.054605	-0.08579	-0.023796	-0.050182	-0.078105	-0.039852	-0.058848	-0.040636	0.11689	0.097412	0.218655	0.24579	0.201684	0.082936	0.087053	0.175233	0.074511	0.028928	0.054617	0.0787	-0.106698	0.078531	0.140997	0.132677	0.136441	0.056951	0.062292	-0.003621	-0.042192	0.047418	0.052755	-0.162183	0.030862	-0.009831	0.006272	-0.053704	0.010429	-0.021324	0.064638	0.211817	0.064102	0.062792	0.05168	0.032524	-0.108578
chr2L_19423403_19423764	chr2L_19423403_19423764	3	0.005914	-0.056675	0.17088	0.250058	0.249782	0.019956	0.061258	0.058762	0.041535	0.013204	0.063916	0.041743	0.0238	0.097775	0.14594	0.067604	0.087938	0.051323	0.075363	0.062715	0.134727	0.080134	0.036636	0.187081	0.055836	0.075631	0.081307	0.070143	0.041576	0.009111	-0.023472	-0.153287	0.080071	-0.073585	-0.074386	0.132802	0.008827	-0.010549	0.05185	0.021827	0.019907	0.051706	0.004618	-0.014	0.089399	-0.018949	0.585886
chr2L_19528230_19528416	chr2L_19528230_19528416	3	0.00602	-0.292413	-0.017678	0.099438	0.179275	0.117879	0.144438	0.042085	0.110764	0.020314	0.098623	0.063744	0.054321	-0.023312	0.061318	0.077068	0.122161	0.128675	0.082639	-0.019622	0.052157	0.137195	0.11067	0.077662	0.070195	0.073402	0.062747	0.028435	-0.058277	-0.059373	-0.160336	0.121623	0.071014	-0.080311	0.055277	0.163066	0.022164	-0.000875	0.010203	0.016973	-0.035373	-0.014473	0.082398	0.01989	-0.018741	-0.126154	0.660006
chr2L_19548211_19548599	chr2L_19548211_19548599	3	-0.332038	-0.244368	0.03651	-0.045541	0.17608	-0.010669	0.049347	0.306235	0.110873	0.129104	0.28789	0.154934	0.080364	-0.01603	0.124574	0.103211	0.023308	0.091783	0.099475	0.012591	0.014822	0.130869	-0.003362	0.342341	0.067512	0.176178	0.072859	0.038497	0.000516	-0.0311	-0.069444	0.05792	-0.056304	-0.135453	-0.06912	-0.080694	0.004417	-0.087977	-0.014031	-0.006617	-0.011912	-0.052867	0.033291	0.01702	-0.192947	-0.32134	0.822111
chr2L_19572431_19573239	chr2L_19572431_19573239	3	-0.27356	-0.248438	0.270297	0.085042	0.30879	0.279496	0.376777	0.363501	0.081845	0.033928	0.071655	0.099072	0.13834	0.074655	0.358941	0.12455	0.152776	0.144902	0.205212	0.144171	0.127888	0.139621	0.034465	0.297703	0.156846	0.273883	0.183803	0.057999	0.011169	-0.012167	0.00507	-0.099316	-0.004346	-0.054424	0.002855	-0.146403	-0.011712	-0.040198	-0.020202	0.039177	0.025348	0.003135	0.025942	0.012218	0.112809	0.001005	1.5115
chr2L_20821696_20821904	chr2L_20821696_20821904	3	-0.146041	0.041239	0.14311	-0.022375	-0.015758	0.014973	0.05771	0.088905	-0.012097	0.062303	0.025661	0.029421	0.174046	0.197061	0.410317	0.030791	0.095933	0.106587	0.09152	0.112914	0.087955	0.111838	-0.036219	0.189012	0.102347	0.112129	0.05817	0.082612	0.08795	0.060692	0.061712	0.016169	-0.098923	0.12973	-0.10566	-0.086049	0.033265	0.015903	-0.000275	0.010308	0.071201	0.203236	0.011258	0.075187	0.165984	0.119066	-0.630987
chr2L_20936024_20936405	chr2L_20936024_20936405	3	-0.213323	0.000649	0.034572	-0.006639	-0.073403	0.12323	0.134659	0.060143	0.053471	0.070869	0.084216	0.033639	0.066397	0.028579	0.202486	0.055661	0.164142	0.113125	0.150153	0.047186	0.062272	0.119412	0.039704	0.271541	0.209311	0.21711	0.077057	0.069509	0.145955	0.036527	0.073281	-0.018427	0.037599	0.031936	-0.012557	0.071869	0.015696	0.021789	0.069204	0.051433	0.034592	0.086378	0.037362	0.067454	0.205233	0.147387	-0.216972
chr2L_20961307_20961866	chr2L_20961307_20961866	3	0.128843	-0.036073	0.118716	0.046548	-0.028523	0.074865	0.129872	0.213058	0.013993	0.069566	0.034414	-0.01338	-0.010652	0.034337	0.237115	0.024383	-0.034525	0.025359	0.070838	0.011744	0.034465	0.024347	0.114512	0.279987	-0.018153	0.09055	0.113383	0.035353	0.014911	0.041518	0.020082	0.074303	-0.053381	-0.043788	0.15149	0.223483	0.025173	-0.012882	0.052295	0.012644	0.063787	0.107202	-0.068091	0.032068	0.114117	0.199695	-0.295113
chr2L_20987708_20988000	chr2L_20987708_20988000	3	-0.036417	0.303177	0.170828	0.167692	-0.039494	0.037771	0.005585	0.007374	-0.146056	0.004902	0.048857	-0.010957	-0.048933	0.021909	0.224212	0.018406	-0.055292	0.026194	0.05287	0.037734	0.08266	0.064055	0.087237	0.136039	-0.031337	0.041815	0.024208	0.013082	0.00543	0.037731	0.008523	-0.099505	0.017203	0.054808	0.048352	-0.072527	0.064883	0.048351	-0.034201	0.048624	0.001964	-0.001539	-0.019762	0.021949	0.234949	0.015943	-0.395545
chr2L_21096650_21096889	chr2L_21096650_21096889	3	0.055027	-0.086671	0.114425	0.16124	-0.027716	-0.035411	-0.03676	-0.02987	0.029795	0.000668	0.006726	0.060545	0.025242	-0.005573	0.088586	-0.082362	0.046009	0.095975	0.012402	-0.021756	0.031702	0.046511	0.039536	0.145035	0.05453	0.040018	0.001186	0.038246	0.024085	-0.001589	0.040634	-0.12373	0.059864	0.00134	-0.018596	0.203641	0.013001	0.007173	0.088376	-0.027906	0.007171	-0.011639	0.192106	0.031904	0.13884	0.2594	-0.001433
chr2L_21250450_21251182	chr2L_21250450_21251182	3	0.047793	-0.053066	0.090843	0.029708	0.228044	0.036151	-0.028931	0.063018	0.002619	-0.059538	0.171269	0.184864	0.271141	0.349408	0.096358	0.091198	0.187709	0.171002	0.150966	0.315861	0.381928	0.176769	0.075471	0.327851	0.304696	0.204984	0.124467	0.064492	0.244608	0.046256	0.110783	-0.117239	-0.027699	-0.168955	-0.079877	-0.041229	0.013729	-0.055585	0.002611	0.203746	0.076836	0.039649	0.274348	0.061347	0.102459	0.00589	-0.332259
chr2L_2130202_2130577	chr2L_2130202_2130577	3	-0.029124	0.009782	0.009041	0.077201	0.025388	0.003824	-0.039083	0.071163	0.003841	-0.015503	0.16806	0.48451	0.576309	0.63176	0.022477	0.068936	0.015542	0.145277	0.05786	0.18545	0.296294	0.14767	-0.002996	0.173361	0.048844	0.311406	0.09014	0.058681	0.014913	-0.010113	0.030892	0.038121	-0.045502	-0.114661	0.026952	0.127718	0.005751	0.003102	0.067888	-0.001092	0.015494	0.068624	0.128974	0.028854	-0.056862	-0.184262	-0.359899
chr2L_2164479_2164893	chr2L_2164479_2164893	3	-0.032615	-0.152442	0.334039	0.165898	0.285558	0.058965	0.223527	0.34395	0.340364	0.281483	0.081939	-0.016219	-0.032758	0.011402	0.094704	0.101204	0.087661	0.041406	0.06582	0.08354	0.071833	0.034412	-0.033458	0.349036	0.072517	0.050883	0.050071	0.059648	0.071943	0.029883	-0.027476	0.017291	0.097795	0.172782	0.034617	0.193482	0.029015	0.03964	0.08585	0.039711	0.019476	0.033351	-0.035318	0.083803	0.138507	-0.029508	0.178016
chr2L_2178021_2178177	chr2L_2178021_2178177	3	-0.196553	-0.301497	-0.031411	0.131013	-0.006803	0.134752	0.281694	0.182284	0.056096	0.014528	0.102683	0.073434	0.177075	0.066377	0.040517	0.083692	0.193202	0.179063	0.236795	-0.020276	0.077461	0.073048	0.061482	-0.039621	0.198681	0.183156	0.177052	0.094639	0.140926	-0.019079	0.012782	-0.207953	-0.029828	0.049985	-0.102011	-0.026365	-0.006388	-0.065115	-0.008114	-0.059105	-0.004947	-0.001459	0.067277	0.076135	0.167701	-0.023611	1.45233
chr2L_2178612_2178992	chr2L_2178612_2178992	3	-0.191324	-0.125246	0.051917	0.130352	0.075285	0.333367	0.37102	0.21377	0.121465	0.088178	0.079594	0.092061	0.164955	0.060067	0.081208	0.09287	0.097525	0.145069	0.197512	0.257445	0.084335	0.07283	0.341469	0.14367	0.143609	0.2064	0.09484	0.080187	0.090751	0.077998	-0.027287	0.042956	-0.132552	-0.133272	-0.133939	0.079556	0.011685	-0.036581	0.058456	0.025001	-0.010423	0.008635	0.026983	0.069589	0.032261	-0.105435	1.08385
chr2L_21899283_21899550	chr2L_21899283_21899550	3	-0.233587	-0.277913	-0.180132	-0.084241	-0.157035	0.241265	0.189837	0.162337	0.074721	-0.009751	0.104448	0.256527	0.062077	0.005016	0.16629	-0.02684	0.139953	0.330518	0.075026	0.079854	0.295115	0.309229	0.177954	0.027328	0.229662	0.255195	0.088454	0.024167	0.08095	-0.014892	-0.057501	0.153455	-0.100485	-0.180528	-0.164212	0.078059	-0.009728	-0.073372	0.040205	0.231709	-0.05118	-0.00122	0.015931	0.078761	-0.126607	-0.254461	0.084505
chr2L_2196530_2197340	chr2L_2196530_2197340	3	-0.189297	0.053081	0.014725	0.005704	0.085418	0.049336	0.033413	0.035978	0.083911	-0.032355	0.210726	0.246451	0.115073	0.177304	0.979548	0.107305	0.124955	0.168496	0.108203	0.024373	0.045357	0.106469	0.099633	0.296394	0.170085	0.417797	0.272046	0.077842	0.10721	0.101809	0.108586	0.102154	-0.018261	0.078629	0.050747	0.144168	0.02071	0.027874	0.075829	-0.024679	0.021545	0.041181	0.119348	0.089699	0.271192	0.08653	-0.089343
chr2L_2197547_2197843	chr2L_2197547_2197843	3	-0.49676	0.231786	-0.062646	-0.256267	-0.214126	0.126779	0.017661	-0.022791	-0.144605	-0.034923	0.35867	0.231481	0.099638	0.059414	0.169036	0.005101	0.1055	0.139532	0.155493	0.175996	0.188668	0.110656	0.022985	0.30507	0.393652	0.176273	0.129827	0.117937	0.39465	0.096565	0.22106	-0.070421	-0.105129	-0.019446	-0.224566	-0.081803	0.012408	-0.032585	-0.028236	-0.032715	-0.004813	0.001416	0.028952	0.000414	0.442047	0.266307	-0.049145
chr2L_2200366_2200513	chr2L_2200366_2200513	3	-0.09059	0.034697	0.045511	-0.14899	0.005619	-0.015753	-0.040559	-0.032269	-0.086893	0.008926	0.055668	0.030072	-0.013818	-0.01367	0.486319	-0.034008	-0.013842	0.001473	0.048358	0.031007	0.085486	-0.025363	0.049272	0.257002	0.069909	0.064171	0.007333	0.044206	0.01435	0.06781	0.093201	-0.013793	-0.065207	-0.11043	-0.122614	-0.055575	0.032636	0.005942	-0.060358	-0.013891	-0.101923	0.002613	-0.02676	0.020311	0.289263	0.08919	-0.557004
chr2L_2203213_2203603	chr2L_2203213_2203603	3	-0.10701	0.007478	-0.058268	-0.116744	-0.090212	0.094161	-0.000532	-0.016344	-0.010306	-0.063094	0.020372	-0.002724	-0.003174	-0.036919	0.273764	0.000644	0.00302	0.029387	0.074811	0.009089	0.090337	0.087437	0.080299	0.169863	0.115971	-0.004428	0.009498	0.012638	0.119478	0.060081	0.049156	0.007669	0.035808	0.076763	0.011797	0.212553	0.035577	0.03275	0.099531	0.034884	-0.00182	0.000604	0.045473	0.048526	0.234114	0.08088	-0.499003
chr2L_220480_220722	chr2L_220480_220722	3	-0.054613	-0.372645	0.156415	0.168725	0.289553	0.042829	0.026616	0.053914	0.101357	-0.00014	0.047496	0.085593	-0.010022	-0.028489	-0.032221	0.079022	0.137882	0.113076	0.017497	0.040246	-0.020996	0.057265	-0.032817	0.415005	0.025016	0.087297	0.059375	0.004102	-0.040616	-0.033173	0.007499	-0.022088	0.107152	0.016841	0.049847	-0.141695	0.030159	-0.024607	-0.067875	0.022379	0.01255	-0.033081	0.252706	0.136791	0.108455	0.051872	-0.073406
chr2L_221990_222444	chr2L_221990_222444	3	-0.103341	-0.232515	0.428442	0.232175	0.057987	0.070915	0.105244	0.100642	0.214143	0.12322	0.036643	0.035702	-0.012909	0.029451	0.029001	-0.006472	0.204145	0.097881	0.136825	0.075809	0.074728	-0.029324	-0.040168	0.455757	0.099537	0.121738	0.052525	0.024348	-0.026804	-0.031127	-0.057724	-0.082713	-0.029403	0.112653	-0.01216	0.079688	0.035453	0.051864	0.06224	-0.053722	-0.01216	0.039998	0.210353	0.129676	0.394181	0.274485	0.130688
chr2L_223862_224692	chr2L_223862_224692	3	0.056919	-0.141705	0.332069	0.170053	0.01547	-0.009627	0.13491	0.203888	0.179555	0.09846	0.456155	0.13671	0.067373	0.08876	0.266932	0.127019	0.1341	0.122056	0.144508	0.034517	0.088136	0.108609	0.133394	0.420814	0.136531	0.160036	0.196322	0.074281	0.091357	0.005459	0.035885	-0.015958	0.066605	0.109218	0.084444	0.068883	0.037057	0.005077	0.017939	-0.022363	0.030602	0.055244	0.1637	0.057382	0.299392	0.09456	0.060193
chr2L_2242142_2242512	chr2L_2242142_2242512	3	0.055604	0.023358	-0.054665	-0.002383	-6e-05	-0.017385	0.026003	0.035689	0.032531	-0.028966	0.012947	0.007311	-0.008574	-0.033809	0.020506	0.010819	0.017869	0.050481	0.036988	-0.045415	-0.070046	0.121424	0.012208	0.22267	0.032317	0.004041	0.041026	0.015794	-0.065762	0.08957	-0.030365	0.119672	0.011531	-0.000706	0.050156	0.112493	0.022369	-0.003193	0.066508	-0.026945	-0.028048	-0.00792	0.024427	0.023232	0.018546	-0.089133	0.137308
chr2L_2362918_2363266	chr2L_2362918_2363266	3	-0.262793	-0.266459	-0.012926	0.05197	0.106193	0.180423	0.341577	0.360387	0.277457	0.159355	0.075885	0.099744	0.077563	0.003173	0.103035	0.116608	0.111408	0.105172	0.101336	0.081323	0.092175	0.139529	0.127762	0.090197	0.033372	0.160847	0.094131	0.055419	-0.055666	0.023214	-0.039894	0.040289	0.065363	-0.037105	-0.019236	0.040954	0.010688	-0.049546	0.017484	0.041955	-0.013099	-0.021745	0.093189	-0.009819	-0.114664	-0.237249	1.03833
chr2L_246597_247103	chr2L_246597_247103	3	-0.194459	-0.099207	0.349754	0.372649	0.314243	0.109831	0.02238	0.011324	0.01679	0.002259	0.096715	0.059994	0.112374	-0.020403	0.030321	0.122315	0.13394	0.069634	0.028334	-0.020851	0.055191	0.141275	0.114171	0.469502	0.048098	0.101731	0.101757	0.038652	-0.019674	-0.000445	0.000283	-0.165935	-0.104913	-0.065096	0.013776	-0.120108	-0.015031	-0.022742	-0.039705	-0.003463	0.05485	0.046369	-0.000833	0.150925	0.281361	-0.030818	0.169234
chr2L_2753007_2753325	chr2L_2753007_2753325	3	-0.320531	-0.117739	-0.003279	0.07695	0.091597	0.331422	0.288891	0.188157	0.073737	0.02883	0.106545	0.086615	0.155867	0.038616	0.042356	0.056216	0.143765	0.129636	0.188594	0.124769	0.137983	0.14729	0.355571	0.014095	0.086594	0.112585	0.098471	0.072162	0.083451	-0.012296	-0.023442	-0.111139	0.113338	-0.084917	-0.139284	-0.032102	0.001699	-0.058845	-0.023656	0.016654	0.002288	0.037096	0.128968	0.053558	0.123833	-0.016244	1.26092
chr2L_2755166_2755605	chr2L_2755166_2755605	3	-0.036981	-0.218856	-0.09929	0.114415	0.179869	0.099896	0.296711	0.215769	0.249193	0.103552	0.101978	0.10454	0.075136	-0.00084	0.09091	0.080155	0.064728	0.112573	0.084834	0.015252	0.071391	-0.006227	-0.005237	0.180261	0.117995	0.160365	0.099438	0.036074	-0.055788	0.027094	-0.041587	-0.077856	0.064132	-0.043118	-0.008962	0.078595	0.004444	0.017453	0.033071	0.040031	-0.001498	-0.03912	0.119399	0.071028	0.028469	-0.071712	0.766752
chr2L_2804880_2805124	chr2L_2804880_2805124	3	-0.133396	-0.027382	0.035417	-0.032929	-0.083103	-0.045873	0.065998	0.058244	-0.014428	0.036457	0.146365	0.021377	0.002826	0.010191	0.074473	0.001073	0.036462	0.120574	0.15305	0.112008	-0.039351	0.009346	-0.006084	0.235132	0.178054	0.178768	0.168805	0.052069	0.15267	0.078457	0.112873	-0.162456	-0.014414	0.107768	-0.091762	-0.013548	0.01613	-0.012885	0.074192	-0.0428	0.059361	0.067126	-0.031958	0.04108	0.195629	0.118816	-0.034428
chr2L_3124700_3124975	chr2L_3124700_3124975	3	0.069703	0.027656	-0.008328	0.028846	0.118988	0.03567	0.090263	-0.035852	0.109384	-0.038665	0.057213	0.06196	0.000172	0.045634	0.018095	0.045294	0.075074	0.049804	0.069923	0.047949	0.038532	0.057158	-0.007471	0.147762	0.333202	0.050716	0.003956	0.047394	0.026591	0.044019	0.016481	-0.146037	2.8e-05	0.166818	-0.012	0.203321	0.020586	0.049844	0.102147	0.063233	0.048084	0.00068	0.019748	0.080673	0.205251	0.257067	-0.124083
chr2L_3301851_3302496	chr2L_3301851_3302496	3	-0.113129	-0.071878	-0.015822	0.008893	0.134643	0.153509	0.049829	0.090405	0.071466	0.003559	0.084266	0.175729	0.131206	0.058579	0.361391	0.076746	0.105431	0.353316	0.229591	0.239671	0.237657	0.232736	0.134686	0.201949	0.19256	0.13865	0.140357	0.137536	0.300292	0.073047	0.147969	-0.072296	0.039029	-0.035246	-0.098631	0.168786	0.015905	0.023259	0.063429	0.140531	0.101377	0.083338	0.120606	0.085604	0.078675	-0.07477	0.10729
chr2L_3303126_3303279	chr2L_3303126_3303279	3	-0.325499	-0.147565	-0.143495	-0.16092	0.142428	0.17087	0.019982	0.085867	-0.04736	-0.013357	0.092434	0.324949	0.13939	0.110395	0.071754	0.010595	0.040057	0.082776	0.113963	0.182011	0.096065	0.059782	0.104427	0.166477	0.106862	0.02828	0.042339	0.036342	0.076242	-0.018501	0.047031	0.06804	-0.035661	-0.14826	-0.172525	-0.068992	0.022865	0.019548	-0.019332	0.049756	-0.026309	0.015983	0.014277	0.039357	0.056239	0.000212	0.390568
chr2L_3354772_3355011	chr2L_3354772_3355011	3	-0.23566	-0.127253	0.023257	-0.020464	-0.050779	0.000152	-0.011854	-0.02569	-0.020014	-0.052683	0.068163	-0.03255	0.02293	0.036206	0.115237	0.008501	-0.033433	0.082809	0.112468	0.033596	0.032999	0.20971	0.05178	0.224383	0.052463	0.058707	0.070216	0.036322	0.055094	0.010335	0.009859	-0.038742	-0.00369	-0.052622	-0.048114	0.035618	0.025389	-0.023404	0.004294	-0.03442	0.075924	0.028064	-0.03782	0.039917	0.020361	-0.036282	-0.247237
chr2L_3534106_3534607	chr2L_3534106_3534607	3	-0.049809	0.141722	-0.074939	-0.077907	-0.06066	0.090889	-0.028411	0.032108	-0.007049	-0.089667	0.02066	0.009323	0.053269	0.093324	0.056859	0.07925	0.041745	0.076891	0.072423	0.114776	0.140369	0.137905	0.176182	0.198458	0.563831	0.557381	0.43753	0.273303	0.511766	0.32978	0.480205	-0.214203	0.031188	-0.12308	0.009671	0.124613	0.005278	-0.014597	0.047643	0.042955	-0.026681	0.071653	-0.046911	0.036454	0.154775	-0.01426	-0.150662
chr2L_3545306_3545585	chr2L_3545306_3545585	3	0.101197	0.745808	-0.106359	-0.110154	-0.277374	0.003754	0.040774	-0.063696	-0.077067	-0.051343	-0.02337	-0.057249	-0.050565	-0.010036	-0.050701	0.003862	0.050601	0.082358	0.025697	-0.027807	0.053151	0.096459	0.053415	0.314601	0.176915	0.099661	0.039792	0.09006	0.10206	0.350277	0.147619	-0.017104	-0.272413	0.063541	-0.049295	0.064082	0.001118	0.041385	0.087248	-0.022149	-0.003615	-0.034286	-0.091459	0.010921	0.386604	0.419625	0.115685
chr2L_3632108_3632549	chr2L_3632108_3632549	3	-0.23912	-0.144212	0.007253	-0.079607	0.03687	0.036665	0.039506	0.078023	0.001995	-0.040805	0.046961	0.070241	0.076274	0.171534	0.630163	0.141502	0.087822	0.209854	0.092268	0.197958	0.289719	0.277577	0.119063	0.131676	0.23744	0.154785	0.304254	0.102728	0.186919	-0.003519	0.023519	-0.132566	0.040584	-0.074368	-0.133543	0.081699	0.004097	-0.019924	0.00044	0.145463	0.057285	0.12334	0.225401	0.048875	0.020526	-0.11023	0.219147
chr2L_3657405_3657707	chr2L_3657405_3657707	3	-0.065322	-0.206125	-0.062032	-0.046437	0.103341	-0.048704	-0.020815	0.047614	-0.06173	-0.113183	0.077123	0.06938	0.721194	0.765764	0.189444	-0.031091	0.007966	0.149565	-0.054061	0.185859	0.414414	0.034353	-0.041247	0.14227	0.188385	0.275833	0.153069	0.011556	0.141576	0.093676	0.036837	-0.049591	0.02652	-0.242795	-0.137991	0.014087	0.007913	-0.054798	0.01422	-0.03318	0.061081	0.047091	-0.077584	0.049149	-0.119863	-0.374768	-0.547474
chr2L_3771588_3771790	chr2L_3771588_3771790	3	-0.028489	-0.255103	0.016546	0.117057	0.083244	-0.042592	0.107803	0.171128	0.058518	0.117028	0.067366	0.088922	0.050892	-0.025502	0.053733	0.088756	0.071381	0.120944	0.100997	0.123889	-0.131185	0.100179	0.098851	0.156986	0.104854	0.234763	0.161641	-0.00478	-0.018165	0.046895	-0.032874	-0.024451	0.044321	-0.041424	-0.008268	0.161584	0.021491	0.005694	0.00716	-0.00428	-0.026736	-0.002906	0.042475	0.015144	0.131132	-0.034582	0.294105
chr2L_3779506_3779660	chr2L_3779506_3779660	3	-0.199921	-0.288217	0.231596	0.266442	0.383145	0.154496	0.054766	0.187646	-0.062984	0.06326	-0.083077	-0.082074	-0.053139	-0.038276	0.080169	0.011026	-0.074322	0.012161	0.08661	0.030549	0.114536	0.130246	0.08514	0.417987	-0.073171	0.086284	0.070368	0.040332	-0.084202	-0.03853	-0.095538	-0.31025	-0.099887	0.021512	0.151696	-0.182551	0.019025	0.002349	-0.127181	-0.013995	-0.059882	-0.074972	-0.030314	0.014197	-0.025679	-0.282885	0.010697
chr2L_3896078_3896302	chr2L_3896078_3896302	3	-0.247188	-0.010803	-0.042026	0.001439	0.197056	0.185762	0.19394	0.205426	0.16671	0.093912	0.072766	0.081088	0.050474	0.046696	0.240173	0.059238	0.046386	0.075732	0.076212	0.141268	0.112996	0.08945	0.217669	0.086443	0.148494	0.186202	0.131076	0.058684	0.144726	-0.011767	0.002464	0.001413	-0.032575	-0.062433	-0.173242	0.133386	0.006545	-0.027072	0.034468	0.08773	0.025473	0.008171	-0.003902	0.046585	-0.065024	-0.17238	1.32532
chr2L_3896536_3896817	chr2L_3896536_3896817	3	-0.139166	-0.139239	-0.084438	-0.021701	0.107029	0.196566	0.060704	0.11074	0.004954	-0.009822	0.098685	0.062734	0.101828	0.038807	0.297958	0.09204	0.061668	0.122396	0.107929	0.213126	0.293328	0.247305	0.245119	0.076953	0.24659	0.153766	0.160629	0.034951	0.107668	-0.012309	0.030873	-0.11845	0.083689	-0.122575	-0.175654	0.094736	0.009563	-0.021435	0.023211	0.119882	0.063344	0.046591	0.107573	0.008457	-0.081047	-0.367858	0.552072
chr2L_4282985_4283161	chr2L_4282985_4283161	3	0.068274	0.263972	-0.142406	-0.067434	-0.11517	-0.038646	0.019259	0.003882	-0.017879	-0.066491	-0.001379	0.008627	-0.048075	-0.040951	-0.014544	-0.040153	0.016319	0.053001	0.047863	0.001566	-0.06506	-0.061526	-0.053553	0.058748	0.006011	0.032824	0.016025	0.009453	0.015995	0.051777	0.040878	-0.091928	-0.067252	0.094436	0.008094	0.045027	0.011852	0.064587	0.058776	-0.019391	0.018976	-0.019099	-0.096491	0.016218	0.151473	0.267721	0.078416
chr2L_430902_431402	chr2L_430902_431402	3	-0.285773	-0.051741	0.026236	-0.095356	-0.080962	0.360984	0.270106	0.236332	-0.041875	0.020525	0.122764	0.000728	0.049219	0.000136	0.040808	-0.023115	0.116261	0.119065	0.1296	0.17483	0.314261	0.346497	0.433397	0.043513	0.142927	0.084627	0.040188	0.055471	0.073269	-0.014686	0.043035	-0.069165	-0.140976	-0.269167	-0.030122	0.432431	0.000316	-0.018801	0.190684	0.100962	0.027397	-0.013015	-0.050234	0.043542	0.006868	0.036061	1.46966
chr2L_4333168_4333496	chr2L_4333168_4333496	3	-0.11216	-0.082159	-0.059755	0.012377	0.086983	-0.002524	0.036951	0.171538	0.080485	-0.027675	0.113915	0.150561	0.049825	0.021523	0.195011	0.052737	0.021819	0.119756	0.119924	0.162061	0.092628	0.063961	0.177348	0.055519	0.071881	0.090261	0.137376	0.053209	0.070117	0.053817	-0.006815	-0.039979	-0.028997	-0.025467	-0.07502	0.086993	0.017043	0.012164	0.031885	0.039401	0.029525	-0.035569	-0.004644	0.074168	0.059178	0.04241	-0.473281
chr2L_4371753_4372102	chr2L_4371753_4372102	3	-0.125335	-0.146026	0.103919	0.052423	0.003794	0.224992	0.14897	0.187718	0.073396	0.037678	0.051018	0.025632	0.053356	-0.003536	0.270909	0.118369	0.188963	0.105203	0.128454	0.134137	0.157783	0.150478	0.269331	0.129171	0.121997	0.208282	0.124934	0.052756	0.027953	0.005218	0.038091	0.014664	-0.109297	-0.107831	-0.04971	-0.007403	0.011427	-0.045902	0.016943	0.114792	-0.019442	0.016437	0.027381	0.076705	0.111642	0.049179	1.41679
chr2L_472184_472486	chr2L_472184_472486	3	0.024281	-0.288478	0.1342	-0.035556	0.03245	-0.044637	0.003093	0.05275	0.074532	0.051789	0.08186	0.312008	0.124109	0.042248	0.188772	0.031344	0.081598	0.049783	0.055468	0.086626	0.042318	0.220771	0.020311	0.216406	0.02256	0.163234	0.002832	0.011195	-0.073186	-0.062614	-0.028322	0.080002	0.020343	-0.130853	0.090747	0.427649	0.017687	0.004464	0.176111	0.053823	-0.00511	0.023996	-0.008466	0.049961	0.052989	-0.110767	0.357058
chr2L_490588_490960	chr2L_490588_490960	3	-0.11474	0.007585	0.027522	0.24525	0.143144	0.119945	0.184728	0.078203	-0.000784	0.031942	0.12479	0.236373	0.43583	0.301046	0.075412	0.199364	0.113657	0.09232	0.087085	0.182109	0.142282	0.201469	0.331201	0.017809	0.085674	0.114647	0.045375	0.063333	0.08297	0.036	0.065059	-0.019244	-0.026835	-0.061814	0.018223	0.27664	0.012409	-0.002699	0.102868	0.046271	0.123808	0.136483	0.034784	0.019521	0.143939	5.5e-05	1.39289
chr2L_497911_498083	chr2L_497911_498083	3	-0.266786	-0.237137	0.409089	0.432191	0.252984	0.15881	0.083609	0.225399	0.103915	0.174634	0.101071	0.110843	0.023248	-0.030075	-0.102671	0.241086	0.022375	0.017256	0.087774	0.002541	0.095713	0.17159	0.052561	0.377204	0.090494	0.159266	0.035216	-0.037384	-0.0502	-0.04005	0.028944	-0.163352	-0.21313	-0.066267	-0.026328	0.130293	-0.000949	-0.062675	-0.017782	0.029058	-0.029913	-0.027136	-0.054473	-0.056744	0.061794	-0.261239	0.223751
chr2L_5107758_5108698	chr2L_5107758_5108698	3	-0.085629	-0.118096	0.114897	-0.089354	0.036056	0.114295	0.034873	0.073905	-0.015225	0.018298	0.067725	0.018813	0.008485	-0.012592	0.289702	0.014243	0.047819	0.205767	0.16317	0.144088	0.172068	0.132367	0.275529	0.351535	0.226624	0.072592	0.053077	0.030416	0.09022	0.030113	0.065131	0.010904	-0.072711	-0.045693	0.148553	-0.052411	0.016023	-0.037436	0.012352	0.093837	0.023853	-0.044816	-0.030879	0.007365	0.000291	-0.044383	-0.481615
chr2L_5145904_5146196	chr2L_5145904_5146196	3	-0.424393	-0.278683	-0.095646	-0.124562	-0.097218	0.103701	-0.051608	-0.014574	-0.088924	-0.09272	0.044104	0.09852	0.079181	0.011496	0.116357	0.05453	0.05442	0.370003	0.178698	0.070753	0.140154	0.144767	0.137962	0.026545	0.166073	0.127551	0.105873	0.058143	0.104815	-0.043914	0.003002	-0.203293	-0.174417	-0.18082	-0.292804	-0.125312	-0.018813	-0.1092	-0.054921	0.042317	-0.02668	0.00226	-0.020248	0.018712	-0.046425	-0.126267	-0.027033
chr2L_523044_523934	chr2L_523044_523934	3	-0.146469	0.052466	-0.033216	0.135564	-0.023487	0.202554	0.21959	0.242032	0.219171	0.149194	0.089416	0.0662	0.102796	0.024703	0.171994	0.171451	0.161828	0.17162	0.249691	0.156	0.103883	0.196457	0.068332	0.222115	0.294567	0.191578	0.140217	0.105036	0.160617	-0.000336	0.070774	-0.072869	-0.052478	0.016931	-0.047841	0.11427	0.005704	-0.02342	0.117175	-0.014026	0.036715	0.090111	-0.002897	0.080927	0.313722	0.154981	0.967917
chr2L_5237288_5237721	chr2L_5237288_5237721	3	0.164508	0.135841	0.272403	0.245905	0.003536	0.116398	0.03917	0.002649	-0.04898	0.019644	0.00178	-0.069098	-0.01213	-0.020023	0.137249	0.002049	-0.003145	0.0389	0.047552	0.074607	0.099001	-0.002573	-0.006267	0.131463	0.040681	0.007184	0.018365	-0.015947	0.016994	0.026114	-0.012322	-0.165939	-0.01447	0.186026	0.134429	0.141092	0.048202	0.066427	-0.004226	-0.001049	-0.034739	-0.070989	-0.05413	0.019326	0.14924	-0.015643	0.104053
chr2L_524583_524925	chr2L_524583_524925	3	-0.272659	0.032375	0.052068	0.283546	0.048859	0.179944	0.246054	0.184865	0.068324	0.136708	0.082818	0.038851	0.089025	-0.022209	0.146888	0.2488	0.097244	0.151452	0.284788	0.267402	0.21763	0.139863	0.19038	0.150323	0.147966	0.215803	0.206129	0.101979	0.061471	0.07205	0.055406	-0.128145	-0.077086	0.039368	-0.068457	0.031709	0.014451	0.006835	0.041356	0.039046	0.055747	0.010594	0.058184	0.031961	0.284168	0.100564	0.905837
chr2L_5306451_5306988	chr2L_5306451_5306988	3	-0.264051	-0.069686	-0.013289	-0.016203	-0.060159	0.090038	0.191106	0.200728	0.083872	0.050889	0.111149	0.052654	0.156222	0.118964	0.045332	0.139598	0.141835	0.168592	0.191868	0.390417	0.127799	0.167583	0.254919	0.078359	0.216364	0.326439	0.368991	0.141005	0.245474	0.040949	0.046885	-0.117029	-0.031384	-0.097912	-0.162817	0.057632	-0.000859	-0.056787	0.018268	0.034095	0.045484	0.314135	0.122111	0.108294	0.049518	0.038019	1.15902
chr2L_5800135_5800327	chr2L_5800135_5800327	3	-0.078736	-0.127385	-0.053327	0.046749	0.00239	-0.027062	0.051728	0.085686	0.072365	0.005516	0.133575	0.412747	0.375106	0.377433	0.146187	0.029874	0.02659	0.128291	0.04922	0.067561	0.124355	0.171052	0.053295	-0.041042	0.022495	0.05208	0.086479	0.050359	-0.066816	-0.007399	-0.016648	0.075361	-0.013859	-0.080486	-0.024162	0.206808	0.013421	-0.015139	0.027773	0.003907	-0.002482	0.022271	0.037107	0.071552	0.041045	-0.018166	0.911903
chr2L_5879472_5879616	chr2L_5879472_5879616	3	-0.015514	-0.032904	-0.11093	-0.110651	-0.06692	-0.080276	-0.006161	-0.013128	0.009802	-0.039356	0.032901	0.037653	0.001983	0.017751	0.041214	0.000646	-0.010966	0.007445	0.011449	-0.074965	-0.055769	0.056648	-0.053177	0.119527	-0.043574	0.000556	0.014785	-0.018555	-0.04271	0.013073	-0.043986	-0.053661	-0.03023	-0.028001	0.066341	0.027569	0.019169	0.012269	0.035042	-0.053918	-0.000418	0.019018	-0.076369	0.030698	0.049031	0.023121	-0.468896
chr2L_5943733_5944032	chr2L_5943733_5944032	3	0.031765	-0.047196	-0.021228	-0.012532	-0.037876	0.143213	0.173685	0.224752	0.027855	-0.012203	0.408535	0.506483	0.328347	0.352949	0.081393	0.098232	0.029044	0.30338	0.034017	0.163715	0.167678	0.1724	0.155702	0.038125	0.114488	0.167667	0.011988	0.087356	0.036442	0.174389	0.146671	0.142733	0.001711	-0.052022	-0.138874	0.05731	-0.004177	-0.043658	0.009296	0.072562	-0.003671	-0.026798	0.02724	0.011132	-0.105686	-0.115704	0.834377
chr2L_6088404_6088732	chr2L_6088404_6088732	3	-0.342732	-0.177823	-0.000294	0.049023	0.133922	0.057199	0.050985	0.027122	0.031285	0.003017	0.132522	0.062867	0.078302	0.082614	-0.007943	0.063986	0.166945	0.083864	0.012115	0.000175	0.075012	0.181069	0.045531	0.180338	0.175933	0.190339	0.125494	0.058913	0.113882	0.007445	0.081541	-0.029668	0.114416	0.046476	-0.000608	0.201343	0.000441	0.000805	0.070761	0.066992	0.082122	0.14182	0.084472	0.104216	0.102979	-0.142708	-0.27164
chr2L_6339244_6339511	chr2L_6339244_6339511	3	-0.115765	-0.012804	-0.03046	0.120421	0.16278	0.020944	0.263953	0.187158	0.169292	0.057234	0.16949	0.212541	0.109742	0.108809	0.133811	0.077569	0.241066	0.202147	0.113074	0.041352	-0.033771	4.2e-05	-0.069485	0.123219	0.111038	0.164206	0.099885	0.06655	0.101357	0.061066	0.059793	0.060985	-0.066285	0.06639	-0.047932	0.08756	0.019456	0.004525	0.077855	-0.017757	0.012326	0.052282	0.095048	0.126819	0.244094	0.15886	1.28598
chr2L_6612465_6612625	chr2L_6612465_6612625	3	-0.413582	-0.240181	-0.152245	-0.050507	0.07149	0.17368	0.22981	0.204994	-0.027675	0.020819	0.077475	0.071602	0.057155	0.072971	0.230171	0.055763	0.244074	0.189876	0.135659	0.507928	0.008748	0.060144	-0.091719	0.067691	0.024108	0.146892	0.155775	0.12775	-0.008069	0.045275	-0.016186	-0.066044	-0.153232	-0.179092	-0.106459	0.055004	0.019988	-0.062502	0.00469	-0.043592	0.067968	-0.028836	0.010425	0.06446	-0.062923	-0.116394	0.474217
chr2L_6709059_6709211	chr2L_6709059_6709211	3	0.24033	0.052775	-0.078096	-0.079939	0.064836	0.0373	0.002072	0.074704	-0.00927	-0.068224	0.033106	0.083787	-0.018363	-0.044017	-0.030646	0.038083	-0.004039	-0.00811	0.037204	0.022448	0.058961	0.056886	-0.07661	0.111104	0.036839	0.037162	0.000183	0.00585	-0.024078	0.028281	0.026065	0.093333	-0.165553	0.077396	0.072501	-0.042577	0.01413	0.02218	0.032459	0.024522	0.032972	-0.025147	-0.032644	0.036811	0.061116	0.066183	0.534642
chr2L_6792048_6792287	chr2L_6792048_6792287	3	-0.153027	-0.199339	0.010785	-0.040289	0.170511	-0.025023	0.175267	0.228209	0.145722	0.073212	0.16408	0.12912	0.038638	0.073167	0.044812	0.027092	0.065308	0.060788	0.010907	-0.014797	-0.003029	0.118442	-0.020401	0.057812	0.027219	0.129452	0.093951	0.037559	0.021918	-0.000771	-4.1e-05	0.107372	0.0874	-0.106888	-0.113806	0.051459	0.013741	-0.015966	0.032099	-0.048783	0.114278	-0.030131	0.075546	-0.052819	-0.078351	-0.227375	-0.034364
chr2L_7188684_7188892	chr2L_7188684_7188892	3	-0.001161	-0.044756	0.078145	-0.010168	-0.085368	0.006325	-0.017904	0.014561	0.061527	0.009389	0.098641	0.096552	0.030015	0.022167	0.232368	0.13416	0.106347	0.145121	0.03573	-0.035819	0.021232	0.161824	-0.076952	0.092784	0.283822	0.116996	0.118376	0.022445	0.124047	0.034776	0.013866	0.028655	0.063137	-0.071961	0.073192	0.08229	0.008395	-0.014205	0.013282	-0.040819	0.003907	0.04955	0.107458	0.041256	-0.007375	-0.061205	-0.00765
chr2L_72141_72686	chr2L_72141_72686	3	-0.059835	-0.158367	-0.024217	0.027358	0.275051	0.24301	0.391413	0.417287	0.358088	0.1156	0.263454	0.179443	0.199909	0.263128	0.112307	0.08376	0.134049	0.13638	0.0917	0.014184	0.058861	0.160324	0.142501	0.079018	0.076334	0.138752	0.130864	0.084978	0.021975	0.002912	0.014018	0.109478	0.035286	-0.087422	0.014694	0.031568	0.006312	-0.057996	0.019057	-0.026893	0.053	-0.005223	0.057475	0.025127	-0.000774	0.003232	1.44286
chr2L_7422425_7422768	chr2L_7422425_7422768	3	-0.221056	-0.277813	0.180544	0.006311	-0.054009	0.089509	0.069575	0.260134	0.190106	0.173844	0.070184	0.162928	0.129351	0.071685	0.242298	0.11836	0.102941	0.16294	0.457579	0.098019	0.027041	0.093014	0.128589	0.366492	0.131938	0.217753	0.147207	0.063836	0.081198	0.025091	0.002769	0.145121	-0.113273	-0.036965	-0.058395	0.012369	0.010936	0.003626	0.016934	-0.018511	0.008157	0.09607	0.006022	0.082059	0.282163	0.034278	0.30741
chr2L_8277592_8278153	chr2L_8277592_8278153	3	0.050688	-0.101647	0.232376	0.222679	0.040225	0.178994	-0.001869	0.049074	-0.05093	-0.021705	0.032306	0.076509	0.029362	0.03498	0.270887	0.063611	0.055495	0.208456	0.096326	0.184198	0.134043	0.128571	0.362213	0.176957	0.053443	0.044801	0.130699	0.000665	0.028851	0.006333	0.01837	-0.175968	0.009762	-0.061694	0.039077	0.055441	0.02135	0.003338	-0.013373	0.096883	0.049357	-0.025366	0.024424	0.059467	0.022803	-0.053829	-0.045833
chr2L_841630_842191	chr2L_841630_842191	3	-0.102478	-0.254503	0.331636	0.383329	0.257682	0.230025	0.311485	0.29554	0.216599	0.206972	0.032926	0.084989	0.054757	0.02362	0.486802	0.162987	0.130679	0.180909	0.223336	0.135444	0.244145	0.221203	0.092501	0.280529	0.13692	0.160392	0.160582	0.059646	0.077263	-0.020718	-0.032442	-0.016447	0.050727	0.076192	-0.00046	-0.00909	0.007704	-0.032562	-0.050716	0.04243	-0.015665	-0.00332	0.008061	0.040576	0.159108	0.024926	0.755113
chr2L_8416440_8416705	chr2L_8416440_8416705	3	-0.146791	-0.059482	0.049881	0.184272	0.21099	0.076951	0.229952	0.2303	0.204556	0.083421	0.087506	0.140341	0.017895	-0.007574	0.102247	0.010698	0.147124	0.103763	0.074117	0.055445	0.005338	0.015267	-0.111611	0.075754	0.126579	0.202909	0.061011	0.049917	0.024879	0.046423	-0.00895	0.066906	0.089503	0.087208	-0.106258	-0.068166	0.001681	-0.022437	0.065094	-0.016486	-0.005755	-0.003359	-0.0516	0.032177	0.140817	0.122439	0.971485
chr2L_8423578_8423824	chr2L_8423578_8423824	3	-0.375319	-0.400242	0.399369	0.252083	0.40643	0.150239	0.183646	0.242375	0.108128	0.152793	0.08155	0.094757	0.045998	-0.004343	0.153682	0.177508	0.228258	0.229403	0.1357	0.211467	0.174496	0.134514	-0.068027	0.33692	0.146258	0.204928	0.147834	0.076527	-0.010716	-0.041059	-0.034534	-0.172154	0.035303	0.090866	-0.130597	0.036174	0.017144	-0.022249	-0.008072	0.019481	-0.053097	-0.019975	0.027544	-0.004146	0.281684	-0.008822	0.207699
chr2L_8433561_8433819	chr2L_8433561_8433819	3	-0.03997	-0.174125	-0.063923	0.118529	0.209083	0.021369	0.120509	0.090746	0.182699	-0.018911	0.290568	0.302775	0.248942	0.357632	0.048216	0.066453	0.159746	0.148905	0.117859	0.14154	0.026996	0.053313	0.023265	0.107892	0.059921	0.099902	0.120391	0.076596	0.013332	0.035364	0.027931	0.265465	0.093862	-0.169716	-0.144989	-0.078022	0.017978	-0.011479	0.005228	-0.003166	0.22504	0.509051	0.227429	0.02985	-0.011658	-0.179859	0.858132
chr2L_845741_846241	chr2L_845741_846241	3	-0.179644	-0.049652	0.526255	0.346985	0.365715	0.216413	0.242601	0.266898	0.157718	0.205043	0.075048	0.009805	0.047147	0.042316	0.075926	0.350362	0.182699	0.133714	0.217075	0.097456	0.110046	0.199388	0.049048	0.373628	0.237079	0.152963	0.145221	0.155012	0.144985	0.024459	0.066092	-0.098304	0.065975	0.085064	0.012336	0.073629	0.021837	0.019092	0.054349	0.011953	0.019634	0.010792	0.069637	0.027779	0.299118	0.134494	0.409704
chr2L_8534954_8535440	chr2L_8534954_8535440	3	-0.21087	-0.240534	-0.098738	-0.111724	0.020444	0.06126	-0.078425	-0.004742	-0.00509	-0.043306	0.07927	0.022403	0.037439	0.132546	0.243649	0.150995	0.101054	0.138377	0.085406	0.109732	0.043855	0.199323	0.04934	0.209767	0.056056	0.145527	0.143133	0.047837	0.003539	0.021294	-0.018767	0.014344	0.062416	-0.201083	-0.037454	0.145946	-0.003787	-0.02282	0.03883	0.01959	0.112647	0.216931	0.064969	0.061593	-0.07407	-0.127456	-0.194754
chr2L_868342_868490	chr2L_868342_868490	3	-0.406759	-0.212505	0.090024	0.084223	0.294298	0.137846	0.174842	0.263751	0.372921	0.147876	0.038736	0.176465	0.089488	-0.008452	0.024909	0.108727	0.183309	0.042536	0.063493	0.10721	0.080488	-0.029721	0.134781	0.181554	0.047498	0.095117	0.10759	0.01027	0.075148	-0.022806	0.032752	0.195732	0.356571	-0.023674	-0.254198	-0.113715	-0.001645	-0.018486	-0.056434	0.016562	0.035234	-0.038383	0.173321	0.0896	-0.050839	-0.192687	1.61702
chr2L_8691636_8691897	chr2L_8691636_8691897	3	-0.679908	-0.38611	-0.071473	-0.240211	-0.259538	0.05985	-0.170686	-0.021906	-0.124568	-0.053216	0.196833	0.033046	0.084689	0.056325	0.358509	0.084327	0.143609	0.310333	0.263873	0.348165	0.311051	0.271673	0.12154	0.147555	0.275536	0.29571	0.270634	0.129756	0.152413	-0.018118	0.02899	-0.256075	-0.275612	-0.44804	-0.41957	-0.396768	-0.032208	-0.193279	-0.13609	0.102476	0.007148	0.093113	0.148523	0.018453	0.058248	-0.173536	0.101536
chr2L_8735546_8735976	chr2L_8735546_8735976	3	-0.424497	-0.279435	0.061638	-0.079928	0.048057	0.207361	0.240724	0.195462	0.12254	0.032035	0.093807	0.050465	0.082035	0.054364	0.084132	0.105926	0.124033	0.186185	0.2262	0.095768	0.007328	0.1122	0.037796	0.204756	0.275422	0.133421	0.119311	0.069216	0.110119	0.026518	0.048097	-0.091668	-0.169256	-0.104563	-0.142605	-0.085535	0.004512	-0.09519	-0.019024	-0.019031	0.010095	0.062685	-0.04618	0.100813	0.082161	-0.083018	0.686922
chr2L_8739995_8740427	chr2L_8739995_8740427	3	-0.149832	-0.292022	0.128571	0.034373	0.436753	0.08141	0.235555	0.270466	0.110808	0.031046	0.078964	0.263867	0.250783	0.255969	0.000839	-0.008723	0.027351	0.081278	0.10232	0.043045	-0.003785	0.115043	0.054864	0.269947	-0.022724	0.152942	0.159706	0.016523	-0.055111	-0.000528	-0.104025	0.095653	-0.145148	-0.182425	-0.051476	-0.292178	0.008024	-0.088509	-0.07475	0.021492	-0.045189	-0.024019	-0.057435	-0.020449	-0.200052	-0.291478	0.831657
chr2L_8951099_8951680	chr2L_8951099_8951680	3	-0.105001	0.001756	0.189926	0.159717	0.288254	0.162846	0.177198	0.106585	-0.080541	-0.006501	0.073389	0.06866	0.096409	0.093407	0.221058	0.120888	0.024724	0.117789	0.117848	0.17558	0.073276	0.312779	0.242026	0.281065	0.043822	0.144942	0.084045	0.086175	0.001998	0.040988	-0.01016	0.060524	0.045284	-0.138437	0.090122	0.094646	0.024683	-0.019117	0.035493	0.032389	0.005144	0.030337	0.033764	0.016553	-0.091238	-0.15205	1.062
chr2L_8988980_8989339	chr2L_8988980_8989339	3	-0.209653	-0.236904	0.055482	0.299974	0.216165	0.218726	0.34779	0.272252	0.107523	0.172608	0.047329	0.013487	0.056344	-0.025659	0.051449	0.085666	0.043327	0.061331	0.139532	0.047046	0.004529	0.25652	0.108427	0.036448	0.108508	0.081164	0.073374	0.037693	0.032896	-0.004588	0.018964	-0.052678	-0.117377	-0.001421	-0.091747	0.0174	0.016078	-0.034399	-0.032717	0.002098	0.021995	-0.009765	-0.041055	0.036453	0.147373	-0.036638	0.66329
chr2L_9175183_9175523	chr2L_9175183_9175523	3	-0.153058	-0.284323	0.248583	0.035226	0.135029	-0.039683	0.081908	0.163994	0.008263	0.045428	0.011888	-0.031106	-0.046256	-0.017831	0.071265	0.020501	0.049407	0.059103	0.098812	0.012635	-0.049667	0.093566	-0.01384	0.240333	0.084597	0.112364	0.124297	0.036665	0.043415	0.028044	0.005399	0.016038	0.029035	-0.084351	-0.049152	-0.03055	-0.003255	-0.09643	-0.023935	-0.029676	0.018077	-0.020816	-0.072471	-0.005445	-0.057982	-0.208259	-0.174556
chr2L_9176058_9176490	chr2L_9176058_9176490	3	-0.290104	-0.201649	0.05249	0.192968	0.189037	0.224879	0.274931	0.132979	-0.064279	-0.013904	0.086239	0.044488	0.098501	0.037734	0.091283	0.11987	0.235585	0.206113	0.230216	0.30629	0.16099	0.126785	0.455141	0.050436	0.211051	0.29485	0.25263	0.107487	0.115765	0.095688	0.066792	-0.100563	-0.099537	-0.084989	-0.134465	-0.012365	0.000844	-0.043153	0.013459	0.055893	0.017329	0.042732	-0.015636	0.062858	0.062855	0.005534	1.20638
chr2L_9203362_9203843	chr2L_9203362_9203843	3	-0.23567	-0.213335	0.364868	0.284579	0.311641	0.177861	0.008755	0.142696	0.003093	0.032478	0.040514	0.056656	0.042399	0.014716	0.067282	0.149629	0.186147	0.132852	0.185433	0.208309	0.192702	0.104425	0.25611	0.347412	0.128199	0.238465	0.161479	0.021816	0.140919	-0.00697	0.038092	-0.180443	0.022571	-0.076189	0.017012	-0.183134	0.008947	-0.059571	-0.093882	0.097082	-0.011586	0.013941	-0.060325	0.013126	0.177002	-0.017091	-0.40054
chr2L_9237652_9237982	chr2L_9237652_9237982	3	-0.237601	-0.324764	0.192296	0.085931	-0.067153	0.203973	0.107452	0.135876	0.007795	0.062733	0.05904	0.024065	0.055162	0.020871	0.006368	0.024077	0.179827	0.146354	0.17433	0.154114	0.088077	0.028841	0.118708	0.336997	0.198835	0.175835	0.114444	0.04757	0.148931	-0.023689	0.003235	-0.257468	-0.094111	-0.034121	-0.231034	-0.352558	0.013448	-0.09005	-0.159734	-0.00923	0.008925	0.079983	-0.027304	0.032664	0.225412	-0.006693	0.181746
chr2L_9448512_9448735	chr2L_9448512_9448735	3	-0.517147	-0.232592	0.024592	-0.263411	-0.179377	0.131531	0.112896	0.299842	0.138746	0.044843	0.049077	-0.048043	0.030697	-0.047162	0.150006	-0.005796	0.021206	0.161072	0.07059	0.070696	0.119647	0.076211	-0.06229	0.311694	0.119215	0.079934	0.109717	0.043927	0.102727	-0.024352	0.085937	0.0712	-0.186443	-0.140704	-0.158084	-0.212047	-0.016053	-0.086054	-0.099558	0.054114	0.052257	-0.020407	-0.018365	-0.052875	-0.277316	-0.37393	-0.396716
chr2L_9449687_9449908	chr2L_9449687_9449908	3	-0.058362	-0.013747	-0.030779	-0.090295	0.022002	-0.057009	-0.015642	0.030256	-0.000438	-0.052131	0.039808	0.036672	-0.041221	0.017089	0.128353	0.000931	0.006394	0.092025	0.102136	-0.018606	-0.008649	0.015643	-0.008202	0.178597	-0.029072	0.095296	0.070354	0.05734	-0.025118	0.041125	-0.024019	-0.129925	-0.107255	0.035481	0.048827	0.030506	0.018206	0.021128	0.032157	0.007435	-0.022515	0.092167	0.050821	-0.03394	0.153788	0.110031	0.306949
chr2L_9781940_9782629	chr2L_9781940_9782629	3	-0.186044	0.072228	0.086293	0.190819	0.101274	0.190177	0.280738	0.139521	0.12787	0.064651	0.096461	0.064804	0.112144	-0.000937	0.059552	0.214202	0.178964	0.112608	0.160814	0.212446	0.160585	0.165581	0.267838	0.074583	0.237685	0.136883	0.114484	0.066336	0.088321	0.0903	0.060131	-0.015385	0.037778	0.005398	0.019385	-0.023172	-0.000156	-0.025185	-0.001218	0.141673	0.030391	0.006998	0.025823	0.084827	0.106658	0.021958	1.77218
chr2R_10195458_10195809	chr2R_10195458_10195809	3	-0.072176	0.572742	0.064073	-0.063537	-0.094101	-0.016685	0.029578	0.003952	-0.146212	-0.054747	0.025692	-0.028435	-0.019735	0.096323	0.275747	-0.03518	-0.045523	0.012628	0.022253	-0.026099	0.011878	0.017569	-0.023819	0.14359	0.10874	-0.021626	-0.033936	0.04361	0.136473	0.08269	0.052888	-0.195862	-0.0182	0.120413	-0.077134	0.12145	-0.001728	0.051061	0.103885	0.007846	0.028492	0.367318	-0.041892	-0.03881	0.278154	0.39298	0.080801
chr2R_10210034_10210201	chr2R_10210034_10210201	3	0.011263	-0.013534	0.080318	0.012985	-0.016487	-0.04902	-0.025259	0.070296	0.034416	0.054781	0.127069	0.020299	-0.05916	0.071411	0.048942	0.012376	-0.067764	0.011071	0.019923	-0.013435	-0.010018	0.081421	0.06041	0.185618	0.147303	0.089037	0.127209	0.102054	0.161574	0.042143	0.070912	-0.014147	-0.009192	-0.01222	0.02281	0.002602	0.011827	0.009874	0.004979	-0.021975	0.033508	0.048685	-0.068612	-0.013132	0.023471	-0.026674	0.024375
chr2R_10761326_10761496	chr2R_10761326_10761496	3	-0.021016	-0.150711	-0.092587	0.076704	0.018293	0.148694	0.331773	0.171467	0.228559	0.030797	0.083862	0.178763	0.052745	0.016008	0.039532	-0.064096	0.14064	0.122274	0.148753	0.122753	0.044247	0.194491	-0.054293	0.049946	0.072729	0.050278	0.095518	-0.001895	-0.010393	-0.055717	-0.099845	0.139269	0.004791	-0.005492	-0.059695	0.036063	0.004402	-0.024336	0.017547	-0.046567	-0.029276	-0.046375	0.015724	0.047655	0.008406	-0.072366	0.777352
chr2R_10769425_10769732	chr2R_10769425_10769732	3	-0.099004	-0.088136	0.105053	-0.06221	0.107296	0.024295	0.147566	0.093764	-0.011496	0.01901	0.082102	-0.035189	0.09233	-0.00262	0.070263	0.073967	0.02633	0.078164	0.040847	0.034188	0.009012	0.085508	0.32952	0.067128	0.059659	0.089579	0.130035	0.004767	0.017414	0.06174	0.038416	0.099834	0.074614	-0.028093	-0.0101	0.128955	0.011734	-0.000144	0.069174	0.001576	0.030975	0.019403	0.042633	0.046322	-0.068591	-0.180048	0.789189
chr2R_10852019_10852492	chr2R_10852019_10852492	3	0.242205	0.025183	0.146313	0.064151	-0.132661	0.070693	0.059108	0.076847	0.0249	0.014522	0.082709	0.127879	0.0345	0.017725	0.005674	0.086601	0.045829	0.028301	0.010566	0.090439	0.019799	0.196172	0.071575	0.350343	0.077723	0.17579	0.079555	0.017978	0.051904	0.003544	0.029439	0.130543	-0.010777	0.109719	0.203478	0.131602	0.02101	0.031354	0.067823	0.003567	0.05158	0.069382	-0.025403	0.002915	0.121176	0.134205	-0.07115
chr2R_11017161_11017587	chr2R_11017161_11017587	3	-0.079616	0.066692	0.239667	0.225988	0.218411	0.065442	0.126344	0.131875	0.083409	0.107046	0.066165	0.05417	0.032439	0.030511	0.119221	0.105409	0.123124	0.059651	0.086768	0.224222	0.152675	0.132478	0.108012	0.330268	0.065554	0.238092	0.079103	0.089471	0.098329	0.139946	0.096551	-0.056528	-0.005158	0.102269	0.157741	0.122226	0.042156	0.023284	0.020642	0.088994	-0.019887	-0.00302	0.031848	0.030926	0.206722	0.093309	0.201427
chr2R_11022689_11023243	chr2R_11022689_11023243	3	0.012233	-0.033917	0.174708	0.04855	0.025144	0.062243	0.078865	0.12095	0.07924	0.100493	0.128229	0.049742	0.07339	0.135232	0.130018	0.049596	0.205527	0.186773	0.142404	0.257952	0.195856	0.266703	0.028767	0.255212	0.126379	0.336814	0.20906	0.109212	0.09292	0.114959	0.057254	-0.044135	-0.033981	0.023856	0.042176	0.071953	0.013046	0.001168	0.060964	0.046543	0.046457	0.074967	0.041002	0.100651	0.041063	0.010363	-0.274248
chr2R_11236916_11237296	chr2R_11236916_11237296	3	-0.299665	-0.183162	-0.023466	-0.027232	0.081817	0.030643	-0.012332	0.079008	-0.024489	0.040642	0.034562	0.089778	0.132052	0.191386	0.148398	0.106623	0.096101	0.122756	0.103618	0.107224	0.058404	0.136387	-0.06313	0.260558	0.127079	0.121762	0.128526	0.031117	-0.004801	0.035761	0.001558	-0.041456	-0.018783	-0.157447	-0.067333	0.140482	0.014133	-0.064564	0.051305	0.050606	0.004252	0.071443	-0.065478	0.03107	-0.071673	-0.153279	0.35389
chr2R_11501212_11501417	chr2R_11501212_11501417	3	-0.473446	-0.140185	-0.117109	-0.080268	0.021481	0.016154	0.093451	0.150356	0.053247	-0.052765	0.117691	0.010379	0.04547	0.014116	0.021295	-0.010787	0.121728	0.105999	0.154563	0.015812	0.029514	0.088451	0.026095	0.109554	0.72072	0.286274	0.240915	0.090807	0.312431	0.064411	0.134015	-0.124323	-0.107244	-0.033754	-0.299846	-0.025309	0.005995	-0.021733	0.004889	-0.012562	-0.060596	0.033801	0.069635	0.087533	0.255382	0.119457	0.038648
chr2R_11622764_11623013	chr2R_11622764_11623013	3	0.087826	0.243599	0.083416	0.051158	0.025871	-0.089008	0.054518	0.049464	-0.039606	0.017361	-0.002124	-0.025806	-0.080843	0.009222	0.17894	0.051178	0.061584	0.062775	0.067008	-0.059848	-0.033098	-0.029868	-0.102976	0.258112	-0.005086	0.048608	0.076406	0.081929	0.235364	0.052881	-0.065909	0.007899	-0.08406	0.115595	0.062252	-0.060197	0.024162	0.023698	-0.003644	-0.091479	-0.052089	0.037198	-0.03319	-0.007044	0.279287	0.380957	1.0671
chr2R_11704484_11704699	chr2R_11704484_11704699	3	-0.352961	0.052997	0.028963	-0.008949	0.069294	0.022312	0.308443	0.165089	0.045627	0.035903	0.081501	0.006521	0.249478	0.201296	0.036427	0.029584	0.142062	0.152179	0.218236	-0.076681	0.010001	0.009509	-0.088168	0.134989	0.156705	0.169994	0.143214	0.081603	0.094788	0.065411	0.05242	-0.12173	-0.157012	0.043132	-0.160925	-0.150436	0.014158	-0.007983	-0.038359	-0.081236	0.027675	-0.028702	-0.09255	0.094599	0.288328	0.155983	1.42826
chr2R_11750194_11750788	chr2R_11750194_11750788	3	-0.210123	-0.055043	0.047748	0.033417	0.120341	0.152303	0.394384	0.34691	0.208816	0.149802	0.108349	0.081152	0.123132	0.08771	0.088337	0.151172	0.299377	0.219006	0.232141	0.340036	0.162166	0.120598	-0.082305	0.289175	0.185453	0.224123	0.160481	0.06231	0.065487	0.051449	0.022655	0.033855	-0.045286	-0.012099	-0.042154	0.190289	0.002978	0.001944	0.073205	0.006509	-0.000155	0.00255	0.084095	0.105658	0.212862	0.197236	1.00537
chr2R_11782823_11783178	chr2R_11782823_11783178	3	0.066535	-0.204416	0.401644	-0.000792	-0.113345	0.26046	0.085398	0.274969	0.09521	0.175238	-0.005076	-0.01312	0.016541	0.036587	0.203801	0.019112	0.118223	0.174927	0.159562	0.182949	0.243815	0.207554	0.227264	0.495297	0.068069	0.106462	0.056235	0.020661	0.015889	0.030113	0.015601	-0.053555	-0.204996	0.106631	0.173567	-0.206534	0.03775	0.008347	-0.074146	0.062286	-0.018173	0.002999	-0.090775	-0.012704	-0.057405	-0.065091	0.127448
chr2R_11815848_11816044	chr2R_11815848_11816044	3	-0.236533	-0.309041	0.227248	0.158814	0.351891	0.180188	0.209653	0.377577	0.079824	0.156854	0.111639	0.035525	-0.018927	-0.070794	-0.029107	0.040537	0.124899	0.099979	0.218726	-0.052349	-0.021091	0.031032	-0.036251	0.435138	0.074905	0.124277	0.057582	0.021172	-0.051233	-0.032834	-0.02232	0.010711	-0.185436	-0.033621	-0.16649	-0.343176	0.015336	-0.107694	-0.184032	-0.137454	-0.054712	-0.128424	0.05459	-0.039351	-0.040589	-0.426241	0.014561
chr2R_12017423_12018091	chr2R_12017423_12018091	3	-0.159981	-0.026026	0.168206	0.092134	0.155927	0.168289	0.187174	0.260935	0.09396	0.033585	0.148856	0.040676	0.084283	0.022429	0.12501	0.176512	0.125061	0.087496	0.186969	0.104154	0.03419	0.078636	0.02066	0.297324	0.096397	0.172892	0.117652	0.051476	-0.009825	0.04381	0.055034	-0.129807	0.02244	-0.090759	-0.02908	-0.076881	0.024318	-0.034817	-0.050325	0.033691	-0.012857	0.037557	0.032492	0.036792	0.139371	-0.010513	0.376365
chr2R_12074905_12075513	chr2R_12074905_12075513	3	-0.061125	-0.240574	0.064255	0.153792	0.218847	0.239701	0.284717	0.158476	0.200307	0.096785	0.075003	0.172633	0.089187	0.021073	0.121671	0.077649	0.184165	0.080686	0.098149	0.166721	0.140476	0.195501	0.203996	0.148011	0.087787	0.143639	0.099644	0.043875	0.027905	0.036315	-0.01787	0.146415	0.069436	0.010885	0.050561	0.115797	0.005123	0.039016	0.062779	0.087094	0.003472	0.045849	0.031509	-0.010189	0.14322	-0.049474	1.04636
chr2R_12097848_12098112	chr2R_12097848_12098112	3	-0.148413	-0.261493	0.035396	0.069915	-0.006081	0.139231	0.165072	0.141611	0.149966	0.114622	0.095367	0.15171	0.037416	-0.01227	0.06574	0.050681	0.061496	0.064746	0.058629	0.10925	0.069492	0.054283	0.206241	-0.007672	0.034526	0.111318	0.034105	0.047945	-0.030912	-0.050544	-0.06505	0.093021	-0.020566	-0.227498	-0.025368	-0.21662	-0.007469	-0.046626	-0.094545	0.017764	-0.028856	-0.010103	-0.023397	0.022646	-0.083428	-0.279869	1.07723
chr2R_12471364_12471638	chr2R_12471364_12471638	3	-0.415343	-0.034207	-0.076789	-0.064736	0.015579	0.073929	0.089488	0.059631	0.04582	-0.026313	0.199943	0.325342	0.219705	0.379782	0.012104	-0.035864	0.110609	0.27177	0.087866	0.181041	0.108198	0.127658	0.111981	0.073052	0.132782	0.166374	0.23091	0.039658	0.117039	-0.010437	0.073776	-0.039568	0.003025	-0.125086	-0.223926	-0.00996	0.007856	-0.065268	0.031328	0.031384	0.053021	-0.025845	0.006924	0.085684	0.011421	-0.158371	0.023482
chr2R_12578503_12578816	chr2R_12578503_12578816	3	-0.104455	-0.237379	-0.117949	0.004186	-0.034146	0.03089	-0.047251	0.071149	0.10923	0.060037	0.129677	0.189967	0.107198	0.152449	0.143271	0.138024	0.028885	0.230368	0.141084	0.17378	0.093307	0.140051	0.059428	0.121796	0.091731	0.212243	0.111436	0.03507	0.13533	0.015097	-0.04596	0.004091	-0.013754	-0.260102	-0.111869	-0.165733	-0.011862	-0.032242	-0.077817	0.000713	0.043522	0.091081	0.02941	0.002383	0.050412	-0.274151	-0.016668
chr2R_12984820_12985253	chr2R_12984820_12985253	3	-0.022867	0.07957	0.146223	-0.024498	0.082047	-0.013326	-0.01029	0.062381	-0.081803	0.001957	-0.004011	0.091231	0.139535	0.096245	-0.003878	-0.011261	0.071992	-0.010631	0.023391	0.054346	-0.0088	0.102246	0.062908	0.195482	0.005283	0.015405	0.008895	0.015982	0.0111	0.033107	-0.066857	0.109815	0.086203	0.060876	0.157253	0.202301	0.026004	0.10326	0.057475	0.051527	-0.010243	-0.053794	0.045161	0.023997	0.054015	0.129466	0.081997
chr2R_12987576_12987748	chr2R_12987576_12987748	3	0.254899	0.051343	0.255235	-0.011662	-0.09564	0.012108	0.113905	0.041952	-0.056906	-0.019122	0.020211	0.064906	0.097418	0.016323	-0.045342	0.061281	0.019694	0.006345	-0.009007	0.05522	-0.030188	0.080335	-0.036129	0.155439	0.004343	0.018738	-0.031627	-0.051157	-0.033801	0.106203	-0.046996	0.191219	-0.076399	0.216118	0.072884	-0.035369	0.008719	0.050383	0.055461	-0.006524	0.054728	-0.007787	-0.063996	-0.015404	-0.000393	-0.065307	0.007571
chr2R_12990300_12990486	chr2R_12990300_12990486	3	-0.028367	0.144659	0.018198	0.108156	-0.054978	-0.125735	0.051949	0.00395	0.070595	0.024045	-0.014407	-0.032761	-0.055006	-0.009778	0.116136	-0.014376	0.062321	0.046315	0.023088	-0.030022	-0.016173	0.05751	-0.121649	0.181714	-0.002986	0.151877	0.021565	0.035789	-0.023748	0.102283	0.013003	0.076836	-0.093462	0.13581	0.046199	-0.023582	0.020216	-0.012084	-0.010619	-0.076102	-0.023058	0.021065	-0.003365	0.018667	0.16671	0.055156	0.259535
chr2R_13149351_13149519	chr2R_13149351_13149519	3	-0.179511	-0.189371	0.065622	-0.067622	0.088879	-0.033613	0.0052	0.14274	0.054127	-0.029359	0.043731	-0.000552	-0.000768	0.023891	0.001956	0.02926	0.080757	0.193653	0.088736	-0.005319	-0.008057	0.08119	-0.098879	0.254928	0.059202	0.046799	0.039466	0.072481	0.004015	-0.003666	0.028197	-0.009924	-0.071034	-0.153823	-0.024068	-0.042287	0.018695	-0.034063	-0.038544	-0.027403	-0.022609	-0.008843	0.001333	-0.034464	0.018372	-0.021914	-0.44002
chr2R_13152478_13153211	chr2R_13152478_13153211	3	-0.038897	-0.128311	0.22123	0.166492	0.343331	0.246531	0.35907	0.291304	-0.025707	0.115747	0.046225	0.060701	0.025704	-0.002827	0.189701	0.275887	0.0739	0.065411	0.170657	0.144319	0.043847	0.204378	0.337368	0.22093	0.094463	0.2061	0.125639	0.076902	0.052193	0.020712	-0.006745	0.074917	0.086618	-0.198893	-0.043398	0.056878	-0.002023	-0.047267	-0.030029	0.018197	0.053438	-0.001516	-0.091435	0.008207	-0.12281	-0.238226	1.50735
chr2R_13279848_13280263	chr2R_13279848_13280263	3	-0.2682	-0.090211	-0.122563	-0.056454	-0.097239	-0.085744	-0.116002	-0.049914	-0.055022	-0.08791	0.19965	0.084915	0.129151	0.205238	0.801638	0.092969	0.111876	0.159562	0.148997	0.268079	0.147924	0.068708	-0.005209	0.076948	0.161092	0.162362	0.128921	0.199726	0.07996	0.058295	0.018622	-0.095398	-0.099874	-0.108201	-0.046046	-0.049798	-0.01727	-0.080447	-0.007478	0.008701	0.047772	0.00582	0.024833	0.072318	-0.025327	-0.151208	-0.899329
chr2R_13604739_13605082	chr2R_13604739_13605082	3	-0.067609	0.009373	0.175254	-0.049184	0.032095	0.111645	0.20872	0.239988	0.228038	0.114688	0.037661	0.092305	-0.000442	0.004371	0.018535	0.102971	0.047768	0.084237	0.078281	0.106347	0.022318	0.085655	0.196637	0.166742	0.072953	0.08066	0.03378	0.024351	0.005839	0.073245	0.008586	0.120083	-0.058997	-0.098372	0.033512	0.107046	0.015436	-0.045442	0.024374	0.031031	0.032228	-0.01077	-0.041849	0.020739	-0.066993	-0.130122	0.840838
chr2R_13606670_13607180	chr2R_13606670_13607180	3	0.06071	0.337782	0.171384	-0.065553	-0.047583	0.015185	0.073254	0.057077	-0.006421	0.019938	0.063256	0.092735	0.020338	0.019485	0.108058	0.026682	0.116818	0.127744	0.082242	0.074557	0.001122	0.022478	0.11804	0.265609	0.089839	0.066077	0.12745	0.057668	0.013554	0.044532	0.059268	0.078968	-0.052625	0.08889	0.122623	0.153069	0.029003	0.070348	0.089179	0.010177	0.017737	0.159377	0.019271	0.053688	0.26746	0.282964	-0.251976
chr2R_13679975_13680384	chr2R_13679975_13680384	3	0.081789	0.116125	0.071754	0.037343	0.024714	0.075181	0.095226	0.0709	-0.020185	0.046981	0.06889	0.233085	0.308548	0.325942	0.031143	0.046161	0.147033	0.187736	0.039516	0.117608	0.085009	0.016464	0.294076	0.163941	0.09709	0.084042	0.064381	0.048626	0.055415	0.069455	0.040214	0.094339	0.234029	0.153283	-0.034403	0.188022	0.014626	0.039015	0.099127	0.039305	0.012439	0.029022	0.232234	0.092032	0.1527	0.220694	0.132201
chr2R_14058961_14059163	chr2R_14058961_14059163	3	-0.13045	-0.12849	-0.082656	-0.042905	0.179271	0.330703	0.386727	0.164513	0.224385	0.019273	0.061233	0.222786	0.102455	0.017972	0.06011	0.036029	0.164349	0.061173	0.072454	0.104971	-0.005414	0.178491	0.195837	0.060534	0.07943	0.051629	0.09968	0.063752	0.00762	-0.024384	0.080453	0.03277	0.186844	-0.045571	-0.052522	0.139388	0.020342	-0.021435	0.064193	0.034779	0.010585	-0.083377	0.215095	-0.020916	-0.089898	-0.122372	1.31073
chr2R_14176172_14176521	chr2R_14176172_14176521	3	-0.129248	-0.219571	0.213795	0.041873	-0.023208	0.097068	0.064582	0.106884	0.082213	0.075759	0.107826	0.388721	0.194806	0.136973	0.074231	0.070544	0.128723	0.111615	0.137886	0.216388	0.093056	0.178904	0.169942	0.22376	0.093025	0.180514	0.124762	0.052793	0.037648	-0.019321	-0.059237	0.03136	-0.109321	-0.040634	-0.024106	0.126794	0.004515	-0.045744	0.070011	0.025698	-0.017224	0.027074	-0.008261	0.0924	-0.023593	-0.055031	0.224525
chr2R_14192275_14192801	chr2R_14192275_14192801	3	0.124779	0.056312	0.302855	0.259991	0.190624	0.018595	0.002032	0.026713	0.084554	0.058948	0.007621	0.032802	0.046728	0.02919	0.276507	0.064372	0.005523	0.088629	0.043355	0.061249	-0.003871	0.131739	0.058256	0.090398	0.026428	-0.005965	0.055399	0.050295	0.08414	0.002577	0.00994	-0.163633	0.010063	0.108852	0.263749	0.228807	0.039898	0.054868	0.104927	-0.023449	0.042505	0.09091	0.029059	0.011938	0.150476	0.096536	0.522315
chr2R_14230259_14230896	chr2R_14230259_14230896	3	0.045088	-0.019817	0.205742	0.126403	0.012184	0.189404	0.108381	0.165443	0.189362	0.175846	0.255836	0.084671	0.035493	0.054346	0.135294	0.17412	0.044677	0.149233	0.144406	0.223962	0.207184	0.171342	0.089088	0.267544	0.226154	0.143722	0.147245	0.075734	0.260022	0.028068	0.048322	0.041929	0.037962	-0.016715	-0.069723	0.048438	0.010345	0.003675	0.028573	0.100079	0.044856	0.038363	0.009096	0.03707	0.147666	0.026045	-0.174805
chr2R_14288043_14288291	chr2R_14288043_14288291	3	-0.049738	-0.154943	0.174268	-0.004671	0.185231	0.076872	0.100493	0.227291	0.176566	0.149769	0.061463	0.047436	0.110087	0.105333	-0.015254	0.051499	0.026992	0.07483	0.074964	0.011712	-0.009922	0.122546	0.162265	0.149421	0.075653	0.080504	0.01544	0.08052	0.004661	-0.010301	-0.111421	0.11554	0.064264	0.038751	0.013368	0.184502	0.00467	0.060059	0.118241	-0.026746	0.050724	0.064487	-0.081787	0.0316	-0.016171	-0.191263	0.731042
chr2R_14294286_14294469	chr2R_14294286_14294469	3	-0.184881	-0.305496	0.096038	-0.020486	0.217804	0.315406	0.517917	0.278102	0.280175	0.129136	-0.001228	0.010202	-0.000425	-0.01016	0.040299	0.021286	0.097309	0.065037	0.081609	-0.014094	0.115319	0.143096	0.148918	0.137527	-0.006737	0.079193	0.128348	-0.001713	-0.074481	0.021792	-0.057647	0.07692	0.132912	-0.051028	0.022215	-0.007214	0.004976	-0.013871	0.042769	0.075953	-0.030954	-0.015703	-0.093502	0.032364	-0.049617	-0.265882	1.55049
chr2R_14301047_14301237	chr2R_14301047_14301237	3	-0.363411	-0.286352	-0.108346	0.07967	0.057919	0.159699	0.127142	0.120258	0.130202	-0.04962	0.104226	0.110214	0.100743	0.038207	0.204815	0.075348	0.097703	0.219253	0.177374	0.061745	0.095529	0.040013	0.075625	0.104137	0.150727	0.11027	0.134098	0.028836	0.038351	-0.065807	-0.077997	-0.040843	-0.0224	-0.092666	-0.188923	0.0905	-0.004367	-0.067793	0.03745	-0.02518	0.057596	0.012006	-0.000606	0.051047	0.088175	0.06175	0.56977
chr2R_14390874_14391814	chr2R_14390874_14391814	3	0.155133	-0.003742	0.059772	0.034295	0.146415	0.188803	0.505869	0.322025	0.133703	0.016824	0.062951	0.007306	0.169489	0.241372	0.098567	0.09881	0.135989	0.164937	0.15917	0.181192	0.049513	0.088757	0.371173	0.239814	0.140032	0.101708	0.055958	0.049652	0.104589	0.051406	0.066794	0.030946	0.116662	0.067611	0.066005	0.17584	0.020015	0.0522	0.074567	0.062879	0.086663	0.065214	-0.010468	0.02114	0.059503	-0.081518	0.065808
chr2R_14416252_14416618	chr2R_14416252_14416618	3	-0.317891	-0.166741	0.024759	-0.092327	0.009909	0.34166	0.211405	0.205481	0.151055	0.088905	0.084362	0.055327	0.619413	0.694439	0.079754	0.068765	0.177838	0.170087	0.158401	0.342254	0.377246	0.129568	0.241083	0.288639	0.296713	0.321689	0.247731	0.037085	0.179062	0.066815	0.013217	-0.080479	-0.014437	-0.189771	-0.13521	-0.162782	-0.003284	-0.077786	0.005138	0.011703	0.703093	0.785455	0.005079	0.086202	-0.001408	-0.143605	-0.676856
chr2R_14499128_14499484	chr2R_14499128_14499484	3	-0.100171	-0.068934	0.026516	0.005561	0.069187	0.181881	0.293262	0.106631	0.039248	-0.030569	0.269384	0.092284	0.078532	0.070875	0.041036	0.064942	0.084571	0.104654	0.082029	0.073046	0.087225	0.301539	0.183965	0.136857	0.141988	0.073295	0.043667	0.073844	0.125205	0.03728	0.067618	0.061853	-0.022523	0.007366	-0.032125	0.15488	0.019267	0.007772	0.161585	0.018931	0.042885	0.059154	-0.002169	0.065523	0.053224	0.090036	1.00205
chr2R_14540137_14540687	chr2R_14540137_14540687	3	-0.019874	-0.026606	0.139073	0.062918	0.160822	0.034203	0.227329	0.136044	0.087703	-0.004672	0.033563	0.069596	0.028381	0.045674	0.057853	0.263031	0.098006	0.275106	0.121822	-0.009189	-0.003233	0.00444	0.229088	0.142255	0.141999	0.147492	0.066114	0.103468	0.11085	0.141277	0.200477	0.055889	0.043712	0.039112	-0.010478	0.054831	0.020293	0.014391	0.060614	-0.024763	0.07436	0.054885	0.059774	0.074583	0.128699	0.137026	0.70404
chr2R_14542627_14542965	chr2R_14542627_14542965	3	0.185295	-0.184985	0.474224	0.074792	0.195234	0.004174	0.02806	0.076947	0.051217	0.0786	-0.034747	0.037417	-0.056653	-0.064756	0.183656	0.058661	0.190241	0.090617	0.053795	-0.060847	-0.010302	-0.031453	0.027412	0.234281	-0.044743	0.058067	0.042524	-0.040469	-0.079466	0.028143	0.003947	0.100843	0.06215	0.115979	0.236722	-0.067704	0.061578	0.011673	0.015199	-0.0655	-0.00459	-0.020436	-0.01124	0.029148	-0.052291	-0.033808	-0.001028
chr2R_14577411_14577765	chr2R_14577411_14577765	3	-0.48311	-0.184759	0.158243	0.161871	0.169097	0.067507	0.059758	0.068537	0.056672	0.093455	0.243945	0.067052	0.097882	0.012786	0.25396	0.124462	0.093751	0.097761	0.142053	0.248704	0.010536	-0.012135	0.072565	0.185204	0.173904	0.188819	0.112389	0.111433	0.133125	0.038342	0.070594	-0.173167	-0.117898	-0.146255	-0.209139	-0.038678	0.006937	-0.016771	-0.001981	-0.032386	-0.008683	0.048627	0.018523	0.040011	0.283788	0.040554	-0.085291
chr2R_14687920_14688204	chr2R_14687920_14688204	3	-0.240233	-0.114835	0.085684	-0.047016	0.062416	0.137158	0.136566	0.161164	0.037658	0.064266	0.341439	0.054256	0.086638	-0.020849	0.043688	0.119709	0.065143	0.112549	0.058254	0.154166	0.02859	0.221657	0.072567	0.23286	0.077965	0.19063	-0.003909	0.010118	0.055416	0.06133	-0.001502	-0.075697	-0.114767	-0.114133	0.026131	0.013517	0.014499	-0.001191	0.050691	0.015797	-0.033979	-0.072269	-0.025379	-0.057372	0.025928	-0.077723	0.282604
chr2R_14690747_14691116	chr2R_14690747_14691116	3	-0.037126	-0.23738	-0.033669	-0.058478	0.032915	0.087635	0.125787	0.262442	0.070318	0.042982	0.062678	0.04535	0.094296	0.004042	0.18309	0.092858	0.069263	0.124546	0.127332	0.188961	0.093784	0.128584	0.053922	0.278676	0.11711	0.174573	0.092567	0.044231	0.072729	0.032859	0.017466	0.010906	0.049199	0.024314	-0.061901	0.130742	0.003091	-0.000604	0.076691	0.011713	0.037195	0.012006	0.042306	0.029165	0.150925	-0.135669	0.312228
chr2R_14693652_14694164	chr2R_14693652_14694164	3	0.034577	-0.098423	-0.002071	0.006232	-0.011553	0.199637	0.188364	0.216217	0.028579	0.022989	0.095635	0.01639	0.157417	0.105915	0.080883	0.10413	0.058305	0.071716	0.116176	0.206146	0.066458	0.118483	0.038823	0.400044	0.106172	0.180393	0.172796	0.03364	0.060152	0.029324	-0.006855	-0.08825	-0.072045	0.099908	-0.119488	0.026644	0.016037	0.0297	0.04047	-0.00124	0.104774	0.099248	0.027332	0.143017	0.274743	0.155714	-0.470087
chr2R_15041775_15042017	chr2R_15041775_15042017	3	0.022587	-0.123619	0.093511	0.07972	0.18595	0.072838	0.062171	0.062958	0.031497	0.076395	0.314712	0.047195	-0.025236	0.084984	0.057616	0.166077	0.016969	0.062732	0.045797	0.122218	0.035519	0.185021	-0.029253	0.076375	0.030616	0.077418	-0.020048	0.030055	0.056798	0.006138	-0.044361	-0.057118	-0.05433	0.006976	-0.085498	0.190955	-0.012028	0.018642	0.057793	0.081379	0.055357	0.075471	-0.019774	0.013742	0.043098	-0.202244	0.637209
chr2R_15079269_15079587	chr2R_15079269_15079587	3	-0.072278	-0.050518	0.183767	0.036822	0.14693	-0.043947	0.082615	0.106776	0.013835	0.051814	0.610936	0.182474	0.047753	0.032188	0.130585	0.087319	0.082292	0.101414	0.119556	0.106393	-0.015083	0.086378	-0.154014	0.230859	0.106273	0.185221	0.161963	0.060573	0.117032	0.010399	0.012306	-0.072909	-0.083307	0.080962	-0.047066	0.010159	0.016866	0.009069	0.016817	-0.012353	0.03473	0.021483	-0.069002	-0.000422	0.183082	0.046358	-0.405658
chr2R_15519259_15519606	chr2R_15519259_15519606	3	0.035562	0.013547	0.095781	-0.054165	0.033248	0.019421	0.068656	0.015655	0.032353	0.057437	0.041001	0.026994	0.163207	0.121128	0.07604	-0.012117	-0.000862	0.055214	0.036014	0.074862	0.000545	0.136808	0.020731	0.076527	0.038409	0.027806	0.067861	0.075699	0.057459	0.021925	0.042105	0.013364	0.089274	0.016623	-0.019243	0.181935	0.026275	0.01622	0.076519	0.040176	0.05197	0.05732	0.037463	0.032077	0.034574	0.058032	-0.324898
chr2R_15713758_15714266	chr2R_15713758_15714266	3	-0.045577	0.082541	-0.041612	-0.029284	0.118058	0.073497	0.018624	0.079899	0.071342	-0.055596	0.03999	-0.002994	0.078621	0.126954	0.028647	0.022385	0.02452	0.097187	0.079678	0.000713	0.03511	0.108933	0.202738	0.158865	0.066398	0.105772	0.07927	0.09931	0.06912	0.0413	0.009092	0.062592	-0.011331	-0.030323	-0.06381	0.02333	0.024848	0.002112	0.032867	0.000581	0.00442	-0.000698	-0.065942	0.072314	0.103893	0.038786	0.012211
chr2R_15993862_15994356	chr2R_15993862_15994356	3	-0.086562	0.153229	-0.006959	-0.041007	-0.008804	0.106008	-0.036154	0.093654	-0.081071	-0.015513	0.115127	0.004924	0.018334	0.040187	0.038659	0.057956	0.052017	0.152895	0.083236	0.060975	0.076554	0.122227	0.237285	0.212633	0.246886	0.206852	0.159251	0.156221	0.175757	0.175435	0.202796	-0.054069	0.104521	-0.050905	0.080811	-0.068918	0.002446	-0.035358	-0.035731	0.019	0.03877	0.082774	-0.049332	0.06936	-0.060335	-0.138267	-0.249177
chr2R_16027236_16027393	chr2R_16027236_16027393	3	0.009371	0.157095	0.009496	-0.012094	0.011387	-0.080759	0.127314	0.058176	-0.126724	0.05076	0.063469	-0.010046	-0.000881	0.000457	0.025544	0.037968	0.09148	0.130038	0.060342	0.095233	0.004674	0.070068	-0.037778	0.212645	0.076583	0.208315	0.154178	0.036944	0.159125	0.086916	0.112289	-0.198237	-0.159257	0.066132	0.075561	0.057564	0.022893	0.032835	0.049952	-0.01491	0.107152	-0.023205	-0.133051	0.062839	0.118289	0.164267	-0.212797
chr2R_16048757_16049206	chr2R_16048757_16049206	3	-0.14894	0.111924	-0.028847	0.015411	0.000503	0.140873	0.10597	0.139153	0.082998	0.093132	0.068256	0.023697	0.075505	0.096495	0.104	0.052416	0.084208	0.135066	0.347105	0.085627	0.128997	0.108918	0.006986	0.315429	0.164594	0.139708	0.084822	0.083115	0.183784	0.05202	0.080466	0.053954	0.090423	0.07426	0.009609	0.139416	0.012017	-0.002807	0.04691	-0.017333	0.113753	0.140087	0.005961	0.086849	0.228794	0.082463	0.048793
chr2R_16207539_16208195	chr2R_16207539_16208195	3	0.070754	0.062408	0.050727	0.133222	0.170166	0.007096	0.100951	0.189117	0.222237	0.045409	0.3144	0.364779	0.056205	0.128157	0.160903	0.078488	0.136254	0.101462	0.070425	0.083344	-0.014975	0.241333	0.086106	0.184995	0.068776	0.164631	0.118841	0.049091	0.107896	0.041754	0.029054	0.147036	0.103706	0.135684	-0.012146	0.209198	0.021546	0.050242	0.0718	0.05125	0.048849	0.011083	-0.012124	0.121827	0.130896	0.022078	1.24499
chr2R_1623209_1623811	chr2R_1623209_1623811	3	0.211265	0.562208	0.029962	-0.056919	-0.079884	0.124722	0.169525	0.035296	0.077053	0.027473	0.042645	0.277974	0.122699	-0.039433	0.020223	0.046653	0.063039	0.043839	0.063621	0.161319	0.316614	0.602959	0.239175	0.188446	0.095182	0.106782	0.069011	0.123714	-0.006575	0.238611	0.096304	0.606061	0.109078	0.085885	0.112374	0.31236	0.010609	0.075128	0.261825	0.459251	-0.015954	-0.073318	-0.04725	0.080817	0.110842	0.23014	0.501433
chr2R_1632689_1633198	chr2R_1632689_1633198	3	0.215977	0.546242	0.000131	-0.067597	-0.25407	0.131493	0.05458	-0.053249	-0.102608	-0.078314	0.013235	-0.020872	-0.046263	-0.02327	-0.005741	0.006492	0.120589	0.107477	0.036898	0.026424	0.169476	-0.000798	0.176703	0.047163	0.162361	0.016724	0.054663	0.067644	0.148523	0.282621	0.130246	0.080703	-0.208591	0.231569	-0.106735	0.226064	-0.013268	0.047854	0.106569	0.063161	0.030632	-0.094158	-0.114815	0.088802	0.256916	0.415354	0.391723
chr2R_1660543_1660836	chr2R_1660543_1660836	3	-0.103196	-0.110199	-0.06131	-0.07807	0.105913	0.040686	0.047385	0.081317	0.120234	-0.008953	0.036132	0.060468	-0.00337	0.0223	0.015436	-0.046214	0.075565	0.031875	0.042423	0.029075	0.057657	0.22963	0.056383	0.14839	-0.027891	0.023724	-0.045397	0.006353	-0.036811	-0.028805	-0.026297	0.245339	0.213779	-0.097096	-0.149264	0.12963	-0.001303	0.00245	0.090831	0.144879	-0.010426	-0.009803	0.117078	0.038803	-0.096424	-0.228683	-0.091366
chr2R_1669355_1670540	chr2R_1669355_1670540	3	-0.149235	-0.0467	-0.01948	0.051933	0.037585	0.232593	0.195456	0.14784	0.135145	0.022827	0.286052	0.216903	0.108583	0.023864	0.103227	0.149091	0.127736	0.210893	0.155404	0.148357	0.250686	0.188683	0.13646	0.143884	0.152402	0.20038	0.121418	0.093625	0.128804	0.050084	0.083569	0.09513	0.031783	-0.096905	-0.050298	0.12275	0.011701	0.008427	0.075228	0.223099	0.055777	0.039398	0.063826	0.078019	0.021503	-0.119053	0.739279
chr2R_16885509_16885816	chr2R_16885509_16885816	3	-0.282413	-0.323563	-0.167363	0.014362	0.019392	0.075954	0.155582	0.171397	0.069769	-0.023975	0.135251	0.181009	0.080301	0.004219	0.157067	0.154938	0.080607	0.289904	0.085383	0.253266	0.127242	0.135621	0.188487	0.068605	0.184416	0.229671	0.235246	0.015441	0.252125	0.010087	0.070401	-0.089938	0.022563	-0.12114	-0.098726	0.020032	-0.004563	-0.0274	-0.008447	-0.010041	-0.010756	0.043061	-0.011718	0.006106	-0.025169	-0.177099	0.40805
chr2R_16887652_16887933	chr2R_16887652_16887933	3	-0.373812	-0.139146	-0.170544	0.048803	-0.015293	0.080963	0.151317	0.060685	0.124156	-0.019321	0.149719	0.282624	0.107608	0.063562	0.069886	0.069792	0.174573	0.428316	0.232353	0.260384	0.072555	0.126313	-0.005139	0.025879	0.337125	0.197961	0.213358	0.100127	0.241971	0.067214	0.093906	-0.046183	-0.087073	0.010634	-0.086294	0.162269	0.000912	0.0116	0.108959	0.010125	-0.01478	0.023034	0.135838	0.053268	0.068048	-0.048438	0.226217
chr2R_16963318_16963768	chr2R_16963318_16963768	3	-0.222057	-0.216785	0.020596	-0.083777	0.011728	0.10805	0.114142	0.194665	0.106688	0.101822	0.125538	0.06232	0.051245	0.046884	0.235064	0.143332	0.190545	0.216087	0.094758	0.097308	0.095613	0.177375	0.168384	0.253883	0.17015	0.224804	0.082597	0.047104	0.025748	-0.006371	-0.039804	-0.040481	-0.050286	-0.177198	-0.015399	-0.01794	0.000995	-0.071616	-0.024338	0.053227	0.010756	0.014508	-0.032075	0.017885	-0.036389	-0.051038	0.084819
chr2R_16964227_16964561	chr2R_16964227_16964561	3	-0.284465	-0.233897	0.016695	0.064641	0.103511	0.133452	0.201056	0.150533	0.032209	-0.017575	0.096164	-0.006562	0.102124	0.059958	0.128354	0.07734	0.086026	0.141871	0.053364	0.128209	0.085346	0.102948	0.333583	0.049047	0.013291	0.252376	0.151281	0.022056	-0.031891	-0.016951	-0.042407	-0.005813	-0.193752	-0.107503	0.014214	-0.013864	-0.000511	-0.064651	-0.007245	0.055347	0.060501	0.081124	0.059763	0.055694	-0.089475	-0.089217	0.790966
chr2R_17066375_17066756	chr2R_17066375_17066756	3	-0.041728	0.418964	0.077719	-0.10734	-0.205757	-0.014688	0.044342	-0.014985	-0.053616	-0.025974	0.081144	0.011824	0.062429	0.106521	0.0314	0.032818	0.082596	0.041843	0.046184	0.07676	0.043792	0.078094	-0.031706	0.174318	0.20863	0.054236	0.093258	-0.018142	0.000997	0.02399	0.021523	0.190209	-0.071982	0.093576	0.00514	0.190714	0.038424	0.022303	0.08267	-0.04427	0.034904	-0.001677	-0.034205	0.070921	0.309729	0.513731	0.13
chr2R_17090134_17090458	chr2R_17090134_17090458	3	-0.042346	-0.0624	0.252003	0.084491	0.153595	0.092116	0.093039	0.139893	0.121331	0.107074	0.027109	0.049023	0.025959	0.013903	0.097275	0.122902	0.052017	0.074944	0.06436	0.129395	0.147399	0.125137	0.012295	0.240734	0.051663	0.08687	0.114937	0.052504	-0.006965	0.064786	0.069163	-0.01535	-0.009492	-0.006316	0.022552	0.118673	0.0302	-0.01615	0.085938	0.007877	0.069286	0.019015	0.045131	0.026163	0.135465	-0.08237	0.748175
chr2R_17384325_17385282	chr2R_17384325_17385282	3	-0.081436	-0.152963	0.024712	0.031684	0.068754	0.315312	0.475099	0.297356	0.073424	0.033944	0.16748	0.038686	0.098553	0.020207	0.243148	0.116091	0.128738	0.185887	0.181658	0.100405	0.151769	0.267166	0.200475	0.06159	0.186788	0.193642	0.147486	0.062695	0.0913	0.057965	0.052774	0.04728	0.10759	-0.073002	-0.108964	0.102367	0.006894	-0.036428	0.023504	0.117522	0.02883	-0.004686	0.134167	0.02718	0.038755	-0.108754	1.16603
chr2R_17533189_17534739	chr2R_17533189_17534739	3	-0.087853	0.066514	0.089645	0.326867	0.308547	0.25131	0.374079	0.295154	0.117938	0.027272	0.272648	0.198401	0.102897	0.055362	0.289118	0.139897	0.164848	0.169842	0.257618	0.260021	0.135515	0.162088	0.197038	0.22177	0.209063	0.164079	0.146757	0.099336	0.160093	0.040957	0.104553	0.07176	0.063713	0.017133	-0.074028	0.113475	0.019091	-0.000908	0.076234	0.062611	0.024843	0.048583	0.174458	0.13631	0.058928	0.061578	1.43461
chr2R_17591952_17592470	chr2R_17591952_17592470	3	0.062631	-0.121041	0.073824	-0.036802	-0.020288	0.09735	0.103633	0.191197	0.161486	0.140062	0.104394	0.136286	0.043324	0.056734	0.189075	0.07575	0.164332	0.151529	0.203298	0.066103	0.083159	0.218188	0.082152	0.387185	0.050535	0.271114	0.273305	0.070707	0.052444	0.020297	-0.001659	0.018136	-0.016501	0.036687	0.03368	0.194014	0.025663	0.031435	0.16431	0.01292	0.040596	0.060773	0.007984	0.142879	0.103834	0.127758	0.024212
chr2R_17593441_17593793	chr2R_17593441_17593793	3	0.000276	0.072363	0.199449	-0.057521	0.019642	0.144256	0.011949	0.175759	0.070238	0.115583	0.177777	0.059876	0.060292	0.052518	0.445931	0.063912	0.227607	0.299089	0.158012	0.303664	0.272218	0.297297	0.31536	0.254904	0.189085	0.233127	0.195845	0.140992	0.166661	0.074254	0.090449	-0.14184	-0.040265	-0.011507	-0.047719	0.037482	0.021032	0.001015	0.147841	0.09568	0.054996	0.094832	0.008883	0.08748	0.015418	-0.026977	-0.355162
chr2R_17926926_17927324	chr2R_17926926_17927324	3	0.097911	0.008798	-0.149885	0.000151	-0.026979	-0.081879	-0.025209	-0.029056	-0.005265	-0.051837	-0.030725	-0.017411	0.005088	-0.025858	0.038987	0.036132	-0.049718	0.055654	0.031948	0.013475	-0.119969	0.073465	-0.035104	0.031058	-0.000301	0.040188	0.021221	0.003018	-0.037054	0.029219	0.001582	-0.069114	-0.104995	0.005765	0.094793	0.043926	0.005828	0.001007	0.022873	-0.023117	0.034422	0.014789	-0.053254	-0.015081	0.096313	0.071489	-0.310847
chr2R_18003749_18004496	chr2R_18003749_18004496	3	-0.073251	-0.0702	0.181633	0.143837	0.166509	0.136705	0.143032	0.151249	0.098537	0.107665	0.085176	0.04195	0.086717	0.039128	0.086634	0.104417	0.124217	0.08177	0.095653	0.18277	0.199939	0.194831	0.163424	0.184588	0.136758	0.121577	0.066165	0.057004	0.019203	0.026533	0.024507	0.173325	0.208501	0.023997	0.08474	0.252905	0.016107	0.004501	0.079823	0.045313	0.045591	0.006094	0.090088	0.070661	0.125818	-0.02259	1.55895
chr2R_18024256_18024656	chr2R_18024256_18024656	3	-0.345226	-0.225896	-0.123907	-0.123451	0.001793	0.117785	0.045452	0.044093	-0.033662	-0.103647	0.158633	0.329713	0.144757	0.030712	0.051544	0.068979	0.012117	0.15015	0.193197	0.189088	0.092826	0.346513	0.320878	0.178204	0.143934	0.228769	0.132843	0.011059	0.120836	0.035887	-0.006682	0.165904	-0.003741	-0.242796	-0.068934	0.071805	0.008103	-0.056435	0.015394	0.043413	0.059115	-0.025758	0.022602	-0.020511	0.011876	-0.147459	-0.05362
chr2R_18158084_18158495	chr2R_18158084_18158495	3	0.029052	0.744739	0.026729	-0.043259	-0.053883	0.0537	-0.001721	-0.018239	-0.025369	-0.041764	0.061544	0.02948	0.029703	0.050306	0.048305	0.078468	0.054518	0.059232	0.137696	0.074862	0.09513	0.162547	0.202986	0.340286	0.403453	0.219203	0.175759	0.144813	0.374011	0.27674	0.359296	-0.129709	-0.014183	0.054696	0.098881	0.126323	0.015121	0.024044	0.14393	-0.00071	-0.00994	0.067863	0.01479	0.076225	0.334794	0.341043	0.030888
chr2R_18198821_18198965	chr2R_18198821_18198965	3	-0.226631	-0.052338	0.011863	-0.100457	-0.170474	-0.013896	0.232316	0.128998	-0.085282	-0.025591	0.003829	-0.048813	-0.036482	-0.051547	0.062718	-0.022994	0.081079	0.043098	0.029041	0.183515	0.003184	-0.08518	-0.209807	0.288464	0.083275	0.017224	-0.002121	-0.057366	0.041359	-0.003383	-0.037179	-0.094993	-0.170892	0.133618	0.004623	-0.124431	-0.017129	0.031646	-0.011975	-0.053274	-0.022837	-0.029075	-0.199815	-0.041704	0.221289	0.157146	0.726475
chr2R_18260709_18260928	chr2R_18260709_18260928	3	-0.205694	0.105354	0.010829	-0.089165	-0.200672	-0.036556	-0.095449	-0.053261	-0.048249	-0.043502	0.016254	0.04532	0.128154	0.150201	0.087392	-0.026659	0.0187	0.001685	0.040721	0.029276	0.035568	0.062865	0.016108	0.202226	0.126303	0.141823	0.156669	0.0609	0.104529	0.065877	0.055155	0.082742	-0.090328	0.013589	-0.05883	-0.030359	0.000753	-0.02812	-0.018464	0.004615	0.051832	0.007823	-0.032182	0.012031	0.151386	0.100944	-0.267298
chr2R_18457192_18457667	chr2R_18457192_18457667	3	-0.237359	-0.040093	0.060385	-0.039749	0.019122	0.149973	0.044991	0.192483	0.075825	0.050244	0.012658	-0.032245	0.008534	0.027468	0.039863	0.083909	0.033118	0.055342	0.190586	0.048311	0.083128	0.006339	0.037493	0.266907	0.116085	0.088863	0.081889	0.052438	0.09205	0.056678	0.04461	-0.05197	-0.009578	-0.02033	-0.011711	-0.012306	0.027078	0.003248	-0.02256	-0.018222	0.023724	-0.032633	-0.116668	0.038012	0.040777	-0.056754	-0.366112
chr2R_18480406_18480603	chr2R_18480406_18480603	3	-0.251128	-0.076665	0.01373	-0.071959	-0.158775	0.081217	0.075159	0.009563	-0.148602	-0.048725	0.022412	-0.049455	-0.052018	-0.024083	0.037324	0.036292	0.074421	0.054601	0.197416	0.129454	-0.038099	0.08359	0.121746	0.157932	0.104858	0.04587	0.048104	0.064702	0.129326	0.098088	0.136289	-0.120626	-0.201305	-0.192874	-0.158725	-0.08361	0.026494	-0.081719	-0.047047	-0.038931	0.076924	-0.036978	-0.134046	-0.067043	-0.234591	-0.338764	0.311378
chr2R_18573254_18573844	chr2R_18573254_18573844	3	-0.324203	-0.139733	0.004223	-0.051961	-0.095705	0.215005	0.217257	0.201835	0.186913	0.086348	0.096211	0.079786	0.09307	0.020342	0.308479	0.06738	0.171317	0.205473	0.145843	0.066085	0.085883	0.135507	0.117097	0.096987	0.287235	0.365763	0.290453	0.080593	0.233963	0.049092	0.018166	-0.175105	-0.043772	0.030602	0.032083	0.064424	0.012905	-0.0155	0.010939	0.010623	0.005126	0.015062	0.074964	0.093413	0.16317	0.227995	-0.040464
chr2R_18576307_18576657	chr2R_18576307_18576657	3	-0.282351	-0.206562	0.056829	0.226661	0.284553	0.248816	0.315314	0.157931	-0.042216	0.074278	0.07127	0.073328	0.061693	0.014005	0.166842	0.125365	0.311337	0.105251	0.148282	0.147933	0.115551	0.123652	0.299715	0.140876	0.129806	0.160019	0.137056	0.023665	0.040051	0.02284	0.003477	0.015202	-0.018691	0.089445	0.007124	-0.081357	0.011676	-0.066439	-0.021869	0.047058	-0.016821	0.029624	0.06839	-0.005677	-0.036677	-0.173109	1.08935
chr2R_18821680_18822014	chr2R_18821680_18822014	3	-0.157648	-0.038584	0.058337	0.018786	-0.074093	0.021751	0.127127	0.098123	0.264979	0.027503	0.093595	0.134619	0.057486	0.04957	0.059456	0.049397	0.09887	0.154875	0.031413	0.002011	-0.016727	0.121292	0.095198	0.096942	0.092446	0.122862	0.072473	0.056564	0.006085	0.017929	0.004796	0.145854	0.108434	-0.028619	-0.054517	0.085261	0.012331	0.029541	0.052089	-0.03854	0.02456	0.041141	0.078298	0.136682	0.047653	-0.055344	0.511216
chr2R_19468134_19468554	chr2R_19468134_19468554	3	-0.018839	0.057084	0.131454	-0.010006	0.03891	0.13943	0.039115	0.055941	0.007266	0.021885	0.093414	0.069362	0.217223	0.301751	-0.026318	0.056094	0.116096	0.075826	0.111044	0.199934	0.160231	0.115197	0.060206	0.235994	0.347079	0.253157	0.256118	0.049272	0.152842	0.12318	0.133391	-0.048932	-0.067297	-0.064716	-0.073148	0.116545	0.020934	0.00953	0.050152	0.066887	0.15147	0.436064	-0.02086	0.040262	0.167595	0.094414	0.000491
chr2R_19546560_19547085	chr2R_19546560_19547085	3	0.080387	0.113816	0.042264	0.259412	0.194904	0.000472	0.186571	0.164436	0.073938	0.007187	0.103681	0.044489	0.062568	0.037805	0.100174	0.085254	0.212927	0.132065	0.188304	0.03079	-0.001138	0.140114	0.123542	0.090115	0.164206	0.226899	0.128489	0.087346	0.109037	0.051765	0.044557	-0.026564	0.131337	0.091098	0.033659	0.185938	0.001758	0.02903	0.127508	-0.02229	0.142038	0.062187	-0.014238	0.014639	0.406652	0.19342	0.600434
chr2R_19554326_19554713	chr2R_19554326_19554713	3	0.060481	0.024706	0.140856	0.249661	0.345656	-0.018673	0.002758	0.010135	0.017431	-0.026978	0.067828	0.017584	-0.003449	0.014392	0.038321	0.169474	0.026933	0.002279	0.075605	-0.00265	0.060665	0.123054	0.039725	0.237187	0.067732	0.058003	0.056015	0.027605	0.011614	0.002242	-0.035336	-0.056222	0.09563	-0.050567	0.076422	0.064751	0.023072	0.022206	0.06481	0.003923	-0.046106	0.009924	0.050356	0.000301	0.15894	0.006595	0.128232
chr2R_19865835_19866443	chr2R_19865835_19866443	3	-0.181904	-0.138032	-0.035463	-0.034618	0.069517	0.055792	0.177371	0.264481	0.140684	0.020482	0.222148	0.349512	0.151263	0.073635	0.500094	0.197305	0.164848	0.274939	0.21408	0.235281	0.100529	0.081295	0.107119	0.047141	0.184772	0.20973	0.238298	0.128237	0.193115	0.005898	0.054059	0.061891	0.060462	-0.140009	-0.133029	0.133165	0.003539	-0.062437	0.072615	0.032423	0.073865	0.051644	0.236008	0.064796	-0.011613	-0.195065	1.12477
chr2R_2007930_2008254	chr2R_2007930_2008254	3	-0.383914	-0.187378	0.021588	-0.019725	0.201341	-0.029483	0.062736	0.229965	0.034717	0.043424	0.134417	0.02685	0.095398	0.024589	0.038664	0.084422	0.233706	0.168421	0.200665	0.095774	-0.049173	0.100152	0.049945	0.280888	0.36109	0.312869	0.26065	0.087716	0.239851	0.001884	0.048513	-0.048008	-0.019558	-0.066241	0.008077	0.136136	-0.000804	-0.000219	0.038682	-0.086456	0.062412	0.041562	0.099419	0.091946	0.096527	-0.033055	-0.393533
chr2R_20181485_20181688	chr2R_20181485_20181688	3	-0.446819	-0.065075	-0.072156	-0.090051	0.012338	0.132278	0.003396	0.002636	-0.051573	-0.068236	0.012663	0.044598	0.221199	0.197354	-0.044114	-0.03704	0.044854	0.104356	0.050351	0.010181	0.054677	0.041145	0.257264	0.256122	0.129083	-0.008426	0.041859	0.049688	0.069232	-0.003934	0.077767	-0.192299	0.064246	-0.106677	-0.080813	-0.112109	0.007702	-0.001218	-0.098247	-0.034982	0.216711	0.17822	-0.120793	-0.001074	0.008808	0.08731	-0.280148
chr2R_2019351_2019783	chr2R_2019351_2019783	3	-0.223946	-0.205268	0.132321	0.15863	-0.064937	0.467713	0.234601	0.088388	0.023677	0.053279	0.077879	0.134045	0.14938	0.010881	0.159472	0.115293	0.198605	0.196471	0.235495	0.141796	0.197614	0.145222	0.39697	0.058934	0.312856	0.133076	0.095861	0.069911	0.143862	0.033205	0.162365	-0.081255	-0.068146	-0.063442	-0.045911	-0.001979	0.013236	-0.064321	-0.047973	-0.013482	-0.035067	0.035031	-0.044012	0.057477	0.04357	0.004058	0.786945
chr2R_2026197_2026385	chr2R_2026197_2026385	3	-0.211539	-0.168424	0.084116	0.020507	-0.062252	0.18931	0.098189	0.274485	0.240146	0.172862	0.125369	0.046378	0.009098	-0.006424	0.049712	0.083904	0.084599	0.09335	0.143752	0.11419	0.191049	0.216641	-0.107229	0.193619	0.133143	0.348765	0.190428	0.037418	0.040502	-0.002015	0.001924	-0.039367	-0.049198	-0.179526	-0.09496	-0.152143	-0.016205	-0.08254	-0.045076	0.118286	-0.058439	-0.030346	-0.007315	-0.002291	0.037436	-0.151258	-0.567871
chr2R_20287096_20287499	chr2R_20287096_20287499	3	-0.472903	-0.427158	-0.231242	0.235592	0.226364	0.117082	0.285307	0.268228	0.220286	0.180194	0.082151	0.024905	0.092162	0.012792	0.130821	0.03082	0.433586	0.209439	0.238831	0.144474	0.036583	0.07678	-0.095298	0.234464	0.208174	0.325354	0.251332	0.067318	0.095976	-0.018754	0.086824	-0.054201	0.093843	0.037911	-0.349278	0.191028	0.003749	0.012327	0.058415	0.030449	0.005877	0.023402	0.29518	0.094352	0.248257	0.072853	-0.052671
chr2R_2028853_2029381	chr2R_2028853_2029381	3	-0.261572	-0.191391	0.271285	-0.021709	0.129247	0.207582	0.177174	0.35069	0.178082	0.156863	0.081971	0.054384	0.027987	0.03685	0.135545	0.109413	0.225372	0.206248	0.241781	0.238409	0.123481	0.170486	0.087862	0.371777	0.27711	0.551591	0.389066	0.098263	0.2174	0.059995	0.085627	-0.077036	-0.026797	0.16003	-0.05644	0.145354	0.012536	0.014233	0.077389	0.030468	0.028641	0.028727	0.015267	0.06495	0.2658	0.234734	-0.249032
chr2R_2032897_2033262	chr2R_2032897_2033262	3	-0.078603	-0.228018	-0.061339	-0.096881	0.095475	0.106349	0.108196	0.329974	0.101737	0.090019	0.141067	-0.003986	0.008104	0.031464	0.075247	0.126699	0.095783	0.094703	0.159664	0.182256	0.077115	0.190558	-0.001935	0.175757	0.142979	0.239396	0.143442	0.082144	0.035055	0.020357	0.023628	-0.059328	-0.118496	-0.14128	0.026264	-0.070065	-0.003691	-0.047625	0.005114	0.013083	0.047567	0.038008	-0.009559	0.048371	0.053293	-0.027403	0.056057
chr2R_20430833_20431352	chr2R_20430833_20431352	3	-0.282731	-0.146521	0.275089	0.346308	0.254522	-0.028722	-0.071819	0.00365	-0.01638	-0.05206	0.020789	0.05584	0.051413	-0.021149	0.038124	0.163846	-0.014496	0.134535	0.140621	-0.037253	-0.045009	0.04344	-0.032282	0.285501	0.064436	0.080066	0.064896	0.009839	0.019318	0.028165	0.08639	-0.194018	-0.058261	-0.029524	0.034947	-0.087853	0.032059	-0.0482	-0.07712	-0.013316	0.046566	0.017467	-0.021467	-0.030494	0.316228	0.151318	-0.194159
chr2R_20439982_20440586	chr2R_20439982_20440586	3	0.249762	0.088284	0.391841	0.676968	0.440851	0.068945	0.245594	0.094911	-0.061471	0.070151	0.001543	-0.034317	0.058854	0.001217	0.03842	0.043274	0.128262	0.100263	0.178123	0.185282	0.076459	0.012922	0.104382	0.30335	0.085716	0.038548	0.021747	0.00908	0.010069	0.021509	0.025396	-0.234198	-0.070894	0.260515	0.22797	-0.089083	0.061381	0.068564	-0.041194	0.01998	0.004746	0.202748	0.053139	0.017069	0.516274	0.219687	-0.081217
chr2R_20518396_20518705	chr2R_20518396_20518705	3	-0.084698	0.338007	-0.045657	-0.128589	-0.043269	0.385091	0.194361	0.123787	0.034899	-0.025308	0.015178	0.057703	-0.026053	-0.042558	0.01229	0.043948	0.046757	0.021238	0.121229	0.295397	0.226388	0.006245	0.495852	0.292116	0.164654	0.052076	0.008848	0.074646	0.087205	0.073925	0.129814	0.031924	-0.212204	0.046695	-0.107991	-0.197661	0.012907	0.017412	0.005067	0.11132	0.063915	-0.05158	-0.030931	-0.042348	0.053045	0.059205	-0.019163
chr2R_2055847_2055997	chr2R_2055847_2055997	3	-0.111384	-0.066036	0.149915	-0.089348	-0.169929	0.030122	-0.146996	-0.020649	-0.044855	-0.072681	-0.042274	-0.05011	0.111193	0.077722	0.025944	-0.004997	-0.094665	0.002428	0.019616	-0.198529	0.102209	0.043425	-0.0837	0.280935	-0.070838	-0.009136	-0.029875	0.029947	-0.129396	0.003399	-0.066006	0.000915	-0.25438	0.008403	0.08694	-0.248516	0.007195	-0.071521	-0.147714	-0.087883	-0.051861	-0.03554	-0.129897	-0.041602	-0.103241	-0.316704	-0.088169
chr2R_20655474_20655951	chr2R_20655474_20655951	3	-0.116948	-0.109616	-0.091352	0.010177	0.171349	0.074138	0.255663	0.151645	0.182508	0.052615	0.138502	0.129697	0.11898	0.024946	0.101048	0.088275	0.217	0.137519	0.124539	0.031209	0.078343	0.123825	0.204321	0.129587	0.133457	0.143798	0.085569	0.060105	0.010142	0.04395	-0.038015	0.010346	0.218177	0.063912	-0.03625	0.150353	0.008177	-0.034847	0.063263	-0.011944	-0.012256	0.030709	0.173434	0.069983	0.016911	-0.019153	0.725214
chr2R_20874070_20874745	chr2R_20874070_20874745	3	-0.276206	-0.324846	0.027592	-0.076864	0.018611	0.277699	0.25194	0.280456	0.250988	0.20467	0.05092	0.104558	0.083928	0.027921	-0.02845	0.124292	0.191184	0.18143	0.234208	0.15971	0.237945	0.130732	0.112029	0.449846	0.201862	0.230372	0.190142	0.036398	0.05577	0.025629	-0.013726	0.102271	-0.040748	0.081054	-0.12964	0.195019	0.026056	0.000772	0.089261	0.041554	0.040118	0.06174	-0.040385	0.069608	0.254429	0.099228	0.405123
chr2R_2123232_2123858	chr2R_2123232_2123858	3	-0.069115	0.152572	0.030316	0.165037	0.252525	-0.001223	0.040435	0.085853	0.095325	-0.004993	0.126285	0.094742	-0.008274	-0.005113	0.007831	0.04383	0.279234	0.077898	0.075091	0.029914	0.098585	0.138525	0.046533	0.203458	0.148862	0.039778	0.130343	0.058392	0.074073	0.047257	0.086419	0.067268	0.520423	0.093296	0.033646	0.270592	0.066178	0.080085	0.192594	0.069852	-0.0015	0.029623	0.231832	0.184067	0.254011	0.290464	-0.171519
chr2R_2500450_2500812	chr2R_2500450_2500812	3	-0.01421	-0.122602	0.016052	0.071974	0.030621	0.021385	-0.002824	0.07188	0.113522	0.003057	0.10855	0.228112	0.092951	0.139135	0.058396	0.04204	0.037931	0.086757	0.006141	0.121687	0.114753	0.203995	0.026009	0.198779	0.037471	0.036494	0.036209	-0.026654	-0.01831	0.010749	-0.021033	0.120022	0.017622	-0.138397	0.014277	0.083738	0.020202	-0.02069	0.014114	0.194409	-0.009482	0.019756	-0.056599	0.011799	-0.150895	-0.244543	-0.176862
chr2R_2515766_2515923	chr2R_2515766_2515923	3	-0.23527	-0.066288	-0.045784	0.237175	0.07028	0.164447	0.220278	0.156143	0.198939	0.115419	0.05817	0.018936	-0.000466	-0.028448	-0.006718	0.016078	0.166961	0.062476	0.02448	0.189354	0.095711	0.099465	0.131517	0.141151	0.01227	0.107938	0.010615	0.01396	0.026237	0.056013	0.062119	-0.183501	0.156841	-0.092512	-0.100094	0.095592	0.020716	-0.010313	0.055413	0.098579	-0.007522	-0.017119	0.076767	0.038997	0.198934	0.019703	0.485331
chr2R_2517970_2518158	chr2R_2517970_2518158	3	-0.19375	-0.128623	0.093102	0.147301	0.076353	0.302329	0.322362	0.273327	0.44845	0.168812	0.132091	0.276589	0.096399	0.045744	0.156033	-0.004429	0.117471	0.110594	0.069284	0.19907	0.342892	0.115395	0.021105	0.25919	0.131656	0.13645	0.035031	0.005534	0.05096	-0.039763	0.011271	-0.002075	0.003262	-0.04581	-0.136045	0.207709	0.004287	-0.014215	0.111604	0.045209	-0.031403	-0.003101	-0.065082	0.017257	0.219437	-0.063341	0.905733
chr2R_2766090_2766357	chr2R_2766090_2766357	3	-0.290409	-0.245594	-0.073329	-0.030273	0.027863	0.081556	0.068877	0.217912	0.037068	-0.023219	0.156642	0.218347	0.107303	0.057888	0.048079	0.06098	0.045376	0.119433	0.1431	0.141872	0.080832	0.157971	0.07869	0.167788	0.11584	0.23518	0.068206	0.043495	0.030388	0.017875	0.016128	0.094225	0.11396	-0.262926	-0.046811	-0.119102	0.014239	-0.078861	-0.031436	-0.010344	-0.023871	-0.069047	0.067477	-0.014562	-0.168706	-0.248428	-0.116204
chr2R_3136325_3136855	chr2R_3136325_3136855	3	-0.273374	-0.075152	0.032099	0.002777	-0.009975	0.132992	0.279089	0.201658	0.152935	0.062898	0.052728	0.056807	0.148843	0.029926	0.176387	0.056342	0.093079	0.056793	0.141721	0.188652	0.1112	0.181163	0.150768	0.149561	0.139598	0.138208	0.113022	0.029779	0.048183	0.051426	0.01111	0.141348	-0.056039	-0.128511	-0.052564	0.18441	0.008584	0.029857	0.082248	0.114784	0.034273	0.008407	0.127464	0.038683	0.002631	-0.083874	1.29188
chr2R_3265690_3266272	chr2R_3265690_3266272	3	0.096899	-0.031242	0.594907	0.360014	0.374806	0.167681	0.118688	0.279845	0.147254	0.237568	0.074722	0.017925	-0.01335	0.011177	0.086904	0.135916	0.082503	0.043457	0.100219	0.151127	0.190636	0.195111	0.08735	0.374496	0.022633	0.084747	0.09715	0.099085	-0.016134	0.059905	0.000703	-0.067683	0.026838	0.12561	0.192771	0.194997	0.031662	0.016706	0.114009	0.035691	0.082812	0.038479	-0.031577	0.012905	0.216932	-0.003199	0.189229
chr2R_3269268_3269612	chr2R_3269268_3269612	3	-0.041242	-0.229737	0.06873	0.298497	0.170242	-0.017059	0.185429	0.037532	-0.02633	-0.019692	0.084803	0.051051	0.036321	0.009569	-0.006068	0.131433	0.074766	0.08121	0.102798	0.021105	0.041259	0.176724	-0.012971	0.048284	0.126287	0.102701	0.029441	0.003783	0.06391	0.021775	0.039936	-0.049275	0.210321	0.003396	-0.110706	0.079624	0.012382	-0.015295	0.0256	0.026566	-0.008026	0.053179	0.123581	-0.027221	0.09677	0.067985	1.13147
chr2R_3376093_3376651	chr2R_3376093_3376651	3	-0.205724	-0.124454	-0.04002	0.061082	0.339808	0.263521	0.331193	0.262208	0.193802	0.064099	0.18947	0.197535	0.128762	0.05916	0.440595	0.131798	0.2903	0.162518	0.187654	0.236335	0.128126	0.165526	0.152371	0.043071	0.225055	0.264341	0.211585	0.052258	0.112213	0.009436	0.105036	0.114108	0.146717	-0.064367	-0.148492	0.016438	0.015345	-0.037958	0.040701	0.102867	0.058094	0.021394	0.090114	0.039257	0.084615	-0.096556	1.19687
chr2R_3471899_3472118	chr2R_3471899_3472118	3	0.119842	-0.19819	0.229939	0.421124	0.327022	0.090533	0.042525	0.029055	0.025098	0.036071	-0.003982	0.028589	-0.019643	-0.038703	0.014132	0.102375	0.079166	0.097877	-0.019018	0.122312	0.20521	0.137358	0.270435	0.168938	0.01123	0.089862	0.020134	0.004451	-0.000781	-0.021399	-0.057108	0.008903	0.111416	-0.030318	0.156049	0.166826	0.024181	0.005275	0.041452	0.086661	-0.01967	-0.040014	0.143605	0.061411	0.040218	-0.050979	0.371932
chr2R_3510467_3510812	chr2R_3510467_3510812	3	-0.302019	-0.202408	0.282699	0.01578	0.125234	0.08091	0.199921	0.197083	0.007874	0.079287	-0.003514	0.003788	0.057062	0.022113	0.007784	0.175369	0.15106	0.125947	0.179397	0.057276	0.247422	0.136981	0.160285	0.162564	0.082365	0.126814	0.1884	0.037025	0.02235	0.023436	0.00267	0.010301	-0.032188	0.023003	0.014408	-0.053341	0.014786	-0.032972	0.002475	0.102967	0.058736	0.015243	-0.042821	0.106822	0.199827	0.037586	0.756989
chr2R_3553186_3553375	chr2R_3553186_3553375	3	-0.377917	-0.265347	-0.079318	-0.051337	0.083277	0.129214	0.180758	0.090735	0.048158	-0.075239	0.165899	0.078631	0.047302	-0.058217	0.080047	0.018566	0.038404	0.044646	0.091718	-0.020032	0.037102	0.073065	0.139509	0.047987	0.064513	0.012608	0.056776	0.022409	-0.060523	-0.02063	-0.032677	0.011932	0.071784	-0.224539	-0.085884	0.135055	0.025348	-0.017325	0.039473	0.045592	0.027948	-0.097471	0.081449	-0.06924	-0.124657	-0.233894	1.20836
chr2R_3610145_3610427	chr2R_3610145_3610427	3	-0.092223	0.146215	0.137763	0.081861	0.049116	-0.013519	0.056374	0.043287	0.144232	0.005805	0.21206	0.056133	0.042937	0.042499	0.343193	0.092334	0.039606	0.183723	0.078259	0.026417	0.104494	0.17665	0.042749	0.173681	0.048303	0.080901	0.06797	0.073716	0.079437	0.081581	0.047909	-0.039511	0.036498	0.049957	-0.044661	0.082113	0.015576	0.021751	0.037666	0.01884	-0.000411	0.069645	0.113546	0.10898	0.197607	0.236818	0.424729
chr2R_3632543_3633223	chr2R_3632543_3633223	3	-0.21795	-0.172116	0.12007	0.048006	0.117142	0.199624	0.381729	0.209062	0.090904	0.103667	0.067841	0.046323	0.069096	0.051537	0.034942	0.158973	0.184231	0.217583	0.166154	0.21958	0.122903	0.219131	0.332188	0.261878	0.165872	0.193334	0.113377	0.027421	0.094277	0.016799	0.062723	-0.120134	-0.121366	-0.06445	-0.080827	0.426475	0.011593	-0.041943	0.144343	0.072048	0.001994	-0.032522	-0.02811	0.116285	0.176045	0.112191	1.52645
chr2R_4039580_4039973	chr2R_4039580_4039973	3	-0.038747	-0.087771	0.334759	0.036935	0.309788	0.02713	0.062049	0.085053	-0.02124	0.06184	0.045128	0.145504	0.101401	0.150484	0.021871	0.088656	0.011694	0.095573	0.098223	0.017736	0.079799	0.149428	0.089636	0.32787	0.074863	0.020527	0.024074	0.028556	0.002781	-0.008152	-0.076454	-0.074273	-0.025608	-0.000683	-0.00929	0.043726	0.008679	0.020157	0.018836	0.044016	0.034917	0.003193	-0.029741	0.016161	0.007937	-0.188556	-0.205414
chr2R_4124427_4125482	chr2R_4124427_4125482	3	-0.08755	-0.065151	0.220273	0.12753	0.099847	0.302944	0.32859	0.420963	0.375957	0.174213	0.143531	0.571178	0.287268	0.146778	0.272359	0.067364	0.171072	0.140195	0.140498	0.261813	0.231594	0.261246	0.200047	0.313897	0.221066	0.21573	0.153942	0.050929	0.072196	0.050487	0.048348	0.310277	0.054864	0.147254	-0.017431	0.126029	0.024343	0.019416	0.093065	0.080305	0.021118	0.027723	0.104336	0.063969	0.103469	0.128851	1.34285
chr2R_4214334_4215044	chr2R_4214334_4215044	3	0.079367	0.231398	0.079319	0.101726	0.032732	0.000407	0.039826	0.045193	0.035666	-0.02281	0.058316	0.051007	0.034793	-0.000905	0.066011	0.020685	0.035776	0.04848	0.079686	0.059161	-0.001961	0.089183	0.03705	0.216734	0.332559	0.119304	0.059927	0.089934	0.26188	0.119461	0.198702	-0.006077	0.019628	0.072931	0.05214	0.10162	0.03087	0.023894	0.042061	0.016746	0.04949	0.055302	0.060816	0.067864	0.28185	0.273409	-0.013259
chr2R_4331611_4332313	chr2R_4331611_4332313	3	0.047597	-0.060508	-0.022001	0.031449	0.022472	0.118424	0.322418	0.154081	0.138204	0.077653	0.08024	0.039663	0.126501	0.085586	0.138607	0.076387	0.082017	0.140527	0.125389	0.119638	0.040442	0.274179	0.142179	0.053237	0.142605	0.191795	0.14745	0.063929	0.031702	0.011055	0.016385	0.070326	0.087402	-0.021571	-0.099956	0.18013	0.004806	-0.015997	0.051397	0.029669	0.036125	-0.000744	0.041042	0.015086	0.051237	-0.056575	0.444803
chr2R_4519930_4520275	chr2R_4519930_4520275	3	-0.021418	0.21315	0.072315	0.055812	0.045169	0.083927	0.073452	0.069228	-0.017497	-0.003071	0.141461	0.173631	0.194751	0.179972	0.073137	0.093457	-0.001432	0.072983	0.079792	0.097284	0.050048	0.160773	0.09706	0.218535	0.353959	0.317568	0.336946	0.095242	0.218967	0.275895	0.242383	-0.052234	-0.00227	0.044973	0.037101	0.205284	0.040044	0.084937	0.100322	0.046682	0.001363	-0.012622	0.049753	0.072182	0.175443	0.204488	-0.003078
chr2R_4532513_4532858	chr2R_4532513_4532858	3	-0.289288	0.360696	0.195486	-0.080861	-0.009857	0.054609	0.059189	0.144689	0.008509	0.08496	0.068145	0.033555	0.045422	0.02629	0.221946	0.101593	0.129319	0.143002	0.120679	0.030023	0.157244	0.005893	0.035593	0.353159	0.217067	0.168965	0.084922	0.097539	0.199368	0.142643	0.068312	-0.05789	-0.028323	0.079022	0.004409	0.094249	0.020042	0.030814	0.028039	0.025602	0.027555	0.035943	-0.04445	0.06471	0.30128	0.201772	-0.022457
chr2R_4535093_4535636	chr2R_4535093_4535636	3	0.06235	0.32149	0.372366	-0.040181	0.146655	0.071214	-0.014159	0.237324	0.054471	0.191809	0.018466	5.7e-05	0.034336	0.025955	0.031907	0.13883	0.064048	0.086277	0.087933	0.033539	0.057657	0.172661	-0.005183	0.532798	0.146284	0.219894	0.245313	0.07598	0.097533	0.172098	0.092891	-0.061722	-0.08833	0.135601	0.160331	0.291992	0.06461	0.07659	0.118902	0.012767	0.043853	0.264619	-0.056282	0.043685	0.102451	0.146091	0.141504
chr2R_4536757_4537346	chr2R_4536757_4537346	3	-0.043047	0.016201	0.048642	0.170904	0.071579	0.263856	0.374635	0.171984	0.116853	0.040815	0.098283	0.092646	0.109323	0.035311	0.30422	0.106752	0.12719	0.127669	0.131166	0.219795	0.11735	0.161709	0.204844	0.043544	0.265276	0.482577	0.471427	0.107084	0.153132	0.098894	0.16375	0.006838	0.003128	-0.048545	-0.046839	0.131188	0.013294	0.01011	0.033756	0.070916	-0.028258	0.022345	0.074865	0.103316	0.066649	0.044475	1.41366
chr2R_4541094_4541540	chr2R_4541094_4541540	3	-0.189987	-0.088306	0.338027	0.134886	0.426207	0.367988	0.209132	0.331921	0.170066	0.149009	0.290471	0.063643	0.060896	-0.023369	0.32939	0.140965	0.125041	0.172959	0.216427	0.29868	0.3081	0.144311	0.070301	0.455714	0.275212	0.143451	0.136053	0.080332	0.193043	0.115489	0.08781	-0.06884	0.012028	0.052494	0.064891	-0.073188	0.02244	-0.022732	-0.052164	0.094466	-0.002814	-0.012829	0.014276	0.033875	0.113906	-0.013627	0.03617
chr2R_4553336_4553846	chr2R_4553336_4553846	3	-0.136025	-0.22422	0.000119	0.180282	0.184275	0.438154	0.497381	0.294162	0.216288	0.077342	0.359414	0.510004	0.563638	0.527755	0.044656	0.132434	0.094639	0.170981	0.050722	0.177553	0.186284	0.082078	0.216061	0.006381	0.068927	0.178382	0.100602	0.03152	0.036904	-0.031632	-0.095143	0.091937	0.025234	-0.109333	-0.059823	-0.025407	-0.00052	-0.034342	-0.033639	0.017091	0.002864	-0.0369	0.087169	0.027225	-0.067424	-0.117779	1.80636
chr2R_4555134_4555300	chr2R_4555134_4555300	3	-0.068109	-0.152381	0.36579	0.400115	0.418813	0.134073	0.244492	0.19076	0.061694	0.139787	-0.003474	-0.000839	0.048775	0.052773	0.049119	0.202915	0.111326	0.063288	0.066646	-0.007333	-0.025267	0.120616	0.017225	0.202909	0.008649	0.034179	0.055035	-0.00108	0.042252	0.044395	-0.019769	0.041639	0.021077	0.07452	-0.030754	0.070102	0.011361	-0.020376	0.042255	0.059889	0.011255	-0.045051	-0.001561	0.033277	0.112102	-0.059552	0.98891
chr2R_5162458_5162679	chr2R_5162458_5162679	3	-0.071362	-0.220881	0.279164	0.244762	0.227101	-0.002522	-0.056963	0.023084	0.010715	0.070676	0.064598	0.018865	-0.026833	-0.030306	0.092839	0.094206	0.038784	0.043927	0.099136	-0.092112	-0.015473	0.148031	0.124891	0.283067	-0.03258	0.080399	0.002154	0.033378	-0.088244	0.035426	-0.0221	-0.205861	-0.110227	-0.060737	0.069503	-0.084679	0.016463	0.004929	-0.054179	4e-06	-0.022994	-0.00157	0.054899	0.039026	0.119547	-0.075892	0.139267
chr2R_5748087_5748427	chr2R_5748087_5748427	3	-0.057488	-0.115622	0.291604	-0.115255	0.021245	0.000124	0.185178	0.103291	0.051516	0.089155	0.076842	0.027858	0.069247	0.038446	0.453495	-0.024836	0.174733	0.197766	0.093603	0.294068	0.100975	0.083491	0.048226	0.302692	0.143113	0.061714	0.036879	0.009187	0.107085	-0.012922	0.039451	0.0639	-0.030689	0.100279	-0.065463	0.096279	0.02826	0.016506	0.119934	0.130385	0.014704	-0.040019	0.014021	0.054523	0.278071	0.12536	0.53266
chr2R_5749295_5749692	chr2R_5749295_5749692	3	-0.077321	-0.282317	0.256662	-0.016022	0.188833	0.086068	0.09603	0.267293	0.152675	0.18265	0.270771	0.104311	0.046966	0.042242	0.083737	0.077517	0.122921	0.05257	0.181923	0.096616	0.056364	0.146565	-0.042126	0.462271	0.098561	0.096379	0.079249	0.0258	0.025774	-0.005807	-0.036471	0.038907	-0.007775	0.116644	-0.051707	0.135203	0.022627	0.017242	0.042782	0.033755	0.061215	0.039462	-0.032559	0.023457	0.179582	0.074384	-0.048504
chr2R_5817063_5817639	chr2R_5817063_5817639	3	0.027004	-0.083233	0.288185	0.10223	-0.033997	0.207529	0.046795	0.099848	0.071355	0.050346	0.056292	0.090527	0.053062	0.015933	0.068714	0.124579	0.055213	0.210774	0.101472	0.238841	0.320775	0.111915	0.107514	0.308497	0.120639	0.152961	0.09004	0.031999	0.16846	0.032149	0.055675	-0.109725	0.069818	0.039539	0.056454	-0.105758	0.020875	0.009697	-0.038426	0.129665	0.031814	0.178846	0.008463	0.063821	0.112063	0.176214	0.021949
chr2R_5842494_5843156	chr2R_5842494_5843156	3	-0.117814	-0.060928	0.23427	0.150631	0.263548	0.148872	0.026222	0.16797	0.093607	0.060305	0.104844	0.170907	0.050531	0.022904	0.006691	0.208676	0.026346	0.107731	0.153259	0.074996	0.091447	0.078091	0.117903	0.292007	0.186166	0.139185	0.144512	0.072698	0.138397	0.040872	0.001663	0.031934	0.017203	0.048214	0.070648	0.097624	0.027371	0.021855	0.038149	0.01874	0.016553	0.072545	-0.01521	0.095121	0.077122	-0.153523	-0.11399
chr2R_5944149_5944369	chr2R_5944149_5944369	3	-0.123906	0.5532	0.14502	-0.155547	-0.187899	-0.00802	0.032629	-0.026963	-0.051896	0.012323	-0.003587	0.004644	0.00427	-0.0583	0.165465	-0.07225	0.022354	0.012257	0.08393	0.060311	0.0598	-0.084652	0.012792	0.138321	0.058865	-0.012407	-0.020734	0.047511	0.076331	0.044574	0.057569	0.059798	-0.127172	0.114631	-0.155344	-0.108863	0.031816	0.046844	0.036042	-0.011348	-0.014421	-0.028581	-0.06755	0.004177	0.352334	0.55779	0.051239
chr2R_5965649_5965984	chr2R_5965649_5965984	3	-0.148623	0.066459	0.073679	0.027587	0.056253	0.04833	0.106751	0.053584	0.030736	0.011745	0.101787	0.124752	0.184773	0.151447	0.155225	0.043216	0.005176	0.082278	0.118826	0.041647	0.04184	0.16977	0.104618	-0.00146	0.06202	0.079597	0.103277	0.084048	0.096163	0.071284	0.029392	0.056561	0.001162	0.040615	0.01825	-0.053191	0.013202	-0.037477	-0.00568	0.02541	0.056853	0.19837	0.005793	0.080196	0.10096	-0.029718	0.577692
chr2R_5988348_5988517	chr2R_5988348_5988517	3	-0.208864	-0.176876	-0.033266	0.12635	0.237831	0.164075	0.187688	0.180564	0.163741	0.063303	0.39345	0.330006	0.168848	0.061123	0.10693	-0.019602	0.105545	0.134277	0.141528	0.02257	0.16025	0.161822	0.105879	0.035358	0.041429	0.095291	0.068184	0.025678	0.005205	0.050636	-0.026612	-0.10594	0.002767	-0.06639	-0.020765	0.06529	0.013882	-0.010175	0.039996	0.13672	-0.006761	-0.00633	0.091784	0.084042	0.077724	0.005957	1.62126
chr2R_5988966_5989379	chr2R_5988966_5989379	3	-0.324356	-0.092554	-0.058163	0.084757	0.36861	0.217383	0.467862	0.435713	0.255467	0.169694	0.165744	0.146064	0.226006	0.163142	0.066247	0.120086	0.191324	0.164972	0.178464	0.102042	0.028018	-0.008286	-0.045938	0.036383	0.14887	0.265677	0.175208	0.098426	0.12222	0.032008	0.053449	-0.12765	-0.001364	-0.021126	-0.196477	0.00514	0.007535	-0.034775	0.016974	-0.047636	0.024409	0.039583	0.125112	0.057514	0.262719	0.092304	0.942812
chr2R_6098867_6099113	chr2R_6098867_6099113	3	-0.110923	-0.415001	-0.014513	-0.182599	-0.003218	-0.016166	-0.087974	-0.062012	-0.130138	-0.092242	0.007233	-0.120989	0.011379	-0.007004	0.007591	0.123736	0.013613	0.071011	0.12278	0.01113	0.029999	0.003613	0.02842	0.285491	0.346396	0.097537	0.154335	0.00956	0.022344	0.002051	0.009323	-0.217578	-0.17284	-0.243235	-0.015405	-0.121153	0.018701	-0.106685	-0.062235	-0.046822	0.051535	0.052596	-0.044782	0.045485	-0.102838	-0.272704	-0.413229
chr2R_6115443_6115924	chr2R_6115443_6115924	3	-0.039971	0.024548	0.023752	0.020367	0.120103	0.023001	0.032486	0.044373	0.047954	-0.078399	0.031338	0.019239	0.045535	0.057953	0.050877	0.052633	0.094262	0.072805	0.072131	0.055661	0.080452	0.134664	0.011932	0.256625	0.507833	0.079667	0.081684	0.067747	0.066522	0.059926	0.030979	-0.100924	-0.005136	0.045337	0.079076	0.170944	0.023815	0.031294	0.062954	0.077947	-0.018323	0.005982	0.008482	0.091135	0.133031	0.106497	-0.360944
chr2R_6190203_6190723	chr2R_6190203_6190723	3	-0.108661	-0.004106	0.011966	0.026435	0.068914	0.04144	0.169078	0.112681	0.112682	0.016401	0.050226	0.056337	0.057123	0.033785	0.109127	0.041226	0.030978	0.089359	0.094116	0.122231	0.092765	0.172907	0.077476	0.211727	0.057886	0.093273	0.070412	0.035839	0.158076	0.030534	0.036281	0.073492	-0.004097	0.020264	0.098749	0.164377	0.011531	0.005634	0.068891	0.049507	0.043393	0.054848	-0.04423	0.032337	0.082319	0.008835	0.6126
chr2R_6308730_6309648	chr2R_6308730_6309648	3	0.122457	-0.005761	0.089702	-0.027866	0.043798	0.201504	0.212149	0.339482	0.239922	0.168427	0.117578	0.321154	0.10157	0.035393	0.024417	0.053865	0.13966	0.094883	0.05896	0.080552	0.226779	0.392076	0.366339	0.33121	0.071532	0.116012	0.060186	0.055438	0.069598	0.093383	0.060234	0.260853	0.091111	-0.004435	0.145232	0.211283	0.03002	0.036601	0.164465	0.103839	0.065116	0.052272	-0.008997	0.038529	0.017989	0.071007	0.470635
chr2R_6315762_6316680	chr2R_6315762_6316680	3	-0.0854	-0.03281	0.11521	-0.025778	0.071068	0.249048	0.275496	0.437844	0.423417	0.173911	0.375015	0.382644	0.132929	0.055205	0.094755	0.076597	0.109703	0.11567	0.123907	0.132441	0.327846	0.288079	0.139412	0.331009	0.073864	0.216368	0.101043	0.036474	0.026624	0.010954	0.030275	0.26048	-0.101121	-0.135421	0.091295	0.049086	0.008855	-0.011918	0.117409	0.065586	0.044899	0.070132	0.01781	0.037821	-0.057602	-0.027291	0.836571
chr2R_6365224_6365598	chr2R_6365224_6365598	3	-0.346221	-0.255831	-0.004102	-0.081742	0.022302	0.255417	0.206283	0.336453	0.114091	0.120286	0.047893	0.084811	0.078028	0.028374	0.110384	0.032853	0.10685	0.139937	0.179196	0.160728	0.146716	0.160056	0.142807	0.289014	0.234271	0.084106	0.140384	0.083759	0.12237	0.028531	-0.019612	-0.094686	-0.070424	-0.101656	-0.192299	0.041067	0.008811	-0.047141	0.006112	0.036972	-0.008133	0.030056	0.006124	-0.017256	0.168117	0.045938	0.795097
chr2R_6430609_6431094	chr2R_6430609_6431094	3	-0.204393	-0.297467	0.239745	0.111934	0.443288	0.207071	0.218277	0.274787	0.128459	0.162111	0.120392	0.151848	0.092234	0.057146	0.063769	0.1933	0.163516	0.166575	0.130943	0.189895	0.098155	0.263087	0.240062	0.212625	0.189698	0.232872	0.207718	0.069072	0.051132	0.010078	0.023444	-0.059091	-0.086764	0.00814	-0.002672	-0.05835	0.016761	-0.042612	-0.047102	0.088994	0.030756	-0.014573	0.022928	0.092982	-0.028175	-0.166103	0.729743
chr2R_6446371_6446581	chr2R_6446371_6446581	3	-0.330523	-0.38514	0.129638	0.22875	0.269096	0.00292	0.002648	0.058792	0.033829	0.037807	0.065796	0.17373	0.071666	0.00132	0.255117	0.106072	0.117711	0.111914	0.091349	0.116337	0.051591	0.065894	-0.007231	0.295818	0.109195	0.222311	0.226985	0.019366	0.088861	-0.021384	-0.022235	-0.240737	-0.047244	-0.170367	-0.018974	-0.027418	-0.01918	-0.076882	-0.059596	0.019267	-0.003315	-0.046548	0.039779	0.023557	-0.092882	-0.315165	0.704418
chr2R_6451819_6452635	chr2R_6451819_6452635	3	0.095083	0.013335	0.145285	0.038511	-0.043996	0.234139	0.10914	0.359783	0.244982	0.15691	0.224438	0.112959	0.36437	0.408073	0.075182	0.059542	0.114225	0.169007	0.17375	0.242303	0.152503	0.201259	0.147824	0.292894	0.340852	0.338988	0.288831	0.069845	0.206954	0.067238	0.102275	-0.080538	0.026776	0.020171	-0.070589	0.080461	0.011043	-0.004795	0.080455	0.038031	0.049812	0.061956	0.182691	0.060653	0.158524	0.120874	-0.018295
chr2R_6489362_6489681	chr2R_6489362_6489681	3	-0.114722	0.004524	0.066803	0.037246	0.01703	0.052438	0.095882	0.223051	0.268556	0.190857	0.154242	0.091205	0.064146	-6.9e-05	0.128504	0.017744	0.128397	0.13564	0.084891	0.302544	0.137675	0.191261	0.096152	0.111703	0.120126	0.192843	0.092519	0.033276	0.108949	0.022436	0.048964	-0.158872	0.041166	-0.01416	-0.147343	-0.032024	0.018353	-0.07553	0.029561	0.031851	-0.030651	0.040863	0.073744	0.072328	-0.011351	-0.133775	-0.039872
chr2R_6504940_6505269	chr2R_6504940_6505269	3	-0.224175	-0.079993	-0.051843	-0.024617	0.150899	0.131833	0.194009	0.130669	0.0842	0.009425	0.027854	0.194534	0.201232	0.240674	0.011212	0.036754	0.092943	0.029409	0.119636	0.082079	-0.02871	0.091652	0.03223	0.07971	0.057503	0.209484	0.150832	0.038873	0.081655	0.024393	0.034275	0.111981	0.234095	0.002293	-0.179607	0.102026	0.012523	0.003913	0.040213	0.034834	0.044368	0.041137	0.209106	0.040305	0.029193	-0.147016	1.04811
chr2R_6980216_6980728	chr2R_6980216_6980728	3	-0.582032	-0.660428	0.524756	0.223527	0.327306	0.335634	0.205284	0.44161	0.263131	0.266319	-3.1e-05	-0.052991	0.037917	-0.050747	-0.037155	0.354589	0.308113	0.224562	0.267135	0.42927	0.377813	0.100605	0.178403	0.393113	0.238675	0.197264	0.147928	0.058207	0.167794	-0.035853	0.060488	-0.428184	-0.393518	0.058053	-0.112047	-0.664266	0.011673	-0.049679	-0.244406	0.050634	-0.037097	-0.019864	-0.093327	0.031592	0.31557	-0.065167	0.609352
chr2R_6982102_6982382	chr2R_6982102_6982382	3	-0.095596	-0.143562	0.528872	0.195164	0.266834	0.086174	0.072158	0.18331	0.084042	0.184863	0.043045	-0.030477	-0.009496	-0.020482	0.042602	0.228199	0.080348	0.090092	0.10409	0.060695	0.150968	0.098993	0.181982	0.262379	0.045972	0.090844	0.096521	0.000938	0.042898	-0.000649	-0.027537	-0.110605	-0.072525	0.06625	0.083027	-0.068042	0.003242	-0.020181	-0.035723	0.08532	0.03097	0.003792	-0.056848	-0.056998	-0.037258	-0.176568	0.17551
chr2R_7060989_7061361	chr2R_7060989_7061361	3	-0.28023	-0.159068	0.022501	0.015637	0.002409	0.022846	0.056174	0.089345	-0.050895	-0.00861	0.073611	0.027454	0.252905	0.415195	0.015542	0.037209	0.029289	0.110127	0.170244	0.041532	0.198058	0.109456	0.018596	0.19313	0.203147	0.182083	0.15118	0.029066	0.077964	0.075587	0.054009	-0.223621	-0.07387	-0.05526	0.023617	0.009727	0.021418	0.003427	0.013649	0.049534	0.462102	0.476735	-0.072606	0.037738	0.210891	0.137686	0.417663
chr2R_7062823_7063669	chr2R_7062823_7063669	3	-0.044431	-0.005179	0.537832	0.385827	0.42302	0.144474	0.112447	0.15127	0.008969	0.151836	-0.004355	-0.042627	0.016185	-0.026688	0.183281	0.057286	0.064729	0.10197	0.225632	0.140696	0.057125	0.072207	-0.002414	0.427389	0.104457	0.125148	0.167892	0.075472	0.041416	0.103566	0.041416	-0.248413	-0.050913	0.156201	0.215481	-0.09763	0.051925	0.006344	-0.031636	0.024626	-0.020323	0.010248	-0.086321	0.061885	0.364709	0.177399	0.496183
chr2R_7072993_7073643	chr2R_7072993_7073643	3	-0.055731	-0.034059	0.034444	0.016837	-0.07218	0.222039	0.125664	0.304456	0.117857	0.170156	0.091959	0.01546	0.031736	0.083689	0.09325	0.054138	0.091211	0.130753	0.218199	0.160643	0.044887	0.22088	0.117006	0.283128	0.170175	0.151788	0.128994	0.044921	0.222585	0.043382	0.040413	0.038686	-0.031705	-0.056118	0.068951	0.098199	0.006535	0.001078	-0.03779	0.040032	0.052005	0.094283	0.006505	0.054038	0.006316	-0.040892	-0.031872
chr2R_7084799_7085018	chr2R_7084799_7085018	3	-0.421873	-0.2424	-0.0328	-0.110986	-0.051142	0.010006	0.022892	0.045538	0.051564	0.003278	0.10122	0.087879	0.103922	0.064881	0.454875	0.152003	0.140635	0.261557	0.20021	0.187287	0.221076	0.18719	0.100422	0.178636	0.341383	0.258009	0.236369	0.134781	0.191583	0.031409	0.085614	-0.12585	-0.04158	-0.096729	-0.095555	-0.065934	0.006091	-0.073776	0.035867	0.113897	0.056881	0.048696	0.111319	0.11263	0.080472	-0.081342	-0.247891
chr2R_7091929_7092699	chr2R_7091929_7092699	3	-0.286676	-0.225316	-0.120529	0.026209	-0.032504	0.058052	0.152483	0.241518	0.066275	0.076387	0.097054	0.066182	0.150101	0.043732	0.419469	0.08683	0.084967	0.229089	0.227328	0.230946	0.1254	0.113617	0.046155	0.182034	0.258331	0.202085	0.180832	0.074965	0.091389	0.042393	0.029471	-0.243525	-0.028258	-0.106748	-0.037148	-0.060223	0.002884	-0.056748	-0.036172	0.029009	-0.040587	-0.028337	0.113612	0.050162	0.137157	0.028566	1.26733
chr2R_7254126_7254441	chr2R_7254126_7254441	3	-0.198455	-0.053818	0.040578	0.011661	-0.029953	0.017372	0.069968	0.178762	0.218225	0.054261	0.068749	0.158602	0.108646	0.043181	0.045581	0.105415	0.123134	0.158596	0.125641	0.031062	0.008542	0.075283	0.107809	0.287698	0.241319	0.131528	0.080268	0.041022	0.231036	0.053921	0.075459	0.186148	-0.053754	-0.016542	-0.112503	-0.003814	0.011948	0.002342	-0.013757	-0.031351	-0.010897	0.0744	0.065887	0.052001	0.183817	0.21539	0.190686
chr2R_7254879_7255154	chr2R_7254879_7255154	3	-0.2006	-0.215719	0.026558	-0.020614	-0.029444	0.113387	0.04458	0.078053	0.141599	0.007941	0.106684	0.403822	0.153889	0.092907	0.086095	-0.004752	0.111752	0.100411	0.051505	-0.041519	0.068423	0.132531	-0.004207	0.083733	0.108914	0.13802	0.049431	0.009211	0.019939	-0.009024	-0.007217	0.124697	-0.12099	-0.136699	-0.030257	-0.130559	0.008605	-0.06904	0.017845	-0.050554	-0.02823	0.015995	-0.055257	-0.00282	0.022566	-0.14435	0.172356
chr2R_7271587_7271865	chr2R_7271587_7271865	3	-0.03497	-0.033644	0.106953	-0.016981	-0.028096	0.059676	0.077812	0.002881	-0.033023	0.006766	0.026888	-0.01417	-0.005136	0.049594	-0.035435	0.020794	0.065212	0.021176	0.017537	0.033341	-0.05138	0.045568	0.04139	0.291858	0.062217	0.06414	0.007695	0.009338	0.031915	0.053797	0.052269	0.166657	0.123043	0.086797	0.113706	0.121319	0.024305	0.055262	0.018613	0.030309	-0.000508	-0.024986	0.064719	0.039881	0.118455	0.119843	-0.221381
chr2R_7284912_7285068	chr2R_7284912_7285068	3	0.181644	0.203785	0.019944	-0.127707	-0.279793	-0.093561	-0.085599	-0.134134	-0.179711	-0.042885	-0.037145	0.027124	-0.027841	-0.022082	0.177722	-0.011534	-0.03937	0.028282	0.059662	0.067824	0.028508	0.04012	0.058669	0.119241	-0.009109	-0.017498	0.05588	0.018898	0.003085	0.017846	0.057219	-0.151318	-0.205132	0.047389	-0.018688	0.157996	-0.002492	0.034633	0.142125	-0.032527	0.027968	-0.077506	-0.180307	-0.032348	0.136433	0.221438	0.852982
chr2R_7480427_7481309	chr2R_7480427_7481309	3	-0.168109	-0.216966	0.198611	0.134867	0.243329	0.200579	0.197395	0.175128	0.082972	0.050855	0.403622	0.082266	0.063627	0.012624	0.230711	0.188777	0.174192	0.280605	0.18601	0.19749	0.178395	0.21927	0.094859	0.357312	0.181529	0.256043	0.221604	0.087816	0.1369	0.067605	0.047849	-0.047177	-0.066109	-0.099238	0.023226	0.034074	0.032372	-0.044336	0.009284	0.045844	0.052232	0.039304	0.062917	0.078684	0.151846	-0.099082	0.831993
chr2R_7502516_7502877	chr2R_7502516_7502877	3	-0.159386	-0.155656	0.085366	0.085757	0.249451	0.103835	0.129124	0.103424	0.01564	0.023009	0.099683	0.020957	0.053125	0.048013	0.244816	0.047752	0.21896	0.247306	0.134157	0.094669	0.111059	0.17374	0.155858	0.2318	0.243386	0.211933	0.203784	0.12784	0.090141	0.041903	0.007827	-0.18779	-0.011657	-0.18435	-0.022998	-0.010026	-0.002956	-0.023575	0.010294	0.021794	-0.004252	-0.027576	0.006386	0.084016	0.077639	0.045476	0.661176
chr2R_7513945_7514277	chr2R_7513945_7514277	3	-0.329879	-0.359264	0.188348	-0.077122	-0.06934	0.035682	-0.088866	0.063693	-0.132144	-0.003696	-0.019985	-0.064201	0.076605	0.022122	-0.036461	0.023136	0.066888	0.041984	0.076371	-0.032212	0.017361	0.124867	-0.030292	0.386646	0.082915	0.092811	0.054697	-0.030039	-0.0402	0.01577	0.017354	-0.158084	-0.059601	-0.18301	0.006956	-0.1482	0.016657	-0.096306	-0.06257	-0.008479	0.001199	-0.063901	-0.002265	0.008483	-0.120018	-0.33568	-0.236196
chr2R_7519213_7519371	chr2R_7519213_7519371	3	-0.182417	-0.053324	0.326206	0.044343	0.127795	-0.119154	-0.03731	0.046296	-0.111745	-0.017969	0.019206	0.01216	-0.021242	-0.015603	0.096045	0.142093	0.15306	0.146447	0.103685	-0.010798	-0.07208	0.048621	-0.024253	0.359703	0.22721	0.184264	0.14612	0.05027	0.091047	0.090267	0.10524	-0.140614	-0.17402	0.091727	0.052288	0.008993	0.012651	-0.012581	0.061247	-0.072032	-0.034292	-0.046024	-0.171406	0.01478	0.173706	0.104712	1.24074
chr2R_7525026_7525263	chr2R_7525026_7525263	3	-0.451076	-0.235157	0.219606	0.074544	0.087191	0.011434	0.117854	0.131923	0.092204	0.131579	0.052004	0.071891	0.049119	0.002537	-0.028065	0.035128	0.045926	0.096164	0.062169	0.0237	0.022527	0.080392	0.079198	0.273668	0.042016	0.164016	0.103604	0.04859	-0.010258	-0.011414	0.036169	-0.01756	-0.153479	-0.020745	0.015668	0.132965	0.008568	-0.031109	0.084643	0.006603	0.032695	0.035019	-0.022368	0.008231	0.052021	-0.068642	-0.161646
chr2R_7545254_7545750	chr2R_7545254_7545750	3	-0.026446	-0.055811	0.226231	-0.014835	0.10297	0.146156	-0.041975	-0.029265	-0.048331	0.017301	0.31267	0.04813	0.143115	0.207407	0.089516	0.073189	0.033277	0.058621	0.054017	0.007994	0.136973	0.110729	0.031999	0.331367	0.125628	-0.017698	0.04128	0.078126	0.137012	-0.009949	0.007926	0.02394	-0.008585	-0.096779	0.006502	0.000955	0.029051	-0.009284	-0.071085	-0.008402	0.156941	0.275026	0.035759	0.020646	0.169026	0.124122	-0.129274
chr2R_7552809_7553405	chr2R_7552809_7553405	3	-0.346813	-0.182568	0.205872	-0.136429	0.114733	0.089551	0.05777	0.12779	0.013816	0.042987	0.126436	0.06129	0.068945	0.060152	0.199474	0.085868	0.124249	0.107634	0.193687	0.201307	0.077305	0.172057	0.101175	0.287483	0.166849	0.14396	0.122055	0.050063	0.183029	0.051325	0.089813	-9.8e-05	-0.001418	-0.142389	-0.138861	-0.044936	0.025163	-0.046085	-0.060085	0.048213	0.057879	0.061262	-0.059274	0.042165	0.107578	-0.02066	0.930092
chr2R_7553842_7554451	chr2R_7553842_7554451	3	-0.359006	-0.150175	0.146284	0.001285	0.064793	0.158271	0.260592	0.091071	-0.002018	0.030011	0.094387	0.051974	0.158757	0.150242	0.067573	0.172035	0.138068	0.134165	0.098843	0.03797	0.024347	0.238972	0.175596	0.159757	0.144792	0.102316	0.089108	0.055851	0.144364	-0.009967	-0.007812	0.048031	0.046179	-0.023157	-0.027448	0.162009	0.016633	0.000176	0.06238	0.035602	0.176309	0.253456	0.045824	0.145602	0.004491	-0.137847	1.27978
chr2R_8146689_8146990	chr2R_8146689_8146990	3	-0.230309	-0.184612	0.008626	0.146884	-0.015953	0.268613	0.264845	0.035577	0.055258	-0.011644	0.094792	0.232124	0.14548	0.050893	0.033884	0.158978	0.116542	0.113762	0.122169	0.073973	0.132043	0.083937	0.163397	0.070941	0.12004	0.156986	0.103901	0.036698	0.016312	0.005671	-0.035297	0.109473	-0.044508	-0.1488	-0.010516	-0.028567	0.00855	-0.054172	-0.038441	0.081038	0.07517	3.1e-05	0.019492	0.018269	0.026551	-0.084941	1.60144
chr2R_8148744_8149247	chr2R_8148744_8149247	3	-0.243878	-0.132876	-0.052211	0.098125	0.007598	0.12154	0.240841	0.211125	0.17211	0.084967	0.09957	0.101164	0.10122	0.005785	0.127571	0.190724	0.200313	0.137024	0.140544	0.157665	0.104941	0.154532	0.240257	0.074416	0.102044	0.227725	0.192231	0.066259	0.029714	0.017895	0.020035	-0.001493	-0.064694	0.01205	0.028791	0.101767	0.005757	-0.018977	0.035608	0.123075	0.051755	0.014463	0.125419	0.049889	0.121407	0.053674	0.78902
chr2R_8340634_8340972	chr2R_8340634_8340972	3	-0.188573	-0.060153	-0.004572	0.2254	0.125018	0.073197	0.214365	0.134466	0.268375	0.04874	0.387136	0.481601	0.687302	0.673191	0.155127	0.063926	0.098715	0.197875	-0.015888	0.181935	0.226551	0.075908	0.021338	-0.039412	0.038071	0.144262	0.087183	0.045433	0.10198	-0.004516	-0.030279	0.127339	0.100906	-0.083782	-0.061888	0.183576	0.017907	0.004864	0.05598	0.041766	0.196257	0.051008	0.270506	0.083638	0.059187	-0.065164	1.3808
chr2R_8341498_8341858	chr2R_8341498_8341858	3	-0.108769	-0.024248	0.172956	0.253584	0.180442	-0.010421	0.310124	0.266262	0.372071	0.160783	0.074064	0.075707	0.128924	0.093507	-0.029995	0.045101	0.217147	0.103396	0.085707	-0.001785	-0.020318	0.019808	-0.070183	0.079797	0.072568	0.197097	0.128882	0.009872	0.062272	0.06729	0.028849	0.14539	0.107658	0.006436	-0.064662	0.059133	0.028955	0.055805	0.089977	-0.036137	0.015685	0.044267	0.155424	0.099102	0.233307	0.176169	1.4311
chr2R_8566859_8567414	chr2R_8566859_8567414	3	-0.085694	-0.090607	-0.01006	0.101727	0.226151	0.089885	0.168859	0.157554	0.071853	0.095046	0.087733	0.071761	0.073972	0.042726	0.044758	0.070636	0.104324	0.116715	0.053591	0.119122	0.073506	0.0982	0.111407	0.10332	0.073659	0.125351	0.142117	0.070685	0.064894	0.016405	0.066577	-0.003108	0.148844	0.024199	0.019677	0.183882	0.029709	0.006931	0.082466	0.082371	0.030839	0.033445	0.153091	0.088188	0.083677	-0.081996	0.939757
chr2R_8846448_8846743	chr2R_8846448_8846743	3	-0.207476	0.729871	0.513285	-0.078218	-0.033218	0.004033	0.020245	-0.005843	-0.032004	0.034087	-0.011868	0.014315	0.001242	0.009916	0.140087	0.195109	0.031144	0.191173	0.119952	0.119554	0.068374	0.078171	0.174081	0.341877	0.46616	0.124391	0.148305	0.187612	0.1918	0.412533	0.359379	-0.147073	-0.054627	0.072248	0.146784	-0.119497	0.036447	0.016624	0.066599	0.078588	0.071338	0.012606	0.011046	-0.036489	0.153652	0.135878	0.213882
chr2R_8868052_8868655	chr2R_8868052_8868655	3	-0.237339	0.017972	0.13459	0.049543	0.047968	0.143759	0.185176	0.224882	0.102194	0.039344	0.100596	0.013349	0.109142	0.019112	0.046305	0.311228	0.243547	0.178043	0.147384	0.214322	0.121523	0.086421	0.365849	0.116726	0.602549	0.472802	0.275342	0.218255	0.287217	0.363771	0.730415	-0.11517	-0.054649	0.188856	-0.020005	0.025835	0.021004	0.024938	0.093511	0.053989	0.049646	0.057529	0.040469	0.104654	0.238432	0.213822	0.512082
chr2R_8872080_8872371	chr2R_8872080_8872371	3	-0.334126	-0.03246	0.174395	-0.044507	-0.010357	0.022887	0.034179	0.126568	0.154312	0.072039	0.054175	0.010378	0.078593	0.047267	0.144137	0.160259	0.036032	0.102949	0.081067	0.087299	0.125661	0.099332	0.116302	0.197579	0.349175	0.265126	0.123334	0.10478	0.147601	0.198068	0.27912	-0.11547	-0.006154	-0.01247	0.075786	-0.116724	0.012115	-0.063443	-0.028929	-0.00556	0.025718	0.047885	0.01627	0.000685	-0.015306	-0.027697	0.211396
chr2R_8872897_8873540	chr2R_8872897_8873540	3	-0.180918	-0.101648	0.226098	0.026587	0.003137	0.190269	0.104957	0.327163	0.145225	0.129759	0.076562	0.052908	-0.009618	0.035125	0.127588	0.17207	0.077705	0.126846	0.078866	0.145578	0.137145	0.15785	-0.030161	0.203519	0.382113	0.263792	0.166207	0.085983	0.155604	0.265194	0.382786	-0.060151	0.045157	0.05541	0.016644	-0.044856	0.01294	-0.009647	0.01153	0.069681	0.000476	0.037693	-0.045684	0.031639	0.181249	0.022745	0.105195
chr2R_8878242_8878803	chr2R_8878242_8878803	3	-0.197836	-0.046866	0.105628	0.029077	-0.185495	0.082125	0.045855	0.135434	0.116883	0.026655	0.252082	0.093367	0.062188	0.025674	0.194838	0.155232	0.105073	0.146251	0.194866	0.142937	0.134394	0.202403	0.118311	0.114631	0.437393	0.480555	0.472973	0.196978	0.2682	0.286052	0.420469	-0.04537	0.034617	0.004756	-0.061419	-0.130436	0.004137	-0.051029	-0.047656	-0.029353	0.014801	0.06376	0.060751	0.121186	0.11348	0.051791	0.00563
chr2R_8879191_8879668	chr2R_8879191_8879668	3	-0.149397	0.053798	0.119607	-0.053351	-0.019822	0.025927	0.048067	0.082265	-0.047931	0.046149	0.133354	0.026767	0.054687	0.029363	0.337715	0.124483	0.100616	0.135632	0.113076	0.109034	0.119761	0.199908	0.119919	0.219513	0.428863	0.417828	0.25686	0.099515	0.203109	0.194666	0.294904	-0.042106	-0.021418	0.008793	-0.016882	-0.019431	0.00399	-0.00848	0.046316	0.00057	-0.000305	0.080658	0.041624	0.030045	0.128756	0.024194	0.162178
chr2R_8883690_8884208	chr2R_8883690_8884208	3	-0.102628	0.115183	0.170095	-0.036373	0.029759	0.042259	0.063201	0.049075	0.048661	0.019955	0.298363	0.136081	0.069882	0.107157	0.088616	0.185797	0.106928	0.152352	0.136169	0.168939	0.030799	0.144599	0.306347	0.186774	0.478392	0.418769	0.240897	0.206327	0.262987	0.312052	0.471319	-0.04777	-0.024406	-0.055565	0.05216	0.124532	0.021605	0.015187	0.024505	0.000789	0.065103	0.08707	0.014783	0.047998	0.100982	0.013242	-0.006949
chr2R_8903105_8903505	chr2R_8903105_8903505	3	-0.170222	0.04194	0.12457	-0.015267	0.011304	0.061301	0.044115	0.14046	0.055543	0.05367	0.115629	0.067753	0.107655	0.016092	0.246729	0.187606	0.148328	0.139919	0.140235	0.173981	0.240402	0.244644	0.184517	0.136127	0.459033	0.398223	0.292492	0.126839	0.376163	0.257922	0.462208	-0.089552	-0.027163	-0.020343	0.044987	0.005416	0.009063	0.007163	0.07717	0.064361	0.017302	0.015067	0.097717	0.047073	-0.028144	-0.08365	-0.143666
chr2R_9223342_9223533	chr2R_9223342_9223533	3	-0.34012	-0.245095	-0.120592	0.270332	0.135465	0.473957	0.50888	0.301965	0.342637	0.17949	0.048774	0.008732	0.193	-0.030889	-0.008877	0.131061	0.120776	0.14658	0.194021	0.287805	0.214412	0.198568	0.21968	0.042438	0.12703	0.23954	0.092508	0.012288	0.027208	0.02108	-0.030826	-0.25819	-0.132312	0.035396	-0.116291	-0.11739	-0.012147	-0.062793	-0.054719	0.076314	-0.014378	0.009902	-0.001402	0.031753	0.098042	-0.13419	1.00239
chr2R_9225457_9225752	chr2R_9225457_9225752	3	-0.315293	-0.083073	-0.05412	-0.04039	0.072204	0.182101	0.205888	0.274539	0.16996	0.136989	0.134484	0.037276	0.090141	0.059973	0.114258	0.149105	0.125871	0.209953	0.168071	0.260559	0.112667	0.157509	0.122959	0.194326	0.104783	0.292312	0.133196	0.038528	0.135421	0.038461	0.039631	-0.053724	-0.114381	0.003292	-0.089748	0.001214	0.016362	0.038066	-0.018282	-0.060118	0.040722	0.063671	-0.07803	0.060905	0.171156	0.069839	0.096263
chr2R_9427218_9427639	chr2R_9427218_9427639	3	-0.122359	-0.177931	0.113693	0.019755	0.09569	0.110612	0.178039	0.242278	0.274506	0.070995	0.045039	0.099653	0.017761	0.018169	0.146749	0.043113	0.164007	0.208951	0.085441	0.147968	0.072949	0.109731	0.026593	0.144176	0.178036	0.113094	0.148319	0.006766	0.148801	0.001077	0.036089	0.023494	0.188979	-0.236219	-0.115543	-0.061681	0.011116	-0.083713	-0.062004	0.053644	-0.017396	0.044957	0.127736	0.056975	-0.153444	-0.221552	0.160069
chr2R_9510276_9510720	chr2R_9510276_9510720	3	0.036484	0.122865	0.020981	-0.042712	-0.023971	0.038477	0.095539	0.044569	0.083673	-0.031665	0.001881	0.022595	0.003486	0.074492	0.115222	0.011481	-0.002111	0.056855	0.045199	0.015676	0.048389	0.079952	0.094348	0.11149	0.017046	0.012495	0.028062	0.068354	0.030299	0.035796	0.020342	-0.043116	-0.026965	0.140669	0.094311	0.113198	0.006935	0.041452	0.087645	0.03837	0.033276	0.102054	0.079295	0.032777	0.150845	0.069822	0.040948
chr2R_9785011_9785513	chr2R_9785011_9785513	3	-0.130814	-0.282071	0.079429	0.149404	0.185107	0.147487	0.266518	0.241666	0.031002	0.062275	0.039391	0.049902	0.079344	0.014892	0.031439	0.155665	0.112316	0.094983	0.130882	0.227829	0.17655	0.125627	0.316509	0.187014	0.050193	0.189082	0.093779	0.020758	-0.017679	-0.016577	-0.010695	-0.094565	-0.024707	-0.094707	0.056775	0.036971	-0.00058	-0.003984	-0.000673	0.135493	0.045919	-0.009974	0.023287	0.038597	0.047395	-0.063121	0.495565
chr2R_9812944_9813231	chr2R_9812944_9813231	3	-0.065502	-0.29111	0.1871	0.083808	0.188072	0.108391	0.037015	0.082398	-0.028682	0.090213	0.035708	-0.001406	0.00808	-0.03573	-0.022477	0.078629	0.08955	0.183948	0.115752	0.087376	0.063925	0.259784	0.146486	0.278878	0.095684	0.078924	0.049288	0.009834	0.00412	-0.003964	-0.01644	-0.179482	0.162644	-0.188515	-0.064177	0.064648	0.004516	-0.047862	0.005842	0.042984	-0.023755	0.015092	-0.038601	0.048993	-0.011123	-0.24156	1.35356
chr2R_9818136_9818367	chr2R_9818136_9818367	3	-0.349393	-0.223723	0.287046	-0.170254	0.014498	0.287047	0.256666	0.367106	0.41715	0.229699	0.029761	-0.006265	0.07197	-0.017051	0.024052	0.118848	0.111271	0.11604	0.213202	0.204176	0.102472	0.198566	0.083899	0.286092	0.120019	0.171644	0.104184	0.005809	0.044454	0.027758	0.042994	0.004792	-0.235611	-0.024804	-0.061753	-0.156569	0.005888	-0.114547	-0.036236	-0.017538	0.046612	-0.008742	-0.165061	-0.014662	-0.224063	-0.40868	0.004493
chr2R_9850034_9850331	chr2R_9850034_9850331	3	-0.26755	-0.351493	0.081489	0.057521	0.225466	-0.049516	0.363294	0.312037	0.220377	0.196716	0.18652	0.150553	0.1739	0.067748	0.061826	0.104785	0.249939	0.202933	0.171802	-0.014947	-0.03617	-0.015009	-0.011635	0.205539	0.105413	0.277448	0.127772	0.092465	0.066294	0.006479	-0.038452	-0.138083	-0.073236	0.114742	-0.104954	0.178737	-0.008221	0.006221	0.102818	-0.030681	0.019479	-0.042726	0.013302	0.146722	0.304627	0.257225	0.68211
chr2R_9879230_9879528	chr2R_9879230_9879528	3	-0.250869	-0.431483	0.162682	0.228632	0.125387	0.163743	0.135298	0.185853	-0.020649	0.031435	0.126189	0.110944	0.077201	0.007743	-0.006035	0.136439	0.104082	0.076476	0.22392	0.094238	0.100324	0.094315	0.12279	0.069545	0.113734	0.141513	0.077719	0.048487	0.050614	-0.060786	-0.032277	-0.05859	-0.072418	-0.250838	-0.204192	-0.129692	-0.013088	-0.124953	-0.068755	0.025217	-0.027763	-0.041336	-0.070135	-0.01001	-0.163783	-0.293699	0.799874
chr2R_9883192_9883365	chr2R_9883192_9883365	3	-0.243938	-0.249325	0.139357	0.09352	0.070806	0.154875	0.052582	0.07361	-0.017385	0.041602	0.07749	-0.006079	-0.027008	0.020437	0.081629	0.138586	0.105677	0.11588	0.136034	0.059183	0.157961	0.157722	0.068301	0.173346	0.118498	0.142769	0.114285	0.039119	0.05752	-0.014778	-0.078036	-0.122124	-0.125662	-0.237538	0.011569	-0.311914	-0.013759	-0.058894	-0.145823	0.005178	0.042135	0.03433	-0.054976	-0.023096	-0.039531	-0.242642	-0.111328
chr2R_9888254_9888639	chr2R_9888254_9888639	3	-0.249521	-0.200016	0.495742	0.119855	0.189971	-0.032742	-0.002286	0.106246	0.020266	0.070106	0.090299	0.040152	0.033084	0.088818	0.045039	0.082279	0.254533	0.165608	0.298202	0.045184	0.000885	0.183984	-0.014213	0.345663	0.480238	0.16781	0.136458	0.058294	0.294575	0.009948	0.076171	-0.233844	-0.157402	0.048368	0.085739	-0.03698	0.005451	-0.050835	-0.020255	-0.03869	-0.031133	-0.007046	0.010346	-0.006587	0.472103	0.273445	-0.282498
chr2R_9894196_9895024	chr2R_9894196_9895024	3	-0.264369	-0.142117	0.145877	-0.050277	0.066742	0.094654	0.248267	0.44642	0.176333	0.135765	0.202471	0.030391	0.048652	0.012837	0.215821	0.15111	0.170155	0.13069	0.217956	0.087421	0.023481	0.109957	-0.005226	0.31973	0.216436	0.121601	0.094712	0.051408	0.035035	0.012515	0.019628	-0.061348	-0.094591	0.053843	-0.081632	0.096263	-0.004026	-0.045666	0.023051	0.011349	0.012464	0.020492	0.028402	0.144642	0.159078	0.082936	-0.117813
chr2R_9912188_9912418	chr2R_9912188_9912418	3	-0.337401	-0.203494	-0.010078	-0.044706	0.03168	-0.018175	0.049169	0.065104	-0.020341	-0.022	0.105633	0.029022	0.061642	0.017946	0.107078	0.052917	0.081494	0.163198	0.106464	0.010023	0.017815	0.029094	0.005013	0.290527	0.471981	0.234558	0.153293	0.056962	0.099185	0.03498	0.010779	-0.273521	-0.098347	0.052796	-0.158413	0.134986	0.017047	0.004393	0.08762	-0.021413	-0.040143	0.19258	0.071006	0.043028	0.265395	0.058831	-0.329586
chr3L_1008045_1008333	chr3L_1008045_1008333	3	-0.041652	-0.032507	-0.068568	-0.026943	-0.009508	0.148263	0.057534	0.13492	0.089847	0.007501	0.074846	0.018429	0.051537	0.024126	0.082985	0.09114	-0.009681	0.098608	0.062199	0.078873	0.213794	0.085518	0.03696	0.18978	0.121453	0.081545	0.090391	0.027619	0.226194	0.006476	0.038816	-0.191243	-0.050682	-0.074006	-0.051846	-0.134049	0.013224	-0.052493	-0.016853	0.013455	0.041834	0.050649	0.059476	-0.013795	-0.068308	-0.236299	0.261709
chr3L_10674012_10674369	chr3L_10674012_10674369	3	-0.130081	-0.07842	0.233837	0.091606	0.132322	0.175869	0.218864	0.255031	0.207105	0.215491	0.105361	0.023918	0.020612	0.01836	0.081354	0.198044	0.194033	0.162928	0.187058	0.290497	0.136604	0.145636	0.044795	0.26037	0.26176	0.134619	0.083865	0.064331	0.231338	0.029872	0.081135	-0.117295	0.03118	0.08808	-0.07279	0.001682	0.02529	0.003632	-0.015693	0.041525	0.032563	-0.042702	-0.053638	0.020273	0.402347	0.077547	-0.422155
chr3L_10732191_10732625	chr3L_10732191_10732625	3	-0.24168	-0.176677	-0.133047	-0.063578	-0.108007	-0.006921	-0.004738	0.090064	0.020824	-0.020205	0.155989	-0.015151	0.076764	0.077007	0.326042	0.12711	0.176486	0.336338	0.205381	0.15152	0.096743	0.135656	0.007807	0.115594	0.490014	0.299367	0.299253	0.127524	0.17571	0.057428	0.098322	-0.131856	0.011334	-0.059633	-0.023401	0.049129	-0.00631	-0.024727	0.047583	-0.005244	0.021443	0.072203	0.040841	0.094563	0.086483	-0.025602	-0.657081
chr3L_10845929_10846228	chr3L_10845929_10846228	3	-0.314376	-0.072287	-0.000504	-0.104577	-0.073606	0.053454	-0.033964	-0.026222	0.04227	0.018373	0.063897	0.013799	0.059338	0.006913	0.029472	0.007745	0.009395	0.119862	0.096567	0.124184	0.086635	0.245649	0.202298	0.023885	0.16895	0.12916	0.116715	0.011619	0.079018	0.037878	0.061234	0.019056	-0.014759	-0.04586	0.030003	0.024676	0.015029	-0.008969	0.025762	-0.009074	0.01685	0.003462	0.014597	-0.02882	0.079741	0.000112	-0.340479
chr3L_10849705_10850161	chr3L_10849705_10850161	3	0.040057	-0.073242	-0.022345	-0.019047	-0.034948	0.012162	0.085654	0.089259	0.111944	0.041581	0.105944	0.041724	0.020604	0.040964	0.089138	0.057843	-0.021617	0.093373	0.05141	0.041791	0.024629	0.126463	-0.018178	0.087625	0.083112	0.142448	0.130726	0.03479	0.122673	-0.003387	0.03144	-0.002067	-0.052346	0.030752	-0.019208	0.088141	0.002124	-0.009173	0.007816	0.020152	0.002416	0.094877	-0.023884	0.058982	0.082234	0.041187	-0.089523
chr3L_1096717_1097028	chr3L_1096717_1097028	3	0.052035	0.391046	0.115636	-0.001505	-0.091111	0.085623	0.018066	0.066088	-0.131226	-0.020063	0.033789	-0.070304	-0.030881	-0.028042	0.086267	0.062668	-0.001669	0.046904	0.044992	0.005868	0.040596	0.030533	0.096802	0.269364	0.096884	0.046019	0.02924	0.024061	0.015338	0.201384	0.019081	-0.16917	-0.086907	0.032431	0.098668	-0.032966	0.021157	0.034773	0.029364	0.050114	0.00335	-0.009899	-0.0398	0.022413	0.072491	-0.032243	-0.188405
chr3L_1098473_1099043	chr3L_1098473_1099043	3	-0.200221	0.120523	0.015061	-0.019593	0.137926	0.01379	0.084602	0.075029	0.004867	-0.028674	0.11331	0.043604	0.015853	0.016654	0.056193	0.06538	0.069051	0.10192	0.044399	0.046145	-0.046105	0.130029	-0.001189	0.210414	0.483534	0.131214	0.074073	0.096881	0.186789	0.14293	0.121473	0.017071	0.008267	0.077422	0.049401	0.213861	0.01069	0.03352	0.068768	0.008878	0.068944	0.03928	-0.05786	0.042443	0.057165	-0.018595	-0.028423
chr3L_11002198_11002578	chr3L_11002198_11002578	3	-0.169953	0.516075	0.072697	-0.097854	-0.062658	0.046436	0.009237	0.018024	-0.039003	-0.011092	0.06536	0.031543	0.041256	-0.01133	0.033896	0.046117	0.052873	0.07898	0.110705	0.006731	-0.009871	0.112864	-0.060157	0.252583	0.579041	0.385207	0.223783	0.210366	0.396163	0.419289	0.644266	-0.186803	-0.045037	-0.016059	-0.054072	0.075414	0.012546	0.002134	0.072036	0.014153	-0.005392	0.02581	0.029204	0.024737	0.195289	0.276402	0.403424
chr3L_1102266_1102713	chr3L_1102266_1102713	3	-0.195338	0.127639	-0.018568	-0.072802	-0.058985	0.055555	0.080308	0.041039	-0.053883	-0.046281	0.124613	0.186473	0.028489	0.062686	-0.028846	0.128709	0.052333	0.178898	0.172821	0.101897	0.043826	0.16799	0.042343	0.279941	0.429074	0.379143	0.346376	0.185538	0.316415	0.33801	0.39911	-0.118394	0.068851	0.090314	-0.026819	0.147388	0.003591	0.029706	0.06038	0.041848	0.032363	-0.009187	-0.033929	-0.000215	0.091338	0.028717	0.039686
chr3L_11239085_11239473	chr3L_11239085_11239473	3	-0.338006	-0.189496	0.246039	0.015176	0.070868	0.084662	-0.017435	0.053202	-0.001652	0.012559	0.031658	0.015429	0.026859	0.025808	0.102095	0.070828	0.066337	0.087178	0.061484	0.08887	0.113726	0.116561	0.086728	0.21381	0.1284	0.0471	0.044935	-0.00321	0.05993	-0.02641	-0.009962	-0.113926	0.101351	-0.083705	-0.00484	-0.029044	0.012455	-0.039194	-0.05718	0.03233	0.023918	0.042785	-0.01224	0.011893	0.06069	-0.124067	0.012676
chr3L_11240531_11241263	chr3L_11240531_11241263	3	-0.000165	-0.211263	0.10465	0.134638	0.083062	0.033657	0.059526	0.110146	0.139717	0.049851	0.045201	0.070399	0.074595	0.014974	0.054823	0.248431	0.10063	0.113138	0.045895	0.155801	0.043136	0.152357	0.157299	0.207527	0.222442	0.088722	0.116654	0.044231	0.057299	0.005692	-0.005735	0.050722	0.140677	-0.113302	-0.00084	-0.010046	0.020155	-0.02538	-0.010066	0.039395	0.006894	-0.003385	0.004124	0.110939	0.050426	-0.131712	0.009951
chr3L_11245144_11245463	chr3L_11245144_11245463	3	-0.574122	-0.118559	0.151259	0.109218	0.010691	0.194472	0.235772	0.077659	-0.008028	-0.01647	0.081775	0.004952	0.131712	-0.042562	0.143338	0.304363	0.219285	0.081958	0.177879	0.011231	-0.018677	0.191031	0.151683	0.007192	0.204105	0.13381	0.052149	0.069266	0.086065	0.043249	0.073506	-0.150555	-0.157936	-0.004849	-0.20194	0.105375	0.005887	-0.005657	0.007308	0.032356	0.040123	0.00957	-0.048083	-0.017607	0.225454	-0.053891	1.40793
chr3L_1177049_1177500	chr3L_1177049_1177500	3	-0.328565	0.23378	0.009997	-0.187743	-0.080025	0.047862	0.04077	0.046111	-0.121158	-0.060598	0.117204	-0.089307	-0.012072	0.011637	0.067855	-0.003101	0.062138	0.09849	0.132304	0.056362	0.03594	0.141171	0.175132	0.309407	0.56502	0.126566	0.098495	0.163851	0.320596	0.307707	0.414727	-0.147215	-0.004911	-0.020988	-0.15121	-0.062095	0.009323	-0.022433	-0.017533	-0.004846	0.051219	0.031356	-0.088064	0.004782	0.078881	-0.142291	0.562463
chr3L_12483091_12483445	chr3L_12483091_12483445	3	-0.300082	-0.085168	0.127782	-0.093109	-0.053829	0.208755	0.075584	0.25815	0.151983	0.060819	0.073606	0.111827	0.128878	0.197857	0.080354	0.0097	0.129002	0.087081	0.097508	0.116302	0.107829	0.119899	0.08667	0.376126	0.171394	0.064394	0.011122	0.038997	0.0557	0.084754	0.063676	0.285743	-0.100204	0.007797	-0.077845	-0.146723	0.007397	-0.037063	-0.060619	0.029787	0.01545	0.083842	0.084934	-0.05287	0.145172	0.160205	0.89533
chr3L_12508636_12509160	chr3L_12508636_12509160	3	-0.102653	-0.117395	0.042435	0.44701	0.297599	0.296068	0.495941	0.231212	0.300562	0.115936	0.094968	0.398849	0.195768	0.138302	0.057611	0.040863	0.34974	0.110936	0.07724	0.154985	0.141267	0.14845	0.00387	0.056818	0.090251	0.248975	0.166616	0.022352	0.081491	-0.008824	0.103399	0.297724	0.304319	0.014969	-0.174793	0.068859	0.007137	-0.012995	0.041698	0.027952	0.008138	0.000599	0.280741	0.089744	0.067805	-0.024552	1.7965
chr3L_12784112_12784390	chr3L_12784112_12784390	3	-0.087579	-0.19488	0.215885	0.169927	0.180123	0.111089	0.11613	0.149427	0.0688	0.044237	0.036787	-0.004266	0.042591	-0.014996	0.05003	0.054095	0.146268	0.127125	0.125871	0.017201	0.090877	0.160935	0.091258	0.073533	0.025476	0.030191	0.018076	0.029301	0.01085	-0.013315	-0.073729	-0.016603	-0.024276	-0.143115	-0.007216	0.000493	-0.013684	-0.06357	-0.031517	-0.024431	-0.019912	-0.005685	-0.014193	-0.001397	-0.090126	-0.308924	0.369394
chr3L_128437_128730	chr3L_128437_128730	3	-0.142978	-0.198569	0.039343	0.016126	-0.078263	0.034476	0.038142	0.128439	0.155535	0.036855	0.166167	0.112528	0.055422	0.049424	0.033518	0.095326	0.07133	0.286822	0.102388	0.062324	0.102521	0.139754	0.102952	0.190296	0.123484	0.104342	0.041379	0.008413	0.109969	-0.033401	-0.087203	-0.026016	-0.037852	-0.106704	0.034582	0.037758	-0.014326	-0.057749	0.014966	0.098022	0.001495	0.011025	-0.084595	0.041354	-0.009293	-0.148094	-0.350791
chr3L_12906991_12907217	chr3L_12906991_12907217	3	-0.047665	-0.127899	-0.190605	-0.213109	-0.063094	0.008451	-0.106059	0.110288	-0.072283	-0.086641	0.264523	0.078374	-0.008524	-0.034711	0.131737	0.005442	-0.085962	0.131373	0.05139	0.105224	0.182739	0.303357	0.120865	-0.066784	0.058073	0.077808	0.063648	-0.006749	0.018346	-0.038979	0.019069	0.052024	-0.081074	-0.408473	0.040026	0.37287	-0.028652	-0.026253	0.153975	0.068765	-0.001511	0.010244	-0.088057	-0.013135	-0.290512	-0.368938	-0.12395
chr3L_129284_129492	chr3L_129284_129492	3	-0.242657	-0.169689	0.00805	0.014313	0.199253	0.090377	0.168263	0.17368	0.03092	0.054452	0.075292	0.000219	-0.027899	0.018135	0.073934	0.081189	0.08345	0.098011	0.026325	0.035835	-0.002775	0.147812	0.1191	0.17906	-0.00301	0.042305	0.017613	0.050565	0.071249	0.013562	-0.02794	-0.046338	-0.096942	-0.039602	-0.101258	0.042411	0.0183	-0.062146	0.032614	0.100591	-0.012233	0.002968	-0.14708	-0.017578	-0.059302	-0.251022	1.06666
chr3L_13221568_13221904	chr3L_13221568_13221904	3	-0.313154	-0.119573	-0.171582	-0.137187	0.03795	0.080796	-0.048563	0.035821	-0.165256	-0.11272	0.209218	0.115488	0.150205	0.164159	0.040995	0.070942	0.108784	0.231561	0.210914	0.209799	0.172069	0.204952	0.351049	0.060889	0.290766	0.249826	0.158455	0.185605	0.207891	0.132377	0.199415	-0.052183	-0.100927	-0.166034	-0.110715	-0.139291	0.00022	-0.056145	0.047819	0.037486	0.080705	0.030488	0.036358	0.084224	-0.045394	-0.001301	-0.233936
chr3L_13248197_13248564	chr3L_13248197_13248564	3	0.306527	0.186065	-0.011262	0.154178	-0.060984	0.057212	0.045516	-0.053786	-0.017192	-0.003042	-0.011734	-0.002316	-0.009521	-0.011039	0.079669	-0.03612	0.046883	0.06512	0.027499	0.110912	0.095967	0.052043	0.092532	0.049635	0.008452	-0.005984	-0.009789	0.029988	0.032472	0.037114	0.000292	-0.050086	-0.07121	0.178564	0.022054	0.087122	0.007636	0.102299	0.052413	0.05697	-0.040892	-0.013538	-0.032028	0.110369	0.193158	0.184657	-0.274443
chr3L_1366919_1367102	chr3L_1366919_1367102	3	-0.43577	-0.205816	-0.030121	-0.135594	0.030305	0.229602	0.092317	0.177894	0.106092	0.028746	0.023495	0.025862	0.26877	-0.058944	-0.072214	0.099265	0.056957	0.110495	0.072304	0.197758	0.15849	0.11144	0.427651	0.157118	0.140297	0.288139	0.102128	0.037076	0.129079	0.044122	0.010821	-0.181506	-0.168529	-0.151318	-0.059466	-0.182089	0.011402	-0.110819	-0.070061	0.025407	-0.034348	-0.002444	-0.03044	0.015707	-0.132038	-0.291877	-0.749589
chr3L_1368361_1368667	chr3L_1368361_1368667	3	-0.404843	-0.144025	0.05739	-0.141943	-0.028073	0.115901	0.034656	0.201607	0.112932	0.117443	0.058042	0.026668	-0.047881	-0.057459	0.056646	0.090347	0.053816	0.128096	0.116187	0.146382	0.067818	0.105139	0.213161	0.260706	0.138508	0.180616	0.097196	0.034599	0.084561	0.067521	0.006331	-0.221615	-0.02657	-0.11978	-0.099468	-0.159094	0.00059	-0.037101	-0.05281	-0.004607	-0.000344	0.017236	-0.09921	-0.03584	0.072968	-0.121495	-0.151231
chr3L_13912968_13913250	chr3L_13912968_13913250	3	-0.481733	-0.067319	0.061707	0.110077	-0.107868	0.03588	0.039806	-0.005548	0.004717	0.014024	0.047174	0.197528	0.088091	0.021539	0.100637	0.063118	0.118711	0.108739	0.162617	0.112456	0.101511	0.124612	0.080139	0.113685	0.114071	0.153634	0.105811	0.144738	0.092924	0.069314	0.142214	-0.10672	-0.05526	-0.141031	-0.148911	0.033767	-0.001292	-0.035503	0.063722	0.075898	0.051777	0.051907	0.041531	-0.053107	0.134005	0.064078	0.425064
chr3L_14214027_14214562	chr3L_14214027_14214562	3	-0.148302	-0.117449	-0.048306	0.019722	0.100298	0.083859	0.104553	0.115426	-0.055031	-0.064794	0.099181	0.131207	0.208859	0.275356	0.185635	0.073821	0.162865	0.075647	0.144882	0.158722	0.163394	0.250288	0.350303	0.159803	0.193328	0.237636	0.115327	0.11964	0.07776	0.131288	0.112817	-0.030178	-0.05626	-0.070813	-0.027641	0.058205	0.011196	-0.049813	0.020968	0.085149	0.084069	0.025604	0.099132	-0.013923	-0.057871	-0.173695	0.587058
chr3L_14265842_14266256	chr3L_14265842_14266256	3	-0.186474	-0.192404	-0.043225	-0.069883	0.120761	0.215776	-0.028168	0.05282	-0.125259	-0.046531	0.040815	-0.055414	-0.017264	-0.000392	0.057751	0.082678	0.036034	0.173707	0.118756	0.142491	0.138795	0.148078	0.111229	0.397634	0.203663	0.160653	0.094655	0.049561	0.152838	0.059895	0.102518	-0.069329	-0.017432	-0.096418	-0.013548	-0.016797	0.00083	-0.07662	-0.050333	0.045857	-0.000604	0.037132	-0.066622	0.017542	-0.016603	-0.148198	-0.279751
chr3L_14267127_14267523	chr3L_14267127_14267523	3	-0.180393	-0.080179	-0.077504	-0.063979	0.009725	0.054436	-0.016177	0.02518	-0.005494	-0.045446	0.046467	-0.006833	0.012214	0.002706	0.026162	0.084372	0.016123	0.062902	0.08637	0.040955	0.0185	0.170884	0.192889	0.094458	0.04127	0.072879	0.107692	0.08722	0.059026	0.040959	0.061516	-0.057918	-0.029602	-0.107186	0.011893	0.05969	0.019672	-0.019805	0.058652	-0.000334	0.043442	0.048887	-0.051266	0.065093	0.074992	-0.021461	0.025486
chr3L_14699632_14699934	chr3L_14699632_14699934	3	0.05264	-0.053429	0.119479	-0.069958	-0.077915	0.003158	-0.013723	-0.031966	0.011028	-0.022862	-0.02644	0.00577	-0.034578	-0.022543	-0.02558	0.024496	-0.051777	0.053129	0.089156	0.010711	-0.027919	-0.004247	-0.04257	0.182505	0.02039	0.052206	0.025364	0.033952	-0.006513	0.027782	-0.001364	-0.071151	0.042159	0.009378	0.08729	-0.09396	0.007399	-0.008882	-0.003541	-0.055376	-0.038303	-0.004425	-0.018118	0.014538	0.095506	0.029684	-0.233917
chr3L_14750127_14751463	chr3L_14750127_14751463	3	-0.241317	-0.129402	-0.027171	0.093578	0.289249	0.388904	0.52051	0.27007	0.224945	0.059724	0.311811	0.161671	0.163025	0.061571	0.180758	0.168762	0.185736	0.185287	0.192489	0.191716	0.124873	0.202601	0.141195	0.127274	0.259574	0.227687	0.165318	0.087838	0.1555	0.036984	0.129896	-0.000297	0.052411	0.07421	-0.031333	0.148154	0.004346	0.019882	0.097431	0.075366	0.028749	0.028452	0.110437	0.099136	0.238327	0.073849	1.55451
chr3L_14774100_14774624	chr3L_14774100_14774624	3	-0.17862	-0.063672	0.070698	0.002438	0.162234	0.201098	0.135491	0.13177	0.126872	0.080984	0.044752	0.090071	0.034677	-0.016451	0.18379	0.164666	0.087016	0.114395	0.124524	0.095087	0.20071	0.169097	0.066622	0.283842	0.079622	0.083611	0.091768	0.021904	0.053459	-0.005517	0.01385	-0.102246	0.040486	-0.162982	-0.07046	-0.056634	0.003735	-0.016693	-0.028767	0.077691	0.012164	-0.008791	-0.029212	0.062158	0.130431	-0.043209	0.104729
chr3L_15072416_15072771	chr3L_15072416_15072771	3	-0.030558	-0.193699	0.020227	0.02592	0.182233	0.064643	0.03612	0.083944	-0.035576	-0.04354	0.128948	0.117389	0.173641	0.282357	-0.015203	0.006398	0.018039	0.014387	0.12743	0.124556	0.057202	-0.020723	0.190318	0.158658	0.084439	0.105152	0.096136	0.273946	0.031704	-0.017731	-0.029933	-0.038154	0.029848	-0.041222	-0.021447	0.178748	0.017863	0.000784	0.020613	0.063602	-0.052391	-0.025527	0.200001	-0.002499	-0.053601	-0.196593	-0.161058
chr3L_15097470_15097712	chr3L_15097470_15097712	3	-0.060466	0.099117	0.049258	0.034542	-0.136686	0.026143	0.040944	0.041319	0.179069	0.065558	0.114557	0.030376	0.064295	0.084753	0.048743	0.105059	0.091609	0.092722	0.092539	-0.054107	-0.003804	0.045236	0.09843	0.149238	0.023881	0.261841	0.121509	0.086344	0.275273	8.6e-05	0.063695	-0.069918	-0.087882	0.137962	-0.019573	0.105839	0.021726	0.02692	0.080782	-0.052588	0.07733	0.099943	0.056457	0.174436	0.264132	0.177855	-0.239416
chr3L_15100517_15100933	chr3L_15100517_15100933	3	-0.219785	-0.020928	-0.000927	-0.080101	-0.141791	-0.026723	0.173991	0.223446	0.171497	0.157378	0.104208	0.106376	0.07086	0.043137	0.189604	0.121904	0.176427	0.222471	0.156485	0.143168	0.006819	0.0546	0.043479	0.133241	0.234056	0.224425	0.185248	0.047617	0.234446	0.049422	0.065205	-0.112364	-0.086	0.041108	-0.020615	-0.034712	0.008323	-0.003137	0.039151	-0.017047	-0.018755	0.067149	0.100332	0.066308	0.213363	0.149745	0.131202
chr3L_15225075_15225266	chr3L_15225075_15225266	3	-0.375808	-0.122015	-0.016683	-0.243241	-0.110208	0.21175	0.21168	0.524045	0.368516	0.283634	0.07026	0.041218	0.018461	0.03255	0.045901	0.063146	0.08459	0.138289	0.16371	0.223667	0.187088	0.122095	0.006887	0.409792	0.174094	0.266486	0.165029	0.077036	0.104403	0.094383	0.057785	-0.193817	-0.145042	-0.029457	-0.120407	-0.348074	0.006708	-0.11232	-0.140562	-0.07809	-0.019567	0.010514	-0.027031	-0.017972	-0.00321	-0.083688	-0.179937
chr3L_15228501_15228845	chr3L_15228501_15228845	3	-0.011828	-0.082912	-0.058496	0.087551	0.084792	0.192901	0.188432	0.118337	0.054872	-0.009667	0.150285	0.092368	0.106663	0.008794	0.115906	0.096647	0.082222	0.210359	0.102519	0.091129	0.047393	0.114293	0.14228	0.126122	0.073299	0.128922	0.093919	0.063323	0.074387	0.068168	0.029877	0.048592	-0.034587	-0.010769	0.068664	0.105829	0.015707	-0.010308	0.093223	0.008337	0.002511	0.015421	-0.033081	0.050098	0.119852	-0.032296	1.1666
chr3L_15297582_15297960	chr3L_15297582_15297960	3	-0.33252	-0.043985	-0.090862	-0.216723	-0.021312	0.055025	-0.028565	0.161281	0.007409	0.069151	0.116489	0.155601	0.056605	0.041703	0.088599	-0.002963	0.049254	0.177376	0.183861	0.131538	0.110518	0.174076	0.058293	0.322661	0.135216	0.288726	0.144135	0.03927	0.092988	0.041061	0.053704	-0.082006	-0.035239	-0.102795	-0.079534	-0.114803	0.002753	-0.061253	-0.036045	-0.032457	0.056846	0.013602	-0.007283	0.009013	0.085519	-0.134317	-0.083279
chr3L_15503991_15504231	chr3L_15503991_15504231	3	0.073302	0.030303	0.129539	0.058403	0.104534	0.031381	0.051391	0.044057	0.009919	0.049456	-0.002158	0.07808	0.077302	0.052337	-0.012327	0.066354	0.010464	0.096465	0.074203	0.049139	-0.003448	0.146856	0.053801	0.158586	-0.002799	-0.005423	0.035177	0.069352	0.054671	-0.006604	0.042152	0.222763	0.250297	0.030814	0.076094	0.117169	0.030189	0.036577	0.043877	0.021325	0.060173	0.005475	0.10847	0.004514	-0.026526	-0.171777	0.826129
chr3L_15507493_15507892	chr3L_15507493_15507892	3	-0.09406	-0.232708	0.1227	-0.095219	0.241112	0.167325	0.052316	0.135668	0.159689	0.064627	0.057057	0.062407	0.113044	0.109776	-0.000249	0.056434	0.056402	0.051914	0.138259	0.167891	0.130738	0.129461	-0.003404	0.294021	0.109691	0.155441	0.131466	0.029695	0.039285	0.014088	0.016812	0.11205	0.013232	-0.115849	-0.04099	-0.09404	0.00621	-0.018639	-0.046448	0.081058	0.050631	-0.009002	-0.036476	0.006869	0.014735	-0.317454	0.227385
chr3L_15525390_15525831	chr3L_15525390_15525831	3	-0.258037	-0.126375	-0.06298	-0.075568	-0.131521	-0.002241	0.084329	0.234129	0.139402	0.19062	0.118274	0.086007	0.005419	-0.025043	0.20176	0.054762	0.093947	0.194438	0.176707	0.074353	0.046262	0.255766	0.019982	0.273211	0.240428	0.217066	0.169127	0.056682	0.056321	0.012678	-0.000135	-0.090633	-0.134454	-0.101689	-0.078488	-0.066095	-0.000441	-0.043211	-0.045431	-0.051163	-0.024974	-0.002824	-0.069654	0.040168	0.080957	-0.089528	0.020559
chr3L_15528320_15528560	chr3L_15528320_15528560	3	-0.471783	-0.146667	-0.053384	0.16545	0.120226	0.142163	0.236623	0.095967	0.022796	0.005201	0.078008	0.044119	0.045617	-0.003089	0.101347	0.050483	0.132738	0.121338	0.130592	0.035178	0.090665	-0.046836	0.070846	0.026275	0.280429	0.086606	0.119731	0.042736	0.054775	-0.018439	0.028461	-0.117751	-0.09766	-0.224176	-0.151028	-0.057511	0.007442	-0.086836	-0.039523	0.087016	0.042305	0.013834	0.089715	0.014216	-0.118547	-0.284361	1.41749
chr3L_15619167_15619475	chr3L_15619167_15619475	3	-0.041967	-0.083043	-0.052383	-0.099651	-0.018546	0.000608	-0.052341	0.092871	-0.058552	-0.0794	0.039937	0.347082	0.094521	0.124613	0.014995	-0.013234	0.075042	0.045463	0.122683	0.110278	0.062606	-0.001024	-0.030396	0.230914	0.105884	0.142836	0.114036	0.047341	0.088228	0.016849	0.084768	0.031434	0.005931	-0.172211	-0.024874	-0.181498	0.003922	-0.034837	-0.043341	-0.028596	-0.045308	0.048593	0.062344	-0.029721	0.136675	0.140173	-0.113603
chr3L_1586431_1586778	chr3L_1586431_1586778	3	-0.028195	0.04717	0.05661	0.066377	0.010808	0.022294	0.042715	0.075955	0.077077	-0.02006	0.050547	0.048476	0.004742	-0.027463	0.011999	0.039397	-0.019356	0.046347	0.106785	0.071576	0.006206	0.078773	0.063455	0.131518	0.0058	-0.024439	0.02294	0.010459	0.04333	0.025611	-0.007854	0.056615	0.027524	-0.040182	0.037577	0.11816	0.032245	-0.004113	0.042214	-0.001616	-0.025815	-0.026513	0.027885	-0.00579	0.058962	0.050044	0.582241
chr3L_15981414_15981688	chr3L_15981414_15981688	3	-0.122705	-0.163318	-0.16362	0.256828	0.317319	0.258902	0.334651	0.269959	0.183682	0.049343	0.286177	0.695025	0.348386	0.291262	0.327634	0.047726	0.245798	0.092661	0.151497	0.23723	0.118399	0.109311	0.143472	0.004509	-0.008144	0.185736	0.138476	0.044971	0.047515	0.028714	0.026424	0.429574	0.024246	-0.042405	-0.006245	0.04799	-0.002948	-0.023236	0.058111	0.067329	-0.002182	-0.037142	0.225468	0.068505	0.177125	0.098336	1.77105
chr3L_16053694_16054059	chr3L_16053694_16054059	3	-0.028078	-0.246926	0.344589	0.468442	0.402848	0.152497	0.1612	0.111637	-0.004214	0.101712	0.044855	0.060964	0.024445	0.002428	0.173755	0.127797	0.146716	0.164448	0.057553	0.134106	0.225635	0.05334	0.186889	0.315797	0.155394	0.099892	0.043971	0.044758	0.026619	0.002643	-0.01096	-0.205174	-0.105142	-0.018472	0.32804	-0.036282	0.015923	-0.001758	-0.073933	0.09363	0.017228	-0.0072	0.096304	0.025227	-0.084222	-0.261311	0.181627
chr3L_16054238_16054794	chr3L_16054238_16054794	3	-0.1056	-0.331669	0.374907	0.396374	0.336406	0.021309	0.088246	0.195999	-0.02888	0.100689	0.041516	0.033702	0.001592	-0.023788	0.222819	0.11914	0.11218	0.194332	0.107761	0.22793	0.145354	0.082499	0.018833	0.427841	0.08901	0.122269	0.098113	0.0213	-0.049342	-0.009056	-0.012548	-0.119605	-0.00968	0.025786	0.210825	0.027364	0.038466	-0.038576	0.010265	-0.023096	-0.029031	-0.035281	0.059216	-0.042278	0.370517	0.216705	0.078266
chr3L_16151333_16151549	chr3L_16151333_16151549	3	-0.348643	-0.116326	0.01434	0.169455	0.108938	0.154925	0.229525	0.179082	0.17868	0.115253	0.272492	0.034962	0.115769	0.042555	0.108006	0.20009	0.151357	0.16594	0.079118	0.051361	0.077326	0.215186	0.226963	0.152957	0.19996	0.195973	0.179529	0.070117	0.196958	0.043036	0.061105	-0.199815	-0.071399	0.023383	-0.177462	0.100481	0.001588	0.015969	0.020274	0.110495	-0.017529	0.052247	-0.029799	-0.018146	0.178222	-0.019987	-0.503355
chr3L_16403447_16403887	chr3L_16403447_16403887	3	-0.03501	-0.009327	0.321621	0.15576	0.113359	0.082849	0.088791	0.143305	0.282779	0.138318	0.046427	0.156999	0.100635	0.058599	0.324112	0.10046	0.09871	0.054889	0.0513	0.080396	0.095573	0.140746	-0.006237	0.289467	0.042838	0.151248	0.121641	0.036272	-0.034895	0.037848	-0.08486	0.194081	-0.012796	0.137443	0.202162	0.180106	0.031801	0.016644	0.072955	-0.025055	0.016328	0.036125	0.067934	0.063724	0.040134	0.151217	1.84647
chr3L_16696230_16696406	chr3L_16696230_16696406	3	-0.092575	-0.269077	0.601876	0.605836	0.552994	0.029834	0.174094	0.214751	0.008608	0.193401	-0.017473	-0.055265	-0.004754	-0.054523	0.074639	0.104741	0.013314	-0.005935	0.101909	0.063439	0.098746	0.081671	0.013592	0.29606	-0.014488	0.016863	0.038114	-0.000524	-0.108284	-0.01688	-0.035969	-0.23895	-0.149251	0.198457	0.251134	-0.236615	0.024052	-0.01625	-0.113059	-0.038155	-0.010257	-0.045566	-0.042136	-0.02672	0.182841	-0.231994	-0.323195
chr3L_16799408_16799956	chr3L_16799408_16799956	3	-0.179317	-0.202439	0.113726	0.201114	0.25533	0.196359	0.147045	0.213672	0.110237	0.123899	0.134732	0.127706	0.116985	-0.013596	0.329987	0.156601	0.157892	0.187705	0.169873	0.252953	0.165127	0.231391	0.27873	0.138332	0.170543	0.176501	0.136233	0.03533	0.157684	-0.038307	-0.005838	-0.021011	0.039534	0.028639	-0.028742	0.193579	-0.000828	-0.005116	0.057153	0.098835	0.02346	0.004086	0.05273	0.160552	0.097174	-0.105508	1.31952
chr3L_16800168_16801055	chr3L_16800168_16801055	3	-0.116446	-0.246441	0.112909	0.248589	0.238618	0.191413	0.439559	0.22494	0.150833	0.086266	0.102823	0.404387	0.204509	0.337694	0.247922	0.180866	0.137649	0.125605	0.208933	0.163581	0.080445	0.168388	0.172191	0.214626	0.079452	0.140733	0.132686	0.061425	0.023157	-0.011123	0.034897	0.178782	-0.028108	-0.075145	-0.09691	-0.110391	0.011048	-0.03994	-0.018956	0.020961	0.097423	0.011118	0.017542	0.070524	0.0451	-0.338994	1.9655
chr3L_1692417_1692776	chr3L_1692417_1692776	3	0.320211	0.422283	-0.057918	-0.019327	-0.047397	0.043965	0.087093	0.019311	-0.013415	-0.043974	-0.032869	0.004981	-0.0284	-0.034805	0.217364	0.027193	0.030938	0.059565	0.041436	0.125122	-0.014674	0.033007	0.00158	0.145129	0.047515	-0.012286	0.026949	0.010838	0.020397	0.068218	0.02688	-0.023334	-0.059245	0.250351	0.108243	0.123185	0.026281	0.090017	0.12157	0.037663	0.021633	0.008643	-0.065446	0.06574	0.346191	0.488908	-0.012213
chr3L_16962780_16963297	chr3L_16962780_16963297	3	-0.03503	0.157748	0.016957	0.048677	0.169019	0.051268	0.197738	0.13395	0.105528	-0.035739	0.085123	0.073818	0.059481	0.14414	0.08313	0.015452	0.140609	0.11654	0.140014	0.098597	0.1026	0.199671	0.165661	0.079192	0.155919	0.134125	0.081023	0.135685	0.084656	0.056887	0.058933	0.091281	0.003308	0.042546	-0.050314	0.096299	0.016337	0.013614	0.055309	0.020319	0.099253	0.020866	0.085498	0.063698	0.265608	0.257444	0.450226
chr3L_16993390_16993684	chr3L_16993390_16993684	3	-0.251128	-0.202994	0.099731	0.100368	0.097308	0.112138	0.087492	0.196437	-0.007049	0.080085	0.083504	-0.002302	0.021539	0.008949	0.028203	0.031126	0.074149	0.106597	0.223267	0.173486	0.180466	0.135169	0.238058	0.189512	0.059256	0.131697	0.132497	0.073815	0.029066	0.051711	-0.042824	-0.198098	0.004258	-0.084323	-0.052968	0.048807	0.003162	-0.034813	-0.0052	0.025697	0.100443	-0.031409	-0.025505	0.037037	-0.032085	-0.249262	0.02634
chr3L_17000361_17000564	chr3L_17000361_17000564	3	-0.414102	-0.2453	0.21827	0.035056	0.161909	0.094714	0.052622	0.16047	0.073841	0.160283	0.071921	0.030767	0.04131	0.01101	0.229094	0.078676	0.149746	0.19174	0.255459	0.313262	0.133473	0.285688	-0.004923	0.373332	0.205341	0.155002	0.124366	0.125535	0.153224	-0.001261	0.037172	-0.278992	-0.165269	-0.177437	-0.297933	-0.268353	0.012519	-0.007688	0.033658	-0.023554	0.035091	0.027312	0.016787	0.017386	0.346262	0.028054	0.227529
chr3L_17003095_17003715	chr3L_17003095_17003715	3	-0.104693	-0.051529	0.073423	0.059735	0.041047	0.128831	0.091473	0.049144	0.094751	0.085076	0.26139	0.107686	0.110701	0.031058	0.219506	0.077702	0.078404	0.167641	0.098078	0.049178	0.092004	0.18778	0.09184	0.24291	0.157533	0.240642	0.123491	0.079891	0.050765	0.036842	-0.000343	0.024234	0.060423	0.056938	-0.002148	0.183511	0.003201	-0.007124	0.108434	-0.045779	0.06322	0.060223	0.118003	0.061684	0.12738	-0.012683	0.247578
chr3L_17414458_17414799	chr3L_17414458_17414799	3	0.020795	-0.085359	0.058706	0.079779	0.035086	-0.009765	0.11339	0.07969	-0.003851	0.045545	0.10186	0.072429	0.031973	-0.008408	0.053943	0.070322	0.093992	0.05837	0.071356	0.005559	0.051061	0.164482	0.082048	0.192479	0.079099	0.151786	0.074081	0.038113	-0.059505	0.022067	0.018657	-0.022332	0.174766	0.022218	0.10042	0.168225	0.014156	0.00597	0.066734	0.013906	0.078716	-0.012451	0.093204	0.002955	0.038105	0.024143	0.169931
chr3L_17480060_17480778	chr3L_17480060_17480778	3	-0.252975	-0.016774	0.015922	0.026517	-0.033717	0.141446	0.283415	0.0944	0.05518	0.023622	0.114344	0.07889	0.129871	0.11128	0.01693	0.182756	0.109005	0.172873	0.253686	0.103279	0.122906	0.149869	0.252674	0.114616	0.431044	0.17713	0.16981	0.126127	0.110812	0.052028	0.13879	-0.063749	-0.051358	-0.019218	-0.107216	0.096007	0.008158	0.014433	0.062717	0.020163	-0.016946	0.084452	-0.038706	0.071341	0.122108	0.00723	0.201752
chr3L_17556721_17557242	chr3L_17556721_17557242	3	-0.045705	0.154465	0.063872	-0.018142	0.094006	-0.022369	-0.033143	0.152088	0.057122	0.028661	0.071774	0.063567	0.107728	0.088774	0.0463	0.107195	0.113881	0.101605	0.091555	0.002534	0.063364	0.097748	0.075631	0.202297	0.111148	0.196177	0.129168	0.066083	0.152108	0.083771	0.022939	-0.100538	0.032836	-0.013829	0.103223	0.026531	0.013043	-0.003771	0.007871	-0.044446	0.06975	0.132158	0.052341	0.058518	0.023356	0.064315	-0.280695
chr3L_17563002_17563653	chr3L_17563002_17563653	3	-0.387583	-0.170128	0.040182	-0.133448	-0.042632	0.097516	0.041655	0.166726	0.030873	0.036814	0.059955	0.016684	0.079002	0.049164	0.077949	0.066483	0.109644	0.163492	0.132353	0.233719	0.095817	0.132388	0.098003	0.221815	0.214023	0.338911	0.251266	0.045592	0.069619	0.007113	0.033286	-0.126441	-0.133147	-0.051808	0.00699	0.00739	-0.000589	-0.047527	0.014314	0.045003	0.017433	0.056889	-0.016781	0.075744	0.073313	-0.065303	-0.100756
chr3L_17569393_17570101	chr3L_17569393_17570101	3	-0.176312	-0.036138	0.240908	0.039572	0.115448	0.211318	0.174793	0.241462	0.148198	0.191621	0.087735	0.045373	0.043742	0.056803	0.295578	0.182097	0.254584	0.151108	0.1846	0.163962	0.185255	0.13517	0.174487	0.297112	0.644441	0.106549	0.110264	0.028181	0.198199	0.053243	0.076833	-0.061522	-0.054987	0.055754	-0.027807	0.046101	0.023167	-0.002367	0.002608	0.020498	0.034379	0.091943	-0.007015	0.148065	0.392448	0.390924	0.610495
chr3L_17572784_17573117	chr3L_17572784_17573117	3	-0.073493	-0.125011	-0.009902	-0.092058	-0.135136	-0.037358	0.058753	0.085484	-0.034628	0.041687	0.107004	0.073393	0.369191	0.431583	0.036631	0.146602	0.104008	0.17852	0.237862	0.222387	0.147491	0.179534	0.064447	0.270119	0.220284	0.196037	0.143505	0.103662	0.108163	-0.00763	0.014073	-0.014405	-0.057567	0.026504	0.010977	-0.015047	0.004409	-0.001651	-0.012558	-0.00416	0.090575	0.078495	0.081589	0.08757	0.270057	0.148741	-0.038397
chr3L_17573355_17573590	chr3L_17573355_17573590	3	-0.073453	-0.218358	0.235862	-0.070246	0.133889	0.160411	0.137988	0.201321	0.016691	0.081098	-0.027628	-0.001707	-0.01764	0.010022	-0.136856	0.09493	0.085175	0.102551	0.088242	0.189847	0.084513	0.079229	0.045035	0.469558	0.101082	0.06303	0.057479	0.004665	-0.012303	-0.016866	-0.036119	-0.152024	-0.055268	-0.011414	0.018091	-0.029835	0.034909	0.006374	-0.050933	0.019741	0.03038	-0.117107	-0.145525	0.019388	0.012363	-0.12898	-0.079437
chr3L_17583448_17584303	chr3L_17583448_17584303	3	-0.058552	0.029017	0.117259	-0.040867	0.084851	0.058019	0.082174	0.068066	-0.0024	0.014409	0.019838	0.017801	0.036207	0.035544	0.076969	0.10492	0.043101	0.048772	0.152117	0.085216	0.101325	0.067151	-0.044929	0.285016	0.246531	0.155228	0.129476	0.032763	0.167226	0.056133	0.088676	-0.111895	0.045357	0.019252	-0.026841	0.197198	0.030082	0.026182	0.090367	0.059913	0.018472	0.040749	0.028029	0.010492	0.15885	0.079536	-0.179558
chr3L_17599922_17600249	chr3L_17599922_17600249	3	-0.058841	-0.290468	0.118278	-0.048169	0.062441	-0.025158	-0.025792	0.157838	-0.034554	0.057848	0.044493	0.017207	0.023027	-0.008344	-0.075477	0.069243	-0.026307	0.065847	0.124457	0.027864	0.008691	0.042206	-0.139464	0.322597	0.104498	0.129483	0.104681	0.002607	-0.04424	0.018006	-0.025292	-0.103677	-0.077266	-0.133089	0.00638	-0.159458	0.021145	-0.08612	-0.052768	0.00949	-0.045859	0.001652	-0.073205	0.000875	-0.056755	-0.20299	-0.569813
chr3L_17609822_17610463	chr3L_17609822_17610463	3	-0.156681	-0.313392	0.058682	0.006098	0.23527	0.005263	0.051309	0.068004	-0.108624	-0.019987	0.157782	0.025053	0.023295	0.040328	-0.004333	0.091068	0.14511	0.143321	0.173057	0.217858	0.007017	0.136101	0.135662	0.279957	0.152279	0.215603	0.179567	0.057005	0.023316	0.053943	0.004476	0.006773	0.029901	0.003704	0.031342	0.160655	0.02045	-0.013962	0.019772	0.004924	0.038526	-0.003425	-0.012327	0.042336	0.09944	-0.080002	-0.350191
chr3L_17612398_17612642	chr3L_17612398_17612642	3	-0.020356	-0.053858	0.247911	-0.057389	0.226559	0.055675	0.041332	0.008681	-0.054458	0.0006	0.02107	0.030618	0.042341	-0.008921	0.08373	-0.012505	0.040616	0.047133	0.114128	0.028432	0.048887	0.110367	0.104597	0.282407	0.111283	0.040239	0.037755	0.03503	0.081539	0.005616	0.078991	0.030775	0.085209	-0.034751	-0.001505	0.044669	0.031998	-0.015824	0.004599	0.000533	0.028578	0.004996	0.08318	0.066969	0.104459	0.105295	0.093935
chr3L_17733548_17733753	chr3L_17733548_17733753	3	-0.200566	-0.074652	-0.129689	-0.15459	0.194729	-0.044791	0.049987	0.047761	-0.1234	-0.055217	0.555021	0.00237	0.067489	0.158298	-0.010823	0.039298	-0.014974	0.072072	0.03957	0.035864	0.021858	0.011019	0.120593	0.167211	0.03151	0.097074	0.087538	0.065823	0.011049	0.068667	-0.013812	-0.000924	-0.105903	-0.07609	0.06448	0.095246	0.00156	-0.033492	0.010026	-0.009314	0.090976	0.205182	-0.088579	-0.011362	-0.040002	-0.177237	-0.212267
chr3L_17850327_17850638	chr3L_17850327_17850638	3	-0.209241	-0.327215	-0.110925	-0.097682	-0.053348	0.143265	0.071298	0.100319	0.138624	0.016512	0.233076	0.369067	0.410417	0.469831	0.293924	0.0898	0.282765	0.259853	0.11963	0.250663	0.31267	0.261929	0.308194	0.10276	0.164687	0.245526	0.187249	0.073822	0.134851	-0.048635	0.021362	0.207554	0.022008	-0.259809	-0.219253	-0.037677	-0.008144	-0.085317	-0.038571	0.086882	0.286106	0.421853	0.240524	0.084451	-0.229861	-0.384141	-0.163681
chr3L_17872006_17872370	chr3L_17872006_17872370	3	0.010575	-0.163087	0.049681	-0.0525	-0.041443	-0.066106	0.04355	0.018255	-0.069751	0.016952	0.124006	0.01865	0.344074	0.462646	0.101242	0.026673	0.068088	0.088025	0.019898	-0.023968	0.134675	0.048565	0.00131	0.291222	0.138755	0.022223	-0.022339	0.037885	-0.059218	-0.020765	-0.026125	0.003765	-0.067353	-0.097358	0.023906	0.110384	0.007251	-0.024762	-0.013922	-0.031313	0.421568	0.637181	-0.006797	-0.03929	-0.130818	-0.232406	-0.181035
chr3L_17906329_17906577	chr3L_17906329_17906577	3	-0.303283	-0.220518	0.059408	-0.060441	0.017487	0.027519	0.267789	0.37263	0.144321	0.158641	0.252795	0.24617	0.161627	0.18819	0.104806	0.056409	0.127557	0.115404	0.126926	0.038954	-0.041114	0.126925	0.008931	0.29174	0.164945	0.252805	0.17297	0.038612	0.105485	-0.013662	0.017361	-0.08857	-0.009927	0.00942	-0.207533	0.034094	-0.004192	-0.000361	0.070181	-0.097401	-0.002472	-0.01827	-0.017752	0.008282	0.157676	0.008373	0.532049
chr3L_17954724_17955671	chr3L_17954724_17955671	3	0.014045	-0.143397	0.140058	0.342063	0.224114	0.305452	0.420814	0.08618	-0.001586	0.030234	0.061402	0.055838	0.224695	0.115852	0.08565	0.213114	0.172522	0.104906	0.168555	0.220507	0.059449	0.145177	0.060257	0.077143	0.179396	0.093622	0.094786	0.106508	0.037529	-0.03481	-0.033613	-0.030111	0.002908	-0.099036	0.016238	0.077544	0.004459	0.019167	-0.003885	0.020818	0.073991	-0.021528	0.015556	0.016281	0.342776	-0.127333	0.793504
chr3L_17964099_17964589	chr3L_17964099_17964589	3	-0.159142	0.250166	0.130382	0.028571	0.258794	0.016974	0.002188	0.021334	0.002194	-0.052431	0.04205	0.086798	0.042242	0.051261	0.039307	0.045746	0.080715	0.121413	0.16515	0.121198	0.10971	0.098927	0.175671	0.277399	0.310164	0.091226	0.1261	0.131415	0.285171	0.089104	0.009507	-0.144387	-0.032248	0.080767	0.091842	0.10026	0.032041	0.038451	0.08822	0.027331	0.050244	0.091234	0.032627	0.096888	0.243225	0.14636	-0.222424
chr3L_17965556_17965888	chr3L_17965556_17965888	3	0.07486	0.082768	0.118357	0.071806	0.237469	0.002443	-0.020574	0.010534	-0.0286	-0.009579	-0.005985	0.010253	-0.062502	0.066111	-0.036488	0.050242	0.01865	0.035617	0.019616	0.020104	0.034206	0.157179	-0.038718	0.265027	0.09447	0.049857	0.049521	0.012142	0.024834	0.036654	0.016627	-0.01437	0.039083	-0.085076	0.092322	0.077149	0.029017	0.017689	0.021472	-0.006254	-0.006164	0.030601	-0.092929	0.005792	0.17679	0.090823	0.021955
chr3L_17992484_17992772	chr3L_17992484_17992772	3	-0.106344	-0.027725	0.053835	-0.061822	0.146283	-0.000335	0.080657	0.025659	-0.0717	-0.048034	0.060993	0.043498	-0.014369	0.035444	0.240544	-0.019922	0.067973	0.141499	0.092982	0.091139	0.052623	0.129215	0.009326	0.15497	0.054475	0.089011	0.057378	0.067012	0.058796	0.032232	0.068838	-0.047674	0.046614	-0.029452	-0.011633	0.107303	0.014242	0.024709	0.073342	0.035188	0.07167	0.04186	-0.005118	0.057428	0.104947	0.04527	0.442143
chr3L_17994693_17994874	chr3L_17994693_17994874	3	-0.258628	-0.122878	0.06102	-0.11573	0.105701	0.173408	0.095601	0.139509	0.039483	0.114369	0.040025	0.003668	0.010082	-0.049056	0.083068	0.025296	0.086087	0.160795	0.193886	0.220853	0.202821	0.03734	-0.034433	0.260147	0.22427	0.169852	0.131394	0.06287	0.197082	-0.013681	0.072757	-0.082875	0.075262	-0.128427	-0.081131	-0.061875	0.01029	-0.012786	-0.02653	-0.013077	0.075057	-0.027212	-0.080218	-0.036068	0.273665	-0.073973	-0.500617
chr3L_17996303_17996608	chr3L_17996303_17996608	3	-0.1049	-0.067419	-0.04266	0.039683	0.173858	0.096381	0.037549	0.194035	0.020267	0.135078	0.098316	-0.010635	0.064242	0.104843	0.161986	0.056283	-0.025221	0.130124	0.084659	0.08082	0.041855	0.174026	0.093809	0.297664	0.036168	0.103279	0.090004	0.099568	0.123074	-0.006607	0.007244	-0.007721	0.16382	-0.064847	-0.002066	0.033519	0.008648	0.001473	0.032521	0.000182	0.064008	0.087525	-0.056096	0.036259	0.052681	-0.235789	0.015821
chr3L_18022573_18022976	chr3L_18022573_18022976	3	-0.182969	-0.194318	0.100334	-0.085953	0.029832	0.033881	-0.055591	0.000827	-0.098168	-0.005783	0.050627	-0.038568	0.061875	0.053299	0.071683	0.105233	0.095223	0.139209	0.152	0.046108	0.012052	0.09372	0.013234	0.205677	0.263741	0.147111	0.130839	0.045227	0.055795	0.044762	0.044329	-0.183124	-0.019211	-0.234381	0.03643	-0.199877	0.010286	-0.075467	-0.101835	-0.013963	0.050659	0.055959	-0.107102	0.031404	0.034319	-0.093209	-0.371874
chr3L_18056340_18056638	chr3L_18056340_18056638	3	-0.099563	-0.164451	0.091126	-0.039705	0.0118	0.000634	-0.030643	-0.024485	0.029304	-0.027615	0.08703	0.057673	0.044469	0.072704	0.070501	0.05039	-0.021052	0.053811	0.040673	-0.023255	-0.017011	0.180677	-0.112729	0.087806	0.040621	0.098189	0.030657	0.060175	-0.014918	-0.04204	-0.018972	-0.035005	0.018638	-0.128231	-0.007046	0.069398	0.013058	-0.02451	0.042524	-0.024724	0.032746	0.042369	-0.015961	0.005766	-0.077124	-0.29565	-0.439233
chr3L_18132233_18132583	chr3L_18132233_18132583	3	0.206534	0.105388	0.000652	0.061813	0.000987	-0.018802	0.031246	-0.041849	-0.029367	-0.025771	-0.009655	-0.005654	-0.033372	-0.010811	-0.039021	0.015579	0.01952	0.058076	0.021837	0.0568	-0.074475	0.13797	0.029823	0.011939	0.017597	-0.007125	-0.032631	0.028898	0.013118	0.043671	0.02211	-0.036093	0.001112	0.187451	0.065872	0.020416	0.012232	0.091744	0.031787	-0.014867	-0.003471	0.047704	-0.115967	0.076131	0.158104	0.13085	-0.589272
chr3L_18164058_18164369	chr3L_18164058_18164369	3	-0.167294	-0.203671	0.039607	-0.102079	-0.099452	0.040952	0.201415	0.340791	0.149624	0.155936	0.069335	0.01179	0.08153	0.11435	0.066053	0.052255	0.130289	0.158204	0.263114	0.229863	0.069331	0.145809	-0.002854	0.244206	0.171709	0.277601	0.163099	0.084123	0.050164	0.088381	0.005533	-0.154775	-0.084688	-0.034321	-0.062537	0.124043	0.007477	0.037918	0.067282	-0.020739	0.00937	0.001301	-0.012315	0.023419	0.095646	0.024716	-0.457163
chr3L_18227269_18227702	chr3L_18227269_18227702	3	0.087371	0.023221	0.062914	-0.143263	-0.047496	0.028756	-0.02098	0.078495	-0.066648	-0.000763	0.006221	0.035172	0.128139	0.107369	0.051681	-0.005769	0.068404	0.094175	0.097935	0.093389	0.110291	0.126069	0.024083	0.157548	0.0747	0.097896	0.074697	0.034918	0.041095	0.044835	0.05708	-0.092245	-0.12807	-0.057704	-0.010543	0.245099	0.004724	0.037181	0.09976	0.020412	-0.004383	0.002636	-0.075261	0.024502	0.158182	0.198874	-0.239026
chr3L_18236735_18237216	chr3L_18236735_18237216	3	-0.122352	-0.054374	-0.013367	-0.141664	-0.18208	0.047878	0.069321	-0.018471	-0.013275	0.01856	0.016464	0.001966	0.0076	-0.006676	0.240699	0.129539	0.051374	0.131792	0.105012	0.137302	0.067851	0.139779	0.107017	0.288431	0.179027	0.145953	0.113244	0.040533	0.112645	0.054173	0.085474	-0.143046	-0.140744	-0.003646	0.034593	-0.151217	0.002689	0.03963	-0.008709	-0.015152	0.025732	0.01323	-0.056917	-0.005065	0.259839	-0.058281	-0.37851
chr3L_18391447_18391822	chr3L_18391447_18391822	3	-0.069833	0.108419	0.365949	-0.09391	-0.057711	0.008821	0.093229	0.113662	0.021916	0.098502	0.064649	0.020728	0.026521	-0.025534	0.031289	0.228189	0.194205	0.061541	0.123748	0.096672	-0.093462	0.057554	0.158948	0.27434	0.268838	0.11307	0.042559	0.036102	0.114731	0.184594	0.203598	-0.127899	0.00545	0.06638	0.037625	-0.030703	0.016477	-0.009428	0.012078	-0.05558	0.014869	0.004268	-0.070204	0.032626	0.184538	0.1397	1.15434
chr3L_18395051_18395448	chr3L_18395051_18395448	3	-0.263025	-0.133161	0.392192	-0.086101	-0.038548	0.237674	0.120313	0.445284	0.296327	0.315769	0.025387	0.02909	0.005874	0.005811	0.08141	0.126536	0.283122	0.158412	0.227812	0.357618	0.274591	0.396922	0.269566	0.50096	0.225488	0.22126	0.134011	0.105568	0.155449	0.18086	0.073809	-0.115075	-0.138897	0.0508	-0.058718	-0.066815	0.02617	0.062149	0.356198	0.071673	0.00355	-0.032388	-0.053397	0.000135	0.160235	0.147764	-0.090181
chr3L_18395971_18396281	chr3L_18395971_18396281	3	-0.026401	-0.130423	0.141656	-0.029822	-0.008857	-0.037013	0.092081	0.28896	0.057883	0.132725	0.103539	-0.030175	0.031804	-0.001633	0.494749	0.131217	0.184921	0.10446	0.075517	0.138155	0.077682	0.107347	-0.027926	0.455462	0.169472	0.266127	0.101716	0.079471	0.157676	0.074553	0.037413	-0.121266	-0.089962	0.092318	0.07194	-0.004476	0.020341	0.032839	0.149671	0.02434	0.036592	-0.003335	-0.040356	-0.007028	0.053285	0.030956	-0.062059
chr3L_18752063_18752762	chr3L_18752063_18752762	3	-0.235383	-0.135581	0.250437	-0.080874	0.153929	0.001703	-0.031021	0.121978	-0.044231	-0.033835	0.108771	-0.036886	0.031529	0.06109	0.042599	0.153686	0.117603	0.102564	0.094029	0.065818	0.016883	0.080097	0.13023	0.452224	0.482226	0.202758	0.20254	0.027712	0.153062	0.023429	0.08048	-0.216621	-0.039038	-0.059135	-0.000326	-0.009839	0.009941	-0.021393	0.023714	-0.03398	0.098199	0.029565	0.020249	0.03624	0.075093	-0.143583	-0.371939
chr3L_18758784_18759202	chr3L_18758784_18759202	3	-0.112402	0.022758	0.208774	0.058422	0.085508	0.05142	0.001526	0.027375	-0.093257	-0.027361	0.067314	0.017632	0.004215	0.037871	0.143142	0.03707	-0.02691	0.032757	0.177535	0.039403	0.000796	0.198912	0.094362	0.220897	0.616819	0.096295	0.118053	0.06543	0.110383	0.096607	0.114867	-0.078783	-0.012018	0.054444	0.036542	-0.043963	0.012788	0.030334	0.011188	0.011	0.053509	0.011819	-0.068229	0.009896	0.094727	0.105667	-0.306708
chr3L_18764162_18765079	chr3L_18764162_18765079	3	-0.088632	0.00156	0.349009	0.027177	0.433557	0.147848	0.031249	0.105701	0.021515	0.007285	0.06158	-0.007044	0.029948	0.036938	0.105828	0.095852	0.155679	0.123426	0.125237	0.167123	0.124821	0.318742	0.094424	0.448909	0.4741	0.166908	0.138237	0.044987	0.143255	0.0519	0.095416	-0.024017	0.016978	0.004092	0.02985	0.075995	0.017657	0.008109	0.038668	0.081702	0.009176	0.04309	-0.021354	0.081406	0.223249	0.052874	-0.210777
chr3L_18833557_18833789	chr3L_18833557_18833789	3	-0.148484	-0.143005	-0.031043	0.106152	0.066349	0.043254	0.085681	0.008913	0.12037	-0.008723	0.435498	0.253142	0.084731	0.044025	0.110179	0.086067	0.127833	0.105485	0.059061	0.048639	0.051315	0.144684	-0.011243	0.028388	0.044899	0.112118	0.045333	0.068882	0.070176	0.002576	-0.003945	0.093624	-0.020753	-0.081955	-0.019537	0.003578	0.006929	-0.009464	0.049606	-0.02487	-0.012618	0.056408	0.013525	0.004829	0.044001	0.007206	1.0972
chr3L_18860760_18860970	chr3L_18860760_18860970	3	-0.037112	-0.140879	-0.017136	0.018458	0.195158	-0.029432	0.059007	0.004398	0.156333	-0.050465	0.034319	0.207702	0.00682	-0.003388	0.188365	0.015368	0.091489	0.037367	0.008644	0.011284	-0.027982	0.20751	-0.092723	0.028333	0.010522	0.025797	0.053004	0.006883	0.041509	0.028336	-0.053208	0.266655	0.166888	-0.124157	-0.187985	0.078213	0.024634	-0.023141	0.051928	-0.021065	-0.042618	-0.005832	0.107518	-0.02412	-0.037501	-0.111978	1.71195
chr3L_18881210_18881511	chr3L_18881210_18881511	3	-0.03607	-0.247475	0.215208	0.141473	0.395895	0.070153	0.130036	0.249098	0.075472	0.1268	0.015715	-0.041487	-0.004873	-0.006019	0.17321	-0.025012	0.060843	0.069948	0.048373	0.02509	0.095713	0.156776	0.008132	0.234969	0.024276	0.077684	0.050272	0.007675	-0.001615	-0.050701	-0.055405	0.125875	0.009038	-0.021256	-0.008445	-0.042492	0.009056	-0.038893	0.120999	0.044861	-0.0093	-0.039562	0.047292	0.005648	-0.165684	-0.38387	0.126899
chr3L_18882456_18882640	chr3L_18882456_18882640	3	-0.191576	-0.23318	0.300695	0.092934	0.125326	0.019666	0.0328	0.07701	0.042163	0.131861	0.039567	0.058183	0.04145	0.068818	0.185644	0.082384	0.002644	0.070611	0.054593	-0.013206	0.015267	0.19992	0.106806	0.262073	0.036158	0.121223	0.021699	0.033056	-0.025516	0.002938	-0.012198	0.042073	-0.103539	-0.033302	0.00096	-0.007658	0.005836	-0.052065	0.140947	-0.00143	-0.024958	-0.001675	-0.034879	0.001559	0.040493	-0.06283	0.738027
chr3L_18884043_18884311	chr3L_18884043_18884311	3	0.006245	-0.17519	0.133148	-0.050486	-0.054206	-0.035776	-0.004455	0.022422	-0.089999	-0.000943	0.090873	0.017825	0.134226	0.133994	0.242305	0.055577	0.015074	0.052354	0.092837	-0.009441	-0.003441	0.175511	0.035806	0.335058	0.002549	0.076724	0.091106	0.020587	-0.005772	-0.029252	-0.016652	0.042779	-0.011994	0.0008	0.063764	0.060387	0.009991	0.006433	-0.009884	-0.014234	0.07046	0.092126	0.054523	0.019935	0.114909	-0.041947	0.137459
chr3L_18989619_18989874	chr3L_18989619_18989874	3	-0.341996	-0.084639	0.037433	-0.184904	-0.053079	0.066316	0.151268	0.145586	0.116753	0.063171	0.096239	0.10712	0.293052	0.240893	0.281314	0.077331	0.114489	0.192011	0.190797	0.250244	0.169028	0.227895	-0.09798	0.322152	0.143437	0.222094	0.1453	0.073517	0.044825	0.048782	0.071574	-0.042472	-0.138547	-0.022567	-0.106488	0.099817	0.012035	-0.010324	0.10111	0.018276	0.140331	0.013018	0.088266	0.220806	0.306614	0.127509	0.21883
chr3L_19038499_19038664	chr3L_19038499_19038664	3	-0.13889	-0.174878	-0.046782	-0.032095	0.014057	0.052162	0.028277	-0.002176	-0.120196	-0.04466	-0.048232	0.000853	-0.016563	-0.049463	0.059444	0.045207	-0.003557	0.059116	0.061353	0.08889	0.010779	0.072424	0.10078	0.139205	-0.002087	0.050825	-0.030289	-0.037815	-0.065377	0.028011	-0.071602	-0.053517	-0.037661	-0.135778	-0.05307	0.226238	-0.003677	0.014795	0.035812	0.051203	-0.034232	-0.046826	-0.081887	-0.023184	-0.027908	-0.113094	0.587151
chr3L_19074456_19074784	chr3L_19074456_19074784	3	-0.272285	0.107382	0.293048	0.342702	0.137067	-0.012991	0.100513	0.089398	0.049996	0.103858	0.045084	0.008661	0.143532	0.270203	0.054092	0.118559	0.301966	0.123631	0.117082	0.096978	0.091062	0.120576	0.022863	0.055658	0.078837	0.102788	0.097665	0.054233	0.129482	-0.005909	0.018546	-0.105347	-0.004859	-0.028671	-0.034136	0.083195	0.017356	0.029925	0.124392	-0.005757	0.048824	0.046032	0.073873	0.100508	0.389416	0.135591	1.01973
chr3L_19084662_19085070	chr3L_19084662_19085070	3	0.002919	-0.052864	0.189557	0.059289	0.10368	0.018235	0.069096	0.288251	0.144174	0.140494	0.051083	0.162132	0.177471	0.190297	0.08703	0.175207	0.102365	0.07757	0.169214	-0.045271	0.015892	0.211621	0.077048	0.347856	0.115646	0.237701	0.169703	0.02424	0.049639	0.019643	0.029337	0.069263	0.060851	-0.055239	-0.035571	-0.031717	0.025833	-0.013739	0.032844	0.001875	-0.048447	0.052468	0.073508	0.045156	0.106812	-0.011818	-0.11989
chr3L_19163643_19163896	chr3L_19163643_19163896	3	-0.005617	0.055348	-0.057366	0.013243	0.10726	0.020025	-0.000768	0.023325	0.016257	-0.032024	0.053738	0.091374	0.016101	0.018068	0.019653	0.04081	0.167959	0.024	0.089187	0.355974	-0.017755	0.040755	0.073509	0.186785	0.094954	0.018112	0.045445	0.098936	0.088153	0.079476	0.062098	-0.130622	-0.018445	-0.071948	-0.030845	-0.013196	0.014045	-0.03615	0.012477	-0.017141	-0.013532	0.042294	-0.047184	0.022864	-0.051475	-0.204962	0.163057
chr3L_19164781_19164986	chr3L_19164781_19164986	3	0.021556	0.342987	0.036505	-0.092578	0.056588	0.082838	0.072678	0.059981	-0.018384	-0.015024	0.005547	-0.031728	0.029159	-0.027381	0.029899	0.002285	0.039393	0.029307	0.003304	0.291832	0.034733	0.01415	-0.024231	0.328417	0.095097	0.053433	0.054146	0.038872	0.06824	0.09544	0.076173	-0.162377	-0.176924	0.147946	0.039009	0.139973	0.032965	0.084636	0.090957	-0.003935	0.015364	-0.03861	-0.031169	0.019568	0.158754	0.255997	-0.272428
chr3L_19285348_19286228	chr3L_19285348_19286228	3	0.159311	-0.035194	0.097949	0.082495	0.060486	0.06269	0.135132	0.111546	0.152594	0.076509	0.050371	0.22408	0.19024	0.096722	0.232425	0.086558	0.090167	0.092819	0.08813	0.031766	-0.00525	0.199164	0.13829	0.280292	0.122891	0.099822	0.055881	0.098077	0.110156	0.069544	0.017677	0.166506	0.19313	0.078152	0.101769	0.096763	0.019473	0.043669	0.084741	0.0383	0.031499	0.020766	0.108344	0.068818	0.079809	0.069772	0.276671
chr3L_19626060_19626356	chr3L_19626060_19626356	3	-0.18828	-0.100526	0.012377	0.044527	0.07067	0.093882	0.051445	0.05134	0.113785	0.010883	0.173109	0.236004	0.119592	0.10274	0.053735	0.076882	0.149807	0.138005	0.144952	0.103296	0.02134	0.002847	0.136163	0.05616	0.10047	0.183742	0.18174	0.086395	0.107317	0.038544	-0.010293	0.065659	0.058783	-0.198922	-0.160091	-0.001922	0.008958	-0.007845	-0.00803	0.030253	0.017696	0.037735	0.05548	0.075414	0.139719	-0.024037	0.638128
chr3L_19642718_19643162	chr3L_19642718_19643162	3	-0.0787	-0.08664	0.035831	0.037211	0.187149	-0.002804	0.131869	0.224875	0.200081	0.084127	0.107037	0.098672	0.219347	0.216574	0.033169	0.055994	0.134449	0.139094	0.049271	-0.007964	-0.083497	0.165721	-0.029687	0.210504	0.080577	0.088076	0.022683	0.062679	-0.035407	0.051929	-0.004452	0.116054	0.036623	0.026191	-0.049914	0.161203	0.024694	0.004926	0.077791	-0.026451	0.021561	0.047305	0.123787	0.037772	0.179155	0.144147	0.07155
chr3L_19784463_19785152	chr3L_19784463_19785152	3	-0.020744	0.079688	0.008334	0.089189	0.00578	0.170611	0.153367	0.114816	0.114282	0.052725	0.124479	0.223145	0.035715	0.062062	0.254309	0.044235	0.026604	0.153859	0.065556	0.019869	0.109817	0.201947	0.098788	0.146687	0.065757	0.097581	0.143345	0.084531	0.026282	0.045599	0.000935	0.03263	0.116605	0.105058	-0.008672	0.169212	0.018633	0.024744	0.090928	0.014478	0.017441	0.070801	0.005577	0.047256	0.231941	0.146794	-0.023782
chr3L_20394637_20395005	chr3L_20394637_20395005	3	-0.134806	-0.137717	0.032179	0.022712	-0.025928	0.08853	0.173231	0.053443	0.101861	-0.025682	0.212833	0.500109	0.237029	0.198441	0.167422	0.090427	0.018894	0.095738	0.100739	0.017013	0.080701	0.153337	-0.00748	0.121566	0.055267	0.251206	0.08421	0.048101	0.071694	0.006374	0.014778	0.213125	-0.019898	-0.16917	0.003386	0.117196	-0.005293	-0.035109	0.021407	0.021598	0.042503	0.046261	0.131932	0.007567	0.0005	-0.061727	1.26018
chr3L_20533346_20533680	chr3L_20533346_20533680	3	-0.349291	-0.242908	0.13287	-0.11651	0.000898	0.048345	0.03051	0.131107	-0.094379	-0.021923	0.435806	0.2322	0.19025	0.085216	0.095727	0.022037	0.085815	0.05868	0.121697	0.045763	0.059299	0.110892	0.152506	0.279092	0.042208	0.126421	0.081817	0.013586	-0.041182	0.000686	-0.022558	0.09064	-0.064331	-0.087385	0.095303	-0.073731	0.011086	-0.048078	-0.013503	0.049831	-0.003413	-0.029926	-0.015935	-0.034279	-0.104387	-0.138476	0.680902
chr3L_20723298_20723851	chr3L_20723298_20723851	3	-0.230045	-0.252531	-0.050486	-0.119445	0.000104	0.160901	0.2443	0.107512	-0.05332	0.01111	0.094284	0.029809	0.069261	0.112778	0.053974	0.055672	0.032233	0.077983	0.169157	0.169862	0.066119	0.094961	0.330636	0.221902	0.160493	0.181433	0.188219	0.104348	0.052933	0.053579	0.151563	-0.058627	-0.16557	-0.176399	-0.095723	-0.056231	0.023369	-0.100669	-0.041374	0.026296	0.019866	0.000811	-0.004213	0.012987	-0.048039	-0.104793	0.612705
chr3L_20942419_20943331	chr3L_20942419_20943331	3	-0.17299	-0.052691	0.097671	-0.085211	0.089127	0.031993	0.032575	0.128681	0.114733	0.011359	0.086613	0.192866	0.035539	0.068001	0.329126	0.084112	0.073767	0.124098	0.108481	0.149267	0.134032	0.136895	0.155698	0.32199	0.09679	0.112684	0.178018	0.065212	0.05446	0.053548	0.073112	0.100917	0.031075	-0.031284	-0.004786	0.188427	0.025459	0.003294	0.070407	0.068424	0.052595	0.055121	-0.004239	0.054457	0.195142	-0.002702	0.703249
chr3L_21002013_21002326	chr3L_21002013_21002326	3	-0.254499	-0.336404	0.011988	0.063618	0.184232	0.063529	-0.008928	0.148277	0.018778	-0.048683	0.069243	0.035333	0.047563	0.031596	0.025252	0.064298	0.127859	0.142037	0.078792	0.12927	0.037107	0.083046	0.036022	0.245072	0.104946	0.068126	0.011412	0.000516	0.044092	-0.032268	-0.013214	-0.108681	-0.049487	-0.164607	-0.090384	-0.071287	0.001228	-0.035312	-0.059523	0.021926	-0.041159	-0.012027	0.000893	0.067826	0.051087	-0.098041	-0.016974
chr3L_21004105_21004423	chr3L_21004105_21004423	3	-0.117203	-0.272016	0.164559	0.119073	0.269377	-0.008591	0.052681	0.065926	0.069241	0.041004	0.010105	0.10282	0.008691	-0.004992	0.098375	0.069247	0.105761	0.059195	0.055028	0.027283	0.020596	0.137596	0.086428	0.309687	-0.019037	0.13462	0.064219	0.035348	0.023337	0.032483	-0.056374	-0.055202	0.024808	0.078349	-0.00936	0.069049	-0.001066	0.021001	0.036268	0.007331	-0.010709	-0.025841	-0.025438	-0.037185	0.113901	-0.066156	0.116466
chr3L_21016520_21016860	chr3L_21016520_21016860	3	-0.550836	-0.141199	0.203191	0.188368	0.321424	0.153979	0.114168	0.133812	-0.063732	-0.028295	0.084219	0.017412	0.031025	-0.040885	0.058553	0.036574	0.2149	0.159348	0.182086	0.261754	0.212697	0.102852	0.036387	0.353711	0.253854	0.147979	0.095087	0.06328	0.168735	0.024818	0.073235	-0.316139	-0.174417	-0.043271	-0.214739	0.013009	0.007474	-0.011736	0.038006	0.040837	0.019555	-0.007652	-0.038807	0.027881	0.434251	0.240441	0.079313
chr3L_21019355_21019692	chr3L_21019355_21019692	3	-0.285071	-0.050905	-0.163524	0.000248	-0.029833	0.121591	0.144336	0.06269	-0.027826	-0.065891	0.143446	0.18372	0.095274	0.057993	0.014874	0.079188	0.393594	0.072539	0.138464	0.074624	0.120072	0.017083	0.025169	-0.006158	0.197592	0.181799	0.176474	0.030402	0.098015	0.036745	0.047951	-0.096464	-0.067705	-0.051163	-0.101205	0.013066	-0.010028	-0.023237	0.016699	0.056487	0.019619	0.025197	0.026092	0.076118	0.059877	-0.175512	1.36854
chr3L_21233055_21233570	chr3L_21233055_21233570	3	-0.047946	-0.045818	0.03751	-0.103622	0.077923	-0.009909	0.035567	0.026572	-0.064546	-0.002171	0.044792	-0.007872	0.021041	0.008758	0.098115	0.058855	0.054228	0.009501	0.076913	0.049956	0.008815	0.12116	0.031391	0.271413	0.592575	0.134945	0.051058	0.054478	0.099121	0.057508	-0.00307	-0.071003	-0.069781	0.066575	0.064869	0.171833	0.014806	0.014394	0.06318	0.058469	0.008955	0.008554	-0.048085	0.015395	0.205963	0.058807	0.230595
chr3L_21248703_21249184	chr3L_21248703_21249184	3	-0.166038	-0.227442	0.060408	-0.113253	-0.039005	0.223218	0.20138	0.2256	0.171962	0.121913	0.056326	0.025428	0.050947	0.002622	-0.055625	0.033335	0.093162	0.206832	0.216003	0.293453	0.139752	0.045886	0.032206	0.28295	0.210331	0.204103	0.165932	0.025105	0.18701	-0.002532	0.034176	-0.038159	-0.05781	0.031184	-0.052522	0.020015	0.024897	-0.028749	0.080207	0.033894	2.6e-05	0.002486	0.012418	0.064503	0.140403	-0.15108	0.070175
chr3L_21375062_21375769	chr3L_21375062_21375769	3	0.226877	-0.125454	0.221061	0.106431	0.164497	0.122451	0.164817	0.172349	0.074314	0.0486	0.086739	0.069564	0.02221	0.071105	0.300464	0.060231	0.055072	0.132959	0.046559	0.135542	0.044431	0.209634	0.294428	0.275551	0.101816	0.067198	0.037026	0.059343	0.030954	0.029447	0.020776	0.12914	-0.002109	0.030639	-0.039417	0.099005	0.01637	-0.017714	0.052052	0.077735	0.00162	-0.008395	0.015751	0.043274	-0.001922	-0.105411	0.79893
chr3L_2151523_2152250	chr3L_2151523_2152250	3	-0.037049	-0.062497	0.008141	0.008386	0.069365	0.121759	0.188218	0.180739	-0.003486	-0.004937	0.05079	0.029361	0.124663	0.137797	0.22521	0.076307	0.106782	0.134527	0.148702	0.167215	0.207084	0.130799	0.193702	0.380006	0.069763	0.206385	0.116342	0.072938	0.007755	0.002919	-0.040715	0.046168	-0.091401	-0.076153	0.129723	0.032865	0.013398	0.024243	0.023803	0.07983	0.116175	0.129435	-0.011523	0.009752	0.056515	-0.026461	-0.079215
chr3L_2170836_2171329	chr3L_2170836_2171329	3	-0.241724	-0.144777	0.000127	-0.037716	0.092	0.123016	0.279966	0.290978	0.230667	0.056934	0.035141	0.198409	0.177166	0.228616	0.038059	0.033008	0.082432	0.108545	0.681488	0.091678	-0.04416	0.075106	0.065836	0.123336	0.120275	0.094845	0.088097	-0.007611	0.07577	0.015875	0.027614	0.269893	0.183042	-0.103815	-0.139563	0.087016	0.022144	-0.02642	0.024747	0.029441	0.045221	0.005513	0.101102	-0.009265	-0.160654	-0.34643	1.02648
chr3L_21872472_21872794	chr3L_21872472_21872794	3	-0.41431	-0.042693	-0.061799	-0.045621	-0.011541	0.219199	0.312352	0.113756	0.104732	0.001776	0.236121	0.417843	0.185296	0.170648	0.113706	0.069096	0.1371	0.256199	0.119211	0.053717	0.105512	0.002938	0.122443	0.053967	0.126963	0.163637	0.116536	0.086078	0.061892	0.084351	0.042714	0.064376	-0.079313	-0.044823	-0.152684	-0.057098	0.019034	-0.038739	-0.000216	-0.04547	0.018289	0.024612	-0.001832	0.042625	0.064555	-0.028858	0.658787
chr3L_2192015_2192425	chr3L_2192015_2192425	3	0.014604	-0.260441	0.040487	-0.047282	0.064601	0.133075	0.147781	0.109859	0.041436	0.030656	0.070761	0.053304	0.054772	0.056923	0.042116	0.048513	0.041692	0.071184	0.202931	0.081638	0.087094	0.14686	0.273364	0.087834	0.149914	0.065888	0.030982	0.000957	0.019132	-0.019173	0.034442	0.039094	-0.050606	-0.049849	0.012985	0.153294	-0.003232	-0.01206	0.02627	0.067685	0.057084	0.00381	-0.021428	-0.00276	-0.065341	-0.221609	0.26723
chr3L_22174990_22175273	chr3L_22174990_22175273	3	-0.225057	-0.132596	-0.041809	-0.080663	0.006382	0.133471	0.116979	0.129089	-0.046384	-0.00203	0.091726	-0.050937	-0.051402	0.001675	0.094783	-0.005604	-0.011775	0.044844	0.12402	-0.013766	0.214705	0.178485	0.086006	0.234019	0.040234	0.105729	0.060732	0.084715	0.0296	0.003024	0.014894	0.035297	-0.064183	0.005758	0.019508	0.156179	0.011901	0.014154	0.022157	0.048132	0.024258	0.016296	-0.032506	0.026244	0.051463	0.0132	-0.172319
chr3L_22360084_22360692	chr3L_22360084_22360692	3	0.180741	-0.074763	-0.135738	-0.058771	-0.046028	0.263923	0.002787	0.097108	-0.04154	0.009522	0.013918	-0.040582	0.000386	-0.011146	0.043116	0.028664	0.137759	0.122179	0.001613	0.28678	0.626141	0.422555	0.500897	0.295417	-0.008373	0.088584	-0.031579	0.019519	0.03338	0.002426	0.018055	0.223191	-0.137609	-0.077365	0.137059	0.919473	-0.005556	0.083061	0.37664	0.250362	0.021875	-0.034047	-0.023857	-0.021783	0.070373	0.009287	-0.202544
chr3L_22720829_22721314	chr3L_22720829_22721314	3	-0.351346	-0.246319	-0.121171	0.10815	0.244556	0.08791	0.209274	0.171168	0.134604	-0.025603	0.628123	0.640107	0.342126	0.158075	0.233874	0.107519	0.194606	0.093387	0.071625	0.066291	0.117203	0.065869	0.136406	0.026129	-0.001572	0.11467	0.114925	0.043393	-0.066554	-0.004506	-0.041495	0.280887	0.124013	-0.079556	-0.06927	0.040384	0.002271	-0.043506	0.045754	0.108705	-0.02877	-0.025453	0.181675	0.005968	-0.007328	-0.091072	1.73934
chr3L_22795073_22795262	chr3L_22795073_22795262	3	0.159675	-0.455718	0.216336	0.467185	0.189933	0.184928	-0.026427	0.05224	-0.029381	-0.030833	-0.052556	-0.041011	-0.031288	-0.092408	-0.006764	-0.108453	0.092322	0.015304	0.041394	0.206242	0.251498	0.291676	0.176565	0.287049	-0.01667	0.017808	-0.014657	-0.003387	-0.015612	-0.082674	0.080097	0.042009	0.467478	-0.070322	-0.13526	0.796532	0.097698	0.108166	0.334209	0.086594	-0.053719	-0.084959	0.33435	0.009643	0.269424	0.367834	-0.275384
chr3L_22817515_22818418	chr3L_22817515_22818418	3	-0.005817	-0.11213	0.133108	0.143785	0.14726	0.265649	0.422395	0.238688	0.176966	0.072288	0.128763	0.190916	0.118603	0.044202	0.028856	0.107455	0.197298	0.134155	0.171508	0.123282	0.250878	0.165703	0.172473	0.208452	0.450738	0.241073	0.115042	0.070663	0.085149	0.030001	0.058959	0.069426	0.020465	0.01217	0.025251	0.217674	0.010533	-0.01409	0.060312	0.164242	0.016359	0.028597	0.005565	0.081348	0.061356	0.013792	1.45818
chr3L_22828136_22829170	chr3L_22828136_22829170	3	-0.08099	-0.003317	0.064601	0.071929	0.072058	0.246673	0.422592	0.245277	0.247056	0.049827	0.100765	0.050094	0.037312	0.094411	0.077004	0.288457	0.148714	0.110335	0.134602	0.094453	0.143427	0.185874	0.037999	0.30017	0.557952	0.268192	0.136136	0.076277	0.126544	0.036712	0.05478	0.176863	-0.014603	0.121202	0.077915	0.154955	0.026195	0.032122	0.10326	0.023168	0.03471	0.076498	0.036763	0.08658	0.253002	0.07837	0.773938
chr3L_22830855_22831106	chr3L_22830855_22831106	3	-0.30193	-0.114115	0.189234	-0.043042	-0.106609	0.025037	0.121371	0.203215	0.178913	0.063339	0.062014	0.103444	0.16069	0.209474	-0.051372	0.046532	0.121712	0.132083	0.106871	0.04048	0.086299	0.057082	-0.146461	0.263637	0.175603	0.18553	0.08898	0.014429	0.063945	0.019339	-0.007827	0.165654	-0.076397	0.031606	-0.032516	0.092448	0.013473	0.009755	0.056211	0.009175	-0.030682	0.021597	-0.022928	0.001106	0.143415	0.124167	-0.106165
chr3L_22903338_22903635	chr3L_22903338_22903635	3	-0.051954	-0.155144	-0.002007	0.103733	-0.008115	0.028239	0.192757	0.151061	0.137134	0.056895	0.051631	0.113412	0.049282	0.040536	0.202897	0.057993	0.056878	0.105192	0.058205	0.107314	0.156027	0.256579	0.116119	0.072096	0.049604	0.093381	0.079197	0.026557	0.034186	0.017653	0.017013	0.074557	0.08931	-0.150399	0.060765	0.324653	0.010168	-0.029373	0.163623	0.089075	0.048896	0.083174	0.155803	0.066942	0.119782	0.031366	0.862785
chr3L_22938157_22938890	chr3L_22938157_22938890	3	-0.145797	0.000981	0.004015	0.280279	0.028455	0.116943	0.433467	0.287219	0.228644	0.120888	0.151869	0.279621	0.170912	0.112461	0.110463	0.09977	0.396889	0.377659	0.294767	0.12483	0.115986	0.106184	0.18059	0.009854	0.487764	0.365012	0.368064	0.093865	0.109574	-0.00674	0.040215	0.034389	0.098468	0.068403	-0.009918	0.176209	0.021176	0.015511	0.097591	0.090336	0.036976	0.048691	0.064467	0.211319	0.49489	0.207603	1.2919
chr3L_2478452_2478801	chr3L_2478452_2478801	3	-0.095664	0.009623	0.158819	-0.005866	0.148777	-0.012477	0.057767	0.170405	-0.041741	0.111114	0.065508	-0.002552	-0.002953	0.054694	-0.055436	0.041373	0.057715	0.088273	0.117358	0.02065	0.129751	-0.010905	0.010671	0.378035	0.005317	0.103696	0.037372	-0.002339	0.046522	0.010179	-0.023139	-0.10143	-0.160724	0.017336	0.078228	-0.075608	0.037725	-0.036207	0.028524	0.023186	0.001778	0.061025	-0.065856	-0.003952	-0.001885	-0.052846	0.109358
chr3L_2489846_2490410	chr3L_2489846_2490410	3	-0.122308	-0.005161	0.116684	0.166373	0.230375	0.142247	0.126823	0.194486	-0.016675	0.051893	0.053825	-0.01434	0.065298	0.086091	0.098592	0.101777	0.120038	0.17444	0.12839	0.086932	0.102391	0.12105	-0.021574	0.222368	0.195067	0.206839	0.174943	0.040695	0.123499	0.074282	0.094568	-0.05906	-0.01947	0.009464	0.076159	0.124311	0.015165	0.001368	0.036365	0.079635	0.091459	0.068955	0.064745	0.056971	0.103437	-0.047513	1.02246
chr3L_2493499_2494068	chr3L_2493499_2494068	3	-0.252671	-0.303469	0.190368	-0.072895	0.033722	0.320969	0.219945	0.436541	0.280617	0.216749	0.073102	-0.01783	0.063227	-0.016133	0.094131	0.070443	0.151597	0.139054	0.248347	0.193648	0.229715	0.044583	0.299542	0.398214	0.10976	0.140121	0.096749	0.021643	0.037614	0.008478	-0.07434	-0.061532	-0.087452	0.002525	-0.087065	-0.202998	0.003858	-0.066635	-0.10104	0.069601	0.004066	0.009736	0.061551	0.048868	-0.025886	-0.051242	-0.103457
chr3L_2551343_2551692	chr3L_2551343_2551692	3	-0.23399	-0.256553	0.462507	0.359407	0.29675	0.328017	0.291098	0.15581	0.076537	0.153058	0.022888	0.036821	0.070585	-0.046815	-0.043088	0.06815	0.060557	0.100644	0.18667	0.16673	0.099379	0.083589	0.137715	0.333059	0.149334	0.038039	0.07693	-0.027532	0.032817	-0.050545	0.029268	-0.111983	-0.084651	0.089827	-0.057533	0.077906	0.00347	-0.019504	-0.058075	0.084733	0.055101	-0.058896	-0.07853	-0.004476	0.177795	-0.086841	-0.001971
chr3L_2820647_2821618	chr3L_2820647_2821618	3	-0.354205	-0.138753	0.169873	0.095972	0.145548	0.279928	0.417174	0.308984	0.080394	0.090738	0.115885	0.087618	0.142384	0.112135	0.06668	0.189085	0.325808	0.284379	0.290996	0.158419	0.184123	0.198324	-0.006652	0.17287	0.544605	0.243345	0.190569	0.057718	0.158845	0.064022	0.116624	-0.045093	-0.104918	0.056907	-0.028829	0.123395	0.00554	0.019752	0.088141	0.03541	0.023684	0.283683	0.021761	0.187854	0.28127	0.251864	1.22672
chr3L_2823285_2824147	chr3L_2823285_2824147	3	-0.077721	0.01955	0.348991	0.092895	0.096177	0.023896	0.064968	0.089455	0.054499	0.082997	0.081827	0.016059	0.088528	0.173976	0.308559	0.116052	0.113972	0.153886	0.124633	0.174979	0.069793	0.079773	-0.111063	0.350045	0.269092	0.214008	0.165345	0.082016	0.195681	0.086552	0.077531	-0.093871	-0.071981	0.041819	0.008222	0.011251	0.038189	0.047284	0.05424	0.013323	0.032576	0.421575	-0.020242	0.069668	0.415857	0.437924	-0.050679
chr3L_2867169_2867910	chr3L_2867169_2867910	3	0.039209	0.001243	-0.000999	0.134612	0.161256	0.071762	0.179443	0.240008	0.112717	0.135776	0.105409	0.045651	0.06521	0.052816	0.201514	0.12831	0.102993	0.116397	0.179674	0.086872	0.037951	0.084162	0.109126	0.176522	0.184725	0.120429	0.125488	0.082574	0.151846	0.066724	0.115214	0.011827	-0.00667	0.069579	0.159475	0.150981	0.018886	0.037417	0.04137	0.045041	0.088456	0.091016	0.001739	0.034481	0.184925	0.033489	0.793102
chr3L_3192913_3193385	chr3L_3192913_3193385	3	-0.213994	-0.06631	-0.112583	0.183586	0.27369	0.549885	0.637935	0.287737	0.343492	0.124254	0.737832	0.654095	0.414899	0.37797	0.10387	0.094553	0.038955	0.304599	0.081739	0.095272	0.15015	0.050448	0.206383	0.084844	0.075206	0.133058	0.117864	0.071845	-0.030957	0.01615	-0.020537	0.268566	0.07273	-0.071758	-0.088885	-0.068454	0.009182	-0.060981	-0.014037	0.013396	0.008073	-0.014943	0.167933	0.031358	-0.110549	-0.255818	1.37469
chr3L_3239634_3240729	chr3L_3239634_3240729	3	-0.087444	-0.072218	0.443672	-0.03172	0.193149	0.10993	0.151881	0.360712	0.093085	0.19749	0.192069	0.758335	0.724032	0.618895	0.165	0.130726	0.10417	0.20169	0.144373	0.198744	0.172777	0.065526	0.079205	0.442419	0.162355	0.115845	0.10236	0.066104	0.086989	0.017502	0.000367	0.045944	0.092784	-0.025627	0.127753	0.057451	0.042546	-0.040241	-0.000882	0.000211	0.017723	0.030883	0.234814	0.055285	0.193506	0.11959	0.960732
chr3L_3246314_3246858	chr3L_3246314_3246858	3	-0.086062	-0.03488	0.021413	-0.058309	0.124896	0.139234	0.012408	0.123908	0.089073	0.070429	0.132671	0.02355	0.059315	-0.020434	0.101602	0.087174	0.077038	0.159123	0.202116	0.179346	0.153053	0.140266	0.106741	0.21238	0.211109	0.208156	0.152689	0.068216	0.092378	0.07354	0.034926	-0.133959	0.002303	-0.00434	-0.058442	-0.014183	0.014015	-0.009781	0.013481	0.016057	0.011591	0.011189	-0.041953	0.101366	0.102096	-0.019602	0.332123
chr3L_3249035_3250780	chr3L_3249035_3250780	3	-0.185088	-0.096692	0.104526	0.162944	0.14259	0.19636	0.398684	0.194267	0.066594	0.077401	0.096095	0.077665	0.169658	0.053943	0.220812	0.10616	0.112605	0.179479	0.177464	0.172471	0.057565	0.133747	0.124212	0.067776	0.444616	0.479175	0.450238	0.093694	0.126594	0.064326	0.13431	0.058673	0.026519	0.006647	-0.023216	0.176267	0.01071	-0.010162	0.091677	-0.001331	0.011665	0.045347	0.1131	0.048914	0.144703	0.044062	2.22577
chr3L_3542446_3543121	chr3L_3542446_3543121	3	-0.007741	-0.115899	0.105212	-0.00934	0.092715	0.132658	0.075426	0.161632	0.086608	0.038254	0.05058	0.036008	0.018596	-0.017731	0.016743	0.141309	0.105633	0.222455	0.104311	0.194846	0.105032	0.221349	0.109302	0.309229	0.188831	0.153518	0.059032	0.032402	0.15561	0.05427	0.124288	-0.128238	-0.028908	0.008671	-0.032912	0.123663	0.010757	-0.039359	0.050626	0.051345	-0.008842	0.005232	0.033893	0.036345	0.078901	-0.121814	-0.242157
chr3L_3544988_3545395	chr3L_3544988_3545395	3	0.041281	-0.091658	0.331613	0.183445	0.238963	0.095525	0.190821	0.267319	0.081374	0.183114	0.016921	0.009461	0.0038	-0.063618	0.090262	0.048396	0.023401	0.005545	0.072807	0.068909	0.044573	0.15865	0.007509	0.360023	0.083969	0.050451	0.066712	0.021355	-0.024759	0.054832	-0.006092	-0.009798	-0.138649	0.228559	0.065433	-0.025997	0.024305	0.03342	0.000196	0.045303	-0.048642	-0.003572	-0.034992	0.034956	0.259115	0.110435	0.35444
chr3L_3556100_3556528	chr3L_3556100_3556528	3	-0.062207	-0.103919	0.080461	0.012884	0.044693	0.165988	0.161687	0.336841	0.223609	0.153692	0.058292	-0.011342	0.019235	0.006843	0.213714	0.042148	0.131496	0.130613	0.157776	0.274671	0.187109	0.143394	0.129207	0.278664	0.182636	0.372247	0.287194	0.067834	0.081731	0.068813	0.01573	-0.064406	-0.012134	0.039955	0.033254	0.050351	0.030435	-0.014482	0.042492	-0.008224	0.022787	0.050231	0.011779	0.021547	0.058921	-0.039948	0.092639
chr3L_3765673_3766122	chr3L_3765673_3766122	3	-0.263509	-0.306538	0.076335	0.061452	0.023264	0.017258	0.019264	0.085507	0.025495	-0.017466	0.065594	-0.02601	0.144546	0.148316	0.099764	0.026318	0.026983	0.079564	0.085063	0.047324	0.013569	0.096563	-0.117112	0.345362	0.065544	0.039909	0.034919	-0.001327	-0.014657	-0.004434	-0.033424	-0.132892	0.063858	-0.132344	0.056289	-0.015755	-0.003635	-0.012885	-0.00324	-0.038654	0.085517	0.11319	-0.059538	0.006073	0.023255	-0.154886	-0.056019
chr3L_4071648_4071980	chr3L_4071648_4071980	3	-0.099776	0.081499	-0.087662	-0.081304	-0.137257	0.061449	0.04404	-0.031717	-0.002705	-0.088436	0.066341	-0.011066	0.022357	0.083637	0.025145	0.090425	0.099412	0.123578	0.064455	0.071856	-0.027557	0.050632	-0.014492	0.141679	0.126255	0.099619	0.082268	0.04912	0.02089	0.075111	0.173596	0.015302	-0.147175	0.015513	0.07116	0.140203	0.01377	0.029638	0.059475	0.001428	0.095779	0.245942	-0.055185	0.064381	0.130374	0.126585	0.008569
chr3L_4102687_4102884	chr3L_4102687_4102884	3	-0.276744	-0.177322	-0.108	0.029232	0.117349	0.24073	0.175391	0.060276	0.071895	-0.039247	0.665324	0.625002	0.300666	0.191775	0.062225	0.082322	0.063435	0.071438	0.089594	0.125672	0.131897	0.063567	0.159688	-0.080023	0.106642	0.134523	0.108988	0.046647	-0.017929	0.009034	-0.00383	0.334516	-0.035524	-0.136439	-0.088689	0.004443	0.014086	-0.036872	-0.006824	0.009846	0.059738	0.040241	0.047326	0.017897	-0.082305	-0.180394	1.39323
chr3L_4227186_4227553	chr3L_4227186_4227553	3	-0.66595	-0.135442	0.111533	0.125436	0.102058	0.146737	0.500223	0.259709	0.194902	0.158682	0.043818	0.055809	0.294934	0.012186	0.127529	0.034484	0.183338	0.159533	0.235067	0.254368	0.109163	0.06202	0.044766	0.250229	0.317912	0.145873	0.08056	0.100276	0.248966	0.056949	0.165734	-0.139432	-0.003347	0.0222	-0.183933	-0.082975	0.010219	-0.007098	0.036741	-0.001599	0.009267	0.027878	0.023731	0.061624	0.584847	0.180919	1.15339
chr3L_4233691_4234050	chr3L_4233691_4234050	3	-0.26958	-0.009283	-0.009348	-0.047449	-0.077978	0.150939	-0.001721	0.033227	-0.02601	-0.039083	0.08269	0.06037	0.075025	0.044455	0.045508	0.177889	0.145791	0.214171	0.219998	0.191258	0.189254	0.195672	0.279083	0.129976	0.304145	0.265284	0.211172	0.072434	0.161825	0.138875	0.228797	-0.104903	-0.19539	-0.080447	-0.084996	0.05617	0.001085	-0.046985	0.0043	0.056344	0.017984	0.068202	0.002263	0.069657	0.076607	0.047321	0.167438
chr3L_4235080_4235398	chr3L_4235080_4235398	3	-0.106476	-0.246346	0.300169	-0.055936	0.152533	0.035501	0.202967	0.321064	0.03122	0.164534	0.078904	-0.034764	-0.011821	0.043415	0.106211	0.11893	0.157092	0.126506	0.21456	0.177438	0.074315	0.227681	0.018844	0.402442	0.097234	0.159474	0.148118	0.031244	-0.00883	-0.009924	-0.043475	-0.106968	0.026913	-0.008997	0.070414	-0.002064	0.018789	-0.012167	-0.001207	-0.008322	0.05693	0.089212	-0.090929	-0.01359	-0.058675	-0.158316	0.001831
chr3L_4413776_4414273	chr3L_4413776_4414273	3	-0.307967	-0.172392	0.008113	-0.13704	-0.015768	0.197171	0.149841	0.119159	0.059231	-0.004933	0.128599	0.127193	0.061021	0.039351	0.030888	0.122498	0.119181	0.157551	0.169817	0.164951	0.151231	0.160128	0.123527	0.154951	0.178515	0.138136	0.11007	0.025481	0.073111	-0.032068	0.012558	-0.022304	-0.004991	-0.110479	0.003741	0.033375	0.02096	-0.04041	0.048365	0.137167	0.031237	0.023067	0.04221	0.068624	0.062374	-0.091803	0.216247
chr3L_4624481_4624848	chr3L_4624481_4624848	3	-0.237723	-0.212037	0.031432	0.019525	0.017058	0.091915	0.029977	0.028232	0.009324	0.01636	0.030976	0.060637	0.011281	0.039459	0.228606	0.007492	0.103896	0.14788	0.113551	0.171342	0.094822	0.112384	0.028174	0.307083	0.154817	0.111104	0.092476	0.066791	0.070186	-0.003618	0.019905	-0.056144	-0.166255	-0.077229	-0.042594	-0.184638	0.005787	-0.038155	-0.048176	0.065849	-0.01336	0.023303	-0.011949	0.023803	0.065099	-0.332326	0.240799
chr3L_4854063_4854373	chr3L_4854063_4854373	3	-0.108343	-0.100588	-0.023422	-0.119124	-0.122386	0.157189	0.133903	0.136217	0.017694	0.092488	0.172802	-0.003102	0.008533	0.054657	0.11352	0.051338	0.120954	0.221265	0.174283	0.214555	0.244583	0.00156	0.139713	0.188929	0.09445	0.207729	0.184752	0.095091	0.071105	-0.000818	0.002629	-0.096154	-0.093017	-0.074379	0.032382	-0.141152	0.000635	-0.027097	-0.039704	0.02237	0.070643	0.04908	-0.074863	0.009709	0.058418	-0.116676	-0.149745
chr3L_5064975_5065176	chr3L_5064975_5065176	3	-0.130902	0.174596	-0.140184	-0.174029	-0.16074	-0.077572	-0.036498	-0.108929	-0.098137	-0.058561	-0.04252	-0.026607	-0.037108	-0.03556	0.231788	-0.06858	-0.075903	-0.02528	0.027881	0.11497	-0.101402	-0.210215	-0.202549	-0.123877	0.065411	-0.052308	-0.050241	-0.038651	0.105949	-0.022235	0.088781	-0.126098	-0.190439	0.008432	-0.213993	0.021097	-0.022874	0.04288	0.043009	-0.010008	0.054559	0.036064	-0.148434	-0.026939	0.285319	0.315011	-0.105016
chr3L_5165393_5165618	chr3L_5165393_5165618	3	0.050344	-0.146906	0.057029	0.076361	-0.052038	0.053815	-0.003613	0.022003	0.069617	-0.002453	0.059559	0.01976	-0.01981	-0.031177	-0.025585	0.077621	0.007865	0.052453	0.095958	0.032313	0.059279	0.071456	0.151848	0.078985	0.027482	0.021413	0.054889	0.031319	0.022509	0.022604	-0.040464	-0.050877	-0.072074	0.00919	-0.017038	-0.132454	0.005422	0.003641	-0.035954	0.016841	-0.027608	-0.022505	-0.043482	0.032575	0.087402	0.023782	0.011383
chr3L_516883_517168	chr3L_516883_517168	3	-0.228899	-0.113863	0.545328	0.381939	0.444821	0.065756	0.182133	0.225682	0.07934	0.13089	0.033885	-0.035336	0.014892	-0.036136	0.042119	0.112069	0.059097	-0.040936	0.070981	-0.014179	0.07177	0.042586	0.017378	0.306689	0.07273	0.051607	0.063858	0.043662	0.101504	0.001776	0.035824	-0.191212	-0.065953	0.213005	0.078284	-0.236084	0.022262	-0.002845	-0.053527	0.025902	0.021617	-0.034369	-0.036108	-0.069857	0.481148	0.122675	0.159672
chr3L_5176045_5176438	chr3L_5176045_5176438	3	-0.248178	-0.099172	0.108022	0.103664	0.10186	0.336606	0.173405	0.248488	0.154941	0.151831	0.101462	0.106537	0.100829	0.012632	0.194889	0.12567	0.059329	0.167149	0.166037	0.196237	0.156754	0.131126	0.088136	0.221212	0.264179	0.134475	0.13056	0.062088	0.207492	-0.001931	0.041023	-0.108168	-0.021057	-0.134621	-0.135465	0.017635	0.00374	-0.012785	0.024116	0.099721	0.060348	0.089886	0.018653	0.049322	0.368952	0.045206	0.61869
chr3L_5177612_5178474	chr3L_5177612_5178474	3	-0.195483	-0.026978	0.167175	0.12153	0.220047	0.194258	0.294475	0.1692	0.126668	0.104822	0.038754	0.012708	0.071407	0.007009	0.028426	0.097096	0.120971	0.118863	0.1076	0.045145	0.090385	0.192492	0.152775	0.254383	0.461264	0.151028	0.09594	0.032601	0.047321	0.057819	-0.01235	-0.061372	-0.012589	0.082813	-0.009196	-0.000931	0.00617	-0.008342	0.043913	0.046389	0.032529	0.021617	-0.034256	0.128916	0.187736	0.031544	1.16765
chr3L_5270203_5270425	chr3L_5270203_5270425	3	-0.05023	-0.278186	-0.014542	0.061968	0.051401	-1.1e-05	0.03543	0.062581	0.001985	-0.003354	0.018861	-0.003786	-0.015995	-0.028704	-0.025291	0.05431	-0.054958	0.067676	0.052491	-0.050507	-0.009711	0.064792	0.013412	0.029328	-0.015512	0.018564	0.042213	0.008689	-0.071032	-0.040213	-0.09035	-0.007753	0.032369	-0.027685	-0.011493	0.09413	-0.003665	-0.025392	-0.023358	-0.040536	-0.037028	-0.009256	-0.066358	0.040283	-0.093523	-0.107721	0.656691
chr3L_5270881_5271432	chr3L_5270881_5271432	3	-0.009742	-0.067303	0.039665	0.009845	0.018925	0.103475	0.209978	0.14023	0.029571	-0.048606	0.1212	0.041941	0.004754	0.009081	0.096389	0.002303	0.048136	0.05338	0.078833	0.035641	0.017718	0.130116	0.097341	0.082867	0.105839	0.125585	0.097981	0.032346	-0.013921	0.005968	-0.011549	0.127873	-0.067783	-0.14356	0.022772	0.134136	0.01748	-0.039007	0.032807	0.036809	-0.007669	0.001182	0.003529	0.019731	-0.032812	-0.200349	0.645354
chr3L_530860_531373	chr3L_530860_531373	3	-0.239364	-0.224162	0.437735	0.234522	0.448038	0.336981	0.322523	0.458844	0.213463	0.262234	0.093499	0.003561	0.084821	0.008376	0.181381	0.335207	0.313027	0.17999	0.193567	0.249075	0.254748	0.17721	0.109181	0.255098	0.156158	0.167416	0.088469	0.058391	0.153234	0.010821	0.010823	-0.14342	-0.051856	-0.014016	-0.049588	0.026695	0.008931	0.011217	0.015244	-0.01651	0.027261	0.015101	0.032122	0.048729	0.035291	-0.183819	0.728303
chr3L_544128_544503	chr3L_544128_544503	3	-0.233837	-0.213674	0.465412	0.509385	0.34282	0.200866	0.105402	0.166901	0.070169	0.130787	0.055864	0.054816	0.058426	-0.032312	-0.025421	0.137621	0.176867	0.072802	0.040465	0.073886	0.15812	0.128039	0.193895	0.282005	0.027312	0.092004	0.070155	0.013595	0.004091	-0.005395	-0.030281	-0.069543	0.084214	0.025339	0.002202	0.104671	0.013635	0.052026	0.061997	0.066509	-0.01034	-0.034135	-0.01394	0.011393	0.20991	-0.031172	1.59595
chr3L_545799_546227	chr3L_545799_546227	3	-0.189483	-0.160855	0.271	0.39481	0.210553	0.071979	0.202353	0.07241	0.07097	0.069966	0.046555	0.038119	0.076483	-0.001436	0.103888	0.167011	0.196359	0.063314	0.080401	0.046377	0.090292	0.096952	0.190604	0.172975	0.056603	0.073108	0.089522	0.017809	-0.021351	0.026329	-0.033563	-0.096853	-0.079968	0.101499	-0.044998	0.230363	0.014212	0.017817	0.141953	0.096523	0.015215	0.016381	0.026755	0.067911	0.221811	-0.003455	1.58771
chr3L_5763946_5764164	chr3L_5763946_5764164	3	-0.15484	-0.048478	-0.157365	0.017828	0.000627	0.030914	0.207289	0.13919	0.140958	-0.025789	0.311727	0.431756	0.142214	0.148901	0.143423	0.093572	0.153017	0.137157	0.077542	0.157064	0.008304	0.068411	0.016751	-0.047525	0.18805	0.244627	0.224307	0.127577	0.092174	0.044661	0.09626	0.053983	-0.086725	-0.021543	-0.039874	-0.008747	0.015181	-0.022356	0.0258	-0.051259	0.048656	0.072725	0.182638	0.110414	0.023383	-0.071621	1.06794
chr3L_603821_604235	chr3L_603821_604235	3	-0.172982	-0.101323	0.08872	0.013087	0.119383	0.125809	0.198364	0.1798	0.028394	-0.012045	0.052444	0.088807	0.202705	0.123931	0.08863	0.138453	0.097475	0.112788	0.066244	0.081217	0.049405	0.142348	0.156368	0.05049	0.048382	0.136761	0.112219	0.053455	0.019155	-0.010714	-0.00318	0.014072	-0.074372	-0.053111	0.066712	0.003324	0.021167	-0.0004	0.098751	0.068486	0.051892	-0.01742	0.046163	0.01803	0.060718	-0.072497	0.506483
chr3L_6177984_6178273	chr3L_6177984_6178273	3	-0.010375	-0.078193	-0.023423	0.143813	0.170346	0.039021	0.176741	0.150038	0.120975	0.013396	0.184551	0.42784	0.156629	0.152586	0.114538	0.084918	0.412421	0.06892	0.135303	0.062099	0.065542	0.133012	-0.100948	0.005438	-0.002969	0.077905	0.086356	0.065426	0.061125	0.006738	0.058694	0.296597	0.043134	0.024209	-0.051508	0.036723	0.011022	0.013947	0.03232	0.028309	0.034483	0.068948	0.190995	-0.018279	-0.017592	-0.085686	1.47236
chr3L_6210880_6211379	chr3L_6210880_6211379	3	-0.067658	-0.13007	-0.047615	0.322517	0.177458	0.044798	0.359021	0.113009	0.203369	0.100478	0.069602	0.057727	0.184016	-0.003928	0.088899	0.149898	0.024578	0.081507	0.069265	0.193622	0.069451	0.086775	0.167647	0.028596	0.130237	0.113213	0.062608	0.046479	0.038927	0.03836	-5.6e-05	-0.015917	0.088938	0.042165	0.024549	0.177874	0.001224	0.038528	0.082316	0.056074	0.021	0.006228	0.08854	0.0058	0.063248	-0.01068	1.32303
chr3L_6256865_6257195	chr3L_6256865_6257195	3	0.048761	-0.088885	-0.006184	-0.076932	0.146373	0.10956	0.234777	0.245462	0.137021	0.023299	-0.001993	-0.04517	0.361305	0.39824	0.04379	0.002271	0.063965	0.075244	0.04788	0.171829	0.129008	-0.036924	0.132105	0.286457	0.065149	0.042273	0.034449	0.019257	0.128787	0.033973	0.049304	-0.132909	-0.089654	0.021695	0.085341	-0.052488	0.024477	0.008149	-0.017134	0.094234	0.138067	-0.001747	-0.040533	0.026917	-0.008744	-0.140108	-0.088433
chr3L_626464_627308	chr3L_626464_627308	3	-0.177352	1.01967	0.378887	-0.198861	-0.118118	0.183882	0.06634	0.390636	0.016083	0.088981	-0.007359	0.000573	0.004	-0.053531	0.54295	0.090782	0.150363	0.136821	0.158817	0.193966	0.210842	0.028899	0.199173	0.421966	0.566415	0.465946	0.358483	0.260001	0.370633	0.526451	0.419267	-0.180959	-0.278679	0.190244	-0.19335	-0.398728	0.072828	0.094034	0.17462	0.106673	-0.001409	-0.087267	-0.115171	0.044639	0.137774	0.264467	0.699511
chr3L_673452_673662	chr3L_673452_673662	3	-0.023204	0.338162	0.106282	-0.014016	0.022943	0.174538	-0.000536	-0.027299	0.051139	0.006809	0.025315	0.071075	0.00497	-0.024422	0.002275	0.056223	0.022838	0.152901	0.021675	0.049134	0.051505	0.062514	0.110221	0.108652	0.082372	0.006858	0.05447	0.010064	0.057927	0.028963	0.060139	0.115746	0.03728	0.068327	0.036904	0.151906	0.029633	0.042202	0.072715	0.038207	0.043423	0.032476	-0.044775	-0.00695	-0.053635	-0.052892	-0.109963
chr3L_7428038_7428575	chr3L_7428038_7428575	3	-0.283605	-0.112057	0.051639	0.107548	0.046549	0.254924	0.44316	0.312903	0.194422	0.099839	0.193229	0.144319	0.116211	0.048692	0.328956	0.172237	0.143061	0.174163	0.203062	0.408363	0.159513	0.168545	0.119873	0.078321	0.251793	0.190834	0.200907	0.077775	0.188085	0.054909	0.069502	0.009138	-0.01881	-0.095854	-0.068091	-0.011929	0.009821	-0.019167	0.025965	0.086443	0.040042	0.034483	0.107347	0.07448	0.060964	0.041948	1.83616
chr3L_769096_769560	chr3L_769096_769560	3	-0.072039	-0.224837	0.186005	0.080218	0.176475	0.114599	0.232268	0.294635	0.129487	0.147589	0.015245	0.042948	-0.013115	0.019091	0.03364	0.176366	0.127342	0.084112	0.079946	0.124534	0.035929	0.098454	-0.009376	0.156355	0.007514	0.112998	0.085019	0.015874	0.053907	-0.022944	-0.076595	0.008433	-0.077989	-0.009311	-0.031788	0.069803	0.010521	-0.052896	-0.010377	0.017536	0.035949	-0.0275	-0.016023	-0.031886	-0.01382	-0.017736	0.096388
chr3L_7798400_7798919	chr3L_7798400_7798919	3	-0.236855	-0.213391	0.145663	0.118009	0.077564	0.203764	0.353551	0.319645	0.276907	0.110161	0.125292	-0.025172	0.014289	-0.048598	0.061814	0.152508	0.079488	0.081969	0.123969	0.099479	0.060219	0.085195	-0.034781	0.21982	0.048397	0.098922	0.088854	-0.031646	-0.022348	0.001125	-0.091384	-0.127645	-0.023223	-0.087514	0.006079	-0.09075	0.00197	-0.112524	-0.033809	-0.004449	0.004708	-0.039266	-0.062249	0.022858	-0.004823	-0.160619	-0.088306
chr3L_7802653_7803307	chr3L_7802653_7803307	3	-0.251794	-0.091858	0.119739	0.033857	0.053185	0.145517	0.280829	0.163747	0.097414	0.064691	0.093238	0.022685	0.062275	0.021039	0.016239	0.200852	0.08651	0.101684	0.187154	0.322683	0.031174	0.099054	0.081628	0.185043	0.258372	0.133975	0.137716	0.059431	0.299933	0.013329	0.084709	0.00345	-0.035978	-0.142015	0.008188	0.067278	0.004731	-0.05416	0.024467	0.015505	0.097989	0.063735	0.0023	0.010362	0.012881	-0.096032	0.522547
chr3L_8073943_8074199	chr3L_8073943_8074199	3	-0.03339	-0.183428	0.468882	0.144806	0.255452	-0.057193	0.04278	0.083889	-0.061969	0.070833	0.024043	-0.021404	-0.031053	-0.061765	0.162574	0.00667	0.010651	0.01576	0.056634	-0.017469	-0.027581	0.095284	-0.162241	0.268831	0.006423	0.041528	0.052631	0.035739	0.009096	0.032129	-0.064223	-0.038348	0.067849	0.063155	0.05902	0.093181	0.029946	0.00061	0.00758	0.003056	-0.044372	-0.080505	-0.051813	-0.028947	0.105815	-0.092079	0.026287
chr3L_8074690_8075171	chr3L_8074690_8075171	3	0.12511	-0.008147	0.174415	0.171926	0.026267	0.063055	0.076353	0.031497	0.091403	0.028821	0.068618	0.11479	0.10914	0.05367	0.067561	0.050019	0.036204	0.063754	0.066547	0.07319	0.025682	0.163225	0.204654	0.092038	0.107186	0.044151	0.051941	0.024402	0.099993	0.066535	-0.019514	0.040595	0.134884	-0.047029	-0.056447	0.209601	0.007951	-0.003669	0.050073	0.049076	-0.028961	0.023907	-0.012825	0.01121	-0.067327	-0.160321	0.14982
chr3L_8539511_8539880	chr3L_8539511_8539880	3	-0.059617	0.002975	0.105919	0.130588	0.227496	0.149276	0.180141	0.177325	0.086159	0.123923	0.151164	0.098692	0.107991	-0.027591	-0.020877	0.031217	0.032588	0.062982	0.119437	0.069406	0.078881	0.073132	0.110864	0.111054	0.002461	0.068946	0.050549	0.054821	-0.00351	0.049101	0.023953	0.022534	0.02617	0.029888	-0.044084	0.145194	0.014052	0.017171	0.048882	-0.021132	-0.004942	-0.014814	0.03524	0.06006	0.135825	0.101721	1.24424
chr3L_8652425_8652713	chr3L_8652425_8652713	3	-0.020074	-0.209994	0.759307	0.126532	0.371451	0.209594	0.17189	0.443231	0.182209	0.371288	-0.010081	-0.033685	-0.020724	0.005418	0.023086	0.16911	0.10769	0.04573	0.103286	0.115944	0.17394	0.085329	0.063827	0.408354	0.064336	0.026979	0.048756	0.005114	-0.049861	-0.007594	-0.002381	-0.211304	-0.248284	0.201626	0.099585	-0.221397	0.069262	0.013526	-0.13251	-0.029214	-0.033558	-0.064167	-0.081466	-0.012913	0.420869	0.239183	0.195359
chr3L_8653373_8653810	chr3L_8653373_8653810	3	-0.31881	-0.153766	0.378417	0.018558	0.194814	0.051672	0.347081	0.358286	0.334669	0.281896	0.017153	-0.023146	0.006804	0.00213	0.055773	0.130923	0.202672	0.137386	0.235093	0.340549	0.021495	0.020817	-0.035477	0.324795	0.126238	0.139654	0.136018	0.06108	0.175129	-0.006419	0.03138	-0.152705	0.051569	0.201057	-0.062736	0.079477	0.012527	0.016849	0.060903	-0.019138	0.029799	-0.008895	-0.102953	0.039867	0.402696	0.261721	-0.040833
chr3L_8660819_8661849	chr3L_8660819_8661849	3	0.035422	-0.090558	0.495818	0.199016	0.426413	0.127327	0.100174	0.267212	0.067989	0.224647	0.108881	0.02963	0.072429	0.001308	0.283069	0.173585	0.145043	0.107891	0.091338	0.094127	0.035952	0.119223	-0.016436	0.253055	0.122977	0.064519	0.106947	0.06653	0.089882	0.046565	-0.014492	0.025221	0.074218	0.161005	0.168489	0.178153	0.032501	0.029701	0.100202	0.053569	0.03917	0.027569	0.029191	0.043663	0.311029	0.269538	-0.031312
chr3L_8665909_8666191	chr3L_8665909_8666191	3	-0.028946	-0.31527	0.15432	0.152764	0.225153	-0.035108	0.049872	0.078527	0.042051	0.031218	0.084592	0.084651	0.079062	0.087455	0.078964	0.120661	0.077571	0.102865	0.057118	0.121552	-0.000345	0.15767	-0.02979	0.140487	0.145886	0.076719	0.04876	0.034067	0.123164	0.049929	-0.038619	-0.212993	-0.027172	-0.045993	-0.011859	0.132843	0.000379	0.015996	0.03598	0.016454	-0.003992	-0.021062	-0.071171	0.076166	0.15179	0.017972	-0.087866
chr3L_8692798_8693777	chr3L_8692798_8693777	3	-0.224696	-0.085688	0.365441	-0.071355	0.112165	0.285863	0.233368	0.444986	0.222861	0.368169	0.058942	-0.022685	0.016305	0.079141	-0.019872	0.250283	0.288975	0.237857	0.213232	0.381849	0.211015	0.148618	0.082016	0.504141	0.184411	0.156686	0.142638	0.09061	0.091665	0.041377	0.047664	-0.159573	0.034811	0.138519	-0.100157	0.090315	0.044387	0.0402	0.046395	0.02913	0.016573	0.081532	-0.07684	0.099864	0.399506	0.397758	0.159944
chr3L_8698034_8698519	chr3L_8698034_8698519	3	-0.03446	-0.088749	0.391782	0.013036	0.060721	0.059976	0.247797	0.349258	0.144487	0.343406	0.116724	0.001413	0.04182	0.018096	0.040046	0.163668	0.108334	0.057995	0.123472	0.107256	0.009073	0.024758	0.067628	0.39669	0.020984	0.196669	0.164163	0.03943	0.070142	0.009188	0.027187	-0.186159	-0.110018	0.130005	0.083679	0.036684	0.026237	0.036647	0.019146	-0.039919	0.073811	0.044275	0.031067	0.0472	0.331584	0.356752	0.203893
chr3L_8757808_8758200	chr3L_8757808_8758200	3	-0.149881	-0.155511	0.083958	-0.007201	-0.05993	0.24212	0.219206	0.403008	0.219282	0.209373	0.059436	-0.001025	0.012146	-0.009834	-0.02029	0.078249	0.043792	0.087587	0.168076	0.21746	0.128732	0.155079	0.110336	0.387891	0.206357	0.149282	0.096873	0.05412	0.096636	0.01452	0.028128	-0.11754	-0.108083	0.094243	-0.032689	-0.036809	0.020303	-0.021657	-0.021727	0.032932	-0.014796	0.018714	0.004345	0.003561	0.07893	-0.173233	-0.04392
chr3L_880902_881346	chr3L_880902_881346	3	-0.180139	-0.192929	0.151989	0.111523	0.37733	0.037944	0.194841	0.245347	0.063699	0.11006	0.037028	0.00152	0.016702	0.002856	0.030142	0.06233	0.097517	0.085074	0.163351	-0.022935	-0.034675	0.044768	-0.013623	0.358134	0.059927	0.109191	0.117687	0.037545	0.004374	-0.018375	0.033947	-0.061584	-0.021869	0.057811	0.154406	0.119596	0.028437	-0.001441	0.054355	-0.018324	0.032836	-0.01633	0.051541	-0.001656	0.145817	0.101793	0.420192
chr3L_881597_882304	chr3L_881597_882304	3	-0.0787	-0.188913	0.342415	0.132232	0.277399	0.293476	0.221023	0.275337	0.168193	0.101034	0.095052	0.058674	0.055968	0.028783	0.05871	0.077833	0.163465	0.091762	0.148118	0.181522	0.187534	0.157862	0.330523	0.364933	0.055863	0.114404	0.107575	0.068626	0.05215	0.021544	0.011293	-0.072955	-0.013772	0.067908	0.121092	0.052733	0.023545	0.001115	0.032355	0.117499	0.038764	0.073571	0.016506	0.057863	0.301588	0.213998	0.649828
chr3L_8818970_8819388	chr3L_8818970_8819388	3	-0.298521	-0.237879	0.31832	-0.022988	0.042567	0.113819	0.091643	0.409437	0.36142	0.245242	0.012477	-0.026385	0.022423	-0.019761	0.037472	0.035559	0.121421	0.09411	0.099729	0.038976	0.143385	0.156107	0.015544	0.453178	0.087309	0.177612	0.065092	0.060697	0.11085	0.062922	0.062936	-0.029683	0.016498	0.03747	0.041033	-0.020987	0.028954	-0.002844	0.06684	0.063602	-0.029029	0.009924	-0.020923	0.049882	0.174672	0.129651	0.084078
chr3L_8838142_8838555	chr3L_8838142_8838555	3	0.078546	-0.196959	0.367155	0.307702	0.22215	0.098009	0.112067	0.123301	0.017542	0.078647	-0.036419	0.008603	-0.011025	-0.019762	-0.00024	0.071714	-0.040098	0.065035	0.09351	0.029983	0.033033	0.037563	0.102899	0.162452	0.068572	0.075374	0.0528	0.007043	0.004612	-0.019423	-0.033622	-0.021131	0.114167	0.024401	0.042003	0.186959	0.029455	-0.016867	0.073891	0.057221	0.000909	-0.057728	-0.014673	0.009224	0.2174	0.088423	-0.352495
chr3L_9118417_9118790	chr3L_9118417_9118790	3	-0.1443	-0.080369	0.156853	0.090646	0.101204	0.013292	-0.00046	0.03106	0.070343	0.007922	0.03303	0.056612	0.015601	0.016122	0.022186	0.086759	-0.007612	0.081719	0.057012	0.017485	-0.011869	0.179441	0.008809	0.046158	0.260242	0.021032	0.001423	0.034813	0.010013	0.029143	-0.013908	0.05439	-0.053289	0.010975	0.030963	0.076537	0.010855	0.015125	0.099604	-0.00859	-0.013255	0.077899	0.0549	0.013133	0.039976	-0.052445	0.029856
chr3L_9120930_9121177	chr3L_9120930_9121177	3	-0.193743	0.019665	0.352929	0.024343	0.102269	0.025416	0.02183	0.116821	0.065698	0.047153	0.128227	0.033112	0.024472	-0.000913	-0.037523	0.09503	0.051076	0.044739	0.058762	0.193783	0.040044	0.1482	0.013689	0.313048	0.090737	0.049903	0.098505	0.056927	-0.000345	0.048793	0.073796	-0.031519	-0.047189	0.091896	0.124518	0.083081	0.051033	0.029212	0.094036	0.031307	0.055676	-0.00729	0.004198	-0.022616	0.125712	0.013694	-0.295667
chr3L_9370352_9370913	chr3L_9370352_9370913	3	-0.111002	-0.102957	0.043526	-0.071413	0.148049	0.071103	0.025668	0.093699	0.054155	-0.021395	0.038681	0.067213	0.066636	-0.010387	0.173671	0.102635	0.117526	0.137934	0.115945	0.172973	-0.061684	0.146158	0.16017	0.226135	0.087804	0.04264	0.095097	-0.000249	0.022866	0.035856	0.011391	0.107917	-0.005747	-0.079269	0.090726	-0.0007	0.02437	-0.058193	-0.039325	0.045892	0.038478	0.06123	0.05581	-0.009946	-0.118428	-0.237964	0.260461
chr3L_9394936_9395296	chr3L_9394936_9395296	3	-0.192895	-0.091818	-0.066538	0.107787	0.035982	0.200772	0.31089	0.167094	0.206168	0.00928	0.574215	0.415407	0.238815	0.206396	0.071571	0.031274	0.085607	0.103036	0.037956	0.175827	0.090726	0.101547	0.156217	-0.027549	0.058451	0.168241	0.095902	0.0026	0.046936	0.044403	0.000395	0.059674	-0.059559	-0.062721	-0.098608	0.068632	0.009125	-0.04436	0.023359	0.020205	0.020953	0.044032	0.026606	0.018378	0.00479	-0.060714	1.66465
chr3L_9607816_9608041	chr3L_9607816_9608041	3	0.039414	-0.139547	0.011775	0.002445	-0.024871	0.001944	0.089349	0.041607	0.093831	-0.007675	0.131055	0.19405	0.368632	0.362292	0.138123	0.0515	0.09638	0.103293	0.106907	0.059815	-0.000125	-0.026111	-0.014935	0.268456	0.035452	0.070837	0.067548	0.0599	0.004299	-0.016892	-0.052744	0.071421	0.021376	0.060978	0.025364	-0.018571	0.006252	0.012701	0.023388	-0.045647	0.045716	-0.006683	-0.024328	0.034518	0.10481	-0.129345	0.826043
chr3L_9668705_9668933	chr3L_9668705_9668933	3	-0.164736	-0.245067	0.073046	0.031177	-0.027044	-0.02353	0.118248	0.010201	0.063964	0.001444	0.151082	0.099514	0.013382	0.027185	0.070465	0.084027	0.035769	0.061233	-0.0321	-0.066183	0.010475	0.117175	-0.169746	0.120271	0.02522	0.090472	0.014598	-0.000562	-0.037542	-0.052933	-0.026195	0.018712	-0.075744	-0.106466	0.056922	-0.078772	0.000406	-0.015419	-0.015855	0.019554	-0.035764	0.030021	0.018826	-0.003422	-0.110571	-0.30429	0.432016
chr3L_9685563_9686057	chr3L_9685563_9686057	3	-0.026916	-0.049877	0.079694	0.034276	0.098992	0.002756	0.083309	0.132981	0.038194	0.079383	0.112885	0.037989	0.017699	0.06572	0.280267	0.10666	0.000896	0.060644	0.0478	0.01531	0.026668	0.158759	0.095883	0.335337	0.229045	0.060349	0.034097	0.024286	-0.021453	0.036467	-0.035091	0.020402	0.027377	-0.100083	0.029117	0.165446	0.01688	-0.011605	0.040275	0.039869	0.024428	0.039206	0.045029	-0.013733	-0.033712	-0.093923	-0.192496
chr3L_9687428_9687872	chr3L_9687428_9687872	3	-0.230454	-0.110937	-0.004456	-0.005294	0.154308	-0.001863	0.222921	0.138398	0.018053	0.039407	0.223878	0.118904	0.118703	0.103274	-0.007786	0.107259	0.014387	0.063728	0.100149	0.026572	-0.062389	0.120166	0.068902	0.054309	0.240166	0.083344	0.057266	0.062449	0.051145	0.032252	-0.014398	0.062403	0.012421	-0.11197	-0.059437	0.059639	0.010613	0.002243	0.032725	-0.073869	0.019624	0.133745	-0.030911	0.048813	0.130076	-0.011135	1.09636
chr3L_9688438_9688707	chr3L_9688438_9688707	3	-0.299596	-0.105755	0.008488	-0.109416	0.076743	-0.022647	0.089917	0.148671	0.070196	-0.006038	0.092472	0.15375	0.113396	0.121398	0.040873	0.014204	-0.055355	0.040475	0.051514	0.034694	0.007423	0.070249	-0.097925	0.165474	0.005212	0.1463	0.035266	-0.007227	-0.01	-0.001796	-0.061197	0.010623	-0.095342	-0.124644	-0.050921	0.00395	0.001923	-0.004501	0.058784	-0.039479	0.028587	0.167657	0.007811	-0.018277	0.11492	-0.134361	0.8662
chr3L_9689568_9690288	chr3L_9689568_9690288	3	-0.147216	-0.124473	0.121125	-0.025197	0.094451	0.164975	0.480687	0.337223	0.202751	0.157246	0.142139	0.211099	0.120625	0.095713	0.311704	0.084243	0.133746	0.080618	0.107653	0.167182	0.135498	0.185447	0.177243	0.198417	0.132425	0.319506	0.146087	-0.020232	0.097013	-0.004271	0.019719	0.09823	-0.123205	-0.048987	-0.105673	-0.034912	0.015356	-0.052292	-0.019951	0.08382	0.093911	0.046363	0.057612	0.01312	0.056943	-0.140606	1.05012
chr3R_10104424_10104722	chr3R_10104424_10104722	3	-0.107417	-0.075256	0.213134	0.37199	0.218976	-0.010831	-0.017904	0.037079	-0.108515	-0.025487	0.005983	-0.006129	0.054216	0.003509	0.122192	0.026763	0.032351	0.038338	0.037095	0.008739	0.038724	0.066657	0.052814	0.216077	0.006584	0.111341	0.086971	0.054804	0.026946	0.052137	0.001357	-0.160436	0.007539	0.027922	0.185232	-0.065672	0.040607	-0.009428	-0.042947	0.063657	0.013865	0.159394	0.092005	0.020886	0.145197	0.105578	-0.200262
chr3R_10109139_10109333	chr3R_10109139_10109333	3	-0.371289	-0.299869	0.256527	0.431038	0.301292	0.164152	-0.048205	0.009871	-0.111502	-0.035472	0.047992	0.013337	0.073604	0.024807	0.031401	0.118412	0.112595	0.197835	0.109216	0.055877	0.215146	0.083106	0.307007	0.349989	0.144261	0.215365	0.17143	0.045087	0.073525	0.028575	0.038437	-0.259414	-0.207616	-0.149164	0.066301	-0.211878	-0.013491	-0.008179	-0.08882	0.080517	0.02595	0.033717	0.051401	0.027639	0.055418	-0.198203	0.22576
chr3R_10110863_10111174	chr3R_10110863_10111174	3	-0.259924	-0.245913	0.310012	0.430634	0.271368	0.077251	0.117702	0.109212	-0.01054	2.1e-05	0.025766	0.032891	0.035508	-0.013083	0.037552	0.055612	0.063723	0.134326	0.108176	0.0881	0.024791	0.025166	-0.07319	0.351057	0.135563	0.363159	0.21689	0.05814	0.085183	0.058311	0.042867	-0.158214	-0.042967	-0.060472	0.016815	-0.218693	-0.005756	-0.026789	-0.086074	-0.039853	0.006278	0.003664	-0.065671	0.018733	0.156274	-0.131818	0.409277
chr3R_10114809_10114979	chr3R_10114809_10114979	3	-0.270863	-0.248127	-0.001826	-0.032679	0.016171	0.103405	0.020256	0.054091	0.070553	-0.000636	0.037431	0.086406	0.050527	0.001913	-0.017735	0.039872	0.067671	0.109059	0.041397	0.050535	0.061351	0.157396	0.148605	0.102649	0.045495	0.105359	0.103775	0.002742	0.004186	-0.028556	-0.068967	-0.040222	-0.057752	-0.048015	0.024494	-0.006999	-0.001596	-0.001866	0.038081	0.012329	0.04307	0.035842	-0.020844	-0.04532	0.040328	-0.145936	0.498496
chr3R_10172627_10173072	chr3R_10172627_10173072	3	-0.170268	-0.010021	0.118606	0.003256	0.050392	-0.009824	-0.059116	0.044256	-0.01004	0.01136	0.052237	-0.023342	0.017485	-0.027873	0.051492	0.074262	0.035578	0.085849	0.099567	-0.031586	0.05518	0.108343	-0.105242	0.099981	0.163267	0.063533	0.059262	0.048538	-0.004641	0.045461	0.025297	-0.054586	-0.068454	0.007315	0.128628	0.104986	0.01382	0.010701	0.070891	0.002795	0.035483	0.049657	0.002534	0.057666	0.154774	0.140587	-0.127653
[truncated: 360 more rows]
[truncated: 20 more columns]

## Sheet: Mean scaled enrichment
	Class 1 (n=222)	Class 2 (n=82)	Class 3 (n=880)	max
Trl	0.808582	0.705834	0.796585	0.808582	1	1	1
H3K4me2	0.698334	0.47828	0.439432	0.698334	1	1	1
CBP	0.552636	0.61428	0.48958	0.61428	1	1	1
H3K18ac	1.05574	0	0.588503	1.05574	1	0	1
H3K4me3	0.835541	0.212318	0.404512	0.835541	1	0	1
H3K27ac	0.844602	0.00173848	0.381148	0.844602	1	0	0
[truncated: 61 more rows]
