# Supplementary material for: Atrophin controls developmental signaling pathways via interactions with Trithorax-like
Source: eLife journal article supplement (doi:10.7554/elife.23084), 2017-03-22
Supplement: supp [file elife-23084-supp-v1.zip › elife_poa_e23084_Figure_5_Source_Data_1.xlsx]

## Sheet: -log(pvalue)
All Atro Peaks	Atro Intersect Trl	Atro Not Intersect Trl
184.748	184.748	134.365
150.297	150.297	131.676
149.346	149.346	126.364
139.149	139.149	126.024
137.477	137.477	125.998
134.365	127.593	124.287
131.676	123.215	120.012
127.593	122.136	117.675
126.364	121.964	114.842
126.024	121.443	108.741
125.998	119.937	97.8372
124.287	119.334	96.3287
123.215	118.999	95.603
122.136	118.861	93.1011
121.964	117.369	92.6643
121.443	116.65	88.6935
120.012	114.819	88.3514
119.937	113.772	86.0573
119.334	113.657	85.1892
118.999	111.818	84.4366
118.861	109.319	83.7212
117.675	109.16	82.2125
117.369	107.094	81.7174
116.65	106.594	81.2243
114.842	106.404	80.5753
114.819	105.75	80.4981
113.772	104.429	79.3654
113.657	103.82	78.6919
111.818	102.535	77.1031
109.319	102.256	76.5851
109.16	101.373	71.3287
108.741	101.104	69.5986
107.094	100.49	68.7397
106.594	100.45	67.5029
106.404	100.161	67.084
105.75	97.2144	65.982
104.429	95.2663	65.9073
103.82	95.2268	64.7668
102.535	95.0918	63.8829
102.256	94.682	63.4443
101.373	94.581	62.3522
101.104	94.4544	61.3107
100.49	93.7582	60.4154
100.45	93.2766	60.1383
100.161	93.0097	60.0344
97.8372	92.5519	59.9662
97.2144	92.3474	57.0441
96.3287	91.3275	55.3357
95.603	91.1944	54.8651
95.2663	90.7362	54.8539
95.2268	90.5055	54.4132
95.0918	90.4506	54.304
94.682	90.436	52.4455
94.581	90.0375	50.9335
94.4544	89.4162	49.8109
93.7582	89.3202	49.7976
93.2766	88.6474	45.9043
93.1011	88.4418	44.1938
93.0097	88.1926	43.641
92.6643	88.0091	41.1926
92.5519	87.1126	41.1551
92.3474	86.9031	40.2819
91.3275	85.9798	39.5848
91.1944	85.7918	36.9723
90.7362	85.6186	36.5892
90.5055	84.7743	35.5221
90.4506	84.6397	34.4168
90.436	84.1857	33.9431
90.0375	83.8436	33.1927
89.4162	83.7657	32.889
89.3202	83.4271	32.2503
88.6935	83.1569	31.9323
88.6474	82.7443	31.7616
88.4418	82.2104	30.2647
88.3514	81.0742	29.842
88.1926	79.6926	29.405
88.0091	79.63	29.3851
87.1126	79.3141	29.3028
86.9031	79.2664	28.1678
86.0573	78.8155	27.8928
85.9798	78.4416	27.8238
85.7918	78.2931	26.9732
85.6186	77.6019	26.3769
85.1892	77.2837	26.2077
84.7743	77.1785	26.1378
84.6397	76.8765	26.1209
84.4366	76.6209	26.0211
84.1857	76.4921	26.0122
83.8436	76.2427	25.7501
83.7657	75.9247	25.6616
83.7212	75.7489	25.5325
83.4271	75.7168	25.4492
83.1569	75.121	25.0646
82.7443	74.9692	24.9356
82.2125	74.9039	24.9207
82.2104	74.8206	24.8068
81.7174	74.4792	24.7416
81.2243	74.4402	24.415
81.0742	74.2797	24.3495
80.5753	74.1633	24.2446
80.4981	74.1325	24.0231
79.6926	74.0097	23.9802
79.63	73.8587	23.9763
79.3654	72.8483	23.4903
79.3141	72.1722	23.4012
79.2664	72.0956	23.3688
78.8155	71.9172	23.065
78.6919	71.7993	22.9392
78.4416	71.6413	22.6641
78.2931	71.4922	22.5345
77.6019	70.7504	22.4654
77.2837	70.6002	22.3774
77.1785	70.5345	22.3211
77.1031	70.2876	22.2101
76.8765	70.2673	22.0577
76.6209	70.1335	21.926
76.5851	70.1035	21.6251
76.4921	70.0711	21.5783
76.2427	70.0368	21.4919
75.9247	69.8068	21.3551
75.7489	69.3522	20.9093
75.7168	68.739	20.5727
75.121	68.7245	20.54
74.9692	68.6756	20.4918
74.9039	68.5002	20.4086
74.8206	68.4271	20.3991
74.4792	68.3502	20.2634
74.4402	68.248	20.1891
74.2797	68.1881	20.1619
74.1633	68.0239	20.1282
74.1325	67.6635	20.0932
74.0097	67.6106	19.9275
73.8587	67.5436	19.8903
72.8483	67.3954	19.4214
72.1722	66.9898	19.2844
72.0956	66.8228	19.1114
71.9172	66.7943	19.0864
71.7993	66.5522	19.053
71.6413	65.1349	18.9734
71.4922	64.6364	18.91
71.3287	64.5907	18.7692
70.7504	64.544	18.6042
70.6002	64.3397	18.5644
70.5345	64.3173	18.4413
70.2876	64.0539	18.4119
70.2673	63.9785	18.4031
70.1335	63.3571	18.3791
70.1035	63.3371	18.3564
70.0711	63.2152	18.3324
70.0368	63.1598	18.2626
69.8068	63.0232	18.0789
69.5986	62.9073	18.0721
69.3522	62.6366	17.8861
68.7397	62.5145	17.8421
68.739	62.4373	17.789
68.7245	62.2732	17.7831
68.6756	62.1052	17.7149
68.5002	61.9766	17.6795
68.4271	61.6522	17.6736
68.3502	61.6372	17.6068
68.248	61.0333	17.5969
68.1881	60.8353	17.5915
68.0239	60.8168	17.5627
67.6635	60.8162	17.4752
67.6106	60.6841	17.4487
67.5436	60.6554	17.3846
67.5029	60.6449	17.3367
67.3954	60.5085	17.183
67.084	60.4568	17.0836
66.9898	60.2424	17.0309
66.8228	60.2203	16.94
66.7943	60.123	16.8728
66.5522	59.9874	16.8498
65.982	59.8608	16.7526
65.9073	59.7872	16.591
65.1349	59.7808	16.5689
64.7668	59.5527	16.5218
64.6364	59.3184	16.3984
64.5907	59.2941	16.3459
64.544	59.133	16.3242
64.3397	59.0816	16.0185
64.3173	59.0771	15.5022
64.0539	58.9362	15.4803
63.9785	58.4884	15.4751
63.8829	58.3836	15.4023
63.4443	58.3386	15.3881
63.3571	58.2954	15.0788
63.3371	58.2045	15.0559
63.2152	58.0911	15.0041
63.1598	58.0501	14.9986
63.0232	57.9119	14.8952
62.9073	57.8376	14.7954
62.6366	57.6189	14.6918
62.5145	57.556	14.5907
62.4373	57.4842	14.5182
62.3522	57.2428	14.3669
62.2732	56.9959	14.242
62.1052	56.894	14.2325
61.9766	56.6303	14.0662
61.6522	56.6211	13.9835
61.6372	56.5671	13.9726
61.3107	56.3084	13.7325
61.0333	56.1105	13.6985
60.8353	56.0328	13.6538
60.8168	55.6895	13.5027
60.8162	55.5308	13.3715
60.6841	55.3461	13.1852
60.6554	55.065	13.1788
60.6449	54.9308	13.1224
60.5085	54.9284	12.8993
60.4568	54.8952	12.855
60.4154	54.6558	12.6793
60.2424	54.5857	12.6501
60.2203	54.4423	12.596
60.1383	54.2888	12.5458
60.123	54.2809	12.4426
60.0344	54.2699	12.175
59.9874	54.2313	12.0771
59.9662	54.2234	11.9751
59.8608	54.1458	11.8847
59.7872	54.0712	11.8039
59.7808	53.7629	11.7501
59.5527	53.7622	11.6901
59.3184	53.7246	11.6146
59.2941	53.6657	11.3941
59.133	53.6107	11.3303
59.0816	53.5838	11.3094
59.0771	53.37	11.0417
58.9362	53.3178	11.0214
58.4884	53.0747	10.9288
58.3836	52.9691	10.8994
58.3386	52.8556	10.8738
58.2954	52.8525	10.827
58.2045	52.7252	10.3807
58.0911	52.4571	10.0848
58.0501	52.4511	10.0135
57.9119	52.451	9.99813
57.8376	52.3239	9.87889
57.6189	52.2866	9.8038
57.556	52.2415	9.52447
57.4842	52.1208	9.40242
57.2428	51.8575	9.36641
57.0441	51.8043	9.35319
56.9959	51.4802	9.34831
56.894	51.3903	9.15935
56.6303	51.3643	8.34718
56.6211	51.3129	8.31691
56.5671	51.1962	8.28381
56.3084	50.5542	8.17711
56.1105	50.4219	8.17073
56.0328	50.2279	7.92084
55.6895	50.1356	7.74429
55.5308	50.0695	7.71039
55.3461	50.0671	7.42189
55.3357	49.9915
55.065	49.7764
54.9308	49.6861
54.9284	49.6368
54.8952	49.6047
54.8651	49.5337
54.8539	49.5248
54.6558	49.4809
54.5857	49.4013
54.4423	49.3641
54.4132	49.31
54.304	49.2344
54.2888	49.1724
54.2809	49.0701
54.2699	49.0609
54.2313	48.9523
54.2234	48.8861
54.1458	48.8532
54.0712	48.8476
53.7629	48.8201
53.7622	48.744
53.7246	48.7205
53.6657	48.66
53.6107	48.3392
53.5838	48.0747
53.37	48.037
53.3178	47.9825
53.0747	47.9305
52.9691	47.9081
52.8556	47.8031
52.8525	47.7577
52.7252	47.755
52.4571	47.7351
52.4511	47.6539
52.451	47.54
52.4455	47.393
52.3239	47.3535
52.2866	47.3053
52.2415	47.2609
52.1208	47.2574
51.8575	47.1712
51.8043	47.0883
51.4802	46.866
51.3903	46.7665
51.3643	46.5927
51.3129	46.5419
51.1962	46.4682
50.9335	46.4199
50.5542	46.307
50.4219	46.3034
50.2279	46.059
50.1356	46.0469
50.0695	46.0135
50.0671	45.9862
49.9915	45.778
49.8109	45.7443
49.7976	45.5395
49.7764	45.4792
49.6861	45.4585
49.6368	45.3267
49.6047	45.1469
49.5337	45.0989
49.5248	45.0866
49.4809	44.617
49.4013	44.5645
49.3641	44.4819
49.31	44.4395
49.2344	44.4143
49.1724	44.404
49.0701	44.362
49.0609	44.2413
48.9523	44.1936
48.8861	44.1719
48.8532	44.0286
48.8476	44.0083
48.8201	43.8986
48.744	43.6365
48.7205	43.6094
48.66	43.598
48.3392	43.5236
48.0747	43.3964
48.037	43.3028
47.9825	43.2546
47.9305	43.2497
47.9081	43.2468
47.8031	43.2335
47.7577	43.1701
47.755	42.9977
47.7351	42.8601
47.6539	42.8172
47.54	42.6526
47.393	42.6442
47.3535	42.6348
47.3053	42.4274
47.2609	42.2802
47.2574	42.2071
47.1712	42.1687
47.0883	42.1326
46.866	42.078
46.7665	42.0562
46.5927	42.0473
46.5419	42.0096
46.4682	41.9737
46.4199	41.9524
46.307	41.931
46.3034	41.8854
46.059	41.844
46.0469	41.7693
46.0135	41.6297
45.9862	41.4972
45.9043	41.4766
45.778	41.2549
45.7443	41.2426
45.5395	41.2347
45.4792	41.2212
45.4585	41.0899
45.3267	41.0664
45.1469	40.9867
45.0989	40.9037
45.0866	40.8732
44.617	40.8208
44.5645	40.8022
44.4819	40.7783
44.4395	40.7216
44.4143	40.6989
44.404	40.6565
44.362	40.5824
44.2413	40.5756
44.1938	40.5223
44.1936	40.5025
44.1719	40.2845
44.0286	40.2772
44.0083	40.2302
43.8986	40.2291
43.641	40.1564
43.6365	40.0581
43.6094	40.0322
43.598	39.9602
43.5236	39.9253
43.3964	39.9116
43.3028	39.8693
43.2546	39.868
43.2497	39.8637
43.2468	39.844
43.2335	39.8328
43.1701	39.8327
42.9977	39.8095
42.8601	39.7055
42.8172	39.671
42.6526	39.576
42.6442	39.5437
42.6348	39.477
42.4274	39.4583
42.2802	39.2032
42.2071	39.0321
42.1687	38.7306
42.1326	38.6299
42.078	38.5716
42.0562	38.5578
42.0473	38.5472
42.0096	38.4545
41.9737	38.2283
41.9524	38.0286
41.931	37.9587
41.8854	37.8687
41.844	37.8155
41.7693	37.8009
41.6297	37.7647
41.4972	37.6665
41.4766	37.6627
41.2549	37.493
41.2426	37.4566
41.2347	37.4479
41.2212	37.3837
41.1926	37.3711
41.1551	37.3196
41.0899	37.2153
41.0664	37.1666
40.9867	36.7352
40.9037	36.7311
40.8732	36.7228
40.8208	36.7094
40.8022	36.6369
40.7783	36.6217
40.7216	36.6152
40.6989	36.6007
40.6565	36.5905
40.5824	36.4209
40.5756	36.3978
40.5223	36.3827
40.5025	36.3809
40.2845	36.3674
40.2819	36.0701
40.2772	35.985
40.2302	35.9618
40.2291	35.9408
40.1564	35.9226
40.0581	35.9189
40.0322	35.8494
39.9602	35.8441
39.9253	35.8286
39.9116	35.7361
39.8693	35.7239
39.868	35.6798
39.8637	35.679
39.844	35.6159
39.8328	35.5654
39.8327	35.5569
39.8095	35.515
39.7055	35.4887
39.671	35.4817
39.5848	35.3787
39.576	35.3359
39.5437	35.1092
39.477	35.0827
39.4583	35.0336
39.2032	35.0281
39.0321	35.0243
38.7306	34.964
38.6299	34.9273
38.5716	34.8662
38.5578	34.763
38.5472	34.739
38.4545	34.699
38.2283	34.5723
38.0286	34.5335
37.9587	34.4959
37.8687	34.3768
37.8155	34.2943
37.8009	34.2848
37.7647	34.2001
37.6665	34.1118
37.6627	34.0594
37.493	33.9732
37.4566	33.6652
37.4479	33.5147
37.3837	33.5138
37.3711	33.3917
37.3196	33.3477
37.2153	33.3385
37.1666	33.2926
36.9723	33.2637
36.7352	33.2571
36.7311	33.2081
36.7228	33.1768
36.7094	33.1435
36.6369	33.0644
36.6217	33.0223
36.6152	32.9764
36.6007	32.9442
36.5905	32.791
36.5892	32.7533
36.4209	32.7265
36.3978	32.7253
36.3827	32.6563
36.3809	32.629
36.3674	32.5827
36.0701	32.4509
35.985	32.4381
35.9618	32.434
35.9408	32.4096
35.9226	32.214
35.9189	32.0987
35.8494	32.0509
35.8441	32.0151
35.8286	31.9421
35.7361	31.9046
35.7239	31.9012
35.6798	31.842
35.679	31.8344
35.6159	31.8224
35.5654	31.7749
35.5569	31.7293
35.5221	31.6445
35.515	31.6305
35.4887	31.6264
35.4817	31.5243
35.3787	31.5135
35.3359	31.4327
35.1092	31.4148
35.0827	31.3868
35.0336	31.3528
35.0281	31.2817
35.0243	31.2716
34.964	31.2053
34.9273	31.1246
34.8662	31.0997
34.763	31.0874
34.739	31.0485
34.699	30.9539
34.5723	30.9468
34.5335	30.8974
34.4959	30.889
34.4168	30.7408
34.3768	30.6601
34.2943	30.6262
34.2848	30.5904
34.2001	30.4567
34.1118	30.3196
34.0594	30.287
33.9732	30.1685
33.9431	30.16
33.6652	30.1568
33.5147	30.1535
33.5138	30.1118
33.3917	30.0287
33.3477	29.9562
33.3385	29.8415
33.2926	29.7011
33.2637	29.6835
33.2571	29.6664
33.2081	29.5551
33.1927	29.5211
33.1768	29.5187
33.1435	29.4975
33.0644	29.48
33.0223	29.4259
32.9764	29.3875
32.9442	29.297
32.889	29.2165
32.791	29.1321
32.7533	29.0204
32.7265	28.8169
32.7253	28.8031
32.6563	28.7484
32.629	28.7403
32.5827	28.7083
32.4509	28.7009
32.4381	28.5941
32.434	28.5574
32.4096	28.5322
32.2503	28.4825
32.214	28.4523
32.0987	28.4346
32.0509	28.4143
32.0151	28.401
31.9421	28.3472
31.9323	28.3449
31.9046	28.311
31.9012	28.2636
31.842	28.2197
31.8344	28.1895
31.8224	28.1617
31.7749	28.1147
31.7616	28.0741
31.7293	28.0371
31.6445	27.9706
31.6305	27.8563
31.6264	27.8492
31.5243	27.8194
31.5135	27.7878
31.4327	27.7038
31.4148	27.6883
31.3868	27.6864
31.3528	27.6849
31.2817	27.6628
31.2716	27.379
31.2053	27.3658
31.1246	27.3609
31.0997	27.3188
31.0874	27.2748
31.0485	27.231
30.9539	27.2263
30.9468	27.1293
30.8974	27.0326
30.889	27.0072
30.7408	26.9508
30.6601	26.9426
30.6262	26.8732
30.5904	26.8518
30.4567	26.6951
30.3196	26.6453
30.287	26.6222
30.2647	26.6079
30.1685	26.5537
30.16	26.5207
30.1568	26.5083
30.1535	26.478
30.1118	26.4312
30.0287	26.3822
29.9562	26.3219
29.842	26.2688
29.8415	26.2304
29.7011	26.2264
29.6835	26.2229
29.6664	26.1768
29.5551	26.1589
29.5211	26.1144
29.5187	26.0428
29.4975	26.0049
29.48	25.9722
29.4259	25.9626
29.405	25.9081
29.3875	25.8717
29.3851	25.8347
29.3028	25.8241
29.297	25.7683
29.2165	25.7387
29.1321	25.6983
29.0204	25.6878
28.8169	25.6607
28.8031	25.6377
28.7484	25.6234
28.7403	25.5306
28.7083	25.499
28.7009	25.4989
28.5941	25.4959
28.5574	25.4538
28.5322	25.3818
28.4825	25.31
28.4523	25.3097
28.4346	25.2223
28.4143	25.2099
28.401	25.2001
28.3472	25.1942
28.3449	25.1644
28.311	25.0697
28.2636	24.9484
28.2197	24.9044
28.1895	24.7297
28.1678	24.5659
28.1617	24.5481
28.1147	24.5
28.0741	24.4967
28.0371	24.4925
27.9706	24.4278
27.8928	24.3998
27.8563	24.3821
27.8492	24.3432
27.8238	24.292
27.8194	24.1254
27.7878	24.0979
27.7038	24.0261
27.6883	24.0227
27.6864	23.9881
27.6849	23.9812
27.6628	23.8845
27.379	23.8457
27.3658	23.7966
27.3609	23.7851
27.3188	23.6939
27.2748	23.6756
27.231	23.6408
27.2263	23.5562
27.1293	23.5424
27.0326	23.5373
27.0072	23.5282
26.9732	23.5225
26.9508	23.5063
26.9426	23.4212
26.8732	23.4182
26.8518	23.382
26.6951	23.3762
26.6453	23.3613
26.6222	23.3312
26.6079	23.3132
26.5537	23.2571
26.5207	23.1654
26.5083	23.1128
26.478	23.1117
26.4312	23.0852
26.3822	23.0615
26.3769	23.0524
26.3219	23.0483
26.2688	23.0469
26.2304	23.0232
26.2264	23.0171
26.2229	23.0041
26.2077	22.9967
26.1768	22.9958
26.1589	22.9689
26.1378	22.9481
26.1209	22.9366
26.1144	22.9157
26.0428	22.9045
26.0211	22.884
26.0122	22.8747
26.0049	22.8203
25.9722	22.7963
25.9626	22.7877
25.9081	22.766
25.8717	22.751
25.8347	22.6931
25.8241	22.6498
25.7683	22.5966
25.7501	22.5868
25.7387	22.5589
25.6983	22.5538
25.6878	22.5462
25.6616	22.5427
25.6607	22.5
25.6377	22.4928
25.6234	22.4051
25.5325	22.3971
25.5306	22.377
25.499	22.373
25.4989	22.2915
25.4959	22.267
25.4538	22.2326
25.4492	22.1674
25.3818	22.151
25.31	22.1134
25.3097	22.1108
25.2223	22.1008
25.2099	22.0447
25.2001	22.0173
25.1942	22.0108
25.1644	22.0016
25.0697	21.9622
25.0646	21.858
24.9484	21.8552
24.9356	21.8429
24.9207	21.8266
24.9044	21.8036
24.8068	21.7512
24.7416	21.6964
24.7297	21.6622
24.5659	21.6593
24.5481	21.6491
24.5	21.6387
24.4967	21.6227
24.4925	21.6084
24.4278	21.6047
24.415	21.6032
24.3998	21.5762
24.3821	21.5386
24.3495	21.4801
24.3432	21.4617
24.292	21.4609
24.2446	21.4596
24.1254	21.4476
24.0979	21.4434
24.0261	21.3608
24.0231	21.3541
24.0227	21.3278
23.9881	21.2946
23.9812	21.2586
23.9802	21.2337
23.9763	21.1722
23.8845	21.1484
23.8457	21.0724
23.7966	21.0218
23.7851	21.0053
23.6939	20.9688
23.6756	20.9575
23.6408	20.919
23.5562	20.887
23.5424	20.8747
23.5373	20.8203
23.5282	20.8036
23.5225	20.7997
23.5063	20.7462
23.4903	20.6932
23.4212	20.6864
23.4182	20.6764
23.4012	20.663
23.382	20.6126
23.3762	20.6119
23.3688	20.5621
23.3613	20.4533
23.3312	20.4447
23.3132	20.4275
23.2571	20.4186
23.1654	20.3986
23.1128	20.3392
23.1117	20.3225
23.0852	20.197
23.065	20.1548
23.0615	20.1467
23.0524	20.1418
23.0483	20.101
23.0469	20.0877
23.0232	20.0739
23.0171	20.0627
23.0041	20.0535
22.9967	20.0403
22.9958	20.0211
22.9689	19.985
22.9481	19.9202
22.9392	19.9167
22.9366	19.9154
22.9157	19.8846
22.9045	19.7433
22.884	19.7384
22.8747	19.679
22.8203	19.6716
22.7963	19.6371
22.7877	19.6343
22.766	19.6254
22.751	19.6245
22.6931	19.6148
22.6641	19.6026
22.6498	19.5391
22.5966	19.396
22.5868	19.3868
22.5589	19.3662
22.5538	19.3507
22.5462	19.2983
22.5427	19.2657
22.5345	19.2519
22.5	19.2472
22.4928	19.2103
22.4654	19.2074
22.4051	19.1916
22.3971	19.1889
22.3774	19.1608
22.377	19.1502
22.373	19.1166
22.3211	19.1128
22.2915	19.0974
22.267	19.0813
22.2326	19.0543
22.2101	19.0459
22.1674	18.9837
22.151	18.9398
22.1134	18.9349
22.1108	18.9247
22.1008	18.8822
22.0577	18.8639
22.0447	18.8289
22.0173	18.7802
22.0108	18.6861
22.0016	18.6695
21.9622	18.5941
21.926	18.5902
21.858	18.5848
21.8552	18.5844
21.8429	18.4876
21.8266	18.4655
21.8036	18.4603
21.7512	18.4404
21.6964	18.4005
21.6622	18.3932
21.6593	18.3671
21.6491	18.2968
21.6387	18.2793
21.6251	18.2706
21.6227	18.2171
21.6084	18.1875
21.6047	18.1702
21.6032	18.1488
21.5783	18.1101
21.5762	18.0937
21.5386	18.0882
21.4919	18.0777
21.4801	18.0572
21.4617	18.038
21.4609	18.0021
21.4596	17.978
21.4476	17.9696
21.4434	17.9657
21.3608	17.9518
21.3551	17.9395
21.3541	17.9289
21.3278	17.9256
21.2946	17.8511
21.2586	17.8454
21.2337	17.8146
21.1722	17.7806
21.1484	17.7623
21.0724	17.7618
21.0218	17.7335
21.0053	17.6359
20.9688	17.5375
20.9575	17.5367
20.919	17.4706
20.9093	17.4471
20.887	17.4326
20.8747	17.4066
20.8203	17.3427
20.8036	17.3342
20.7997	17.2775
20.7462	17.2192
20.6932	17.209
20.6864	17.1733
20.6764	17.1025
20.663	17.0333
20.6126	16.9913
20.6119	16.9424
20.5727	16.9313
20.5621	16.8844
20.54	16.8497
20.4918	16.8452
20.4533	16.8248
20.4447	16.713
20.4275	16.6722
20.4186	16.6503
20.4086	16.608
20.3991	16.6058
20.3986	16.5884
20.3392	16.5805
20.3225	16.2942
20.2634	16.2429
20.197	16.2332
20.1891	16.2075
20.1619	16.2054
20.1548	16.1409
20.1467	16.1374
20.1418	16.1222
20.1282	16.1103
20.101	16.0846
20.0932	16.0286
20.0877	15.9883
20.0739	15.9871
20.0627	15.822
20.0535	15.8126
20.0403	15.7726
20.0211	15.7592
19.985	15.7371
19.9275	15.7088
19.9202	15.6823
19.9167	15.6772
19.9154	15.596
19.8903	15.5925
19.8846	15.5722
19.7433	15.5213
19.7384	15.5071
19.679	15.4936
19.6716	15.4851
19.6371	15.463
19.6343	15.3886
19.6254	15.3743
19.6245	15.3391
19.6148	15.2965
19.6026	15.2886
19.5391	15.2628
19.4214	15.2278
19.396	15.2166
19.3868	15.1284
19.3662	15.1138
19.3507	15.1086
19.2983	15.0575
19.2844	15.0289
19.2657	15.0229
19.2519	15.0086
19.2472	14.981
19.2103	14.9727
19.2074	14.911
19.1916	14.8795
19.1889	14.8061
19.1608	14.7974
19.1502	14.7791
19.1166	14.7626
19.1128	14.7331
19.1114	14.6307
19.0974	14.5938
19.0864	14.5926
19.0813	14.5738
19.0543	14.4586
19.053	14.4418
19.0459	14.4415
18.9837	14.4266
18.9734	14.3005
18.9398	14.2548
18.9349	14.2432
18.9247	14.1634
18.91	14.1578
18.8822	14.1536
18.8639	14.121
18.8289	14.0999
18.7802	14.0296
18.7692	14.001
18.6861	13.9972
18.6695	13.9501
18.6042	13.939
18.5941	13.9245
18.5902	13.878
18.5848	13.8105
18.5844	13.7561
18.5644	13.7426
18.4876	13.682
18.4655	13.6561
18.4603	13.6522
18.4413	13.6448
18.4404	13.6408
18.4119	13.6328
18.4031	13.6326
18.4005	13.6204
18.3932	13.5627
18.3791	13.5551
18.3671	13.351
18.3564	13.3385
18.3324	13.3002
18.2968	13.2668
18.2793	13.015
18.2706	13.0124
18.2626	12.996
18.2171	12.9511
18.1875	12.8533
18.1702	12.8522
18.1488	12.8145
18.1101	12.7978
18.0937	12.7973
18.0882	12.785
18.0789	12.7849
18.0777	12.7425
18.0721	12.739
18.0572	12.7226
18.038	12.6907
18.0021	12.6342
17.978	12.6097
17.9696	12.5505
17.9657	12.5187
17.9518	12.4505
17.9395	12.4497
17.9289	12.4058
17.9256	12.3894
17.8861	12.3479
17.8511	12.3472
17.8454	12.3472
17.8421	12.3227
17.8146	12.3019
17.789	12.2672
17.7831	12.2082
17.7806	12.1614
17.7623	12.1404
17.7618	12.1184
17.7335	12.0581
17.7149	11.9888
17.6795	11.9658
17.6736	11.9146
17.6359	11.9144
17.6068	11.7692
17.5969	11.7233
17.5915	11.7233
17.5627	11.6707
17.5375	11.6576
17.5367	11.5189
17.4752	11.4194
17.4706	11.3956
17.4487	11.3697
17.4471	11.2944
17.4326	11.2493
17.4066	11.2486
17.3846	11.2479
17.3427	11.1631
17.3367	11.1155
17.3342	11.0518
17.2775	11.0366
17.2192	11.0182
17.209	10.9145
17.183	10.8889
17.1733	10.8479
17.1025	10.845
17.0836	10.8159
17.0333	10.8025
17.0309	10.6593
16.9913	10.6579
16.9424	10.6173
16.94	10.5726
16.9313	10.5064
16.8844	10.4101
16.8728	10.2827
16.8498	10.0714
16.8497	10.0656
16.8452	9.97441
16.8248	9.96513
16.7526	9.79
16.713	9.78554
16.6722	9.68057
16.6503	9.33728
16.608	8.85658
16.6058	8.83696
16.591	8.6028
16.5884	8.33337
16.5805	7.41661
16.5689	7.3456
16.5218	7.17571
16.3984	6.78073
16.3459
16.3242
16.2942
16.2429
16.2332
16.2075
16.2054
16.1409
16.1374
16.1222
16.1103
16.0846
16.0286
16.0185
15.9883
15.9871
15.822
15.8126
15.7726
15.7592
15.7371
15.7088
15.6823
15.6772
15.596
15.5925
15.5722
15.5213
15.5071
15.5022
15.4936
15.4851
15.4803
15.4751
15.463
15.4023
15.3886
15.3881
15.3743
15.3391
15.2965
15.2886
15.2628
15.2278
15.2166
15.1284
15.1138
15.1086
15.0788
15.0575
15.0559
15.0289
15.0229
15.0086
15.0041
14.9986
14.981
14.9727
14.911
14.8952
14.8795
14.8061
14.7974
14.7954
14.7791
14.7626
14.7331
14.6918
14.6307
14.5938
14.5926
14.5907
14.5738
14.5182
14.4586
14.4418
14.4415
14.4266
14.3669
14.3005
14.2548
14.2432
14.242
14.2325
14.1634
14.1578
14.1536
14.121
14.0999
14.0662
14.0296
14.001
13.9972
13.9835
13.9726
13.9501
13.939
13.9245
13.878
13.8105
13.7561
13.7426
13.7325
13.6985
13.682
13.6561
13.6538
13.6522
13.6448
13.6408
13.6328
13.6326
13.6204
13.5627
13.5551
13.5027
13.3715
13.351
13.3385
13.3002
13.2668
13.1852
13.1788
13.1224
13.015
13.0124
12.996
12.9511
12.8993
12.855
12.8533
12.8522
12.8145
12.7978
12.7973
12.785
12.7849
12.7425
12.739
12.7226
12.6907
12.6793
12.6501
12.6342
12.6097
12.596
12.5505
12.5458
12.5187
12.4505
12.4497
12.4426
12.4058
12.3894
12.3479
12.3472
12.3472
12.3227
12.3019
12.2672
12.2082
12.175
12.1614
12.1404
12.1184
12.0771
12.0581
11.9888
11.9751
11.9658
11.9146
11.9144
11.8847
11.8039
11.7692
11.7501
11.7233
11.7233
11.6901
11.6707
11.6576
11.6146
11.5189
11.4194
11.3956
11.3941
11.3697
11.3303
11.3094
11.2944
11.2493
11.2486
11.2479
11.1631
11.1155
11.0518
11.0417
11.0366
11.0214
11.0182
10.9288
10.9145
10.8994
10.8889
10.8738
10.8479
10.845
10.827
10.8159
10.8025
10.6593
10.6579
10.6173
10.5726
10.5064
10.4101
10.3807
10.2827
10.0848
10.0714
10.0656
10.0135
9.99813
9.97441
9.96513
9.87889
9.8038
9.79
9.78554
9.68057
9.52447
9.40242
9.36641
9.35319
9.34831
9.33728
9.15935
8.85658
8.83696
8.6028
8.34718
8.33337
8.31691
8.28381
8.17711
8.17073
7.92084
7.74429
7.71039
7.42189
7.41661
7.3456
7.17571
6.78073

## Sheet: fold enrichment
All Atro Peaks	Atro Intersect Trl	Atro Not Intersect Trl
24.8176	24.8176	19.4247
28.5291	28.5291	18.3345
34.0294	34.0294	16.132
16.2519	16.2519	17.2326
16.7668	16.7668	17.1715
19.4247	14.389	10.8936
18.3345	18.3719	15.7685
14.389	11.2222	21.0605
16.132	18.2629	13.9106
17.2326	14.466	12.7859
17.1715	16.7439	11.1365
10.8936	15.9976	6.16779
18.3719	14.3054	6.41432
11.2222	18.5874	7.71313
18.2629	18.2175	14.2989
14.466	16.889	5.8147
15.7685	16.6034	6.62929
16.7439	17.4454	12.479
15.9976	16.2262	5.32089
14.3054	13.7172	5.24527
18.5874	22.5068	5.44754
21.0605	25.8178	10.4861
18.2175	11.6274	9.52811
16.889	26.6539	17.5919
13.9106	12.9418	16.0524
16.6034	7.42763	5.11027
17.4454	22.411	18.0072
16.2262	8.4857	6.11866
13.7172	18.6957	4.84684
22.5068	23.9411	15.779
25.8178	23.8414	5.27026
12.7859	12.2149	6.25181
11.6274	16.5228	4.34552
26.6539	18.4779	11.5631
12.9418	17.9938	4.28369
7.42763	17.0624	4.16727
22.411	10.9915	18.064
8.4857	13.9899	12.0535
18.6957	24.1026	15.8519
23.9411	12.2094	6.82878
23.8414	17.8154	10.8983
12.2149	12.4748	11.1593
16.5228	15.8125	6.27822
18.4779	15.9148	4.37198
17.9938	16.317	13.7981
11.1365	15.0346	9.98713
17.0624	19.1314	4.02977
6.16779	14.5356	14.4614
6.41432	15.9582	9.45204
10.9915	17.27	15.031
13.9899	10.9812	8.99357
24.1026	17.9189	9.92156
12.2094	12.7889	5.58205
17.8154	17.3353	3.73629
12.4748	15.4265	12.6783
15.8125	23.4456	8.92092
15.9148	13.7466	8.78081
7.71313	21.0257	7.53379
16.317	16.6569	8.04948
14.2989	20.9999	14.0183
15.0346	17.726	7.08735
19.1314	18.451	14.1307
14.5356	11.0785	13.4051
15.9582	16.6772	11.1992
17.27	13.8259	5.29159
10.9812	17.201	12.7166
17.9189	13.9656	5.27015
12.7889	10.0607	4.28345
17.3353	16.5131	8.17398
15.4265	15.2979	7.64507
23.4456	15.7993	5.08683
5.8147	19.7355	6.77864
13.7466	23.7897	8.04407
21.0257	18.6504	9.4413
6.62929	18.2977	7.98608
16.6569	20.7004	7.83732
20.9999	21.4753	8.87513
17.726	17.5387	10.6197
18.451	20.4519	10.5406
12.479	18.2744	10.4038
11.0785	11.9694	10.508
16.6772	11.952	6.59149
13.8259	12.17	8.22936
5.32089	17.4908	10.738
17.201	11.0954	4.91916
13.9656	12.1684	7.2035
5.24527	17.5903	9.3757
10.0607	12.8877	6.66286
16.5131	14.2303	7.78274
15.2979	18.203	10.5024
5.44754	16.0096	7.98153
15.7993	5.45781	8.00548
19.7355	15.7049	6.33758
23.7897	17.2309	8.83205
10.4861	15.2742	6.49835
18.6504	9.07514	9.67251
9.52811	12.3132	6.40364
17.5919	15.3057	6.69936
18.2977	15.8042	8.63868
16.0524	14.9651	10.0284
5.11027	15.6078	9.44632
20.7004	17.3602	9.4054
21.4753	16.9212	5.89414
18.0072	11.839	8.58004
17.5387	4.75028	4.92587
20.4519	20.497	9.71213
18.2744	14.0895	6.61776
6.11866	13.232	6.85579
11.9694	17.2839	6.34025
11.952	15.4104	8.1919
12.17	14.4904	7.05446
17.4908	18.6789	6.73693
11.0954	18.4581	6.36022
4.84684	10.9835	4.47235
12.1684	12.7911	6.03718
17.5903	16.8163	8.7496
15.779	12.202	4.55846
12.8877	13.7254	8.9418
14.2303	19.7534	3.42904
18.203	17.6207	8.88363
16.0096	15.0712	8.98724
5.45781	14.2737	5.87456
15.7049	11.0036	5.93874
17.2309	14.1933	6.89235
15.2742	16.5663	6.3265
9.07514	19.9234	5.79025
12.3132	14.7106	6.92504
15.3057	17.3204	7.13555
15.8042	16.7417	8.00097
14.9651	18.9765	5.94332
15.6078	16.1841	7.92725
17.3602	17.476	8.35783
16.9212	16.7734	7.61272
11.839	17.1001	5.86248
4.75028	16.5774	5.48838
20.497	12.7663	6.40974
14.0895	15.3875	8.66903
13.232	12.8839	6.61288
17.2839	19.3368	6.40123
15.4104	11.4905	5.93609
5.27026	10.6422	5.14179
14.4904	13.5257	5.99422
18.6789	17.8318	7.39486
18.4581	10.0456	6.90771
10.9835	12.1801	5.37084
12.7911	14.0147	6.15889
16.8163	16.0086	7.65438
12.202	16.1501	7.06287
13.7254	10.5078	5.49687
19.7534	16.9497	6.36958
17.6207	13.5959	5.96497
6.25181	12.2086	5.15192
15.0712	18.9463	6.03752
4.34552	10.4084	8.21637
14.2737	14.1486	5.73965
11.0036	11.9638	8.27961
14.1933	12.0506	6.90841
16.5663	14.4484	7.37948
19.9234	12.5202	5.56188
14.7106	15.9799	5.53919
17.3204	16.6928	5.44562
16.7417	9.64898	7.91494
18.9765	15.9316	6.17288
16.1841	19.0639	5.66101
17.476	14.8437	6.57131
16.7734	11.346	5.77814
11.5631	6.44436	5.40075
17.1001	6.06971	7.73622
4.28369	12.4485	5.24205
16.5774	10.5317	5.73675
12.7663	14.109	5.71794
15.3875	15.6526	6.83293
12.8839	15.9345	5.35298
4.16727	16.2569	5.68258
18.064	11.2172	6.47772
19.3368	12.8428	6.5642
12.0535	12.5819	7.13195
11.4905	16.2585	5.2791
10.6422	13.9829	7.58331
13.5257	10.4516	7.54907
17.8318	16.6031	7.62116
10.0456	15.808	4.8251
12.1801	12.3919	5.33964
14.0147	12.9935	2.96422
15.8519	11.6786	7.59843
6.82878	15.9622	4.47931
16.0086	7.54468	4.87152
16.1501	13.9283	5.19506
10.5078	14.6563	6.85785
16.9497	17.7646	5.4415
13.5959	12.6188	5.36008
12.2086	13.7872	4.48535
18.9463	15.8867	5.36181
10.4084	12.1513	7.26659
14.1486	10.2298	6.49221
10.8983	16.2955	3.59851
11.9638	11.0243	5.15739
12.0506	15.0583	6.2623
14.4484	14.8771	4.97104
12.5202	10.5795	4.4725
15.9799	14.903	4.63903
11.1593	11.1261	6.98666
16.6928	16.8426	6.12629
9.64898	12.7601	6.3911
15.9316	13.4246	6.74441
19.0639	11.4028	4.30118
14.8437	11.1045	4.87185
11.346	17.1219	6.63876
6.44436	10.5699	4.5292
6.06971	16.441	5.98441
12.4485	12.0064	5.9081
6.27822	12.5028	6.45558
10.5317	13.2048	4.98662
14.109	8.62548	6.76403
4.37198	14.465	4.98087
15.6526	15.0164	4.25484
13.7981	14.5687	4.39173
15.9345	12.3485	4.35512
9.98713	13.128	6.41912
16.2569	13.0061	6.12671
11.2172	13.2822	6.33752
12.8428	11.8892	6.35245
12.5819	15.5616	4.10195
16.2585	13.1849	5.10149
13.9829	12.4986	4.0092
10.4516	13.4349	4.01014
16.6031	14.0833	6.24177
15.808	12.5446	3.90167
12.3919	13.0029	4.05682
12.9935	11.8257	3.58711
11.6786	11.5715	3.46856
15.9622	15.5577	4.16832
7.54468	15.5763	4.36247
13.9283	15.4059	3.78806
14.6563	9.02362	5.09362
17.7646	7.75903	5.67469
12.6188	11.733	5.13258
13.7872	14.885	5.52315
15.8867	10.8238	4.9449
12.1513	11.9912	5.39724
10.2298	17.3074	4.53879
16.2955	13.9381	5.50892
4.02977	14.7996	5.4395
11.0243	11.0397	5.28369
15.0583	13.5342	3.37519
14.8771	8.49239	5.15877
10.5795	10.5877	4.44074
14.903	12.4252	4.10388
11.1261	13.5493	2.74529
16.8426	14.2849	4.94234
12.7601	12.8405	3.64216
13.4246	13.354	3.40022
11.4028	12.3729	4.36273
11.1045	13.1976	4.44072
14.4614	11.8333
17.1219	13.5707
10.5699	10.5393
16.441	11.8731
12.0064	12.9505
9.45204	13.9745
15.031	12.5885
12.5028	11.6847
13.2048	9.6455
8.62548	10.4723
8.99357	14.3778
9.92156	12.87
14.465	15.254
15.0164	12.0089
14.5687	12.5176
12.3485	11.3241
13.128	12.152
13.0061	14.1912
13.2822	9.33366
11.8892	12.0186
15.5616	13.0276
13.1849	11.78
12.4986	13.3731
13.4349	6.17761
14.0833	12.5318
12.5446	10.0922
13.0029	8.45315
11.8257	11.9947
11.5715	14.0883
15.5577	7.71244
15.5763	11.3761
15.4059	16.1957
9.02362	11.403
7.75903	14.2128
11.733	15.1796
5.58205	12.4008
14.885	13.1579
10.8238	14.6301
11.9912	8.72904
17.3074	10.0943
13.9381	11.461
14.7996	15.582
11.0397	14.3732
13.5342	8.99325
8.49239	12.9081
10.5877	12.2426
12.4252	13.2649
3.73629	15.5529
13.5493	11.1909
14.2849	14.1475
12.8405	12.392
13.354	11.6191
12.3729	8.65
13.1976	13.7003
11.8333	14.4867
12.6783	13.9363
8.92092	10.9116
13.5707	14.3989
10.5393	13.8464
11.8731	10.8531
12.9505	11.92
13.9745	12.7213
12.5885	7.65435
11.6847	10.1671
9.6455	12.6687
10.4723	13.1717
14.3778	13.0019
12.87	14.4655
15.254	10.0511
12.0089	12.7254
12.5176	12.0298
11.3241	8.68136
12.152	14.7696
14.1912	10.9975
9.33366	15.1301
12.0186	7.75462
13.0276	11.0516
11.78	14.8565
13.3731	12.8206
6.17761	14.864
12.5318	10.4867
10.0922	9.4414
8.45315	13.2578
11.9947	5.62315
14.0883	13.8309
7.71244	11.9666
11.3761	14.1253
16.1957	11.6368
11.403	12.6212
14.2128	12.7862
15.1796	11.2115
12.4008	10.7279
13.1579	12.3517
14.6301	9.48207
8.72904	13.9094
10.0943	13.8735
11.461	10.2452
15.582	11.2756
14.3732	11.5961
8.99325	13.9548
12.9081	11.9047
12.2426	13.014
13.2649	10.7667
15.5529	12.3056
11.1909	10.2421
14.1475	11.0606
12.392	8.35031
11.6191	11.7958
8.65	5.3341
13.7003	14.144
8.78081	9.66528
14.4867	12.9999
13.9363	11.969
10.9116	13.8785
14.3989	13.3631
13.8464	12.3381
10.8531	13.9761
11.92	5.74851
12.7213	8.97931
7.65435	12.8358
10.1671	11.9195
12.6687	14.1279
13.1717	10.3837
13.0019	12.0742
14.4655	13.2715
10.0511	13.1164
12.7254	11.0722
12.0298	10.3327
7.53379	13.1165
8.68136	14.3065
14.7696	12.9361
10.9975	13.8341
15.1301	13.6246
7.75462	9.19947
8.04948	13.1519
11.0516	9.60451
14.8565	11.3234
12.8206	12.6894
14.864	8.94572
10.4867	11.9508
9.4414	13.7385
13.2578	10.6457
5.62315	11.3195
13.8309	11.1038
11.9666	11.3527
14.1253	12.8374
11.6368	10.4756
12.6212	13.0522
12.7862	10.0461
11.2115	11.7627
10.7279	12.6593
12.3517	11.5278
9.48207	11.3283
13.9094	11.4858
13.8735	10.8404
10.2452	11.9966
11.2756	10.2794
11.5961	11.0945
13.9548	7.91324
11.9047	11.4929
13.014	5.36757
10.7667	12.626
12.3056	13.0233
10.2421	13.5444
11.0606	10.4856
8.35031	13.4292
11.7958	10.1671
5.3341	12.2504
14.144	10.9141
9.66528	13.1517
12.9999	11.7247
11.969	12.1627
13.8785	9.74609
13.3631	10.662
14.0183	10.0972
7.08735	9.01148
12.3381	13.1524
13.9761	9.752
5.74851	12.8238
8.97931	12.7512
12.8358	11.8538
11.9195	8.84646
14.1279	12.3373
10.3837	12.2392
12.0742	10.3462
13.2715	9.08613
13.1164	8.90193
11.0722	11.5306
10.3327	9.87782
13.1165	11.1758
14.3065	12.678
12.9361	9.39875
14.1307	11.9008
13.8341	11.5351
13.6246	10.3642
9.19947	12.0714
13.1519	10.5526
9.60451	10.6675
11.3234	10.1553
12.6894	11.8723
8.94572	10.673
11.9508	11.9869
13.7385	10.4718
10.6457	3.04815
11.3195	7.12074
11.1038	9.04526
11.3527	9.1166
12.8374	12.7107
10.4756	10.2948
13.0522	11.7147
10.0461	10.816
13.4051	11.2234
11.7627	9.33914
12.6593	10.6935
11.5278	10.876
11.3283	12.7164
11.4858	11.851
10.8404	11.6175
11.9966	13.1984
10.2794	9.56706
11.0945	10.8148
7.91324	12.3661
11.4929	10.1787
5.36757	9.54247
12.626	11.179
13.0233	11.3973
13.5444	11.8824
10.4856	9.50256
13.4292	9.51935
10.1671	12.1124
12.2504	12.2196
10.9141	10.0396
13.1517	12.4314
11.7247	12.2513
12.1627	10.0985
9.74609	10.0005
10.662	11.1306
10.0972	11.048
9.01148	10.8553
13.1524	10.6308
9.752	10.5643
11.1992	8.60743
12.8238	12.7917
12.7512	11.4842
11.8538	10.5955
8.84646	11.0274
12.3373	10.9994
12.2392	9.83718
10.3462	11.0257
9.08613	12.0341
8.90193	11.1525
5.29159	10.1994
11.5306	12.0406
9.87782	9.41311
11.1758	12.0255
12.678	11.5408
9.39875	9.12948
11.9008	8.14079
11.5351	11.8417
10.3642	11.5803
12.0714	11.878
10.5526	10.4345
10.6675	10.9486
10.1553	8.57391
11.8723	8.14243
10.673	11.1167
11.9869	10.2775
10.4718	11.3815
3.04815	9.68885
7.12074	10.0068
9.04526	11.4108
9.1166	10.1002
12.7107	9.50331
12.7166	7.14106
10.2948	11.4909
11.7147	11.242
10.816	7.86207
11.2234	9.38945
9.33914	10.0862
10.6935	10.0633
10.876	11.5811
12.7164	10.5402
11.851	9.26133
11.6175	11.9334
13.1984	10.3707
9.56706	11.3816
10.8148	11.5597
12.3661	10.1441
10.1787	10.222
9.54247	11.5769
11.179	10.8319
11.3973	8.23347
11.8824	10.3464
5.27015	11.7804
9.50256	11.1957
9.51935	10.9968
12.1124	10.2699
12.2196	9.5374
10.0396	11.0711
12.4314	10.539
12.2513	10.6866
4.28345	9.28885
10.0985	11.3622
10.0005	8.90496
11.1306	9.85121
11.048	11.2465
10.8553	9.04691
10.6308	10.3451
10.5643	9.12241
8.60743	8.16305
12.7917	8.96992
11.4842	11.311
8.17398	9.08824
10.5955	11.6796
11.0274	10.2158
10.9994	2.27983
9.83718	9.80804
11.0257	10.4651
12.0341	11.1624
7.64507	9.50283
11.1525	8.33632
10.1994	10.7197
12.0406	11.1936
9.41311	10.0422
12.0255	7.74578
11.5408	10.5949
9.12948	6.99481
8.14079	8.87913
11.8417	9.68261
11.5803	8.99093
11.878	8.87072
5.08683	9.86622
10.4345	10.5873
10.9486	10.3213
8.57391	10.9638
8.14243	10.2361
11.1167	10.9653
6.77864	8.98466
10.2775	10.9016
11.3815	10.5443
9.68885	9.30724
10.0068	9.56404
11.4108	11.2566
10.1002	10.8796
8.04407	11.0035
9.50331	9.21751
7.14106	9.03077
11.4909	9.84123
11.242	10.2169
7.86207	10.1924
9.38945	10.2975
10.0862	7.61092
10.0633	10.3355
11.5811	10.5465
10.5402	9.2393
9.26133	9.40017
11.9334	10.6547
10.3707	10.2179
11.3816	10.4846
11.5597	6.54445
10.1441	9.25874
10.222	8.0898
11.5769	10.2087
10.8319	8.4482
8.23347	10.7721
10.3464	10.223
11.7804	11.0444
11.1957	10.4166
10.9968	10.263
10.2699	10.1574
9.5374	10.3335
11.0711	11.0078
10.539	10.3093
9.4413	10.8096
10.6866	10.5925
9.28885	9.69903
11.3622	10.7757
8.90496	9.92774
9.85121	7.55981
11.2465	8.6949
9.04691	8.24222
7.98608	9.24414
10.3451	10.6238
9.12241	9.07345
8.16305	10.0295
8.96992	8.50486
11.311	9.75398
9.08824	6.97296
11.6796	8.30927
10.2158	10.0415
2.27983	7.018
9.80804	9.37433
7.83732	10.4652
10.4651	10.3781
8.87513	10.7202
10.6197	9.81373
11.1624	9.91945
9.50283	10.2388
8.33632	8.78618
10.7197	10.4777
11.1936	6.96807
10.0422	10.4431
7.74578	9.01008
10.5949	9.97389
6.99481	8.61193
8.87913	7.19029
9.68261	10.3429
8.99093	8.08375
8.87072	9.60307
9.86622	7.90897
10.5873	8.50554
10.3213	9.75265
10.9638	7.23776
10.2361	9.62294
10.9653	9.03397
8.98466	9.77153
10.9016	8.73691
10.5443	8.66462
9.30724	9.9402
9.56404	9.5564
10.5406	8.93701
11.2566	7.53334
10.8796	9.18291
11.0035	7.34744
9.21751	8.44673
9.03077	8.96948
10.4038	9.10501
9.84123	7.79626
10.2169	10.0427
10.508	10.0205
10.1924	7.62987
10.2975	8.37393
7.61092	8.92489
10.3355	9.38517
10.5465	7.40991
9.2393	8.50512
9.40017	7.80347
10.6547	8.73751
10.2179	8.01257
10.4846	8.43675
6.54445	9.10924
9.25874	9.37545
8.0898	5.60045
10.2087	9.22987
8.4482	8.38437
10.7721	8.61493
10.223	8.9527
6.59149	9.20936
11.0444	8.47543
10.4166	9.30736
10.263	8.98794
10.1574	8.77153
10.3335	7.20264
11.0078	7.47614
10.3093	6.60577
10.8096	7.26158
10.5925	8.80028
9.69903	9.99006
10.7757	8.47513
9.92774	9.07032
7.55981	9.53066
8.6949	8.74363
8.22936	9.49771
8.24222	9.73972
9.24414	8.91084
10.6238	9.94612
9.07345	7.85754
10.0295	7.48686
10.738	7.09721
8.50486	9.79599
9.75398	9.75615
4.91916	8.42118
7.2035	9.07709
6.97296	8.63222
8.30927	8.02671
9.3757	9.19731
6.66286	8.30739
10.0415	7.45002
7.018	7.95424
9.37433	7.49383
10.4652	8.79391
10.3781	7.03384
10.7202	7.72078
9.81373	7.74388
9.91945	9.45134
7.78274	8.66381
10.2388	8.58666
8.78618	9.6786
10.4777	8.54739
10.5024	7.16391
6.96807	7.65257
10.4431	9.01787
9.01008	8.32731
7.98153	8.4316
9.97389	7.33081
8.61193	9.17514
7.19029	7.75984
10.3429	9.33919
8.08375	9.23477
8.00548	8.03962
9.60307	9.73251
7.90897	6.58297
8.50554	8.94982
9.75265	8.73506
7.23776	8.44208
9.62294	8.51245
9.03397	7.33501
9.77153	9.27076
8.73691	8.45078
6.33758	4.96619
8.66462	9.52086
8.83205	7.08325
6.49835	8.97739
9.9402	8.62989
9.67251	7.30544
6.40364	7.8801
9.5564	8.54001
8.93701	7.5824
7.53334	9.34
9.18291	8.45419
7.34744	7.94985
8.44673	8.19998
8.96948	8.35995
6.69936	7.65299
9.10501	7.80485
7.79626	8.51792
8.63868	8.2612
10.0427	7.88357
10.0205	8.2468
10.0284	5.7642
7.62987	7.68168
8.37393	9.3537
8.92489	9.42823
9.44632	7.19498
9.38517	8.53804
7.40991	5.87357
8.50512	8.30656
9.4054	9.11377
5.89414	9.27877
7.80347	8.21772
8.73751	8.72282
8.01257	7.40307
8.43675	7.82328
9.10924	9.08518
9.37545	8.94633
5.60045	8.21864
9.22987	8.73817
8.38437	8.96968
8.61493	8.57707
8.9527	8.9797
9.20936	6.85277
8.47543	8.55544
8.58004	8.3284
9.30736	6.91836
8.98794	8.19616
4.92587	8.02202
8.77153	8.44479
7.20264	8.75771
9.71213	8.47732
7.47614	9.17493
6.60577	8.70701
7.26158	8.22181
8.80028	7.87285
9.99006	7.93549
8.47513	7.00594
9.07032	8.77142
9.53066	8.34085
6.61776	7.60954
8.74363	7.95587
9.49771	8.02404
9.73972	7.5104
8.91084	8.56811
9.94612	6.3451
7.85754	7.66993
7.48686	8.17667
7.09721	7.33506
9.79599	7.95319
9.75615	7.87257
8.42118	7.77906
6.85579	7.54689
9.07709	6.67106
8.63222	8.92958
8.02671	6.53126
9.19731	7.31087
8.30739	7.33829
7.45002	8.67005
7.95424	8.19828
7.49383	7.85392
8.79391	8.53454
7.03384	8.22934
7.72078	8.59511
6.34025	7.63004
7.74388	8.63766
9.45134	7.12001
8.66381	8.37683
8.58666	7.95137
9.6786	8.3508
8.54739	8.37897
7.16391	8.25798
8.1919	7.77109
7.65257	5.38169
9.01787	7.90445
7.05446	8.18615
8.32731	8.47282
8.4316	8.58929
6.73693	7.41565
7.33081	7.80133
9.17514	7.68991
6.36022	5.48265
7.75984	6.69334
9.33919	7.03999
9.23477	6.02283
4.47235	8.21059
8.03962	8.46529
9.73251	6.95855
6.58297	7.53685
8.94982	6.36189
8.73506	6.70736
6.03718	7.73215
8.44208	8.17774
8.51245	7.92028
7.33501	8.61458
9.27076	6.29055
8.45078	6.65535
8.7496	7.29953
4.96619	8.33497
9.52086	7.34515
7.08325	5.87401
8.97739	7.36637
8.62989	7.22591
7.30544	8.32256
7.8801	7.11827
8.54001	6.87069
7.5824	7.33364
9.34	7.91529
8.45419	8.53062
4.55846	8.03705
7.94985	7.29526
8.19998	6.71333
8.35995	7.69979
7.65299	7.82582
8.9418	7.95734
7.80485	8.07476
8.51792	6.91719
3.42904	7.5525
8.2612	7.72173
7.88357	7.33967
8.2468	7.07241
5.7642	7.01117
7.68168	8.14466
9.3537	8.05029
9.42823	7.44455
8.88363	7.97388
7.19498	8.14901
8.53804	8.40373
5.87357	8.1438
8.30656	7.86937
9.11377	6.84109
9.27877	7.91155
8.21772	6.65723
8.72282	7.71182
7.40307	7.5157
7.82328	8.05001
9.08518	8.10626
8.94633	6.517
8.21864	7.40986
8.98724	6.97341
8.73817	6.80031
8.96968	7.05872
8.57707	6.49878
8.9797	6.99422
6.85277	7.32323
8.55544	6.35186
8.3284	7.03419
6.91836	8.25007
8.19616	5.55182
8.02202	6.76057
8.44479	7.42279
8.75771	7.63149
5.87456	6.04625
8.47732	7.899
5.93874	6.88524
6.89235	6.25339
9.17493	8.0671
8.70701	7.04878
8.22181	6.29723
7.87285	7.84365
6.3265	7.61579
5.79025	7.64915
7.93549	6.8569
7.00594	6.62893
8.77142	7.56726
6.92504	7.20507
8.34085	6.96086
7.13555	7.48674
8.00097	7.27573
7.60954	7.83468
7.95587	6.98399
8.02404	7.07884
5.94332	5.70955
7.5104	7.87756
7.92725	7.29699
8.56811	6.65353
6.3451	7.13688
7.66993	6.72858
8.17667	7.60256
7.33506	7.66422
7.95319	6.91668
7.87257	3.69624
8.35783	6.42645
7.77906	5.97411
7.54689	7.05911
6.67106	7.47625
7.61272	7.03184
8.92958	6.90346
6.53126	7.30172
7.31087	7.48724
7.33829	6.46909
8.67005	5.07873
8.19828	7.10865
7.85392	6.56785
8.53454	7.58425
8.22934	6.86939
8.59511	6.99477
7.63004	6.99018
8.63766	6.0692
5.86248	7.01801
7.12001	5.7626
8.37683	7.4942
7.95137	7.17656
8.3508	6.27665
8.37897	7.31144
5.48838	6.76595
8.25798	6.87871
7.77109	6.96633
5.38169	6.37427
7.90445	6.50076
8.18615	5.96489
8.47282	7.18751
8.58929	5.25882
7.41565	6.66625
7.80133	6.5011
7.68991	6.22537
5.48265	6.09938
6.40974	6.94341
6.69334	6.83594
8.66903	7.22983
7.03999	7.3694
6.02283	6.57697
6.61288	6.76867
8.21059	5.35589
8.46529	7.08544
6.40123	6.8179
6.95855	8.10809
7.53685	5.70874
6.36189	6.62669
5.93609	6.73671
6.70736	6.30275
7.73215	6.05598
8.17774	6.71989
7.92028	6.9574
5.14179	7.09552
8.61458	6.51782
6.29055	6.67633
5.99422	6.75859
6.65535	6.84749
7.29953	6.32162
8.33497	6.44331
7.34515	6.60915
7.39486	6.80588
5.87401	6.90244
7.36637	7.0024
7.22591	6.93986
6.90771	6.69116
8.32256	6.99297
5.37084	5.138
6.15889	5.80824
7.11827	6.34781
6.87069	6.6137
7.65438	5.86958
7.33364	5.56194
7.06287	6.6954
5.49687	6.95995
7.91529	6.00667
8.53062	5.96132
8.03705	6.43084
6.36958	6.55471
7.29526	6.79021
6.71333	5.06034
7.69979	5.98565
7.82582	6.38626
7.95734	5.81722
8.07476	6.05598
6.91719	5.5059
5.96497	6.6309
7.5525	6.57467
5.15192	6.41526
7.72173	6.32104
7.33967	6.42916
7.07241	6.31991
7.01117	5.74547
8.14466	5.40218
8.05029	6.60291
7.44455	6.04022
7.97388	5.89409
8.14901	6.10958
8.40373	5.11972
6.03752	6.59971
8.1438	6.51432
7.86937	6.5841
8.21637	5.79699
6.84109	6.01852
5.73965	6.5089
8.27961	5.77193
7.91155	5.9883
6.65723	5.92234
7.71182	5.59497
7.5157	5.9125
6.90841	6.37359
7.37948	5.29423
5.56188	5.78375
8.05001	5.27321
5.53919	6.23689
5.44562	5.9849
7.91494	6.04225
6.17288	5.40695
8.10626	5.91415
6.517	5.55893
5.66101	6.13506
7.40986	5.47439
6.57131	6.28502
6.97341	4.59713
6.80031	6.22835
7.05872	4.73674
5.77814	5.84707
6.49878	5.66421
5.40075	5.84744
6.99422	5.18866
7.32323	5.00141
6.35186	5.59561
7.03419	5.26362
7.73622	5.97487
8.25007	5.86751
5.55182	5.56151
5.24205	5.99662
6.76057	5.97404
5.73675	5.69221
7.42279	5.30651
7.63149	5.92955
5.71794	5.0787
6.04625	5.87823
7.899	5.28759
6.83293	4.80777
5.35298	3.89058
6.88524	4.37514
6.25339	4.84847
8.0671	5.78463
5.68258	4.66385
7.04878	5.51813
6.29723	4.96426
7.84365	5.64907
7.61579	5.08562
7.64915	4.30975
6.47772	5.18764
6.8569	5.17299
6.62893	4.14905
6.5642	4.53951
7.13195	4.21116
5.2791	4.42221
7.58331
7.54907
7.56726
7.20507
6.96086
7.48674
7.27573
7.83468
6.98399
7.07884
5.70955
7.87756
7.29699
7.62116
6.65353
7.13688
6.72858
7.60256
7.66422
6.91668
3.69624
6.42645
5.97411
7.05911
7.47625
7.03184
6.90346
7.30172
7.48724
4.8251
6.46909
5.07873
5.33964
2.96422
7.10865
7.59843
6.56785
4.47931
7.58425
6.86939
6.99477
6.99018
6.0692
7.01801
5.7626
7.4942
7.17656
6.27665
4.87152
7.31144
5.19506
6.76595
6.87871
6.96633
6.85785
5.4415
6.37427
6.50076
5.96489
5.36008
7.18751
5.25882
6.66625
4.48535
6.5011
6.22537
6.09938
5.36181
6.94341
6.83594
7.22983
7.26659
7.3694
6.49221
6.57697
6.76867
5.35589
7.08544
3.59851
6.8179
8.10809
5.70874
5.15739
6.2623
6.62669
6.73671
6.30275
6.05598
6.71989
4.97104
6.9574
7.09552
6.51782
4.4725
4.63903
6.67633
6.75859
6.84749
6.32162
6.44331
6.60915
6.80588
6.98666
6.12629
6.90244
7.0024
6.3911
6.93986
6.69116
6.99297
5.138
5.80824
6.34781
6.6137
5.86958
6.74441
4.30118
5.56194
6.6954
6.95995
6.00667
4.87185
6.63876
4.5292
5.96132
6.43084
6.55471
6.79021
5.98441
5.9081
5.06034
5.98565
6.38626
5.81722
6.05598
5.5059
6.6309
6.57467
6.41526
6.32104
6.42916
6.45558
4.98662
6.31991
5.74547
6.76403
5.40218
4.98087
6.60291
6.04022
5.89409
4.25484
6.10958
5.11972
6.59971
6.51432
6.5841
5.79699
6.01852
6.5089
5.77193
4.39173
5.9883
5.92234
5.59497
4.35512
5.9125
6.37359
6.41912
5.29423
5.78375
5.27321
6.12671
6.33752
6.23689
6.35245
5.9849
6.04225
4.10195
5.40695
5.91415
5.10149
5.55893
6.13506
5.47439
4.0092
6.28502
4.01014
6.24177
4.59713
6.22835
4.73674
5.84707
5.66421
5.84744
5.18866
3.90167
5.00141
4.05682
5.59561
3.58711
5.26362
3.46856
5.97487
4.16832
5.86751
5.56151
4.36247
5.99662
5.97404
5.69221
5.30651
5.92955
5.0787
5.87823
5.28759
3.78806
4.80777
5.09362
3.89058
4.37514
5.67469
5.13258
4.84847
5.78463
5.52315
4.9449
4.66385
5.51813
4.96426
5.39724
4.53879
5.50892
5.4395
5.28369
5.64907
3.37519
5.08562
4.30975
5.18764
5.15877
5.17299
4.44074
4.10388
2.74529
4.94234
3.64216
3.40022
4.36273
4.44072
4.14905
4.53951
4.21116
4.42221

## Sheet: Wilcoxon text results
variable	Mann-Whitney U Test (w/ continuity correction) By variable Class Marked tests are significant at p <0.001
	Rank Sum	Rank Sum	U	Z	p-value	Z	p-value	Valid N	Valid N
P Int vs Nint	807829	140924	108539	5.95495	2.60424e-09	5.95495	2.60424e-09	1123	254
FE Int vs Nint	849571	99182	66797	13.2484	2.60424e-09	13.2484	2.60424e-09	1123	254
