# Supplementary material for: Atrophin controls developmental signaling pathways via interactions with Trithorax-like
Source: eLife journal article supplement (doi:10.7554/elife.23084), 2017-03-22
Supplement: supp [file elife-23084-supp-v1.zip › elife_poa_e23084_Figure_6_Source_Data_1.xlsx]

## Sheet: Sheet1
	qPCR1	qPCR2	qPCR3	Average	%Input	Error_positive	Error_negative
Figure 6B
Sbb
10IgG10Trl	30.88	30.46	30	30.4467	0.002103	0.000755695	0.000555927
10IgG5Atro	31.94	30.89	31.67	31.5	0.00101334	0.000467686	0.000319998
5Atro10IgG	30.06	30.61	30.44	30.37	0.00221778	0.000486055	0.000398679
5Atro10Trl	27.17	27.27	27.26	27.2333	0.0195052	0.00102568	0.00097444
5Atro5Atro	28.13	28.1	28.28	28.17	0.0101903	0.00079456	0.000737088
1%Input	21.53	21.61	21.52	21.5533	1	0.0495432	0.0472045
Sbb Atro No Trl
10IgG10Trl	33.47	33.34	32.86	33.2233	0.000451391	0.000114297	9.12031e-05
10IgG5Atro	30.85	30.64	31.27	30.92	0.00222805	0.000563173	0.000449544
5Atro10IgG	28.2	28.49	28.61	28.4333	0.0124878	0.00203029	0.00174637
5Atro10Trl	28.56	28.37	28.44	28.4567	0.0122875	0.000970727	0.000899653
5Atro5Atro	25.74	25.63	25.83	25.7333	0.0811462	0.00662866	0.00612807
1%Input	22.05	22.15	22.13	22.11	1	0.0532392	0.0505481
Sbb Neg
10IgG10Trl	33.81	N/A	31.96	32.885	0.000367068	0.000542945	0.000219005
10IgG5Atro	32	34.54	32.8	33.1133	0.000313336	0.000458387	0.000186115
5Atro10IgG	32.69	33.15	34.61	33.4833	0.000242454	0.000244027	0.000121619
5Atro10Trl	31.11	31.4	31.36	31.29	0.00110889	0.000139269	0.000123729
5Atro5Atro	33.11	31.75	32.46	32.44	0.000499694	0.000302815	0.000188552
1%Input	21.49	21.53	21.4	21.4733	1	0.0674459	0.0631844
Figure 6 - Figure supplement 1
Trl 3R
10IgG10Trl	31.25	33.28	31.62	32.05	0.00150085	0.00167649	0.000791908
10IgG5Atro	33.67	32.54	33.36	33.19	0.000681027	0.000340888	0.000227175
5Atro10IgG	30.56	31.12	30.76	30.8133	0.00353682	0.00077879	0.00063825
5Atro10Trl	26.89	26.97	26.91	26.9233	0.0524347	0.00223718	0.00214564
5Atro5Atro	27.81	28.31	28.36	28.16	0.0222508	0.00528107	0.00426808
1%Input	22.64	22.65	22.72	22.67	1	0.0436545	0.0418285
Trl Neg
10IgG10Trl	34.53	39.48	34.91	36.3067	0.00744248	0.0442404	0.00637075
10IgG5Atro	38.76	37.65	36.86	37.7567	0.00272411	0.00298417	0.00142411
5Atro10IgG	37.08	35.39	38.01	36.8267	0.00519018	0.00861618	0.00323905
5Atro10Trl	37.2	35.18	38.85	37.0767	0.0043644	0.0119142	0.00319428
5Atro5Atro	37.32	38.41	37.78	37.8367	0.00257716	0.00168638	0.00101936
1%Input	28.79	29.18	29.74	29.2367	1	0.596959	0.37381
Noc
10IgG10Trl	29.68	29.09	28.74	29.17	0.00797666	0.00311813	0.00224179
10IgG5Atro	29.48	29.92	30.15	29.85	0.00497875	0.00133083	0.00105013
5Atro10IgG	27.99	28.48	28	28.1567	0.0161014	0.00347138	0.0028557
5Atro10Trl	24.08	24.17	24.06	24.1033	0.267325	0.0124802	0.0119236
5Atro5Atro	25.2	25.27	25.3	25.2567	0.120185	0.0050553	0.00485125
1%Input	22.17	22.2	22.23	22.2	1	0.0298444	0.0289795
Noc Neg
10IgG10Trl	32.23	33.37	32.67	32.7567	0.000411544	0.000203407	0.000136126
10IgG5Atro	32.63	35.11	32.81	33.5167	0.000243015	0.000391531	0.000149946
5Atro10IgG	32.4	32.18	32.98	32.52	0.000484908	0.00016365	0.000122356
5Atro10Trl	32.63	32.96	30.89	32.16	0.000622344	0.000725151	0.000334913
5Atro5Atro	32.81	32.75	32.58	32.7133	0.000424093	4.3024e-05	3.90613e-05
1%Input	21.59	21.45	21.49	21.51	1	0.0732457	0.0682469
