# Supplementary material for: Atrophin controls developmental signaling pathways via interactions with Trithorax-like
Source: eLife journal article supplement (doi:10.7554/elife.23084), 2017-03-22
Supplement: supp [file elife-23084-supp-v1.zip › elife_poa_e23084_Supplementary_File_1.xlsx]

## Sheet: Final_results_for_paper.txt
Chromosome	Peak_Start	Peak_End	Peak_Summit	Average_-log(pvalue)	FBGN	Gene_Name
chr2R	18024256	18024656	18024398	82.7443	FBgn0000008	a
chr3R	12774315	12774605	12774458	36.9723	FBgn0000015	Abd-B
chrX	5793933	5794124	5794010	22.8203	FBgn0000042	Act5C
chr3R	16890670	16891225	16890925	58.2954	FBgn0000083	AnnIX
chrX	20067528	20067675	20067585	19.2472	FBgn0000084	AnnX
chr2L	2161179	2161971	2161672	64.5907	FBgn0000097	aop
chr2R	1614279	1614761	1614503	84.1857	FBgn0000099	ap
chr3R	20476769	20477254	20476989	47.54	FBgn0000139	ash2
chrX	4320759	4321231	4320956	36.7311	FBgn0000179	bi
chrX	1517301	1517589	1517448	16.6503	FBgn0000210	br
chrX	9587768	9588207	9587924	35.9226	FBgn0000233	btd
chr3R	5358515	5359815	5358753	74.0097	FBgn0000244	by
chr2L	16325464	16326055	16325931	15.0289	FBgn0000250	cact
chr2L	20770465	20770669	20770550	19.8903	FBgn0000251	cad
chr2R	8148744	8149247	8148957	21.0218	FBgn0000253	Cam
chr2L	3896078	3896302	3896168	30.7408	FBgn0000256	capu
chr2L	5979776	5981158	5980206	75.121	FBgn0000308	chic
chr2L	15056999	15057285	15057127	23.5282	FBgn0000317	ck
chr2R	3269268	3269612	3269470	39.9602	FBgn0000352	cos
chr3R	5061500	5062286	5062072	34.8662	FBgn0000412	D1
chr3R	2617158	2617556	2617317	27.6864	FBgn0000439	Dfd
chr2R	6115443	6115924	6115635	40.8208	FBgn0000448	Hr46
chrX	16110763	16111870	16110977	40.0581	FBgn0000459	disco
chr3R	15147638	15148014	15147819	35.1092	FBgn0000463	Dl
chr3R	25381745	25382064	25381907	35.0336	FBgn0000492	Dr
chr3R	3793454	3793961	3793682	57.9119	FBgn0000504	dsx
chrX	3705497	3705882	3705664	20.3392	FBgn0000542	ec
chr2R	2019351	2019783	2019528	41.9524	FBgn0000546	EcR
chr3L	15507493	15507892	15507648	40.7216	FBgn0000565	Eip71CD
chr3L	17556721	17557242	17556896	93.0097	FBgn0000567	Eip74EF
chr3L	17964099	17964589	17964365	43.1701	FBgn0000568	Eip75B
chr3L	749082	749656	749319	88.6474	FBgn0000575	emc
chr3R	9727303	9727466	9727389	16.2054	FBgn0000576	ems
chr2R	7415518	7416029	7415842	36.7094	FBgn0000577	en
chr2R	15041775	15042017	15041876	21.4434	FBgn0000578	ena
chr2R	9510276	9510720	9510423	37.3837	FBgn0000633	fas
chrX	4058615	4058846	4058722	11.3941	FBgn0000635	Fas2
chr2L	3632108	3632549	3632250	65.1349	FBgn0000721	for
chr2L	4197351	4197570	4197444	37.3711	FBgn0001075	ft
chr3L	18752063	18752762	18752488	54.2888	FBgn0001078	ftz-f1
chr3L	14267127	14267523	14267295	90.0375	FBgn0001085	fz
chr3R	19768716	19769055	19768881	42.0473	FBgn0001098	Gdh
chr3L	15503991	15504231	15504069	35.515	FBgn0001099	gdl
chr2L	5943733	5944032	5943852	46.4682	FBgn0001128	Gpdh
chr2L	8433561	8433819	8433666	18.0937	FBgn0001137	grk
chr2L	131740	132191	131966	39.0321	FBgn0001142	Gs1
chr3R	8194898	8195251	8195059	44.362	FBgn0001149	GstD1
chr3L	9370352	9370913	9370478	23.0232	FBgn0001225	Hsp26
chr3L	9370352	9370913	9370478	23.0232	FBgn0001227	Hsp67Ba
chr3R	19882950	19883353	19883110	27.8928	FBgn0001230	Hsp68
chr3L	3192913	3193385	3193149	46.5419	FBgn0001233	Hsp83
chr3R	17121714	17122452	17122245	18.8289	FBgn0001234	Hsromega
chr3R	6440055	6440445	6440216	42.9977	FBgn0001235	hth
chr3R	3853159	3853455	3853297	20.919	FBgn0001255	ImpE3
chr3L	4233691	4234050	4233842	42.6526	FBgn0001257	ImpL2
chr3L	6256865	6257195	6256970	20.6764	FBgn0001258	ImpL3
chr2R	7362938	7363262	7363101	47.7351	FBgn0001269	inv
chr3R	25597449	25597984	25597844	107.094	FBgn0001297	kay
chr3L	530860	531373	531156	39.671	FBgn0001316	klar
chr2R	10686599	10686827	10686700	43.5236	FBgn0001319	kn
chr3L	20614769	20615247	20614923	35.5569	FBgn0001323	knrl
chrX	11283877	11284377	11284014	31.8224	FBgn0001624	dlg1
chr2L	5979776	5981158	5980206	75.121	FBgn0001942	eIF-4a
chr2L	14021587	14022043	14021883	20.5621	FBgn0001967	nimC3
chr2L	16284504	16285108	16284830	72.8483	FBgn0001994	crp
chr2L	16325464	16326055	16325931	15.0289	FBgn0001995	mRpL4
chr3L	12508636	12509160	12508945	18.0572	FBgn0002466	sti
chr3L	6210880	6211379	6211097	18.5844	FBgn0002526	LanA
chr3L	9607816	9608041	9607994	15.4936	FBgn0002528	LanB2
chr2L	1420378	1420539	1420435	11.2486	FBgn0002543	lea
chr3R	21847316	21847664	21847442	52.8556	FBgn0002609	HLHm3
chr3R	21847316	21847664	21847442	52.8556	FBgn0002629	m4
chr2R	9894196	9895024	9894364	53.5838	FBgn0002643	mam
chr2R	15344227	15344819	15344595	14.9727	FBgn0002716	mei-W68
chr3R	8545264	8545808	8545635	43.2468	FBgn0002719	Men
chr3R	21830385	21830718	21830579	12.3472	FBgn0002733	HLHmbeta
chr3R	11799409	11799800	11799488	40.0322	FBgn0002783	mor
chr2R	20287096	20287499	20287260	16.1222	FBgn0002787	Mov34
chr3R	16782587	16782953	16782755	74.1633	FBgn0002921	Atpalpha
chr3R	4859819	4859998	4859872	30.1535	FBgn0002932	neur
chr3R	15715593	15716706	15715831	76.8765	FBgn0002940	ninaE
chr3L	19038499	19038664	19038561	20.101	FBgn0002945	nkd
chr2L	9449687	9449908	9449779	40.1564	FBgn0002973	numb
chr3R	678064	678494	678257	25.7501	FBgn0003002	opa
chrX	4511335	4511608	4511468	28.4523	FBgn0003053	peb
chrX	2211425	2211934	2211686	95.2268	FBgn0003079	phl
chr3R	11851484	11851996	11851615	54.8952	FBgn0003117	pnr
chr3R	19158978	19161318	19160332	90.5055	FBgn0003118	pnt
chr3R	4159584	4159831	4159700	35.985	FBgn0003129	Poxm
chr3L	1366919	1367102	1366993	17.2775	FBgn0003138	Ptp61F
chr2R	17066375	17066756	17066476	14.4586	FBgn0003162	Pu
chr3R	5052364	5053287	5052692	113.657	FBgn0003165	pum
chr2L	8708886	8709705	8709084	52.9691	FBgn0003209	raw
chr2R	15156343	15156600	15156439	17.3342	FBgn0003254	rib
chr2R	12471364	12471638	12471488	21.4596	FBgn0003274	RpLP2
chr3R	23751226	23751382	23751273	23.1117	FBgn0003279	RpL4
chr3L	1368361	1368667	1368504	14.4418	FBgn0003295	ru
chrX	15705670	15706139	15705834	41.0664	FBgn0003345	sd
chrX	10678424	10678801	10678604	46.7665	FBgn0003360	sesB
chrX	2536562	2536750	2536660	22.0447	FBgn0003371	sgg
chr2R	7089685	7091633	7089985	83.4271	FBgn0003396	shn
chr3L	21019355	21019692	21019493	56.6211	FBgn0003415	skd
chr2R	15519259	15519606	15519502	22.1108	FBgn0003435	sm
chr2L	20310314	20310580	20310385	19.1128	FBgn0003475	spir
chr3R	22895781	22896102	22895892	57.2428	FBgn0003495	spz
chr3R	13947267	13947833	13947460	23.7851	FBgn0003499	sr
chr2L	8277592	8278153	8277750	23.0483	FBgn0003502	Btk29A
chr3R	11818862	11819239	11819046	56.3084	FBgn0003507	srp
chr3R	12229327	12229756	12229599	24.9356	FBgn0003513	ss
chr3R	25080870	25081510	25081067	21.2946	FBgn0003525	stg
chr3R	8106495	8106874	8106637	30.1118	FBgn0003651	svp
chr2L	5237288	5237721	5237416	63.1598	FBgn0003716	tkv
chr3R	11112207	11112844	11112529	114.819	FBgn0003721	Tm1
chr2R	16963318	16963768	16963560	68.739	FBgn0003748	Treh
chr3R	10111973	10112774	10112218	68.0239	FBgn0003862	trx
chr3R	27538765	27539948	27539248	139.149	FBgn0003870	ttk
chr2R	4536757	4537346	4537014	123.215	FBgn0003892	ptc
chr3R	12528568	12528934	12528724	53.7246	FBgn0003944	Ubx
chr2L	490588	490960	490709	45.4792	FBgn0003963	ush
chr3L	18164058	18164369	18164167	11.9887	FBgn0003997	W
chr3L	15503991	15504231	15504069	35.515	FBgn0004052	Z600
chr2R	20257202	20257462	20257303	23.4182	FBgn0004101	bs
chr2R	3471899	3472118	3471967	11.7501	FBgn0004133	blow
chr2L	13215753	13215920	13215818	13.6538	FBgn0004192	snRNA:U2:34ABb
chrX	7502010	7502567	7502330	17.8511	FBgn0004198	ct
chr3R	22709274	22709462	22709378	8.17073	FBgn0004359	T48
chr2R	17600539	17601845	17600738	74.1325	FBgn0004362	HmgD
chr2R	15998466	15999104	15998717	94.581	FBgn0004364	18w
chr3L	9847047	9847303	9847175	26.5207	FBgn0004390	Gap1
chr3L	15528320	15528560	15528419	33.2081	FBgn0004396	CrebA
chr3L	22360084	22360692	22360318	24.3495	FBgn0004449	Ten-m
chr2L	2130202	2130577	2130435	111.818	FBgn0004507	GlyP
chr2L	430902	431402	431012	17.7806	FBgn0004583	ex
chr3R	7178678	7179522	7178963	79.3141	FBgn0004595	pros
chr3R	26591246	26591686	26591417	102.256	FBgn0004606	zfh1
chr4	527328	528745	528339	92.6643	FBgn0004607	zfh2
chr2L	347992	348396	348118	34.4168	FBgn0004611	Plc21C
chr3R	14273626	14274192	14273930	47.7577	FBgn0004652	fru
chrX	7955040	7955337	7955154	90.7362	FBgn0004656	fs(1)h
chrX	7955040	7955337	7955154	90.7362	FBgn0004657	mys
chr3R	8889753	8890240	8889937	28.5574	FBgn0004666	sim
chr2L	14409440	14409966	14409748	94.4544	FBgn0004858	elB
chrX	2017137	2018065	2017523	48.7205	FBgn0004860	ph-d
chrX	2030775	2032735	2031141	58.0501	FBgn0004861	ph-p
chr3L	21233055	21233570	21233284	26.3219	FBgn0004865	Eip78C
chr3L	1098473	1099043	1098860	54.4423	FBgn0004870	bab1
chr2L	3771588	3771790	3771664	21.8266	FBgn0004893	bowl
chr2R	5988966	5989379	5989183	23.0171	FBgn0004907	14-3-3zeta
chr2L	8708886	8709705	8709084	52.9691	FBgn0004914	Hnf4
chr2L	107751	108310	108039	24.5481	FBgn0005278	Sam-S
chr3L	16053694	16054059	16053850	29.3028	FBgn0005536	Mbs
chr2R	19865835	19866443	19865966	44.0286	FBgn0005612	Sox14
chr2R	8868052	8868655	8868343	68.7245	FBgn0005624	Psc
chr2R	6422068	6423048	6422597	101.373	FBgn0005630	lola
chr3L	3556100	3556528	3556331	37.4566	FBgn0005640	Eip63E
chr2L	19572431	19573239	19572689	57.8376	FBgn0005672	spi
chr2L	14490310	14490879	14490516	90.436	FBgn0005771	noc
chr3L	5064975	5065176	5065062	24.2446	FBgn0005775	Con
chr2R	17926926	17927324	17927030	10.8478	FBgn0005778	PpD5
chr3R	9700799	9701109	9700948	51.8043	FBgn0008646	E5
chr3R	17259978	17260243	17260149	25.2001	FBgn0008651	lbl
chr2R	8883690	8884208	8883871	71.4922	FBgn0008654	Su(z)2
chr3R	8198549	8198800	8198658	14.6307	FBgn0010038	GstD2
chr3R	8198549	8198800	8198658	14.6307	FBgn0010039	GstD3
chr3R	8198549	8198800	8198658	14.6307	FBgn0010040	GstD4
chr3R	26106820	26107500	26106964	23.1654	FBgn0010113	hdc
chr3R	62178	62525	62374	10.4101	FBgn0010225	Gel
chr2R	12984820	12985253	12985028	37.2153	FBgn0010226	GstS1
chr2R	17591952	17592470	17592323	23.5562	FBgn0010228	HmgZ
chr2R	8341498	8341858	8341694	40.5756	FBgn0010238	Lac
chr2L	19161382	19162067	19161704	36.3826	FBgn0010300	brat
chr3R	912407	913189	912953	31.6305	FBgn0010313	corto
chr2R	5599632	5600000	5599752	20.197	FBgn0010316	dap
chr2L	594722	595115	594880	24.9484	FBgn0010323	Gsc
chr3L	16962780	16963297	16962995	40.5223	FBgn0010352	Nc73EF
chr2L	15745541	15745891	15745736	32.9764	FBgn0010382	CycE
chr2L	15056999	15057285	15057127	23.5282	FBgn0010422	TfIIS
chr2R	20874070	20874745	20874529	25.8241	FBgn0010435	emp
chr3R	12028640	12029048	12028840	40.9037	FBgn0010438	mtSSB
chr2R	17384325	17385282	17384998	60.8353	FBgn0010470	Fkbp13
chr2L	4282985	4283161	4283038	13.7426	FBgn0010473	tutl
chr2R	4039580	4039973	4039729	21.7512	FBgn0010504	kermit
chr2R	6011298	6011845	6011684	33.6652	FBgn0010531	CCS
chr2R	14244655	14245436	14245139	66.8228	FBgn0010575	sbb
chr2R	13279848	13280263	13280124	17.7149	FBgn0010620	Sip1
chr2R	14690129	14690408	14690235	37.8009	FBgn0010651	l(2)08717
chr3L	10674911	10675226	10675035	54.5857	FBgn0010762	simj
chr3R	14989593	14990671	14989842	89.4162	FBgn0010768	sqz
chr3L	1335288	1335552	1335413	17.2192	FBgn0010786	l(3)02640
chr3L	2551343	2551692	2551473	17.6795	FBgn0010905	Spn
chr3L	2585887	2586104	2586003	25.9722	FBgn0010909	msn
chr3L	9120930	9121177	9121068	22.9045	FBgn0011206	bol
chr3R	10564348	10565442	10564996	17.8146	FBgn0011217	eff
chr2L	17428026	17428321	17428180	21.6964	FBgn0011274	Dif
chr3R	17272064	17272441	17272229	41.931	FBgn0011278	lbe
chr3R	14022713	14023104	14022904	59.0771	FBgn0011481	Ssdp
chr3L	1794435	1794968	1794799	18.0882	FBgn0011573	Cdc37
chr3L	20942419	20943331	20942714	109.16	FBgn0011591	fng
chr2R	5842494	5843156	5842737	66.7943	FBgn0011656	Mef2
chrX	8785642	8786079	8785866	41.0899	FBgn0011661	Moe
chr3R	21341185	21341512	21341369	82.2104	FBgn0011666	msi
chr3R	16885567	16886799	16886499	15.7371	FBgn0011672	Mvl
chr2L	8988980	8989339	8989229	17.4471	FBgn0011705	rost
chr3L	18391447	18391822	18391602	42.8601	FBgn0011706	rpr
chr3R	26625743	26626629	26626409	22.9157	FBgn0011739	wts
chr3R	5244929	5245256	5245138	54.9308	FBgn0011740	alpha-Man-II
chrX	16227393	16227684	16227504	30.9539	FBgn0011764	Dsp1
chr3R	17444017	17444384	17444145	49.2344	FBgn0011766	E2f
chrX	12559106	12559339	12559216	31.2716	FBgn0011837	Tis11
chr2R	13279848	13280263	13280124	17.7149	FBgn0011879	tRNA:H:56E
chr2R	2028853	2029381	2028981	31.4327	FBgn0011891	tRNA:K2:42Ae
chr2R	2055847	2055997	2055962	10.6593	FBgn0011956	tRNA:R2:42Ab
chr2R	2028853	2029381	2028981	31.4327	FBgn0011958	tRNA:R2:42Ad
chr3R	3300400	3300610	3300485	9.87889	FBgn0012001	tRNA:V3b:84Dd
chr3R	4494848	4495385	4495273	22.1674	FBgn0012024	tRNA:Y1:85Aa
chr3R	4494848	4495385	4495273	22.1674	FBgn0012025	tRNA:Y1:85Ab
chr3R	4494848	4495385	4495273	22.1674	FBgn0012026	tRNA:Y1:85Ac
chr3L	14751859	14753537	14753261	93.7582	FBgn0013263	Trl
chr3R	7784094	7784318	7784188	25.4959	FBgn0013275	Hsp70Aa
chr3R	7784094	7784318	7784188	25.4959	FBgn0013276	Hsp70Ab
chr3R	8293509	8293782	8293649	101.104	FBgn0013277	Hsp70Ba
chr3R	8331270	8331734	8331498	45.7443	FBgn0013278	Hsp70Bb
chr3R	8334531	8334857	8334728	41.1926	FBgn0013279	Hsp70Bc
chr3L	11003369	11003830	11003521	40.8022	FBgn0013469	klu
chr3R	1108515	1109069	1108756	78.4416	FBgn0013576	mtd
chr3L	14214027	14214562	14214448	60.8162	FBgn0013718	nuf
chr2R	4124427	4125482	4124690	25.2223	FBgn0013726	pnut
chr2R	9812944	9813231	9813094	116.65	FBgn0013733	shot
chr2R	11209912	11210783	11210398	16.8248	FBgn0013750	Arf51F
chr2R	12578503	12578816	12578657	17.4706	FBgn0013763	CG5210
chr2R	9850034	9850331	9850207	13.5027	FBgn0013770	Cp1
chr2R	10769425	10769732	10769608	13.3002	FBgn0013771	Cyp6a9
chr2R	10761326	10761496	10761417	20.0535	FBgn0013773	Cyp6a22
chr3R	16848539	16849592	16848834	40.9867	FBgn0013812	Dhc93AB
chr3R	17444017	17444384	17444145	49.2344	FBgn0013984	InR
chr3R	2178956	2179476	2179124	15.5925	FBgn0014001	Pak
chr2L	2362918	2363266	2363055	12.5505	FBgn0014010	Rab5
chr3L	7428038	7428575	7428417	23.5063	FBgn0014011	Rac2
chr2L	12006913	12007133	12007011	16.713	FBgn0014019	Rh5
chr2R	11991862	11992101	11991961	21.3278	FBgn0014020	Rho1
chr3L	19889456	19889871	19889579	21.9622	FBgn0014037	Su(Tpl)
chr2L	16325464	16326055	16325931	15.0289	FBgn0014092	CG4278
chrX	11580243	11580549	11580388	47.755	FBgn0014133	bif
chr3R	15662375	15662872	15662678	35.8286	FBgn0014135	bnl
chr3R	12944665	12945028	12944889	63.3371	FBgn0014141	cher
chr3L	16403447	16403887	16403579	19.985	FBgn0014163	fax
chr3R	5328166	5328487	5328345	25.1942	FBgn0014380	RhoL
chr3L	3420344	3420562	3420378	22.0173	FBgn0014388	sty
chr2R	4331611	4332313	4332184	23.0041	FBgn0014469	Cyp4e2
chr2R	20518396	20518705	20518545	24.292	FBgn0015040	Cyp9c1
chr3L	9394936	9395296	9395058	16.5884	FBgn0015218	eIF-4E
chr3R	26212585	26214036	26212714	41.2212	FBgn0015221	Fer2LCH
chr3R	26212585	26214036	26212714	41.2212	FBgn0015222	Fer1HCH
chr3R	17679381	17680244	17679585	33.2572	FBgn0015229	glec
chrX	3612638	3613050	3612833	44.4819	FBgn0015286	Rala
chr3L	9689568	9690288	9690029	38.0286	FBgn0015321	UbcD4
chr3R	62178	62525	62374	10.4101	FBgn0015331	abs
chr2R	11022689	11023243	11022875	39.868	FBgn0015371	chn
chr3R	6181952	6182479	6182210	26.0428	FBgn0015396	jumu
chr2L	12822570	12822952	12822791	18.0021	FBgn0015399	kek1
chr3R	25925022	25925239	25925115	32.791	FBgn0015542	sima
chr3R	3317230	3317458	3317336	30.287	FBgn0015569	alpha-Est10
chr3R	3349422	3349985	3349678	24.9044	FBgn0015574	alpha-Est6
chr3R	3349422	3349985	3349678	24.9044	FBgn0015575	alpha-Est7
chr2L	3124700	3124975	3124801	32.7265	FBgn0015600	toc
chr2L	6339244	6339511	6339352	12.9511	FBgn0015623	Cpr
chr2R	10761326	10761496	10761417	20.0535	FBgn0015714	Cyp6a17
chr2L	6786645	6788106	6787752	67.5436	FBgn0015776	nrv1
chr2L	6786645	6788106	6787752	67.5436	FBgn0015777	nrv2
chr3R	9470615	9470969	9470741	32.7533	FBgn0015778	rin
chr2R	20680718	20681443	20680997	81.0742	FBgn0015801	Reg-5
chr3L	4624481	4624848	4624639	22.884	FBgn0015805	Rpd3
chr2R	19468134	19468554	19468320	39.4583	FBgn0015903	apt
chr3L	12602380	12602746	12602566	37.8155	FBgn0015919	caup
chr3L	4071648	4071980	4071809	42.1326	FBgn0016013	Faa
chr3L	22720829	22721314	22721164	16.2429	FBgn0016034	mael
chr2L	5306451	5306988	5306634	44.1719	FBgn0016076	vri
chr3L	9668705	9668933	9668810	21.6593	FBgn0016081	fry
chr2R	12471364	12471638	12471488	21.4596	FBgn0016131	Cdk4
chr2L	5403627	5403844	5403705	28.4346	FBgn0016660	H15
chr3L	7860146	7860853	7860622	70.0368	FBgn0016694	Pdp1
chr3L	603821	604235	604030	77.1785	FBgn0016715	Reg-2
chr3R	19747670	19748777	19747823	30.4567	FBgn0016754	sba
chr3L	19163643	19163896	19163784	59.2941	FBgn0016797	fz2
chr3R	16372562	16372839	16372671	11.8847	FBgn0016917	Stat92E
chr2L	1118927	1119625	1119065	44.404	FBgn0016926	Pino
chr2L	160501	161178	160834	31.2053	FBgn0016977	spen
chr3L	16609755	16609973	16609819	9.15935	FBgn0017572	Mo25
chr3R	7584099	7584478	7584246	15.8126	FBgn0017581	Lk6
chr3R	14069987	14070850	14070404	58.2045	FBgn0020238	14-3-3epsilon
chr2R	18576307	18576657	18576508	49.1724	FBgn0020257	ppa
chr3R	18452347	18453334	18452745	41.8854	FBgn0020278	loco
chr3L	18132233	18132583	18132397	54.2234	FBgn0020300	gk
chr2L	845741	846241	846015	20.6864	FBgn0020304	drongo
chr2L	868342	868490	868419	19.0974	FBgn0020305	dbe
chr2R	18158084	18158495	18158243	70.7504	FBgn0020307	dve
chr2L	11808775	11809123	11808892	44.5645	FBgn0020309	crol
chr3L	129284	129492	129380	40.2845	FBgn0020386	Pdk1
chr2L	16451053	16451273	16451118	19.7433	FBgn0020414	Idgf3
chr2L	16451053	16451273	16451118	19.7433	FBgn0020415	Idgf2
chr2L	3354772	3355011	3354875	21.8429	FBgn0020445	E23
chr3R	12879215	12879869	12879615	63.9785	FBgn0020493	Dad
chr3R	8843131	8843807	8843319	20.6119	FBgn0020496	CtBP
chrX	12649090	12649260	12649156	17.8421	FBgn0020513	ade5
chr3R	12589763	12590069	12589920	58.9362	FBgn0020556	bxd
chr2R	9879230	9879528	9879343	18.8822	FBgn0020620	RN-tre
chr2R	5162458	5162679	5162530	14.5738	FBgn0020621	Pkn
chr3R	19857005	19857238	19857121	49.6861	FBgn0020647	KrT95D
chr2L	4333168	4333496	4333322	23.0852	FBgn0020762	Atet
chr3R	26738075	26738441	26738258	51.3903	FBgn0020912	Ptx1
chr3L	16800168	16801055	16800866	24.3998	FBgn0021768	nudC
chr2R	11750194	11750788	11750526	11.9144	FBgn0022160	Gpo-1
chr2R	14044140	14045086	14044440	35.5654	FBgn0022238	lolal
chr2L	248114	249586	249307	22.5427	FBgn0022246	Rpp30
chr3R	27573923	27574347	27574076	15.3886	FBgn0022349	CG1910
chr4	577846	578078	577966	49.9915	FBgn0022361	Pur-alpha
chr3L	6177984	6178273	6178082	8.34718	FBgn0022699	D19B
chr2R	8476514	8477557	8477159	35.9618	FBgn0022764	Sin3A
chr3L	19642718	19643162	19642871	11.3956	FBgn0022774	Oat
chr3R	11809797	11811023	11810522	52.7252	FBgn0022787	Hel89B
chr3L	6177984	6178273	6178082	8.34718	FBgn0022935	D19A
chr3R	14409582	14410529	14409778	33.9732	FBgn0023083	fray
chr3L	13221568	13221904	13221702	31.9012	FBgn0023095	caps
chr2R	12915811	12916009	12915903	29.6835	FBgn0023172	RhoGEF2
chr2R	20680718	20681443	20680997	81.0742	FBgn0023181	Orc4
chrX	3570631	3572060	3571659	74.4792	FBgn0023215	Mnt
chrX	3566170	3566678	3566310	42.0096	FBgn0023216	Parg
chr2L	13513240	13513711	13513503	97.2144	FBgn0023407	B4
chrX	2035304	2035654	2035426	27.2748	FBgn0023507	CG3835
chrX	1835816	1835969	1835882	20.4186	FBgn0023520	CG3857
chrX	1835816	1835969	1835882	20.4186	FBgn0023521	CG3587
chrX	2187263	2187727	2187513	24.1254	FBgn0023526	CG2865
chrX	416446	417653	417292	30.0287	FBgn0023535	arg
chrX	2088327	2088622	2088479	47.9305	FBgn0023549	Mct1
chr3L	4071648	4071980	4071809	42.1326	FBgn0024179	wit
chrX	21237621	21237881	21237730	13.682	FBgn0024182	waw
chrX	17662236	17662539	17662296	34.2001	FBgn0024184	unc-4
chrX	17193702	17194311	17193875	21.4476	FBgn0024238	Fim
chr2L	3545306	3545585	3545443	78.8155	FBgn0024244	drm
chr2L	19361908	19362218	19362033	36.3809	FBgn0024245	dnt
chrX	7201364	7202129	7201705	55.3461	FBgn0024250	brk
chrX	21237621	21237881	21237730	13.682	FBgn0024251	bbx
chr3L	1008045	1008333	1008190	19.2657	FBgn0024277	trio
chr3R	10172627	10173072	10172935	27.1293	FBgn0024321	NK7.1
chr3R	14564971	14566289	14565861	18.5941	FBgn0024329	Mekk1
chr3L	1794435	1794968	1794799	18.0882	FBgn0024510	dlt
chr3R	9509840	9510052	9509943	29.9562	FBgn0024555	flfl
chr2L	16251690	16252033	16251849	31.0997	FBgn0024734	PRL-1
chrX	16730186	16730349	16730279	15.463	FBgn0024941	RSG7
chr2L	2886340	2887113	2886812	31.4148	FBgn0024947	NTPase
chrX	10678424	10678801	10678604	46.7665	FBgn0025111	Ant2
chr3L	1177049	1177500	1177322	39.8693	FBgn0025525	bab2
chrX	1965607	1966389	1965984	39.8637	FBgn0025627	CG4194
chrX	1965607	1966389	1965984	39.8637	FBgn0025628	CG4199
chrX	1965607	1966389	1965984	39.8637	FBgn0025630	CG4061
chrX	1944081	1944596	1944400	83.1569	FBgn0025631	moody
chr2L	129046	129530	129311	53.6107	FBgn0025683	CG3164
chr2R	1669355	1670540	1669876	36.3674	FBgn0025693	CG11163
chr3R	16890670	16891225	16890925	58.2954	FBgn0025865	Cortactin
chr3R	7178678	7179522	7178963	79.3141	FBgn0026063	KP78b
chr3R	7178678	7179522	7178963	79.3141	FBgn0026064	KP78a
chr3L	10849705	10850161	10849811	29.4975	FBgn0026160	tna
chr3L	3432971	3433464	3433185	18.3671	FBgn0026259	eIF5B
chr3R	6998615	6998933	6998704	18.5848	FBgn0026315	Ugt35a
chr2L	4371753	4372102	4371904	40.8732	FBgn0026319	Traf4
chr3L	13912968	13913250	13913105	42.2802	FBgn0026376	Rgl
chrX	8651876	8652067	8651970	29.297	FBgn0026411	Lim1
chr3R	632227	632393	632256	22.6498	FBgn0026417	Hus1-like
chr3L	14031149	14031620	14031465	32.9442	FBgn0026418	Hsc70Cb
chrX	15227252	15227510	15227382	21.2337	FBgn0026428	HDAC6
chr3L	2170836	2171329	2170963	15.5722	FBgn0026570	CG5704
chr3L	2192015	2192425	2192214	34.699	FBgn0026593	CG5707
chr3R	565254	565648	565459	52.2415	FBgn0026620	tacc
chr3R	15466746	15467194	15467013	53.3178	FBgn0026753	Vha13
chr2R	2519736	2520716	2519988	52.451	FBgn0026761	Trap1
chr2L	107751	108310	108039	24.5481	FBgn0026787	Nhe1
chr4	577846	578078	577966	49.9915	FBgn0026869	Thd1
chrX	1129024	1129406	1129140	40.5025	FBgn0026876	CG11403
chrX	6892411	6892931	6892629	32.4381	FBgn0027106	inx7
chrX	6892411	6892931	6892629	32.4381	FBgn0027108	inx2
chrX	7840901	7841289	7841021	13.939	FBgn0027280	l(1)G0193
chr3R	5399270	5399437	5399384	22.1008	FBgn0027338	Kap-alpha3
chr3L	22828136	22829170	22828662	119.937	FBgn0027339	jim
chr2L	8433561	8433819	8433666	18.0937	FBgn0027490	D12
chr2L	12055853	12056330	12056022	53.7629	FBgn0027505	rab3-GAP
chr2R	16207539	16208195	16207679	26.3822	FBgn0027529	CG8920
chrX	5895253	5895735	5895380	60.2424	FBgn0027546	CG4766
chr3R	23751226	23751382	23751273	23.1117	FBgn0027579	CG5508
chr2R	5749295	5749692	5749455	29.3875	FBgn0027580	CG1516
chr2R	20655474	20655951	20655784	92.5519	FBgn0027590	CG16936
chr2L	472184	472486	472327	83.8436	FBgn0027592	MED15
chrX	14841563	14841724	14841641	12.3472	FBgn0027601	pdgy
chr3R	9189919	9190365	9190115	35.0827	FBgn0027610	Dic1
chr3R	26352721	26353302	26352815	10.5726	FBgn0027654	jdp
chr3R	11726884	11727536	11727168	63.3571	FBgn0027657	glob1
chr3L	17414458	17414799	17414638	42.6442	FBgn0027660	blot
chr2R	14301047	14301237	14301116	22.0108	FBgn0027835	Dp1
chr2R	14058961	14059163	14059057	16.5805	FBgn0027836	Dgp-1
chr3R	21706401	21706809	21706550	36.6152	FBgn0027865	Tsp96F
chr3R	133324	133873	133524	48.0747	FBgn0027930	MP1
chr2L	8416440	8416705	8416487	24.7297	FBgn0027932	Akap200
chr3L	15503991	15504231	15504069	35.515	FBgn0028377	gdl-ORF39
chr3L	19285348	19286228	19285693	59.0816	FBgn0028380	fal
chr2L	7422425	7422768	7422606	26.9508	FBgn0028387	chm
chr2L	8534954	8535440	8535203	68.3502	FBgn0028394	CG17834
chrX	15985589	15985741	15985616	15.5213	FBgn0028397	Tob
chr3L	16403447	16403887	16403579	19.985	FBgn0028399	TMS1
chr2L	6088404	6088732	6088494	30.1685	FBgn0028420	Kr-h1
chr2L	12055853	12056330	12056022	53.7629	FBgn0028425	JhI-21
chr2L	4333168	4333496	4333322	23.0852	FBgn0028482	CG16857
chr2L	11528174	11528318	11528244	20.4533	FBgn0028490	CG31705
chr2R	13604739	13605082	13604882	54.6558	FBgn0028494	CG6424
chr2R	14375405	14375818	14375537	17.0309	FBgn0028496	CG30116
chr3R	14024086	14025148	14024627	55.5308	FBgn0028499	CG7985
chr2L	16422660	16423212	16422818	45.4585	FBgn0028523	CG5888
chrX	1170383	1170987	1170593	33.0644	FBgn0028550	Atf3
chr2L	15911770	15912038	15911915	30.1568	FBgn0028645	beat-Ib
chr3R	26275771	26276354	26276195	149.346	FBgn0028646	aralar1
chr3R	14224795	14224943	14224825	13.7561	FBgn0028670	Vha100-2
chr3R	4878720	4879029	4878849	66.9898	FBgn0028708	Mst85C
chr3R	5934861	5935386	5935065	70.1035	FBgn0028734	Fmr1
chr2R	20680718	20681443	20680997	81.0742	FBgn0028738	ETH
chr2R	13679975	13680384	13680148	54.2699	FBgn0028743	CG5036
chr2R	13679975	13680384	13680148	54.2699	FBgn0028744	CG5033
chr3L	20394637	20395005	20394810	45.778	FBgn0028978	trbl
chr2R	2766090	2766357	2766209	56.1105	FBgn0028985	Spn4
chrX	5907044	5907755	5907348	64.6364	FBgn0029003	mab-21
chr2R	5328196	5329309	5328461	25.6377	FBgn0029092	ced-6
chr2L	868342	868490	868419	19.0974	FBgn0029095	aru
chr3L	15228501	15228845	15228602	15.7726	FBgn0029114	Tollo
chrX	7596608	7596950	7596786	127.593	FBgn0029504	CHES-1-like
chrX	2088327	2088622	2088479	47.9305	FBgn0029603	CG14053
chrX	4218663	4219272	4218871	27.0072	FBgn0029705	CG12693
chrX	5411042	5411431	5411231	27.6849	FBgn0029771	CG12730
chrX	5640789	5641449	5641043	184.748	FBgn0029798	CG4078
chrX	5874795	5875462	5874986	25.4492	FBgn0029830	Grip
chrX	6594445	6594745	6594606	20.887	FBgn0029894	CG14440
chrX	6594445	6594745	6594606	20.887	FBgn0029895	CG14441
chrX	7090141	7090318	7090181	16.6058	FBgn0029939	CG9650
chrX	7193778	7194313	7193974	109.319	FBgn0029941	CG1677
chrX	7824364	7825292	7824633	26.2304	FBgn0029979	CG10777
chrX	7824364	7825292	7824633	26.2304	FBgn0029980	CG10778
chrX	7928433	7929080	7928625	44.1938	FBgn0029990	CG2233
chrX	7986091	7987702	7986247	61.0333	FBgn0029996	Ubc-E2H
chrX	8764125	8764322	8764206	20.6932	FBgn0030065	CG12075
chrX	10219516	10219754	10219541	13.9245	FBgn0030189	CG2909
chrX	10666354	10666649	10666489	48.9523	FBgn0030228	CG1826
chrX	10666354	10666649	10666489	48.9523	FBgn0030234	CG15211
chrX	11048540	11049140	11049010	14.4266	FBgn0030274	CG1908
chrX	11048540	11049140	11049010	14.4266	FBgn0030276	Dlic
chrX	11607778	11609138	11607918	19.2074	FBgn0030328	Amun
chrX	11607778	11609138	11607918	19.2074	FBgn0030329	prtp
chrX	11711791	11711981	11711858	19.1916	FBgn0030336	CG1578
chrX	12644648	12645050	12644862	47.0883	FBgn0030418	CG4004
chrX	13025003	13025603	13025167	48.8532	FBgn0030451	CG15717
chrX	13025003	13025603	13025167	48.8532	FBgn0030452	MFS10
chrX	13178279	13178509	13178367	15.1138	FBgn0030465	CG15743
chrX	13196704	13197064	13196863	20.1548	FBgn0030469	CG15745
chrX	13290050	13290356	13290206	28.3472	FBgn0030482	CG1673
chrX	13535642	13536326	13536013	40.5824	FBgn0030505	NFAT
chrX	14733895	14734402	14734041	19.679	FBgn0030584	CG14407
chrX	14937611	14938420	14937742	24.4925	FBgn0030600	hiw
chrX	14937611	14938420	14937742	24.4925	FBgn0030603	CG5541
chrX	15192634	15193106	15192775	22.5462	FBgn0030625	CG5877
chrX	15227252	15227510	15227382	21.2337	FBgn0030628	CG9114
chrX	15705670	15706139	15705834	41.0664	FBgn0030696	CG8509
chrX	16226634	16226926	16226767	15.0575	FBgn0030742	CG9919
chrX	16227393	16227684	16227504	30.9539	FBgn0030743	CG9921
chrX	16729532	16729703	16729641	18.4005	FBgn0030797	CG13004
chrX	17194471	17194786	17194668	17.0333	FBgn0030838	CG5445
chrX	18206609	18206872	18206769	54.9284	FBgn0030912	CG6023
chrX	19192705	19192956	19192781	12.7849	FBgn0031011	CG8034
chrX	19255176	19255440	19255300	13.3385	FBgn0031016	kek5
chrX	19577022	19577241	19577124	78.2931	FBgn0031057	Ubqn
chrX	19744933	19745734	19745437	40.7783	FBgn0031078	CG11943
chrX	20052865	20053398	20053171	62.2732	FBgn0031090	Rab35
chrX	20052865	20053398	20053171	62.2732	FBgn0031091	CG9576
chrX	20067528	20067675	20067585	19.2472	FBgn0031094	CG9578
chrX	20282752	20283014	20282876	46.0469	FBgn0031107	HERC2
chrX	20282752	20283014	20282876	46.0469	FBgn0031108	CG15459
chrX	20527998	20528471	20528130	33.1435	FBgn0031126	Cyp6v1
chrX	20942701	20943195	20943001	31.9421	FBgn0031150	bves
chr2L	5707	5974	5818	14.2548	FBgn0031208	CG11023
chr2L	72141	72686	72522	19.6716	FBgn0031213	galectin
chr2L	129046	129530	129311	53.6107	FBgn0031228	CG11455
chr2L	354987	355338	355145	54.8651	FBgn0031250	Ent1
chr2L	472184	472486	472327	83.8436	FBgn0031258	CG4297
chr2L	1185830	1186446	1186149	22.5538	FBgn0031320	CG5126
chr2L	1185830	1186446	1186149	22.5538	FBgn0031321	Tgt
chr2L	1185830	1186446	1186149	22.5538	FBgn0031322	CG5001
chr2L	1720923	1721131	1721023	19.0864	FBgn0031359	CG18317
chr2L	1734346	1734622	1734480	13.6985	FBgn0031361	CG17652
chr2L	2130202	2130577	2130435	111.818	FBgn0031389	CG4259
chr2L	2242142	2242512	2242285	85.9798	FBgn0031405	CG4267
chr2L	2753007	2753325	2753172	84.7743	FBgn0031453	CG9894
chr2L	2804880	2805124	2805001	26.4312	FBgn0031461	daw
chr2L	3301851	3302496	3302244	12.8145	FBgn0031516	CG9663
chr2L	3301851	3302496	3302244	12.8145	FBgn0031518	CG3277
chr2L	3534106	3534607	3534307	28.2197	FBgn0031550	Che-13
chr2L	4197351	4197570	4197444	37.3711	FBgn0031589	CG3714
chr2L	5800135	5800327	5800189	15.2965	FBgn0031738	CG9171
chr2L	5800135	5800327	5800189	15.2965	FBgn0031739	CG14005
chr2L	5800135	5800327	5800189	15.2965	FBgn0031740	CG7239
chr2L	5879472	5879616	5879557	12.4497	FBgn0031745	CG8965
chr2L	5907327	5907471	5907381	8.83696	FBgn0031749	CG14000
chr2L	6339244	6339511	6339352	12.9511	FBgn0031799	Pez
chr2L	6612465	6612625	6612542	22.0016	FBgn0031836	CG11050
chr2L	6709059	6709211	6709152	20.2634	FBgn0031850	Tsp
chr2L	7188684	7188892	7188788	38.6299	FBgn0031894	CG4496
chr2L	7188684	7188892	7188788	38.6299	FBgn0031895	CG4497
chr2L	7809600	7809822	7809715	15.2278	FBgn0031952	cdc14
chr2L	8416440	8416705	8416487	24.7297	FBgn0032042	CG13398
chr2L	8708886	8709705	8709084	52.9691	FBgn0032061	CG9314
chr2L	8951099	8951680	8951540	19.3868	FBgn0032078	C1GalTA
chr2L	8951099	8951680	8951540	19.3868	FBgn0032079	CG31886
chr2L	9781940	9782629	9782260	118.861	FBgn0032147	IP3K1
chr2L	9908560	9908788	9908664	21.5762	FBgn0032156	CG13124
chr2L	9908560	9908788	9908664	21.5762	FBgn0032157	Etl1
chr2L	10156455	10156738	10156640	18.4119	FBgn0032187	CG4839
chr2L	11045060	11045699	11045291	44.2413	FBgn0032330	Samuel
chr2L	11155563	11156071	11155799	55.6895	FBgn0032350	CG6287
chr2L	11808775	11809123	11808892	44.5645	FBgn0032378	CycY
chr2L	12003132	12004078	12003557	15.822	FBgn0032393	CG12264
chr2L	12003132	12004078	12003557	15.822	FBgn0032394	CG6746
chr2L	12055853	12056330	12056022	53.7629	FBgn0032404	RpL7-like
chr2L	12617996	12618328	12618201	49.0609	FBgn0032439	Ref2
chr2L	13215753	13215920	13215818	13.6538	FBgn0032484	kek4
chr2L	13215753	13215920	13215818	13.6538	FBgn0032485	CG9426
chr2L	16532884	16533177	16533066	35.7361	FBgn0032587	CG5953
chr2L	18121425	18122169	18121985	23.3688	FBgn0032666	CG5758
chr2L	18626906	18627227	18627020	16.1409	FBgn0032694	MESR3
chr2L	19398896	19399163	19399012	53.7622	FBgn0032775	CG17544
chr2L	19423403	19423764	19423547	36.6217	FBgn0032779	CG16771
chr2L	19528230	19528416	19528317	22.7963	FBgn0032799	CG10166
chr2L	19528230	19528416	19528317	22.7963	FBgn0032800	CG10137
chr2L	19528230	19528416	19528317	22.7963	FBgn0032801	CG10165
chr2L	19548211	19548599	19548404	25.1644	FBgn0032805	CG10337
chr2L	20821696	20821904	20821762	19.2103	FBgn0032888	CheB38c
chr2L	20936024	20936405	20936166	25.5306	FBgn0032908	CG9270
chr2L	21096650	21096889	21096768	19.0459	FBgn0032914	CG14397
chr2L	21096650	21096889	21096768	19.0459	FBgn0032915	CG12050
chr2L	21347671	21347973	21347824	22.9392	FBgn0032943	Tsp39D
chr2L	21899283	21899550	21899382	27.6628	FBgn0032965	CG11629
chr2R	1660543	1660836	1660687	32.0151	FBgn0033039	gp210
chr2R	2026197	2026385	2026287	16.2942	FBgn0033063	CG14589
chr2R	2129411	2129768	2129677	16.9424	FBgn0033075	Pld
chr2R	2766090	2766357	2766209	56.1105	FBgn0033112	Spn42Db
chr2R	3136325	3136855	3136588	53.0747	FBgn0033153	Gadd45
chr2R	3269268	3269612	3269470	39.9602	FBgn0033159	Dscam
chr2R	3553186	3553375	3553270	11.7233	FBgn0033204	CG2065
chr2R	3553186	3553375	3553270	11.7233	FBgn0033205	CG2064
chr2R	3553186	3553375	3553270	11.7233	FBgn0033206	CG12042
chr2R	4331611	4332313	4332184	23.0041	FBgn0033292	Cyp4ad1
chr2R	4519930	4520275	4520089	18.9398	FBgn0033317	CG8635
chr2R	5965649	5965984	5965798	26.9426	FBgn0033483	egr
chr2R	5988966	5989379	5989183	23.0171	FBgn0033485	RpLP0-like
chr2R	6190203	6190723	6190451	22.8747	FBgn0033504	CAP
chr2R	6308730	6309648	6309001	41.2426	FBgn0033518	Prx2540-2
chr2R	6308730	6309648	6309001	41.2426	FBgn0033519	CG11825
chr2R	6315762	6316680	6315973	70.5345	FBgn0033521	CG12896
chr2R	6365224	6365598	6365428	34.2848	FBgn0033528	trsn
chr2R	6504940	6505269	6505073	35.0281	FBgn0033538	CG11883
chr2R	7060989	7061361	7061144	47.3053	FBgn0033579	CG13229
chr2R	7254879	7255154	7255010	49.31	FBgn0033627	CG13204
chr2R	7271587	7271865	7271696	23.8845	FBgn0033631	Sod3
chr2R	7492282	7493003	7492591	67.6635	FBgn0033636	tou
chr2R	7525026	7525263	7525136	37.4479	FBgn0033638	CG9005
chr2R	7545254	7545750	7545591	23.7966	FBgn0033640	CG13198
chr2R	8146689	8146990	8146861	18.9837	FBgn0033706	Vha36-2
chr2R	8341498	8341858	8341694	40.5756	FBgn0033739	Dyb
chr2R	8566859	8567414	8567212	75.9247	FBgn0033766	CG8771
chr2R	8843343	8843628	8843467	20.0211	FBgn0033787	CG13321
chr2R	9427218	9427639	9427407	34.3768	FBgn0033853	CG6145
chr2R	9844775	9845870	9845694	25.3097	FBgn0033886	CG13349
chr2R	10761326	10761496	10761417	20.0535	FBgn0033978	Cyp6a23
chr2R	10769425	10769732	10769608	13.3002	FBgn0033980	Cyp6a20
chr2R	10852019	10852492	10852260	47.9081	FBgn0033987	ckn
chr2R	11209912	11210783	11210398	16.8248	FBgn0034009	CG8155
chr2R	11236916	11237296	11237112	84.6397	FBgn0034013	unc-5
chr2R	11815848	11816044	11815918	12.3227	FBgn0034049	bdg
chr2R	11991862	11992101	11991961	21.3278	FBgn0034073	CG8414
chr2R	12074905	12075513	12075276	33.3917	FBgn0034086	CG8441
chr2R	12074905	12075513	12075276	33.3917	FBgn0034087	clu
chr2R	12097848	12098112	12097953	47.1712	FBgn0034091	mrj
chr2R	13756590	13757211	13756839	26.2264	FBgn0034282	Mapmodulin
chr2R	14044140	14045086	14044440	35.5654	FBgn0034307	CG10914
chr2R	14176172	14176521	14176315	31.7293	FBgn0034321	CG14502
chr2R	14192275	14192801	14192437	63.8829	FBgn0034327	CG14505
chr2R	14288043	14288291	14288128	22.2915	FBgn0034335	GstE1
chr2R	14390874	14391814	14391053	26.0049	FBgn0034354	CG5224
chr2R	14416252	14416618	14416394	39.2032	FBgn0034356	CG10924
chr2R	14499128	14499484	14499309	41.7693	FBgn0034360	CG10927
chr2R	14540137	14540687	14540460	71.9172	FBgn0034371	SP2637
chr2R	14693652	14694164	14693861	49.5248	FBgn0034394	CG15096
chr2R	15344227	15344819	15344595	14.9727	FBgn0034447	CG7744
chr2R	15713758	15714266	15713946	50.0671	FBgn0034476	Toll-7
chr2R	16207539	16208195	16207679	26.3822	FBgn0034502	CG13871
chr2R	16885509	16885816	16885673	57.6189	FBgn0034570	CG10543
chr2R	17066375	17066756	17066476	14.4586	FBgn0034601	CG4286
chr2R	17090134	17090458	17090276	16.2075	FBgn0034603	Glycogenin
chr2R	17384325	17385282	17384998	60.8353	FBgn0034631	CG10496
chr2R	17533189	17534739	17533582	49.0701	FBgn0034644	CG10082
chr2R	18024256	18024656	18024398	82.7443	FBgn0034700	CG11269
chr2R	18198821	18198965	18198834	12.1614	FBgn0034718	wdp
chr2R	18260709	18260928	18260833	25.0697	FBgn0034720	Liprin-gamma
chr2R	18260709	18260928	18260833	25.0697	FBgn0034722	Rtf1
chr2R	18480406	18480603	18480503	39.5437	FBgn0034739	CG3927
chr2R	18821680	18822014	18821815	16.6722	FBgn0034800	CG3788
chr2R	18821680	18822014	18821815	16.6722	FBgn0034802	CG3800
chr2R	19554326	19554713	19554470	150.297	FBgn0034886	Pde8
chr2R	19865835	19866443	19865966	44.0286	FBgn0034948	Gadd34
chr2R	20181485	20181688	20181576	26.6079	FBgn0034999	CG3394
chr2R	20287096	20287499	20287260	16.1222	FBgn0035001	slik
chr2R	20430833	20431352	20431074	35.6159	FBgn0035021	CG4622
chr2R	20430833	20431352	20431074	35.6159	FBgn0035023	itp
chr2R	20518396	20518705	20518545	24.292	FBgn0035041	CG13594
chr2R	20655474	20655951	20655784	92.5519	FBgn0035059	CG3894
chr2R	20655474	20655951	20655784	92.5519	FBgn0035060	Eps-15
chr2R	20830216	20830426	20830310	14.0296	FBgn0035083	Tina-1
chr2R	20830216	20830426	20830310	14.0296	FBgn0035084	CG15861
chr2R	20874070	20874745	20874529	25.8241	FBgn0035091	CG3829
chr3L	542857	543778	543405	47.9825	FBgn0035140	CG17180
chr3L	542857	543778	543405	47.9825	FBgn0035141	Cypl
chr3L	548434	549346	548903	59.7872	FBgn0035142	hipk
chr3L	603821	604235	604030	77.1785	FBgn0035146	CG13893
chr3L	648562	648968	648768	36.5892	FBgn0035147	Gale
chr3L	685023	685815	685602	38.5578	FBgn0035153	ebd1
chr3L	685023	685815	685602	38.5578	FBgn0035154	CG3344
chr3L	749082	749656	749319	88.6474	FBgn0035160	CG13897
chr3L	881597	882304	882052	91.3275	FBgn0035173	CG13907
chr3L	1335288	1335552	1335413	17.2192	FBgn0035211	CG2211
chr3L	1586431	1586778	1586605	100.49	FBgn0035237	CG13917
chr3L	1692417	1692776	1692512	24.0231	FBgn0035257	CG12011
chr3L	1692417	1692776	1692512	24.0231	FBgn0035260	CG7991
chr3L	2151523	2152250	2151787	53.37	FBgn0035308	CG15822
chr3L	2170836	2171329	2170963	15.5722	FBgn0035309	CG15879
chr3L	2170836	2171329	2170963	15.5722	FBgn0035311	CR15821
chr3L	2170836	2171329	2170963	15.5722	FBgn0035312	CG15820
chr3L	2478452	2478801	2478583	20.0739	FBgn0035344	Cyp4d20
chr3L	2489846	2490410	2490118	122.136	FBgn0035346	CG1146
chr3L	2489846	2490410	2490118	122.136	FBgn0035347	CG33232
chr3L	3192913	3193385	3193149	46.5419	FBgn0035414	CG14965
chr3L	3225969	3226579	3226285	103.82	FBgn0035423	CG17737
chr3L	3225969	3226579	3226285	103.82	FBgn0035424	CG11505
chr3L	3239634	3240729	3240012	41.844	FBgn0035425	CG17746
chr3L	4102687	4102884	4102767	17.3427	FBgn0035497	CG14995
chr3L	4102687	4102884	4102767	17.3427	FBgn0035498	Fit1
chr3L	4413776	4414273	4414012	56.6303	FBgn0035542	DOR
chr3L	6956328	6956645	6956501	14.911	FBgn0035724	CG10064
chr3L	7428038	7428575	7428417	23.5063	FBgn0035782	CG14835
chr3L	9370352	9370913	9370478	23.0232	FBgn0035982	CG4461
chr3L	9394172	9394450	9394315	16.0846	FBgn0035983	CG4080
chr3L	9607816	9608041	9607994	15.4936	FBgn0036017	CG3280
chr3L	9685563	9686057	9685818	60.2203	FBgn0036030	CG6767
chr3L	11285360	11285609	11285516	13.6561	FBgn0036152	CG6175
chr3L	12483091	12483445	12483240	19.0813	FBgn0036288	CG10660
chr3L	12483091	12483445	12483240	19.0813	FBgn0036289	CG10657
chr3L	14031149	14031620	14031465	32.9442	FBgn0036403	CG6661
chr3L	14214027	14214562	14214448	60.8162	FBgn0036415	CG7768
chr3L	14699632	14699934	14699734	21.8552	FBgn0036441	CG13476
chr3L	14751859	14753537	14753261	93.7582	FBgn0036446	CG9384
chr3L	14774100	14774624	14774320	22.3971	FBgn0036449	bmm
chr3L	15072416	15072771	15072610	26.6222	FBgn0036474	Or71a
chr3L	15297582	15297960	15297776	21.6491	FBgn0036492	Best3
chr3L	15297582	15297960	15297776	21.6491	FBgn0036493	CG7255
chr3L	15507493	15507892	15507648	40.7216	FBgn0036503	CG13454
chr3L	15619167	15619475	15619256	8.6028	FBgn0036522	CG7372
chr3L	15818752	15819398	15818836	12.7391	FBgn0036534	Dcp2
chr3L	16151333	16151549	16151446	11.1155	FBgn0036576	CG5151
chr3L	16696230	16696406	16696304	12.8993	FBgn0036654	CG9692
chr3L	16800168	16801055	16800866	24.3998	FBgn0036663	CG9674
chr3L	16800168	16801055	16800866	24.3998	FBgn0036665	CG13024
chr3L	17005241	17005393	17005287	19.6148	FBgn0036684	CG3764
chr3L	17005241	17005393	17005287	19.6148	FBgn0036685	CG6664
chr3L	17480060	17480778	17480549	45.1469	FBgn0036731	CG6333
chr3L	17480060	17480778	17480549	45.1469	FBgn0036732	Oatp74D
chr3L	17612398	17612642	17612462	38.5472	FBgn0036740	CG6259
chr3L	17733548	17733753	17733635	11.6707	FBgn0036749	CG7460
chr3L	17850327	17850638	17850477	11.7233	FBgn0036764	CG5535
chr3L	17872006	17872370	17872150	17.7335	FBgn0036765	CG7408
chr3L	17906329	17906577	17906469	19.1502	FBgn0036772	CG5290
chr3L	18833557	18833789	18833674	19.1889	FBgn0036816	Indy
chr3L	18860760	18860970	18860833	19.1608	FBgn0036818	CG14074
chr3L	18860760	18860970	18860833	19.1608	FBgn0036819	dysb
chr3L	18860760	18860970	18860833	19.1608	FBgn0036820	CG6852
chr3L	18884043	18884311	18884180	31.5243	FBgn0036821	CG3961
chr3L	18884043	18884311	18884180	31.5243	FBgn0036822	CG11637
chr3L	18884043	18884311	18884180	31.5243	FBgn0036824	CG3902
chr3L	18989619	18989874	18989711	22.151	FBgn0036837	CG18135
chr3L	18989619	18989874	18989711	22.151	FBgn0036838	CG3808
chr3L	19071513	19072669	19072464	43.8986	FBgn0036844	Mkp3
chr3L	19084662	19085070	19084872	20.8036	FBgn0036846	MESR6
chr3L	19285348	19286228	19285693	59.0816	FBgn0036862	Gbs-76A
chr3L	19626060	19626356	19626186	29.6664	FBgn0036896	wnd
chr3L	19642718	19643162	19642871	11.3956	FBgn0036899	tey
chr3L	20533346	20533680	20533503	19.6026	FBgn0037012	Rcd2
chr3L	20723298	20723851	20723569	56.5671	FBgn0037016	CG13252
chr3L	20778263	20778698	20778538	15.2166	FBgn0037021	CG11399
chr3L	20778263	20778698	20778538	15.2166	FBgn0037022	CG11396
chr3L	21019355	21019692	21019493	56.6211	FBgn0037044	CG10585
chr3L	22174990	22175273	22175120	10.0135	FBgn0037153	olf413
chr3L	22610421	22610754	22610582	12.4426	FBgn0037171	CG14459
chr3L	22720829	22721314	22721164	16.2429	FBgn0037184	CG14450
chr3L	22720829	22721314	22721164	16.2429	FBgn0037185	CG11367
chr3L	22828136	22829170	22828662	119.937	FBgn0037195	CG11226
chr3L	22903338	22903635	22903482	59.133	FBgn0037206	CG12768
chr3L	22938157	22938890	22938595	63.2152	FBgn0037207	Mes2
chr3R	133324	133873	133524	48.0747	FBgn0037231	vps24
chr3R	186623	186868	186744	17.9256	FBgn0037238	CG1090
chr3R	204456	204703	204566	34.4959	FBgn0037239	CG11739
chr3R	3012651	3013244	3012836	12.4505	FBgn0037482	CG10055
chr3R	3300400	3300610	3300485	9.87889	FBgn0037504	CG1142
chr3R	3619580	3619886	3619730	17.9696	FBgn0037517	CG10086
chr3R	3619580	3619886	3619730	17.9696	FBgn0037518	CG2641
chr3R	3853159	3853455	3853297	20.919	FBgn0037541	CG2747
chr3R	3931626	3932235	3931939	19.9167	FBgn0037548	CG7900
chr3R	4494848	4495385	4495273	22.1674	FBgn0037606	CG8032
chr3R	4494848	4495385	4495273	22.1674	FBgn0037607	CG8036
chr3R	4806376	4806631	4806470	19.5391	FBgn0037646	CAHbeta
chr3R	4806376	4806631	4806470	19.5391	FBgn0037647	RagA
chr3R	4882744	4883861	4883450	71.7993	FBgn0037659	Kdm2
chr3R	5328166	5328487	5328345	25.1942	FBgn0037700	CG8149
chr3R	5376352	5377406	5376593	121.964	FBgn0037705	mura
chr3R	5376352	5377406	5376593	121.964	FBgn0037707	RnpS1
chr3R	5399270	5399437	5399384	22.1008	FBgn0037714	CG9396
chr3R	5399270	5399437	5399384	22.1008	FBgn0037715	CG9399
chr3R	5995918	5996515	5996276	53.6657	FBgn0037796	CG12814
chr3R	6712714	6712946	6712826	33.3477	FBgn0037853	CG14696
chr3R	6714403	6715306	6715153	62.1052	FBgn0037855	CG6621
chr3R	6714403	6715306	6715153	62.1052	FBgn0037856	CG4674
chr3R	7023863	7024055	7023938	19.3662	FBgn0037870	CG18577
chr3R	7394696	7395065	7394855	74.9039	FBgn0037912	sea
chr3R	7394696	7395065	7394855	74.9039	FBgn0037913	fabp
chr3R	7712807	7713047	7712924	79.2664	FBgn0037960	mthl5
chr3R	7808168	7808629	7808437	22.373	FBgn0037974	CG12224
chr3R	7808168	7808629	7808437	22.373	FBgn0037975	CG3397
chr3R	7818799	7819288	7819134	30.5904	FBgn0037976	Tk
chr3R	8194898	8195251	8195059	44.362	FBgn0038020	GstD9
chr3R	9509840	9510052	9509943	29.9562	FBgn0038168	omd
chr3R	9883104	9883492	9883330	43.598	FBgn0038197	foxo
chr3R	9934108	9934424	9934286	30.6601	FBgn0038202	CG12402
chr3R	9934108	9934424	9934286	30.6601	FBgn0038203	Or88a
chr3R	10114809	10114979	10114896	18.038	FBgn0038220	CG12207
chr3R	10383707	10384131	10383843	26.8732	FBgn0038237	Pde6
chr3R	10383707	10384131	10383843	26.8732	FBgn0038238	CG14854
chr3R	10547960	10548504	10548177	42.1687	FBgn0038256	CG7530
chr3R	10574668	10575564	10575097	48.8476	FBgn0038257	smp-30
chr3R	10574668	10575564	10575097	48.8476	FBgn0038258	CG7362
chr3R	10959322	10960336	10959778	52.4571	FBgn0038290	CG6912
chr3R	11302140	11302351	11302247	36.6369	FBgn0038341	CG14869
chr3R	11362892	11363327	11363072	16.2332	FBgn0038347	CG18522
chr3R	11362892	11363327	11363072	16.2332	FBgn0038348	CG18519
chr3R	12028640	12029048	12028840	40.9037	FBgn0038407	CG6126
chr3R	12278746	12278947	12278823	12.6342	FBgn0038431	CG10405
chr3R	12828362	12828772	12828552	21.6047	FBgn0038464	CG16941
chr3R	12828362	12828772	12828552	21.6047	FBgn0038465	Irc
chr3R	13994269	13994564	13994415	48.8861	FBgn0038570	Prx5
chr3R	13994269	13994564	13994415	48.8861	FBgn0038571	CG7215
chr3R	14224795	14224943	14224825	13.7561	FBgn0038617	CG12333
chr3R	14409582	14410529	14409778	33.9732	FBgn0038627	CG7694
chr3R	14568535	14568691	14568575	17.7623	FBgn0038649	CG7718
chr3R	15289736	15290095	15289876	23.382	FBgn0038708	CG6255
chr3R	15466746	15467194	15467013	53.3178	FBgn0038721	CG16718
chr3R	15715593	15716706	15715831	76.8765	FBgn0038744	CG4733
chr3R	16135096	16135331	16135170	14.7331	FBgn0038784	CG4362
chr3R	16391335	16391601	16391490	19.6343	FBgn0038803	CG5191
chr3R	16391335	16391601	16391490	19.6343	FBgn0038804	CG10877
chr3R	16400291	16400689	16400446	11.0518	FBgn0038805	TFAM
chr3R	16608193	16609001	16608473	93.2766	FBgn0038826	CG17838
chr3R	16739862	16740094	16739979	11.1631	FBgn0038842	CG5630
chr3R	16922411	16922561	16922503	22.766	FBgn0038853	RhoGAP93B
chr3R	16922411	16922561	16922503	22.766	FBgn0038854	CG7044
chr3R	17121714	17122452	17122245	18.8289	FBgn0038880	SIFR
chr3R	17174642	17174971	17174763	11.9658	FBgn0038881	CG16791
chr3R	17700843	17701020	17700898	42.8172	FBgn0038912	CG6656
chr3R	19000885	19001483	19001170	74.2797	FBgn0039061	Ir
chr3R	19548277	19549171	19548542	45.3267	FBgn0039108	CG10232
chr3R	19548277	19549171	19548542	45.3267	FBgn0039109	CG10365
chr3R	19747670	19748777	19747823	30.4567	FBgn0039125	CG5857
chr3R	19768716	19769055	19768881	42.0473	FBgn0039131	CG12268
chr3R	19788537	19788853	19788663	16.1103	FBgn0039132	AP-1sigma
chr3R	19857005	19857238	19857121	49.6861	FBgn0039139	Ime4
chr3R	20391269	20392054	20391565	58.3836	FBgn0039209	CG13624
chr3R	20412217	20412538	20412381	39.9253	FBgn0039210	CG13625
chr3R	20476769	20477254	20476989	47.54	FBgn0039214	CG5794
chr3R	20875767	20876071	20875881	14.7626	FBgn0039265	CG11790
chr3R	20875767	20876071	20875881	14.7626	FBgn0039266	CG11791
chr3R	21118591	21118873	21118722	13.6326	FBgn0039316	CG11893
chr3R	21154319	21155317	21154476	43.3964	FBgn0039328	CHKov2
chr3R	21154319	21155317	21154476	43.3964	FBgn0039329	CG10669
chr3R	21706401	21706809	21706550	36.6152	FBgn0039381	Sppl
chr3R	22055721	22056147	22055877	137.477	FBgn0039419	CG12290
chr3R	22286934	22287425	22287171	43.6094	FBgn0039429	CG14238
chr3R	22286934	22287425	22287171	43.6094	FBgn0039430	CG5455
chr3R	22361378	22361554	22361476	18.1488	FBgn0039431	CG6490
chr3R	22805950	22806320	22806124	40.6989	FBgn0039467	CG14253
chr3R	23107107	23107664	23107480	28.5322	FBgn0039507	mrt
chr3R	23107107	23107664	23107480	28.5322	FBgn0039508	CG3368
chr3R	25516850	25517175	25516992	52.4511	FBgn0039682	Obp99c
chr3R	25516850	25517175	25516992	52.4511	FBgn0039683	dmrt99B
chr3R	26559810	26560084	26559962	9.36641	FBgn0039798	CG11313
chr3R	12060773	12061711	12061522	100.45	FBgn0040071	tara
chr2L	16286463	16287929	16286739	43.3028	FBgn0040079	pkaap
chr3L	15818752	15819398	15818836	12.7391	FBgn0040230	dbo
chr3R	5995918	5996515	5996276	53.6657	FBgn0040238	Best1
chr3R	6998615	6998933	6998704	18.5848	FBgn0040250	Ugt86Dj
chr3R	6982439	6982934	6982705	88.4418	FBgn0040257	Ugt86Dc
chr3R	6982439	6982934	6982705	88.4418	FBgn0040259	Ugt86Da
chr3R	19882950	19883353	19883110	27.8928	FBgn0040283	SMC1
chrX	1977678	1978026	1977851	91.1944	FBgn0040395	Unc-76
chr3R	20594284	20595124	20594447	42.6348	FBgn0040600	CG13631
chrX	20282752	20283014	20282876	46.0469	FBgn0040651	CG15458
chr2R	6980216	6980728	6980403	32.2503	FBgn0040765	luna
chrX	10159715	10160384	10159823	11.2493	FBgn0040942	CG12643
chr2L	9176058	9176490	9176227	71.6413	FBgn0041092	tai
chr3L	11245144	11245463	11245295	36.4209	FBgn0041094	scyl
chr2L	2886340	2887113	2886812	31.4148	FBgn0041111	lilli
chr2L	19548211	19548599	19548404	25.1644	FBgn0041180	TepIV
chrX	13178279	13178509	13178367	15.1138	FBgn0041210	HDAC4
chr3L	12508636	12509160	12508945	18.0572	FBgn0041775	tral
chr2L	19398896	19399163	19399012	53.7622	FBgn0041789	Pax
chr3R	6714403	6715306	6715153	62.1052	FBgn0042094	Adk3
chr2R	3610145	3610427	3610265	59.9874	FBgn0042135	CG18812
chrX	16043114	16043429	16043241	38.7306	FBgn0042650	disco-r
chr3R	13994269	13994564	13994415	48.8861	FBgn0042693	PP2A-B'
chr2R	17393458	17393627	17393531	17.4326	FBgn0043070	MESK2
chr2L	5907327	5907471	5907381	8.83696	FBgn0043362	bchs
chr2L	12404438	12404834	12404590	24.3432	FBgn0043841	vir-1
chr3R	3300400	3300610	3300485	9.87889	FBgn0043853	snoRNA:MeU5-C46
chrX	19577022	19577241	19577124	78.2931	FBgn0043903	dome
chr2R	7552809	7553405	7553119	68.248	FBgn0044020	Roc2
chrX	2230131	2230728	2230504	59.7808	FBgn0044047	Ilp6
chr3R	12278746	12278947	12278823	12.6342	FBgn0044826	Pak3
chr3R	21154319	21155317	21154476	43.3964	FBgn0045761	CHKov1
chr2L	15264447	15264881	15264693	34.9273	FBgn0045842	yuri
chr3R	16848539	16849592	16848834	40.9867	FBgn0046763	CG17278
chr2R	5749295	5749692	5749455	29.3875	FBgn0050010	CG30010
chr2R	6011298	6011845	6011684	33.6652	FBgn0050011	gem
chr2R	7552809	7553405	7553119	68.248	FBgn0050035	Tret1-1
chr2R	8476514	8477557	8477159	35.9618	FBgn0050055	CR30055
chr2R	11750194	11750788	11750526	11.9144	FBgn0050085	CG30085
chr2R	11622764	11623013	11622884	37.8687	FBgn0050089	CG30089
chr2R	14499128	14499484	14499309	41.7693	FBgn0050115	GEFmeso
chr2R	13279848	13280263	13280124	17.7149	FBgn0050232	tRNA:CR30232
chr2R	18003749	18004496	18003879	25.3818	FBgn0050280	CG30280
chr2R	18003749	18004496	18003879	25.3818	FBgn0050281	CG30281
chr2R	17600539	17601845	17600738	74.1325	FBgn0050403	CG30403
chr2R	12990300	12990486	12990403	28.8169	FBgn0050456	CG30456
chr2R	12578503	12578816	12578657	17.4706	FBgn0050463	CG30463
chr2R	9844775	9845870	9845694	25.3097	FBgn0050481	mRpL53
chr2R	3632543	3633223	3632847	23.8457	FBgn0050497	CG30497
chr3R	25040571	25041313	25040838	51.3643	FBgn0051044	CR31044
chr3R	23751226	23751382	23751273	23.1117	FBgn0051053	CG31053
chr3R	21566057	21566532	21566278	29.5551	FBgn0051092	LpR2
chr3R	21118591	21118873	21118722	13.6326	FBgn0051098	CG31098
chr3R	21118591	21118873	21118722	13.6326	FBgn0051102	CG31102
chr3R	20476769	20477254	20476989	47.54	FBgn0051125	CG31125
chr3R	19788537	19788853	19788663	16.1103	FBgn0051140	CG31140
chr3R	19747670	19748777	19747823	30.4567	FBgn0051141	CG31141
chr3R	19495045	19496072	19495814	50.1356	FBgn0051145	CG31145
chr3R	16739862	16740094	16739979	11.1631	FBgn0051191	CG31191
chr3R	14224795	14224943	14224825	13.7561	FBgn0051232	koko
chr3R	12028640	12029048	12028840	40.9037	FBgn0051287	CG31287
chr3R	8331270	8331734	8331498	45.7443	FBgn0051354	Hsp70Bbb
chr3R	7712807	7713047	7712924	79.2664	FBgn0051368	CG31368
chr3R	6177661	6177901	6177779	15.0229	FBgn0051406	CG31406
chr3R	17700843	17701020	17700898	42.8172	FBgn0051431	CG31431
chr3R	278972	279368	279122	70.1335	FBgn0051522	CG31522
chr2L	21423300	21424203	21423603	26.0122	FBgn0051611	His4:CG31611
chr2L	21423300	21424203	21423603	26.0122	FBgn0051613	His3:CG31613
chr2L	21423300	21424203	21423603	26.0122	FBgn0051617	His1:CG31617
chr2L	21423300	21424203	21423603	26.0122	FBgn0051618	His2A:CG31618
chr2L	21237702	21238006	21237821	31.842	FBgn0051626	CG31626
chr2L	2203213	2203603	2203373	15.6823	FBgn0051668	CG31668
chr2L	2242142	2242512	2242285	85.9798	FBgn0051682	Tengl1
chr2L	11528174	11528318	11528244	20.4533	FBgn0051706	CG31706
chr2L	18121425	18122169	18121985	23.3688	FBgn0051785	CG31785
chr2L	16544838	16544982	16544885	16.608	FBgn0051816	CG31816
chr2L	9237652	9237982	9237796	20.8203	FBgn0051885	tRNA:CR31885
chr3L	18833557	18833789	18833674	19.1889	FBgn0052027	CR32027
chr3L	12906991	12907217	12907081	27.3658	FBgn0052115	CG32115
chr3L	17733548	17733753	17733635	11.6707	FBgn0052183	Ccn
chr3L	19889456	19889871	19889579	21.9622	FBgn0052218	CR32218
chr3L	4854063	4854373	4854166	23.9802	FBgn0052237	CG32237
chr3L	4624481	4624848	4624639	22.884	FBgn0052246	CG32246
chr3L	4071648	4071980	4071809	42.1326	FBgn0052259	CG32259
chr3L	3765673	3766122	3765830	34.1118	FBgn0052264	CG32264
chr3L	2151523	2152250	2151787	53.37	FBgn0052311	zormin
chr3L	7860146	7860853	7860622	70.0368	FBgn0052365	CG32365
chr3L	7802653	7803307	7802963	35.8441	FBgn0052369	CG32369
chr3L	5177612	5178474	5178023	54.2313	FBgn0052423	shep
chr3L	881597	882304	882052	91.3275	FBgn0052479	CG32479
chr3L	769096	769560	769421	41.4766	FBgn0052480	tRNA:CR32480
chr3L	769096	769560	769421	41.4766	FBgn0052481	tRNA:CR32481
chr3L	3062751	3062973	3062859	7.42189	FBgn0052486	CG32486
chrX	20938430	20938785	20938581	27.379	FBgn0052512	CG32512
chrX	19780849	19781510	19781011	74.8206	FBgn0052529	Hers
chrX	18298528	18298896	18298685	43.2546	FBgn0052549	CG32549
chrX	14733895	14734402	14734041	19.679	FBgn0052590	CG32590
chrX	14937611	14938420	14937742	24.4925	FBgn0052594	be
chrX	13358340	13358639	13358488	12.0771	FBgn0052635	Neto
chrX	11048540	11049140	11049010	14.4266	FBgn0052668	CG32668
chrX	10661472	10661628	10661525	16.8452	FBgn0052672	Atg8a
chrX	10629774	10630075	10629962	21.6032	FBgn0052676	CG32676
chrX	4320759	4321231	4320956	36.7311	FBgn0052773	CG32773
chrX	1282128	1282848	1282266	50.0695	FBgn0052813	CG32813
chr3R	236802	237840	237302	61.3107	FBgn0052944	CG32944
chr2L	4997404	4998055	4997819	89.3202	FBgn0053113	Rtnl1
chr2R	9844775	9845870	9845694	25.3097	FBgn0053155	CG33155
chr3R	11490492	11490873	11490640	33.1768	FBgn0053207	pxb
chr3L	14751859	14753537	14753261	93.7582	FBgn0053260	CG33260
chr2R	11782823	11783178	11782976	22.6931	FBgn0053463	CG33463
chr2R	11704484	11704699	11704572	26.478	FBgn0053465	CG33465
chr2R	6308730	6309648	6309001	41.2426	FBgn0053474	CG33474
chr2L	868342	868490	868419	19.0974	FBgn0053526	PNUTS
chrX	18176471	18176680	18176538	32.6563	FBgn0053542	upd3
chr2L	160501	161178	160834	31.2053	FBgn0053635	CG33635
chr2L	15056999	15057285	15057127	23.5282	FBgn0053679	CG33679
chr2L	21423300	21424203	21423603	26.0122	FBgn0053727	snmRNA:430:CR33727
chr2L	21433391	21434074	21433699	20.54	FBgn0053728	snmRNA:430:CR33728
chr2L	21452666	21453035	21452872	18.7692	FBgn0053729	snmRNA:430:CR33729
chr2L	21457707	21458188	21457914	24.7416	FBgn0053730	snmRNA:430:CR33730
chr2L	21462260	21463300	21462951	22.0577	FBgn0053731	snmRNA:430:CR33731
chr2L	21467798	21468130	21468004	31.7616	FBgn0053732	snmRNA:430:CR33732
chr2L	21472335	21473417	21473040	22.3211	FBgn0053733	snmRNA:430:CR33733
chr2L	21477874	21478492	21478108	25.0646	FBgn0053734	snmRNA:430:CR33734
chr2L	21482775	21483199	21483013	18.0721	FBgn0053735	snmRNA:430:CR33735
chr2L	21487972	21488750	21488328	120.012	FBgn0053736	snmRNA:430:CR33736
chr2L	21493045	21493673	21493371	108.741	FBgn0053737	snmRNA:430:CR33737
chr2L	21498256	21498569	21498423	134.365	FBgn0053738	snmRNA:430:CR33738
chr2L	21503127	21503716	21503465	125.998	FBgn0053739	snmRNA:430:CR33739
chr2L	21508216	21508950	21508503	131.676	FBgn0053740	snmRNA:430:CR33740
chr2L	21513213	21513964	21513560	114.842	FBgn0053741	snmRNA:430:CR33741
chr2L	21532921	21533312	21533126	126.364	FBgn0053745	snmRNA:430:CR33745
chr2R	8883690	8884208	8883871	71.4922	FBgn0053798	CG33798
chr2L	21418377	21418923	21418726	29.405	FBgn0053801	His1:CG33801
chr2L	21418377	21418923	21418726	29.405	FBgn0053802	His-Psi:CR33802
chr2L	21418377	21418923	21418726	29.405	FBgn0053803	His3:CG33803
chr2L	21428337	21428740	21428613	15.4803	FBgn0053804	His1:CG33804
chr2L	21428337	21428740	21428613	15.4803	FBgn0053805	His-Psi:CR33805
chr2L	21428337	21428740	21428613	15.4803	FBgn0053806	His3:CG33806
chr2L	21433391	21434074	21433699	20.54	FBgn0053807	His1:CG33807
chr2L	21433391	21434074	21433699	20.54	FBgn0053808	His2A:CG33808
chr2L	21433391	21434074	21433699	20.54	FBgn0053809	His3:CG33809
chr2L	21438536	21438974	21438754	20.3991	FBgn0053810	His1:CG33810
chr2L	21438536	21438974	21438754	20.3991	FBgn0053811	His-Psi:CR33811
chr2L	21438536	21438974	21438754	20.3991	FBgn0053812	His3:CG33812
chr2L	21452666	21453035	21452872	18.7692	FBgn0053813	His1:CG33813
chr2L	21452666	21453035	21452872	18.7692	FBgn0053814	His2A:CG33814
chr2L	21452666	21453035	21452872	18.7692	FBgn0053815	His3:CG33815
chr2L	21457707	21458188	21457914	24.7416	FBgn0053816	His1:CG33816
chr2L	21457707	21458188	21457914	24.7416	FBgn0053817	His2A:CG33817
chr2L	21457707	21458188	21457914	24.7416	FBgn0053818	His3:CG33818
chr2L	21462260	21463300	21462951	22.0577	FBgn0053819	His1:CG33819
chr2L	21462260	21463300	21462951	22.0577	FBgn0053820	His2A:CG33820
chr2L	21462260	21463300	21462951	22.0577	FBgn0053821	His3:CG33821
chr2L	21467798	21468130	21468004	31.7616	FBgn0053822	His1:CG33822
chr2L	21467798	21468130	21468004	31.7616	FBgn0053823	His2A:CG33823
chr2L	21467798	21468130	21468004	31.7616	FBgn0053824	His3:CG33824
chr2L	21472335	21473417	21473040	22.3211	FBgn0053825	His1:CG33825
chr2L	21472335	21473417	21473040	22.3211	FBgn0053826	His2A:CG33826
chr2L	21472335	21473417	21473040	22.3211	FBgn0053827	His3:CG33827
chr2L	21477874	21478492	21478108	25.0646	FBgn0053828	His1:CG33828
chr2L	21477874	21478492	21478108	25.0646	FBgn0053829	His2A:CG33829
chr2L	21477874	21478492	21478108	25.0646	FBgn0053830	His3:CG33830
chr2L	21482775	21483199	21483013	18.0721	FBgn0053831	His1:CG33831
chr2L	21482775	21483199	21483013	18.0721	FBgn0053832	His2A:CG33832
chr2L	21482775	21483199	21483013	18.0721	FBgn0053833	His3:CG33833
chr2L	21487972	21488750	21488328	120.012	FBgn0053834	His1:CG33834
chr2L	21487972	21488750	21488328	120.012	FBgn0053835	His2A:CG33835
chr2L	21487972	21488750	21488328	120.012	FBgn0053836	His3:CG33836
chr2L	21493045	21493673	21493371	108.741	FBgn0053837	His1:CG33837
chr2L	21493045	21493673	21493371	108.741	FBgn0053838	His2A:CG33838
chr2L	21493045	21493673	21493371	108.741	FBgn0053839	His3:CG33839
chr2L	21498256	21498569	21498423	134.365	FBgn0053840	His1:CG33840
chr2L	21498256	21498569	21498423	134.365	FBgn0053841	His2A:CG33841
chr2L	21498256	21498569	21498423	134.365	FBgn0053842	His3:CG33842
chr2L	21503127	21503716	21503465	125.998	FBgn0053843	His1:CG33843
chr2L	21503127	21503716	21503465	125.998	FBgn0053844	His2A:CG33844
chr2L	21503127	21503716	21503465	125.998	FBgn0053845	His3:CG33845
chr2L	21508216	21508950	21508503	131.676	FBgn0053846	His1:CG33846
chr2L	21508216	21508950	21508503	131.676	FBgn0053847	His2A:CG33847
chr2L	21508216	21508950	21508503	131.676	FBgn0053848	His3:CG33848
chr2L	21513213	21513964	21513560	114.842	FBgn0053849	His1:CG33849
chr2L	21513213	21513964	21513560	114.842	FBgn0053850	His2A:CG33850
chr2L	21513213	21513964	21513560	114.842	FBgn0053851	His3:CG33851
chr2L	21532921	21533312	21533126	126.364	FBgn0053861	His1:CG33861
chr2L	21532921	21533312	21533126	126.364	FBgn0053862	His2A:CG33862
chr2L	21532921	21533312	21533126	126.364	FBgn0053863	His3:CG33863
chr2L	21532921	21533312	21533126	126.364	FBgn0053869	His4:CG33869
chr2L	21532921	21533312	21533126	126.364	FBgn0053870	His2B:CG33870
chr2L	21513213	21513964	21513560	114.842	FBgn0053877	His4:CG33877
chr2L	21513213	21513964	21513560	114.842	FBgn0053878	His2B:CG33878
chr2L	21508216	21508950	21508503	131.676	FBgn0053879	His4:CG33879
chr2L	21508216	21508950	21508503	131.676	FBgn0053880	His2B:CG33880
chr2L	21503127	21503716	21503465	125.998	FBgn0053881	His4:CG33881
chr2L	21503127	21503716	21503465	125.998	FBgn0053882	His2B:CG33882
chr2L	21498256	21498569	21498423	134.365	FBgn0053883	His4:CG33883
chr2L	21498256	21498569	21498423	134.365	FBgn0053884	His2B:CG33884
chr2L	21493045	21493673	21493371	108.741	FBgn0053885	His4:CG33885
chr2L	21493045	21493673	21493371	108.741	FBgn0053886	His2B:CG33886
chr2L	21487972	21488750	21488328	120.012	FBgn0053887	His4:CG33887
chr2L	21487972	21488750	21488328	120.012	FBgn0053888	His2B:CG33888
chr2L	21482775	21483199	21483013	18.0721	FBgn0053889	His4:CG33889
chr2L	21482775	21483199	21483013	18.0721	FBgn0053890	His2B:CG33890
chr2L	21477874	21478492	21478108	25.0646	FBgn0053891	His4:CG33891
chr2L	21477874	21478492	21478108	25.0646	FBgn0053892	His2B:CG33892
chr2L	21472335	21473417	21473040	22.3211	FBgn0053893	His4:CG33893
chr2L	21472335	21473417	21473040	22.3211	FBgn0053894	His2B:CG33894
chr2L	21467798	21468130	21468004	31.7616	FBgn0053895	His4:CG33895
chr2L	21467798	21468130	21468004	31.7616	FBgn0053896	His2B:CG33896
chr2L	21462260	21463300	21462951	22.0577	FBgn0053897	His4:CG33897
chr2L	21462260	21463300	21462951	22.0577	FBgn0053898	His2B:CG33898
chr2L	21457707	21458188	21457914	24.7416	FBgn0053899	His4:CG33899
chr2L	21457707	21458188	21457914	24.7416	FBgn0053900	His2B:CG33900
chr2L	21452666	21453035	21452872	18.7692	FBgn0053901	His4:CG33901
chr2L	21452666	21453035	21452872	18.7692	FBgn0053902	His2B:CG33902
chr2L	21438536	21438974	21438754	20.3991	FBgn0053903	His4:CG33903
chr2L	21438536	21438974	21438754	20.3991	FBgn0053904	His2B:CG33904
chr2L	21433391	21434074	21433699	20.54	FBgn0053905	His4:CG33905
chr2L	21433391	21434074	21433699	20.54	FBgn0053906	His2B:CG33906
chr2L	21428337	21428740	21428613	15.4803	FBgn0053907	His4:CG33907
chr2L	21428337	21428740	21428613	15.4803	FBgn0053908	His2B:CG33908
chr2L	21418377	21418923	21418726	29.405	FBgn0053909	His4:CG33909
chr2L	21418377	21418923	21418726	29.405	FBgn0053910	His2B:CG33910
chrX	12555612	12555781	12555666	9.33728	FBgn0053963	CR33963
chr3L	17850327	17850638	17850477	11.7233	FBgn0054002	CG34002
chrU	1096173	1097024	1096666	60.6449	FBgn0058196	Maf1
chrX	3705497	3705882	3705664	20.3392	FBgn0061173	fd3F
chr2L	21423300	21424203	21423603	26.0122	FBgn0061209	His2B:CG17949
chr3L	16696230	16696406	16696304	12.8993	FBgn0063485	Lasp
chr2R	14294286	14294469	14294372	18.3932	FBgn0063492	GstE8
chr2R	14294286	14294469	14294372	18.3932	FBgn0063493	GstE7
chr2R	14294286	14294469	14294372	18.3932	FBgn0063494	GstE6
chr2R	14294286	14294469	14294372	18.3932	FBgn0063495	GstE5
chr2R	14288043	14288291	14288128	22.2915	FBgn0063497	GstE3
chr2R	14288043	14288291	14288128	22.2915	FBgn0063498	GstE2
chr3R	11983642	11983874	11983759	54.0712	FBgn0063649	CG6006
chr3R	17700843	17701020	17700898	42.8172	FBgn0064912	CG31178
chr3R	3300400	3300610	3300485	9.87889	FBgn0065099	snRNA:7SK
chr3R	21566057	21566532	21566278	29.5551	FBgn0066101	LpR1
chr2L	72141	72686	72522	19.6716	FBgn0067779	dbr
chrX	20067528	20067675	20067585	19.2472	FBgn0067861	Sdic1
chr3R	26357981	26358349	26358137	23.5424	FBgn0082582	tmod
chr2R	7284912	7285068	7284949	24.3821	FBgn0082585	sprt
chr3R	23751226	23751382	23751273	23.1117	FBgn0082923	snoRNA:Or-aca3
chr3R	16400291	16400689	16400446	11.0518	FBgn0083039	snoRNA:Psi18S-301
chr2R	11704484	11704699	11704572	26.478	FBgn0083919	Zasp52
chr2L	21096650	21096889	21096768	19.0459	FBgn0083972	CG34136
chr3R	12589763	12590069	12589920	58.9362	FBgn0084245	tre-3
chr3R	12589763	12590069	12589920	58.9362	FBgn0084688	tre-2
chr3R	12589763	12590069	12589920	58.9362	FBgn0085056	tre-1
chr2L	12055853	12056330	12056022	53.7629	FBgn0085193	CG34164
chr2L	2196530	2197340	2197142	22.5	FBgn0085201	CG34172
chr3L	530860	531373	531156	39.671	FBgn0085298	CG34269
chr3R	12944665	12945028	12944889	63.3371	FBgn0085307	CG34278
chr2L	18565553	18565858	18565697	14.5907	FBgn0085370	Pde11
chr3R	23707983	23708360	23708107	10.3807	FBgn0085382	CG34353
chrX	13213632	13213948	13213779	24.4278	FBgn0085388	IP3K2
chr2R	17926926	17927324	17927030	10.8478	FBgn0085399	CG34370
chr2R	10195458	10195809	10195614	20.3986	FBgn0085408	Shroom
chr2L	12586909	12587251	12587091	79.6926	FBgn0085424	nub
chrX	10440675	10441063	10440869	40.2772	FBgn0085443	spri
chrX	9238783	9239111	9238920	17.7831	FBgn0085478	CG34449
chr2L	866961	867162	867076	17.1025	FBgn0086031	snoRNA:Me28S-U1230
chr3R	5178647	5179044	5178895	24.0261	FBgn0086053	snoRNA:Me18S-G1358a
chr3R	5178647	5179044	5178895	24.0261	FBgn0086054	snoRNA:Me18S-G1358b
chr3R	10195679	10196199	10196019	21.6084	FBgn0086058	snoRNA:Me18S-G1189
chr3L	17556721	17557242	17556896	93.0097	FBgn0086080	snoRNA:Me28S-A576
chr3L	17994693	17994874	17994739	13.0124	FBgn0086081	snoRNA:Me28S-A30
chr3R	9189919	9190365	9190115	35.0827	FBgn0086371	poly
chr3R	3012651	3013244	3012836	12.4505	FBgn0086372	lap
chr3L	17414458	17414799	17414638	42.6442	FBgn0086475	sec3
chr2R	2500450	2500812	2500698	21.8036	FBgn0086655	jing
chr2R	7480427	7481309	7480655	28.7083	FBgn0086658	snoRNA:Psi28S-1180
chr2R	12017423	12018091	12017752	76.2427	FBgn0086676	spin
chr3R	4484510	4484823	4484634	20.4275	FBgn0086679	p
chr3R	10475255	10475623	10475428	35.0243	FBgn0086686	l(3)L1231
chr3R	8268489	8268990	8268610	10.8159	FBgn0086687	desat1
chr3L	15072416	15072771	15072610	26.6222	FBgn0086690	cp309
chr2R	7502516	7502877	7502719	13.5551	FBgn0086712	Egm
chr2L	1649904	1650235	1650040	28.3449	FBgn0086758	chinmo
chrX	19780849	19781510	19781011	74.8206	FBgn0086782	amn
chrX	3634676	3635382	3634942	118.999	FBgn0086899	tlk
chr2L	221990	222444	222195	50.5542	FBgn0086902	kis
chr3R	3945459	3945877	3945713	54.1458	FBgn0243512	puc
chr2R	18003749	18004496	18003879	25.3818	FBgn0243516	Vrp1
chr3L	1794435	1794968	1794799	18.0882	FBgn0250789	alpha-Spec
chr2L	20987708	20988000	20987842	16.0185	FBgn0250867	CG42238
chr2L	2753007	2753325	2753172	84.7743	FBgn0250906	Pgk
chrX	12365488	12365715	12365595	14.001	FBgn0259143	CG42258
chrX	10219516	10219754	10219541	13.9245	FBgn0259170	alpha-Man-I
chr3L	14699632	14699934	14699734	21.8552	FBgn0259175	ome
chr2L	12461125	12461738	12461311	60.8168	FBgn0259176	bun
chr2L	1227206	1227533	1227419	22.6641	FBgn0259229	CG42329
chr3R	20596773	20597110	20596989	18.1702	FBgn0259233	CG42331
chr3L	15619167	15619475	15619256	8.6028	FBgn0259236	comm3
chrX	15985589	15985741	15985616	15.5213	FBgn0259699	CG42353
chrX	15985589	15985741	15985616	15.5213	FBgn0259700	CG42354
chr3R	14989593	14990671	14989842	89.4162	FBgn0259704	CG42358
chr3R	14989593	14990671	14989842	89.4162	FBgn0259705	CG42359
chrX	8936377	8936768	8936612	52.1208	FBgn0259734	CG42388
chr2L	16587843	16588777	16588111	69.8068	FBgn0259735	CG42389
chr2R	3376093	3376651	3376282	64.3397	FBgn0259745	wech
chr2L	11155563	11156071	11155799	55.6895	FBgn0259822	Ca-beta
chr3L	15981414	15981688	15981525	14.5938	FBgn0259824	Hip14
chr3L	7428038	7428575	7428417	23.5063	FBgn0259935	CG42458
chr3R	6212651	6213093	6212950	74.4402	FBgn0259938	cwo
chr2L	13572421	13572898	13572644	26.2229	FBgn0259984	kuz
chr3R	15289736	15290095	15289876	23.382	FBgn0260003	Dys
chr3L	14751859	14753537	14753261	93.7582	FBgn0260233	CG42507
chrX	416446	417653	417292	30.0287	FBgn0260400	elav
chr2R	11501212	11501417	11501335	18.7802	FBgn0260429	CG42524
chr3L	8539511	8539880	8539656	47.3535	FBgn0260442	rhea
chr3L	22720829	22721314	22721164	16.2429	FBgn0260481	CG32454
chr2L	17450224	17450753	17450459	35.4887	FBgn0260632	dl
chr3L	16045187	16046085	16045655	28.7484	FBgn0260635	th
chr3R	2826353	2826907	2826710	43.2335	FBgn0260642	Antp
chr3R	5376352	5377406	5376593	121.964	FBgn0260722	CR42549
chr3R	7818799	7819288	7819134	30.5904	FBgn0260745	mfas
chr3R	632227	632393	632256	22.6498	FBgn0260794	ctrip
chr2R	18457192	18457667	18457369	51.8575	FBgn0260866	dnr1
chr2R	15354572	15355939	15354797	44.4395	FBgn0260934	par-1
chr3L	5763946	5764164	5764025	28.1678	FBgn0260936	scny
chr3L	12784112	12784390	12784236	19.2983	FBgn0260945	Atg1
chrX	7840901	7841289	7841021	13.939	FBgn0260970	CG42593
chr3R	25581584	25581778	25581620	23.9763	FBgn0260990	yata
chr2L	5943733	5944032	5943852	46.4682	FBgn0261055	Sfp26Ad
chr3R	14742524	14743061	14742757	22.267	FBgn0261113	Xrp1
chr3R	2934030	2934432	2934206	44.617	FBgn0261238	Alh
chr2L	21250450	21251182	21250571	58.4884	FBgn0261239	Hr39
chr3L	21375062	21375769	21375482	26.5537	FBgn0261258	rgn
chr3L	8757808	8758200	8757945	12.6793	FBgn0261259	Fhos
chr2L	15264447	15264881	15264693	34.9273	FBgn0261268	Cul-3
chrX	11048540	11049140	11049010	14.4266	FBgn0261277	rtv
chr2L	16685187	16685404	16685284	39.8328	FBgn0261278	grp
chr3L	19784463	19785152	19784613	45.0989	FBgn0261283	HLH106
chr3L	19784463	19785152	19784613	45.0989	FBgn0261360	CG42637
chrX	5640789	5641449	5641043	184.748	FBgn0261383	IntS6
chr2R	16885509	16885816	16885673	57.6189	FBgn0261394	Pros29
chrX	1129024	1129406	1129140	40.5025	FBgn0261444	CG3638
chr3L	6956328	6956645	6956501	14.911	FBgn0261445	sgl
chrX	2439269	2439864	2439629	68.4271	FBgn0261451	trol
chrX	19047429	19048368	19047762	20.663	FBgn0261461	RhoGAP18B
chr3R	27573923	27574347	27574076	15.3886	FBgn0261479	nero
chr3R	3317230	3317458	3317336	30.287	FBgn0261508	CG42656
chr2R	8619583	8620415	8620094	34.5335	FBgn0261545	CG42663
chr3L	16962780	16963297	16962995	40.5223	FBgn0261547	Exn
chrX	1724664	1725390	1725284	17.978	FBgn0261548	CG42666
chrX	8923958	8924250	8924101	27.8194	FBgn0261549	rdgA
chr3R	16136877	16137398	16137156	18.5902	FBgn0261550	CG42668
chr3R	5253855	5254306	5254114	85.6186	FBgn0261552	ps
chr2L	3478064	3478607	3478364	36.5905	FBgn0261560	Thor
chr2R	14499128	14499484	14499309	41.7693	FBgn0261587	CG42697
chr2R	4214334	4215044	4214751	52.2866	FBgn0261588	pdm3
chr3L	2585887	2586104	2586003	25.9722	FBgn0261602	RpL8
chr2R	10345469	10345911	10345606	23.0469	FBgn0261613	Oaz
chr3R	24156492	24156726	24156577	32.0509	FBgn0261618	larp
chr2R	8566859	8567414	8567212	75.9247	FBgn0261625	CG42708
chr3L	616425	617275	616859	97.8372	FBgn0261636	CG42719
chr2R	13152478	13153211	13152974	27.8563	FBgn0261642	mbl
chr2L	11445690	11445945	11445807	26.2688	FBgn0261648	salm
chr3L	12784112	12784390	12784236	19.2983	FBgn0261674	CG42709
chr3L	19784463	19785152	19784613	45.0989	FBgn0261688	Gyc76C
chrX	15192634	15193106	15192775	22.5462	FBgn0261703	gce
chr3R	22061227	22061417	22061350	10.5064	FBgn0261708	CR42745
chr2L	12543079	12543566	12543342	47.2609	FBgn0261709	CR42746
chrX	8314598	8315569	8315334	77.6019	FBgn0261793	Trf2
chr2L	7809600	7809822	7809715	15.2278	FBgn0261800	LanB1
chrX	19744933	19745734	19745437	40.7783	FBgn0261811	pico
chr2L	12507603	12507967	12507726	27.2263	FBgn0261812	CG42754
chr2L	5107758	5108698	5108387	61.6372	FBgn0261836	Msp-300
chr2R	10852019	10852492	10852260	47.9081	FBgn0261854	aPKC
chr3R	10959322	10960336	10959778	52.4571	FBgn0261859	CG42788
chr2R	6365224	6365598	6365428	34.2848	FBgn0261862	whd
chrX	8087000	8087410	8087131	21.0053	FBgn0261873	sdt
chr3R	13542810	13543186	13542978	86.9031	FBgn0261885	osa
chr3R	6062181	6062342	6062257	17.3846	FBgn0261928	CG42795
chr2L	5461196	5461610	5461387	13.9972	FBgn0261963	mid
chr2R	9850034	9850331	9850207	13.5027	FBgn0261975	CG42806
chr3R	13542810	13543186	13542978	86.9031	FBgn0261987	Pxt
chr3R	11830599	11831206	11830817	32.0987	FBgn0262028	CR42839
chr3R	7472570	7472984	7472809	25.9626	FBgn0262081	Csk
chr2R	14577411	14577765	14577548	44.0083	FBgn0262102	CG42855
chr2R	14577411	14577765	14577548	44.0083	FBgn0262103	Sik3
chr2R	6315762	6316680	6315973	70.5345	FBgn0262114	RanBPM
chr3R	10547960	10548504	10548177	42.1687	FBgn0262127	kibra
chr3L	378056	378272	378137	21.1484	FBgn0262139	trh
chr3L	14031149	14031620	14031465	32.9442	FBgn0262145	CR42871
chr2R	5944149	5944369	5944229	39.7055	FBgn0262169	magu
chr3L	16993390	16993684	16993508	12.596	FBgn0262189	mir-2500
chr2L	12461125	12461738	12461311	60.8168	FBgn0262203	mir-967
chr3R	10954282	10954596	10954410	12.7973	FBgn0262315	mir-2493
chr2R	4331611	4332313	4332184	23.0041	FBgn0262316	mir-986
chr2L	12507603	12507967	12507726	27.2263	FBgn0262353	CG43051
chr3L	3249035	3250780	3250458	70.2876	FBgn0262368	mir-282
chr3R	5915019	5915348	5915156	59.5527	FBgn0262378	mir-317
chr3R	25040571	25041313	25040838	51.3643	FBgn0262404	mir-996
chr3R	25040571	25041313	25040838	51.3643	FBgn0262448	mir-279
chr3L	640380	640789	640547	60.4154	FBgn0262451	ban
chr3R	22624624	22624828	22624708	17.1733	FBgn0262473	Tl
chr3L	19889456	19889871	19889579	21.9622	FBgn0262519	Mi-2
chr3L	8074690	8075171	8075057	45.9862	FBgn0262579	Ect4
chr3R	16087275	16087899	16087568	79.63	FBgn0262582	cic
chr3R	4725216	4726222	4725517	68.7397	FBgn0262614	pyd
chrX	3266833	3267264	3267110	33.5138	FBgn0262656	dm
chrX	11711791	11711981	11711858	19.1916	FBgn0262684	CG43154
chr3L	15097470	15097712	15097552	55.065	FBgn0262707	CTPsyn
chr3L	12797542	12797723	12797604	15.2628	FBgn0262714	Sap130
chr3L	4624481	4624848	4624639	22.884	FBgn0262733	Src64B
chrX	10699232	10700301	10699797	39.477	FBgn0262735	Imp
chr2R	2519736	2520716	2519988	52.451	FBgn0262736	Vha16-1
chr3L	21872472	21872794	21872630	26.1589	FBgn0262737	mub
chrX	4218663	4219272	4218871	27.0072	FBgn0262738	norpA
chr2R	9844775	9845870	9845694	25.3097	FBgn0262739	AGO1
chr3L	21248703	21249184	21248865	13.7325	FBgn0262854	CG43218
chr3L	15525390	15525831	15525642	29.0204	FBgn0262893	CG43248
chr2R	20680718	20681443	20680997	81.0742	FBgn0262902	CR43257
chr3R	19016183	19016451	19016323	46.0135	FBgn0262975	cnc
chrX	8304406	8305078	8304602	60.6554	FBgn0262976	lawc
chrX	7603968	7604346	7604129	102.535	FBgn0262979	CG43287
chr3L	6177984	6178273	6178082	8.34718	FBgn0262985	CG43293
chr3L	626464	627308	627087	93.1011	FBgn0263039	CR43334
chr2R	3510467	3510812	3510627	26.1768	FBgn0263077	CG43340
chr3R	5754095	5754764	5754402	70.6002	FBgn0263097	Glut4EF
chr2R	6451819	6452635	6451962	48.66	FBgn0263102	psq
chrX	13783451	13784108	13783587	15.9871	FBgn0263115	mamo
chr2R	4555134	4555300	4555209	15.0086	FBgn0263120	Acsl
chr2R	2123232	2123858	2123606	106.594	FBgn0263144	bin3
chr3R	4484510	4484823	4484634	20.4275	FBgn0263231	bel
chr2R	3376093	3376651	3376282	64.3397	FBgn0263240	Coop
chr3L	3249035	3250780	3250458	70.2876	FBgn0263246	CG43389
chrX	15307787	15308572	15308198	59.9662	FBgn0263257	cngl
chr3R	22361378	22361554	22361476	18.1488	FBgn0263289	scrib
chr3R	7394696	7395065	7394855	74.9039	FBgn0263316	Mrp4
chr2L	1426378	1427312	1427114	29.3851	FBgn0263320	CG43401
chr3L	640380	640789	640547	60.4154	FBgn0263342	CR43423
chr4	445278	445820	445432	46.307	FBgn0263385	CR43437
chr3L	2820647	2821618	2821203	117.369	FBgn0263392	CG43444
chr2R	15079269	15079587	15079331	14.8795	FBgn0263395	hppy
chr3R	9470615	9470969	9470741	32.7533	FBgn0263396	sqd
chr3R	5919049	5919588	5919386	66.5522	FBgn0263413	CR43459
chr3R	18452347	18453334	18452745	41.8854	FBgn0263451	CR43474
chr3R	18452347	18453334	18452745	41.8854	FBgn0263452	CR43475
chr2L	12507603	12507967	12507726	27.2263	FBgn0263458	snoRNA:CG43051-a
chr3R	16739862	16740094	16739979	11.1631	FBgn0263460	snoRNA:CG31191-a
chr2R	6422068	6423048	6422597	101.373	FBgn0263466	snoRNA:lola-a
chr2R	6422068	6423048	6422597	101.373	FBgn0263481	snoRNA:lola-b
chr2R	6422068	6423048	6422597	101.373	FBgn0263482	snoRNA:lola-c
chr2R	6422068	6423048	6422597	101.373	FBgn0263483	snoRNA:lola-d
chr3R	20412217	20412538	20412381	39.9253	FBgn0263490	mld
chrX	5487836	5488319	5488074	30.2647	FBgn0263511	Vsx1
chrX	5454556	5454976	5454681	44.1936	FBgn0263512	Vsx2
chrX	2439269	2439864	2439629	68.4271	FBgn0263531	mir-4955
chrX	3669863	3671724	3671421	64.0539	FBgn0263532	mir-4962
chr2R	9894196	9895024	9894364	53.5838	FBgn0263539	mir-4978
chr2R	20181485	20181688	20181576	26.6079	FBgn0263546	mir-4985
chr2R	4039580	4039973	4039729	21.7512	FBgn0263593	Lpin
chr3R	12724768	12725061	12724924	15.4851	FBgn0263595	CR43617
chr2L	12974954	12975190	12975057	14.0999	FBgn0263598	Vha68-2
chr3L	15981414	15981688	15981525	14.5938	FBgn0263600	DNApol-delta
chr3R	12695088	12695416	12695245	22.3774	FBgn0263610	msa
chr3L	3249035	3250780	3250458	70.2876	FBgn0263617	CR43626
chr3R	278972	279368	279122	70.1335	FBgn0263620	CR43629
chr3R	21846340	21846917	21846739	51.1962	FBgn0263652	CR43643
chr3R	21847316	21847664	21847442	52.8556	FBgn0263653	CR43644
chr3R	5178647	5179044	5178895	24.0261	FBgn0263749	CG43674
chr2R	14288043	14288291	14288128	22.2915	FBgn0263770	CR43687
chr2R	14288043	14288291	14288128	22.2915	FBgn0263771	CR43688
chr2L	3771588	3771790	3771664	21.8266	FBgn0263843	CR43704
chr2R	12915811	12916009	12915903	29.6835	FBgn0263864	Ark
chrX	12629134	12629665	12629329	41.2347	FBgn0263865	Smr
chr3R	10574668	10575564	10575097	48.8476	FBgn0263929	jvl
chr3L	8838142	8838555	8838367	20.9093	FBgn0263930	dally
chrX	6762072	6762513	6762227	31.3868	FBgn0263993	CG43736
chr3R	13769429	13770003	13769696	90.4506	FBgn0263995	cpo
chrX	14733895	14734402	14734041	19.679	FBgn0264078	Flo-2
chr2R	11782823	11783178	11782976	22.6931	FBgn0264089	sli
chr3R	24687009	24687302	24687165	22.9958	FBgn0264324	spg
chr3R	19171792	19172448	19171954	57.4842	FBgn0264326	DNApol-epsilon
chr2R	20518396	20518705	20518545	24.292	FBgn0264328	CR43787
chr2L	5907327	5907471	5907381	8.83696	FBgn0264352	CR43808
chr3R	17030353	17030830	17030540	25.8347	FBgn0264357	SNF4Agamma
chrX	8936377	8936768	8936612	52.1208	FBgn0264384	CR43836
chrX	6892411	6892931	6892629	32.4381	FBgn0264385	CR43837
chr2L	7422425	7422768	7422606	26.9508	FBgn0264439	CR43857
chr3R	17867384	17868623	17867827	23.3762	FBgn0264491	how
chr3R	9843391	9843709	9843551	28.5941	FBgn0264493	rdx
chr2L	1737330	1737490	1737401	23.3312	FBgn0264494	CG17646
chr3R	2234826	2235303	2235069	20.8747	FBgn0264495	gpp
chr2R	8148744	8149247	8148957	21.0218	FBgn0264501	CR43900
chr2R	7502516	7502877	7502719	13.5551	FBgn0264508	CR43907
chr2L	3478064	3478607	3478364	36.5905	FBgn0264549	CR43928
chrX	1842114	1842450	1842234	33.3385	FBgn0264562	Hr4
chr3L	20723298	20723851	20723569	56.5671	FBgn0264573	CR43945
chr3L	16045187	16046085	16045655	28.7484	FBgn0264602	CR43951
chr3L	16696230	16696406	16696304	12.8993	FBgn0264605	CG43954
chr4	577846	578078	577966	49.9915	FBgn0264618	CR43958
chr3L	15101146	15101885	15101300	49.6368	FBgn0264702	CR43971
chr3L	8074690	8075171	8075057	45.9862	FBgn0264705	CR43974
chrX	5795674	5796146	5795868	19.6371	FBgn0000042	Act5C
chr2L	2162083	2163665	2162493	54.2809	FBgn0000097	aop
chr2L	2178612	2178992	2178769	22.751	FBgn0000097	aop
chr2L	2164479	2164893	2164680	22.377	FBgn0000097	aop
chr2L	2178021	2178177	2178101	14.7791	FBgn0000097	aop
chrX	4319034	4319427	4319190	25.6983	FBgn0000179	bi
chrX	4305447	4305778	4305617	22.5589	FBgn0000179	bi
chrX	1515740	1516462	1516084	16.0286	FBgn0000210	br
chr3R	5360368	5360620	5360500	50.2279	FBgn0000244	by
chr2R	8146689	8146990	8146861	18.9837	FBgn0000253	Cam
chr2L	3896536	3896817	3896661	9.96513	FBgn0000256	capu
chr2L	5977420	5977968	5977682	12.0581	FBgn0000308	chic
chr2R	6098867	6099113	6098980	18.0777	FBgn0000448	Hr46
chr2R	2007930	2008254	2008055	37.493	FBgn0000546	EcR
chr2R	2028853	2029381	2028981	31.4327	FBgn0000546	EcR
chr2R	2026197	2026385	2026287	16.2942	FBgn0000546	EcR
chr2R	2055847	2055997	2055962	10.6593	FBgn0000546	EcR
chr2R	2032897	2033262	2033015	10.6579	FBgn0000546	EcR
chr3L	15503991	15504231	15504069	35.515	FBgn0000565	Eip71CD
chr3L	17583448	17584303	17583910	92.3474	FBgn0000567	Eip74EF
chr3L	17570504	17571578	17570898	85.7918	FBgn0000567	Eip74EF
chr3L	17563002	17563653	17563228	62.6366	FBgn0000567	Eip74EF
chr3L	17572784	17573117	17572907	49.7764	FBgn0000567	Eip74EF
chr3L	17569393	17570101	17569868	40.6565	FBgn0000567	Eip74EF
chr3L	17612398	17612642	17612462	38.5472	FBgn0000567	Eip74EF
chr3L	17599922	17600249	17600018	28.2636	FBgn0000567	Eip74EF
chr3L	17609822	17610463	17610187	23.0615	FBgn0000567	Eip74EF
chr3L	17573355	17573590	17573422	12.3894	FBgn0000567	Eip74EF
chr3L	18056340	18056638	18056493	29.7011	FBgn0000568	Eip75B
chr3L	18022573	18022976	18022735	27.3188	FBgn0000568	Eip75B
chr3L	17954724	17955671	17955398	25.9081	FBgn0000568	Eip75B
chr3L	17965556	17965888	17965660	20.9688	FBgn0000568	Eip75B
chr3L	17992484	17992772	17992629	20.3225	FBgn0000568	Eip75B
chr3L	17994693	17994874	17994739	13.0124	FBgn0000568	Eip75B
chr3L	17996303	17996608	17996448	12.2082	FBgn0000568	Eip75B
chr2R	7416985	7417277	7417126	26.8518	FBgn0000577	en
chrX	4052048	4052264	4052139	11.3303	FBgn0000635	Fas2
chr2L	3657405	3657707	3657547	6.78073	FBgn0000721	for
chr3L	18758784	18759202	18758928	49.4809	FBgn0001078	ftz-f1
chr3L	18764162	18765079	18764669	38.5716	FBgn0001078	ftz-f1
chr3L	14265842	14266256	14266013	32.214	FBgn0001085	fz
chr3R	8196254	8196838	8196621	12.8522	FBgn0001149	GstD1
chr3R	6447964	6448165	6448048	29.1321	FBgn0001235	hth
chr3R	6361513	6361763	6361623	21.6387	FBgn0001235	hth
chr3R	3852795	3853002	3852897	19.1166	FBgn0001255	ImpE3
chr3L	4227186	4227553	4227352	18.4876	FBgn0001257	ImpL2
chr3L	4235080	4235398	4235170	15.9883	FBgn0001257	ImpL2
chr3R	25598447	25598885	25598585	94.682	FBgn0001297	kay
chr3R	25612097	25612340	25612215	25.2099	FBgn0001297	kay
chr3R	25591034	25591804	25591650	21.858	FBgn0001297	kay
chr3R	25589938	25590706	25590402	18.6695	FBgn0001297	kay
chr3L	516883	517168	517089	7.92084	FBgn0001316	klar
chr2L	16269274	16269966	16269547	62.9073	FBgn0001994	crp
chr2L	16286463	16287929	16286739	43.3028	FBgn0001994	crp
chr2L	16268013	16268503	16268162	30.889	FBgn0001994	crp
chr2L	16271414	16271734	16271574	15.2886	FBgn0001994	crp
chr3L	6209538	6209896	6209649	12.1404	FBgn0002526	LanA
chr3R	21846340	21846917	21846739	51.1962	FBgn0002609	HLHm3
chr2R	9912188	9912418	9912302	48.8201	FBgn0002643	mam
chr2R	9895671	9896991	9895916	48.744	FBgn0002643	mam
chr2R	9888254	9888639	9888459	23.9881	FBgn0002643	mam
chr2R	9879230	9879528	9879343	18.8822	FBgn0002643	mam
chr2R	9883192	9883365	9883253	18.4404	FBgn0002643	mam
chr3R	16783300	16783700	16783442	27.3609	FBgn0002921	Atpalpha
chr2L	9448512	9448735	9448628	10.845	FBgn0002973	numb
chrX	2230131	2230728	2230504	59.7808	FBgn0003079	phl
chrX	2194892	2195791	2195173	49.5337	FBgn0003079	phl
chrX	2199792	2201009	2199986	45.5395	FBgn0003079	phl
chrX	2190512	2190686	2190607	20.9575	FBgn0003079	phl
chrX	2188553	2188833	2188711	16.1374	FBgn0003079	phl
chr3R	19152074	19152923	19152461	68.6756	FBgn0003118	pnt
chr3R	19121027	19121378	19121200	58.0911	FBgn0003118	pnt
chr3R	19171792	19172448	19171954	57.4842	FBgn0003118	pnt
chr3R	19139950	19140446	19140161	50.4219	FBgn0003118	pnt
chr3R	19118691	19119390	19119062	24.5659	FBgn0003118	pnt
chr3L	1368361	1368667	1368504	14.4418	FBgn0003138	Ptp61F
chr3R	5061500	5062286	5062072	34.8662	FBgn0003165	pum
chr3R	4983643	4984039	4983929	28.8031	FBgn0003165	pum
chr3R	5050677	5050959	5050831	16.8844	FBgn0003165	pum
chr3R	5055813	5056077	5055919	11.3697	FBgn0003165	pum
chr2L	8735546	8735976	8735783	32.7253	FBgn0003209	raw
chr2L	8739995	8740427	8740303	12.785	FBgn0003209	raw
chrX	15707342	15707689	15707491	32.434	FBgn0003345	sd
chrX	10679207	10679486	10679328	23.5373	FBgn0003360	sesB
chrX	2540086	2540334	2540192	17.6359	FBgn0003371	sgg
chr2R	7060989	7061361	7061144	47.3053	FBgn0003396	shn
chr2R	7072993	7073643	7073296	31.8344	FBgn0003396	shn
chr2R	7084799	7085018	7084902	31.5135	FBgn0003396	shn
chr2R	7091929	7092699	7092074	19.0543	FBgn0003396	shn
chr2R	7062823	7063669	7063548	13.878	FBgn0003396	shn
chr3L	21002013	21002326	21002125	41.2549	FBgn0003415	skd
chr3L	21016520	21016860	21016625	31.7749	FBgn0003415	skd
chr3L	21004105	21004423	21004272	30.3195	FBgn0003415	skd
chr3R	11809797	11811023	11810522	52.7252	FBgn0003507	srp
chr3R	11830599	11831206	11830817	32.0987	FBgn0003507	srp
chr3R	25082749	25083258	25082889	16.9313	FBgn0003525	stg
chr3R	8104746	8104979	8104871	15.7592	FBgn0003651	svp
chr3R	11117196	11117655	11117399	39.844	FBgn0003721	Tm1
chr2R	16964227	16964561	16964377	25.7387	FBgn0003748	Treh
chr3R	10104424	10104722	10104569	32.4096	FBgn0003862	trx
chr3R	10109139	10109333	10109236	23.3132	FBgn0003862	trx
chr3R	10110863	10111174	10111011	16.8497	FBgn0003862	trx
chr2R	4535093	4535636	4535173	32.4509	FBgn0003892	ptc
chr2R	4541094	4541540	4541230	24.8068	FBgn0003892	ptc
chr2R	4553336	4553846	4553591	14.2432	FBgn0003892	ptc
chr2L	484552	485098	484784	42.078	FBgn0003963	ush
chr2L	521667	522484	522276	39.576	FBgn0003963	ush
chr2L	524583	524925	524685	31.6264	FBgn0003963	ush
chr2L	523044	523934	523634	25.6234	FBgn0003963	ush
chr2L	497911	498083	497957	9.8038	FBgn0003963	ush
chr3R	26589964	26590293	26590133	18.1875	FBgn0004606	zfh1
chr3R	26601248	26601453	26601327	15.6772	FBgn0004606	zfh1
chr4	525731	526484	525987	49.8109	FBgn0004607	zfh2
chr4	523298	523651	523532	33.1927	FBgn0004607	zfh2
chr3R	14273026	14273381	14273297	46.5927	FBgn0004652	fru
chr3R	14275980	14276376	14276232	41.4972	FBgn0004652	fru
chr3R	14306371	14306790	14306552	33.5147	FBgn0004652	fru
chr3R	14274467	14274902	14274599	19.7384	FBgn0004652	fru
chrX	7951870	7952183	7951993	72.0956	FBgn0004656	fs(1)h
chrX	7957125	7957503	7957275	12.996	FBgn0004656	fs(1)h
chrX	7957125	7957503	7957275	12.996	FBgn0004657	mys
chrX	2018287	2018748	2018461	39.8327	FBgn0004860	ph-d
chrX	2018287	2018748	2018461	39.8327	FBgn0004861	ph-p
chr3L	21248703	21249184	21248865	13.7325	FBgn0004865	Eip78C
chr3L	1102266	1102713	1102443	36.3978	FBgn0004870	bab1
chr3L	1096717	1097028	1096871	26.1209	FBgn0004870	bab1
chr2L	3779506	3779660	3779565	15.4023	FBgn0004893	bowl
chr2R	5988348	5988517	5988419	22.9967	FBgn0004907	14-3-3zeta
chr2L	8691636	8691897	8691762	33.0223	FBgn0004914	Hnf4
chr3L	16045187	16046085	16045655	28.7484	FBgn0005536	Mbs
chr3L	16054238	16054794	16054445	19.9275	FBgn0005536	Mbs
chr2R	6427948	6428352	6428116	51.4802	FBgn0005630	lola
chr2R	6428867	6430126	6429182	48.037	FBgn0005630	lola
chr2R	6430609	6431094	6430891	28.1895	FBgn0005630	lola
chr2R	6421575	6421971	6421823	23.1128	FBgn0005630	lola
chr3L	3544988	3545395	3545141	23.2571	FBgn0005640	Eip63E
chr3L	3542446	3543121	3542693	22.2326	FBgn0005640	Eip63E
chr3R	8196254	8196838	8196621	12.8522	FBgn0010038	GstD2
chr3R	8196254	8196838	8196621	12.8522	FBgn0010039	GstD3
chr3R	26163797	26164104	26163960	12.4058	FBgn0010113	hdc
chr2R	12987576	12987748	12987625	10.6173	FBgn0010226	GstS1
chr2R	17593441	17593793	17593599	22.5868	FBgn0010228	HmgZ
chr2R	8340634	8340972	8340833	25.6607	FBgn0010238	Lac
chr2L	19140724	19141804	19141505	25.8717	FBgn0010300	brat
chr2L	19158012	19158393	19158336	22.4051	FBgn0010300	brat
chr3R	913618	913915	913765	25.6878	FBgn0010313	corto
chr3R	12032724	12033001	12032859	17.7618	FBgn0010438	mtSSB
chr2R	14192275	14192801	14192437	63.8829	FBgn0010575	sbb
chr2R	14176172	14176521	14176315	31.7293	FBgn0010575	sbb
chr2R	14230259	14230896	14230398	19.2519	FBgn0010575	sbb
chr2R	14687920	14688204	14688036	19.6254	FBgn0010651	l(2)08717
chr2R	14690747	14691116	14690980	17.9657	FBgn0010651	l(2)08717
chr3L	10674012	10674369	10674162	44.4143	FBgn0010762	simj
chr3R	14991249	14991772	14991519	61.6522	FBgn0010768	sqz
chr3L	9118417	9118790	9118487	12.8533	FBgn0011206	bol
chr3R	10556515	10556682	10556599	14.1536	FBgn0011217	eff
chr3R	10563654	10564054	10563786	10.0714	FBgn0011217	eff
chr2L	17429807	17430019	17429919	15.3391	FBgn0011274	Dif
chr3R	14024086	14025148	14024627	55.5308	FBgn0011481	Ssdp
chr2R	5817063	5817639	5817326	34.763	FBgn0011656	Mef2
chrX	8787843	8788980	8788144	27.8492	FBgn0011661	Moe
chr3R	21343713	21344260	21343942	75.7489	FBgn0011666	msi
chr3R	21354411	21354581	21354465	11.8039	FBgn0011666	msi
chr3R	16884439	16884829	16884648	10.8994	FBgn0011672	Mvl
chrX	16226634	16226926	16226767	15.0575	FBgn0011764	Dsp1
chr3R	17478495	17478858	17478671	36.7352	FBgn0011766	E2f
chr3R	17477111	17477860	17477289	34.5723	FBgn0011766	E2f
chrX	12555612	12555781	12555666	9.33728	FBgn0011837	Tis11
chr3L	14750127	14751463	14750484	63.0232	FBgn0013263	Trl
chr3R	7782322	7782480	7782403	14.5182	FBgn0013275	Hsp70Aa
chr3R	7782322	7782480	7782403	14.5182	FBgn0013276	Hsp70Ab
chr3R	8334531	8334857	8334728	41.1926	FBgn0013278	Hsp70Bb
chr3L	11002198	11002578	11002332	21.3608	FBgn0013469	klu
chr2R	9785011	9785513	9785252	70.2673	FBgn0013733	shot
chr2R	9818136	9818367	9818214	11.6576	FBgn0013733	shot
chr3R	17431016	17431710	17431543	23.6408	FBgn0013984	InR
chr3R	17440709	17441319	17440930	12.3019	FBgn0013984	InR
chr3R	17439114	17439453	17439200	7.41661	FBgn0013984	InR
chr3L	19890570	19890783	19890679	21.4617	FBgn0014037	Su(Tpl)
chr3L	19896537	19896744	19896623	11.2479	FBgn0014037	Su(Tpl)
chrX	11575866	11576102	11575954	13.6522	FBgn0014133	bif
chr3L	9394172	9394450	9394315	16.0846	FBgn0015218	eIF-4E
chr3R	26214300	26214576	26214439	29.4259	FBgn0015221	Fer2LCH
chr3R	26214300	26214576	26214439	29.4259	FBgn0015222	Fer1HCH
chr3R	17681913	17682128	17682016	19.396	FBgn0015229	glec
chrX	3614462	3614657	3614547	22.9366	FBgn0015286	Rala
chr2R	11017161	11017587	11017306	31.3528	FBgn0015371	chn
chr2R	11024871	11025404	11025196	23.6939	FBgn0015371	chn
chr2R	11008073	11008407	11008228	9.52447	FBgn0015371	chn
chr3R	6177661	6177901	6177779	15.0229	FBgn0015396	jumu
chr2L	6792048	6792287	6792143	25.7683	FBgn0015777	nrv2
chr3L	7802653	7803307	7802963	35.8441	FBgn0016694	Pdp1
chr3L	19164781	19164986	19164889	15.596	FBgn0016797	fz2
chr2R	18573254	18573844	18573688	28.1147	FBgn0020257	ppa
chr3R	18451801	18452002	18451903	12.7425	FBgn0020278	loco
chr2L	841630	842191	841723	11.0182	FBgn0020304	drongo
chr2L	866961	867162	867076	17.1025	FBgn0020305	dbe
chr2R	18129449	18129918	18129695	62.4373	FBgn0020307	dve
chr2R	18130326	18130838	18130677	27.231	FBgn0020307	dve
chr2R	18131203	18131443	18131273	21.3541	FBgn0020307	dve
chr3L	128437	128730	128502	20.4447	FBgn0020386	Pdk1
chrX	12650353	12650683	12650485	17.5375	FBgn0020513	ade5
chr3R	19840014	19840417	19840209	27.8238	FBgn0020647	KrT95D
chr3L	16799408	16799956	16799736	23.5225	FBgn0021768	nudC
chr3R	11799409	11799800	11799488	40.0322	FBgn0022787	Hel89B
chr3R	14411170	14411592	14411321	30.6262	FBgn0023083	fray
chr3L	13248197	13248564	13248341	17.5915	FBgn0023095	caps
chrX	3572180	3572719	3572373	67.3954	FBgn0023215	Mnt
chrX	3589449	3589906	3589645	59.8608	FBgn0023215	Mnt
chrX	3581945	3583556	3583294	47.6539	FBgn0023215	Mnt
chrX	3581010	3581589	3581325	46.4199	FBgn0023215	Mnt
chrX	3566170	3566678	3566310	42.0096	FBgn0023215	Mnt
chrX	3573886	3574375	3574150	19.9202	FBgn0023215	Mnt
chr2L	13513999	13515018	13514237	46.866	FBgn0023407	B4
chr2L	13511430	13511703	13511521	13.5627	FBgn0023407	B4
chrX	2188553	2188833	2188711	16.1374	FBgn0023526	CG2865
chrX	17194471	17194786	17194668	17.0333	FBgn0024238	Fim
chr2L	19354549	19354902	19354686	20.1282	FBgn0024245	dnt
chr2L	19347649	19347878	19347699	13.1852	FBgn0024245	dnt
chrX	7200530	7201015	7200705	46.3034	FBgn0024250	brk
chr3L	1006251	1006641	1006374	17.209	FBgn0024277	trio
chr3R	10195679	10196199	10196019	21.6084	FBgn0024321	NK7.1
chr3R	14568535	14568691	14568575	17.7623	FBgn0024329	Mekk1
chrX	10679207	10679486	10679328	23.5373	FBgn0025111	Ant2
chr3L	1178124	1178373	1178254	34.739	FBgn0025525	bab2
chr2L	131740	132191	131966	39.0321	FBgn0025683	CG3164
chr2R	1660543	1660836	1660687	32.0151	FBgn0025693	CG11163
chr3R	16885567	16886799	16886499	15.7371	FBgn0025865	Cortactin
chr2R	2518975	2519197	2519068	31.2817	FBgn0026761	Trap1
chrX	7838886	7839283	7839154	12.3479	FBgn0027280	l(1)G0193
chr3L	22817515	22818418	22818070	104.429	FBgn0027339	jim
chr3L	22795073	22795262	22795128	20.1619	FBgn0027339	jim
chrX	5894835	5895003	5894884	23.3613	FBgn0027546	CG4766
chr2R	5748087	5748427	5748214	21.5386	FBgn0027580	CG1516
chr3R	9190548	9190967	9190725	26.1144	FBgn0027610	Dic1
chr2L	8423578	8423824	8423690	10.8025	FBgn0027932	Akap200
chr3L	19287893	19288185	19288039	9.78554	FBgn0028380	fal
chr2R	13606670	13607180	13606903	25.499	FBgn0028494	CG6424
chrX	1169177	1169425	1169301	25.6616	FBgn0028550	Atf3
chr2R	13686025	13686236	13686101	9.40242	FBgn0028743	CG5036
chr2R	5326684	5326952	5326814	10.8889	FBgn0029092	ced-6
chr2L	866961	867162	867076	17.1025	FBgn0029095	aru
chrX	7590665	7591049	7590850	121.443	FBgn0029504	CHES-1-like
chrX	7603968	7604346	7604129	102.535	FBgn0029504	CHES-1-like
chrX	7598271	7601522	7599328	64.3173	FBgn0029504	CHES-1-like
chrX	7592073	7593030	7592800	35.8494	FBgn0029504	CHES-1-like
chrX	7588973	7589285	7589134	33.2637	FBgn0029504	CHES-1-like
chrX	7597441	7597784	7597608	24.4967	FBgn0029504	CHES-1-like
chrX	5639576	5639905	5639701	14.1634	FBgn0029798	CG4078
chrX	7201364	7202129	7201705	55.3461	FBgn0029941	CG1677
chrX	7200530	7201015	7200705	46.3034	FBgn0029941	CG1677
chrX	10661472	10661628	10661525	16.8452	FBgn0030228	CG1826
chrX	13528523	13529087	13528664	15.3743	FBgn0030505	NFAT
chrX	14917884	14918075	14917962	19.8846	FBgn0030600	hiw
chrX	16226634	16226926	16226767	15.0575	FBgn0030743	CG9921
chrX	16730186	16730349	16730279	15.463	FBgn0030797	CG13004
chrX	20527320	20527611	20527454	27.0326	FBgn0031126	Cyp6v1
chrX	20938430	20938785	20938581	27.379	FBgn0031150	bves
chrX	20939262	20939584	20939369	22.5966	FBgn0031150	bves
chr2L	131740	132191	131966	39.0321	FBgn0031228	CG11455
chr2L	2755166	2755605	2755414	49.6047	FBgn0031453	CG9894
chr2L	3303126	3303279	3303160	8.85658	FBgn0031516	CG9663
chr2L	3303126	3303279	3303160	8.85658	FBgn0031518	CG3277
chr2L	11066229	11067271	11067065	29.5211	FBgn0032330	Samuel
chr2L	11053390	11053719	11053549	9.99813	FBgn0032330	Samuel
chr2L	16520198	16520383	16520282	30.9468	FBgn0032587	CG5953
chr2L	16520655	16521017	16520819	20.7462	FBgn0032587	CG5953
chr2L	16534124	16534499	16534269	17.8454	FBgn0032587	CG5953
chr2L	19398400	19398571	19398452	29.8415	FBgn0032775	CG17544
chr2L	21354596	21354961	21354763	16.3984	FBgn0032943	Tsp39D
chr2R	3265690	3266272	3265839	21.5783	FBgn0033159	Dscam
chr2R	5988348	5988517	5988419	22.9967	FBgn0033485	RpLP0-like
chr2R	7254126	7254441	7254295	20.0403	FBgn0033627	CG13204
chr2R	7488872	7489517	7489201	56.894	FBgn0033636	tou
chr2R	7490665	7491289	7490900	47.393	FBgn0033636	tou
chr2R	7480427	7481309	7480655	28.7083	FBgn0033636	tou
chr2R	7502516	7502877	7502719	13.5551	FBgn0033636	tou
chr2R	7513945	7514277	7514078	36.6007	FBgn0033638	CG9005
chr2R	7519213	7519371	7519260	11.5189	FBgn0033638	CG9005
chr2R	8340634	8340972	8340833	25.6607	FBgn0033739	Dyb
chr2R	14542627	14542965	14542744	8.31691	FBgn0034371	SP2637
chr2R	16887652	16887933	16887717	29.2165	FBgn0034570	CG10543
chr2R	19546560	19547085	19546690	100.161	FBgn0034886	Pde8
chr2R	20439982	20440586	20440377	18.4413	FBgn0035021	CG4622
chr2R	20439982	20440586	20440377	18.4413	FBgn0035023	itp
chr3L	544128	544503	544236	47.8031	FBgn0035140	CG17180
chr3L	544128	544503	544236	47.8031	FBgn0035141	Cypl
chr3L	542857	543778	543405	47.9825	FBgn0035142	hipk
chr3L	544128	544503	544236	47.8031	FBgn0035142	hipk
chr3L	545799	546227	546030	37.3196	FBgn0035142	hipk
chr3L	647227	647508	647352	22.2101	FBgn0035147	Gale
chr3L	880902	881346	881090	47.2574	FBgn0035173	CG13907
chr3L	2493499	2494068	2493650	14.8061	FBgn0035346	CG1146
chr3L	2478452	2478801	2478583	20.0739	FBgn0035347	CG33232
chr3L	2493499	2494068	2493650	14.8061	FBgn0035347	CG33232
chr3L	9687428	9687872	9687631	46.059	FBgn0036030	CG6767
chr3L	9689568	9690288	9690029	38.0286	FBgn0036030	CG6767
chr3L	9688438	9688707	9688565	17.5367	FBgn0036030	CG6767
chr3L	16799408	16799956	16799736	23.5225	FBgn0036663	CG9674
chr3L	17003095	17003715	17003248	18.4655	FBgn0036684	CG3764
chr3L	17000361	17000564	17000420	14.1578	FBgn0036684	CG3764
chr3L	16993390	16993684	16993508	12.596	FBgn0036684	CG3764
chr3L	18882456	18882640	18882524	20.4918	FBgn0036821	CG3961
chr3L	18881210	18881511	18881368	13.1788	FBgn0036821	CG3961
chr3L	19074456	19074784	19074639	43.6365	FBgn0036844	Mkp3
chr3L	19079330	19079941	19079558	31.9046	FBgn0036844	Mkp3
chr3L	19072918	19073201	19073020	20.7997	FBgn0036844	Mkp3
chr3L	22830855	22831106	22830956	31.0485	FBgn0037195	CG11226
chr3L	22902276	22902987	22902605	35.9189	FBgn0037206	CG12768
chr3L	22941017	22942068	22941559	35.4817	FBgn0037207	Mes2
chr3R	3852795	3853002	3852897	19.1166	FBgn0037541	CG2747
chr3R	4878720	4879029	4878849	66.9898	FBgn0037659	Kdm2
chr3R	4880021	4881345	4880392	18.2171	FBgn0037659	Kdm2
chr3R	6712714	6712946	6712826	33.3477	FBgn0037856	CG4674
chr3R	7392590	7393027	7392770	28.4143	FBgn0037912	sea
chr3R	7387881	7388711	7388572	17.9395	FBgn0037912	sea
chr3R	7392590	7393027	7392770	28.4143	FBgn0037913	fabp
chr3R	7387881	7388711	7388572	17.9395	FBgn0037913	fabp
chr3R	7713252	7713652	7713423	26.6951	FBgn0037960	mthl5
chr3R	9881687	9882058	9881862	26.5083	FBgn0038197	foxo
chr3R	9882550	9882736	9882567	9.97441	FBgn0038197	foxo
chr3R	10549424	10550086	10549588	22.1134	FBgn0038256	CG7530
chr3R	10556515	10556682	10556599	14.1536	FBgn0038256	CG7530
chr3R	14411170	14411592	14411321	30.6262	FBgn0038627	CG7694
chr3R	16400291	16400689	16400446	11.0518	FBgn0038803	CG5191
chr3R	16603946	16604784	16604365	67.6106	FBgn0038826	CG17838
chr3R	16591362	16591924	16591473	28.311	FBgn0038826	CG17838
chr3R	16607456	16607985	16607704	12.6097	FBgn0038826	CG17838
chr3R	18999242	18999867	18999641	34.2943	FBgn0039061	Ir
chr3R	20398119	20398826	20398546	57.556	FBgn0039209	CG13624
chr3R	20407577	20407951	20407746	28.4825	FBgn0039209	CG13624
chr3R	20394270	20394564	20394399	17.4487	FBgn0039209	CG13624
chr3R	20407577	20407951	20407746	28.4825	FBgn0039210	CG13625
chr3R	22054989	22055441	22055281	13.6204	FBgn0039419	CG12290
chr3R	12068037	12068701	12068330	88.1926	FBgn0040071	tara
chr3R	12050282	12050684	12050456	83.7657	FBgn0040071	tara
chr3R	12075236	12076663	12075977	76.6209	FBgn0040071	tara
chr3R	12066220	12067447	12067016	68.1881	FBgn0040071	tara
chr3R	12080809	12081033	12080909	27.9706	FBgn0040071	tara
chr3R	12070337	12070786	12070546	18.9247	FBgn0040071	tara
chr3R	12054882	12055129	12055010	13.6328	FBgn0040071	tara
chr3R	20596773	20597110	20596989	18.1702	FBgn0040600	CG13631
chr2R	6982102	6982382	6982277	21.6251	FBgn0040765	luna
chr2L	9175183	9175523	9175356	34.964	FBgn0041092	tai
chr2L	9237652	9237982	9237796	20.8203	FBgn0041092	tai
chr2L	9203362	9203843	9203607	20.0877	FBgn0041092	tai
chr2L	19423403	19423764	19423547	36.6217	FBgn0041789	Pax
chr3R	6712714	6712946	6712826	33.3477	FBgn0042094	Adk3
chrX	16041605	16042250	16041877	36.0701	FBgn0042650	disco-r
chr2R	7553842	7554451	7554267	60.123	FBgn0044020	Roc2
chr2R	7545254	7545750	7545591	23.7966	FBgn0044020	Roc2
chr2R	7553842	7554451	7554267	60.123	FBgn0050035	Tret1-1
chr2R	12987576	12987748	12987625	10.6173	FBgn0050456	CG30456
chr3R	8327887	8328293	8328161	40.2819	FBgn0051354	Hsp70Bbb
chr3R	7713252	7713652	7713423	26.6951	FBgn0051368	CG31368
chr3L	19890570	19890783	19890679	21.4617	FBgn0052218	CR32218
chr3L	7798400	7798919	7798568	24.5	FBgn0052369	CG32369
chr3L	5270203	5270425	5270316	35.9408	FBgn0052423	shep
chr3L	5270881	5271432	5271011	14.981	FBgn0052423	shep
chr3L	5176045	5176438	5176280	9.79	FBgn0052423	shep
chr3L	5165393	5165618	5165529	7.3456	FBgn0052423	shep
chr3L	880902	881346	881090	47.2574	FBgn0052479	CG32479
chrX	20939262	20939584	20939369	22.5966	FBgn0052512	CG32512
chrX	14917884	14918075	14917962	19.8846	FBgn0052594	be
chrX	4319034	4319427	4319190	25.6983	FBgn0052773	CG32773
chrX	4305447	4305778	4305617	22.5589	FBgn0052773	CG32773
chr2R	8879191	8879668	8879348	42.0562	FBgn0053798	CG33798
chr2L	21438115	21438262	21438192	10.827	FBgn0053810	His1:CG33810
chr2L	21438115	21438262	21438192	10.827	FBgn0053811	His-Psi:CR33811
chr2L	21438115	21438262	21438192	10.827	FBgn0053812	His3:CG33812
chr2L	21438115	21438262	21438192	10.827	FBgn0053903	His4:CG33903
chr2L	21438115	21438262	21438192	10.827	FBgn0053904	His2B:CG33904
chr2R	7271587	7271865	7271696	23.8845	FBgn0082585	sprt
chr2L	2197547	2197843	2197663	10.9145	FBgn0085201	CG34172
chr2R	10210034	10210201	10210116	12.5187	FBgn0085408	Shroom
chr2L	12617996	12618328	12618201	49.0609	FBgn0085424	nub
chr3L	17996303	17996608	17996448	12.2082	FBgn0086081	snoRNA:Me28S-A30
chr3R	9190548	9190967	9190725	26.1144	FBgn0086371	poly
chr3R	4485079	4485412	4485284	15.5071	FBgn0086679	p
chr2L	1667553	1667831	1667640	15.1086	FBgn0086758	chinmo
chr2L	1668419	1668998	1668707	7.17571	FBgn0086758	chinmo
chrX	3673765	3674434	3673925	77.2837	FBgn0086899	tlk
chrX	3638460	3639035	3638648	73.8587	FBgn0086899	tlk
chrX	3669863	3671724	3671421	64.0539	FBgn0086899	tlk
chrX	3642848	3643172	3642989	62.5145	FBgn0086899	tlk
chrX	3673184	3673582	3673327	61.9766	FBgn0086899	tlk
chrX	3666544	3668532	3667322	60.6842	FBgn0086899	tlk
chrX	3612638	3613050	3612833	44.4819	FBgn0086899	tlk
chrX	3614462	3614657	3614547	22.9366	FBgn0086899	tlk
chr2L	246597	247103	246752	30.16	FBgn0086902	kis
chr2L	223862	224692	224025	22.9689	FBgn0086902	kis
chr2L	248114	249586	249307	22.5427	FBgn0086902	kis
chr2L	220480	220722	220607	21.4801	FBgn0086902	kis
chr3R	3939812	3940097	3939922	20.1418	FBgn0243512	puc
chr3R	3931626	3932235	3931939	19.9167	FBgn0243512	puc
chr3R	3938507	3938930	3938637	18.4603	FBgn0243512	puc
chr2L	12482847	12483348	12483141	52.8525	FBgn0259176	bun
chr2L	12543079	12543566	12543342	47.2609	FBgn0259176	bun
chr2L	12545761	12546235	12545896	42.4274	FBgn0259176	bun
chr2L	12507603	12507967	12507726	27.2263	FBgn0259176	bun
chr2L	1220242	1220558	1220405	17.0836	FBgn0259229	CG42329
chrX	8923958	8924250	8924101	27.8194	FBgn0259734	CG42388
chr2L	16637298	16637683	16637414	18.6861	FBgn0259735	CG42389
chr2L	16544838	16544982	16544885	16.608	FBgn0259735	CG42389
chr3R	6213513	6214102	6213877	68.5002	FBgn0259938	cwo
chr3R	6216655	6216999	6216775	18.1101	FBgn0259938	cwo
chr2L	13571880	13572176	13572031	12.7226	FBgn0259984	kuz
chr3R	15394597	15394971	15394747	13.8105	FBgn0260003	Dys
chr3L	14750127	14751463	14750484	63.0232	FBgn0260233	CG42507
chr3L	16039784	16040101	16039982	16.9913	FBgn0260635	th
chr3R	7808168	7808629	7808437	22.373	FBgn0260745	mfas
chr2R	18480406	18480603	18480503	39.5437	FBgn0260866	dnr1
chr2R	15350805	15351275	15350970	18.2706	FBgn0260934	par-1
chr2R	15344227	15344819	15344595	14.9727	FBgn0260934	par-1
chr3L	12797542	12797723	12797604	15.2628	FBgn0260945	Atg1
chrX	7838886	7839283	7839154	12.3479	FBgn0260970	CG42593
chr3R	14748781	14749249	14749095	14.3005	FBgn0261113	Xrp1
chr3R	14749528	14749693	14749642	12.6907	FBgn0261113	Xrp1
chr3R	2935474	2935627	2935524	20.6126	FBgn0261238	Alh
chr2L	21237702	21238006	21237821	31.842	FBgn0261239	Hr39
chrX	5639576	5639905	5639701	14.1634	FBgn0261383	IntS6
chrX	19055863	19056099	19055976	8.33337	FBgn0261461	RhoGAP18B
chr3R	16135096	16135331	16135170	14.7331	FBgn0261550	CG42668
chr3R	16143167	16143447	16143278	9.68057	FBgn0261550	CG42668
chr3R	5262046	5262696	5262450	69.3522	FBgn0261552	ps
chr3R	5244929	5245256	5245138	54.9308	FBgn0261552	ps
chr3R	5254782	5255160	5254996	11.0366	FBgn0261552	ps
chr3R	24151913	24152716	24152093	30.8974	FBgn0261618	larp
chr2R	13149351	13149519	13149449	11.7692	FBgn0261642	mbl
chr2L	12545761	12546235	12545896	42.4274	FBgn0261709	CR42746
chrX	8304406	8305078	8304602	60.6554	FBgn0261793	Trf2
chr2L	5145904	5146196	5145975	37.6627	FBgn0261836	Msp-300
chr3R	10954282	10954596	10954410	12.7973	FBgn0261859	CG42788
chr3R	13525763	13527684	13526715	74.9692	FBgn0261885	osa
chr3R	13532263	13532891	13532412	23.9812	FBgn0261885	osa
chr2R	6317422	6318356	6318091	28.0371	FBgn0262114	RanBPM
chr3R	10539998	10540347	10540196	25.4989	FBgn0262127	kibra
chr3R	10549424	10550086	10549588	22.1134	FBgn0262127	kibra
chr3L	19890570	19890783	19890679	21.4617	FBgn0262519	Mi-2
chr3L	19896537	19896744	19896623	11.2479	FBgn0262519	Mi-2
chr3L	8073943	8074199	8074068	17.4066	FBgn0262579	Ect4
chr3R	16079485	16079926	16079707	31.0874	FBgn0262582	cic
chr3R	16078897	16079239	16079125	21.6622	FBgn0262582	cic
chr3L	15101146	15101885	15101300	49.6368	FBgn0262707	CTPsyn
chr3L	15100517	15100933	15100703	36.7228	FBgn0262707	CTPsyn
chrX	10708237	10708498	10708352	35.3787	FBgn0262735	Imp
chrX	10700716	10701145	10700958	33.2926	FBgn0262735	Imp
chrX	10695153	10695540	10695296	14.7974	FBgn0262735	Imp
chr2R	2518975	2519197	2519068	31.2817	FBgn0262736	Vha16-1
chr2R	2515766	2515923	2515827	21.6227	FBgn0262736	Vha16-1
chr2R	2517970	2518158	2518036	10.0656	FBgn0262736	Vha16-1
chr3L	21873374	21873894	21873716	24.0979	FBgn0262737	mub
chrX	7598271	7601522	7599328	64.3173	FBgn0262979	CG43287
chr3L	627814	629315	628165	78.6919	FBgn0263039	CR43334
chr3L	640380	640789	640547	60.4154	FBgn0263039	CR43334
chr3R	5700235	5700419	5700341	28.401	FBgn0263097	Glut4EF
chr2R	6504940	6505269	6505073	35.0281	FBgn0263102	psq
chr2R	6489362	6489681	6489476	27.7878	FBgn0263102	psq
chr2R	6453920	6454754	6454118	24.0227	FBgn0263102	psq
chr2R	6446371	6446581	6446455	18.9349	FBgn0263102	psq
chrX	13782850	13783166	13783011	15.1284	FBgn0263115	mamo
chr2R	4553336	4553846	4553591	14.2432	FBgn0263120	Acsl
chr3R	4485079	4485412	4485284	15.5071	FBgn0263231	bel
chr3L	3246314	3246858	3246655	64.544	FBgn0263246	CG43389
chr3R	7392590	7393027	7392770	28.4143	FBgn0263316	Mrp4
chr3L	2817994	2818298	2818116	37.1666	FBgn0263392	CG43444
chr3L	2823285	2824147	2823701	35.679	FBgn0263392	CG43444
chr3L	2867169	2867910	2867731	28.7009	FBgn0263392	CG43444
chrX	5455768	5456097	5455891	22.5345	FBgn0263512	Vsx2
chrX	3673184	3673582	3673327	61.9766	FBgn0263532	mir-4962
chr3R	12708185	12708515	12708332	18.3791	FBgn0263610	msa
chr3R	12724768	12725061	12724924	15.4851	FBgn0263610	msa
chr3R	21846340	21846917	21846739	51.1962	FBgn0263653	CR43644
chr3R	5176421	5176787	5176544	12.1184	FBgn0263749	CG43674
chrX	12629882	12630443	12629996	27.6883	FBgn0263865	Smr
chr3R	10564348	10565442	10564996	17.8146	FBgn0263929	jvl
chr3L	8818970	8819388	8819183	17.9518	FBgn0263930	dally
chr3R	24672679	24672884	24672774	12.855	FBgn0264324	spg
chr3R	16978619	16979032	16978697	18.2968	FBgn0264357	SNF4Agamma
chrX	8923958	8924250	8924101	27.8194	FBgn0264384	CR43836
chr3R	9808963	9809743	9809584	27.7038	FBgn0264493	rdx
chr2L	1734346	1734622	1734480	13.6985	FBgn0264494	CG17646
chr2R	8146689	8146990	8146861	18.9837	FBgn0264501	CR43900
chrX	1835816	1835969	1835882	20.4186	FBgn0264562	Hr4
chrX	1858081	1858425	1858195	14.4415	FBgn0264562	Hr4
chr3L	15100517	15100933	15100703	36.7228	FBgn0264702	CR43971
chr3L	8073943	8074199	8074068	17.4066	FBgn0264705	CR43974

## Sheet: Column Legends
Chromosome	Chromosome number and arm
Peak_Start	Starting genomic coordinate of peak
Peak_End	Ending genomic coordinate of peak
Peak_Summit	Genomic coordinate of peak summit
Avg_-log(pvalue)	Average of -log(p-value) of peaks as defined by MACS2
FBGN	Flybase gene number of nearby gene
Gene_Name	Name of nearby gene
