# Supplementary material for: Atrophin controls developmental signaling pathways via interactions with Trithorax-like
Source: eLife journal article supplement (doi:10.7554/elife.23084), 2017-03-22
Supplement: supp [file elife-23084-supp-v1.zip › elife_poa_e23084_Supplementary_File_2.xlsx]

## Sheet: Sheet1
Supp Table S2	List of used primer sequences
Experiment	Primer sequence (5' to 3')
tkv probe (sense)	GCAACGATTTAGGTGACACTATAGAAATGGCGCCGAAATCCAGAAAGAAG
tkv probe (anti-sense)	GCAACGAATTAACCCTCACTAAAGGGTTAGACAATCTTAATGGGCACATCGATTAG
fng probe (sense)	GCAACGATTTAGGTGACACTATAGAAATGATGAGCCTGACTGTGCTCTCG
fng probe (anti-sense)	GCAACGAATTAACCCTCACTAAAGGGTCATCTGGGCGGGCAGAAGC
sbb locus negative control	CTGCGCCGGATAGAACTGAT
	ATTGATGGGCAAGAAGCCGA
Atro only peak at sbb locus	CGAAAGGGACGGACAGCTTA
	AAACGGCTTGGTTTTGCCTG
Atro Trl peak at sbb locus	GAAGAGGAAAGAGCCGGAGAG
	CAGTTGCCACTCGCGTTTTC
kayak	CGCTTGGTAGTATGCAATGG
	AGTAGCTGCATTACTACCGT
negative control for kayak	TGTTAATGGGCGGTGGTGACCTTA
	TGCGGGTCTCTCGATTGTTGTCAT
Trl peak	CGCGCCTGTATCTGTGTATCTATG
	GTCTTGCTCTCCTCTCCATCCTAA
negative control for Trl peak	CCTATGATCTGATGGCCCTGC
	CAACAACGAGTGCTCAAGCG
noc peak	CCCAAAGCAGCCACAACAAC
	GCAATGGAAGCCAAGACAGGTTT
negative control for noc peak	TGCAAAGGCTGACACATCTCTG
	CGATGATAGAAGAGAGTGATCCTGC
Atro dsRNA	CCGCGAAATTAATACGACTCACTATAGGGAGACTACGATCCAGGCAAAGCTC
	CCGCGAAATTAATACGACTCACTATAGGGAGACTGGTGCTGCTGTTGTTGTT
Trl dsRNA	GAATTAATACGACTCACTATAGGGATGGTTATGTTGGCTGGCGTCAA
	GAATTAATACGACTCACTATAGGGATCTTTACGCGTGGTTTGCGT
GFP dsRNA	GAATTAATACGACTCACTATAGGGAGAAGCCGCTACCCCGACCACATGA
	GAATTAATACGACTCACTATAGGGAGACTTGTACAGCTCGTCCATGCCG
