# Supplementary material for: Atrophin controls developmental signaling pathways via interactions with Trithorax-like
Source: eLife journal article supplement (doi:10.7554/elife.23084), 2017-03-22
Supplement: supp [file elife-23084-supp-v1.zip › elife_poa_e23084_Supplementary_File_3.docx]

**Sample size**

Main Figures

Figure 2

A: >10 different biological replicates of antennal discs were stained and analyzed. >10 clones were analyzed.

B, C: >10 different biological replicates of wing discs were stained and analyzed. >10 clones were analyzed.

Figure 3

B: 4 independent *in situ* hybridization experiments, each time involving ≥10 wing discs, were analyzed.

C-E: >10 different biological replicates of wing discs were stained and analyzed. >10 clones were analyzed.

Figure 4

C: >5 different biological replicates of wing discs were stained and analyzed. >10 clones were analyzed.

D, E: >10 different biological replicates of eye discs were stained and analyzed. >10 clones were analyzed.

Figure 6

D, F: 4 independent experiments were performed to generate and stain *TrlR85* clones each. ≥10 wing discs were stained each time

Figure Supplement

Figure 4 – Figure Supplement 1

A: >5 different biological replicates of wing discs were stained and analyzed. >10 clones were analyzed.

B: >10 different biological replicates of antennal discs were stained and analyzed. >10 clones were analyzed.

C: 4 independent in situ hybridization experiments, each time involving ≥10 wing discs, were analyzed.

Figure 4 – Figure Supplement 2

A-B: >5 different biological replicates of eye discs were stained and analyzed. >10 clones were analyzed.

Figure 4 – Figure Supplement 3

A-C: >10 different biological replicates of eye discs were stained and analyzed. >10 clones were analyzed.

Figure 6 – Figure Supplement 3

4 independent experiments were performed to generate and stain *TrlR85* clones each. ≥10 wing discs were stained each time.
