# Supplementary figures and images for: Atrophin controls developmental signaling pathways via interactions with Trithorax-like
Source: eLife journal article supplement (doi:10.7554/elife.23084), 2017-03-22

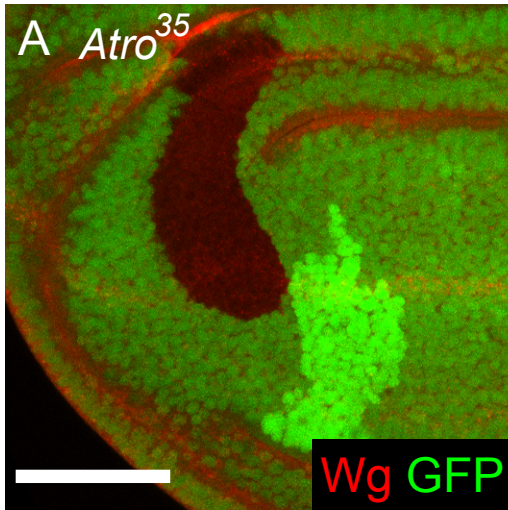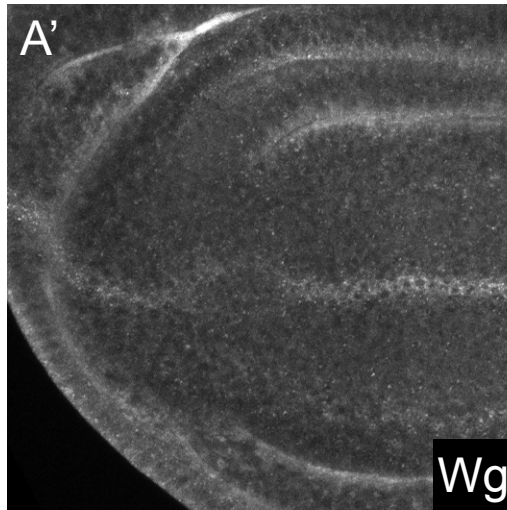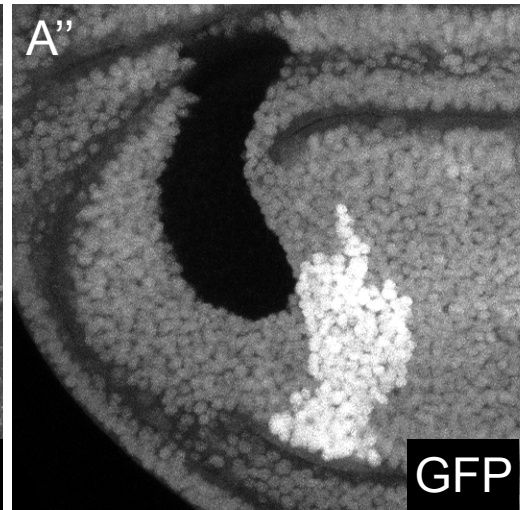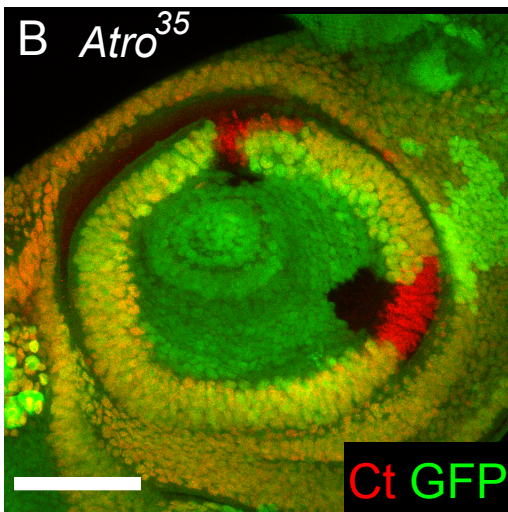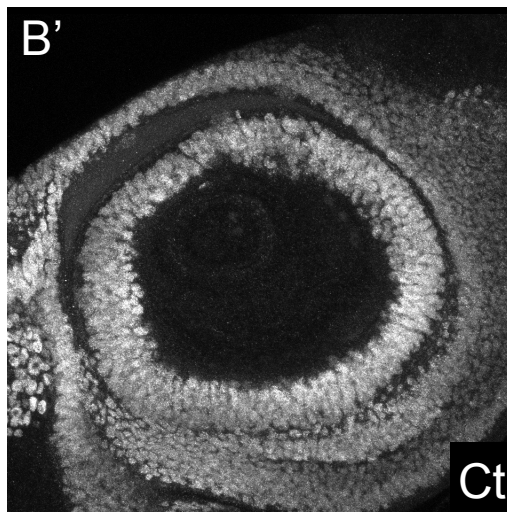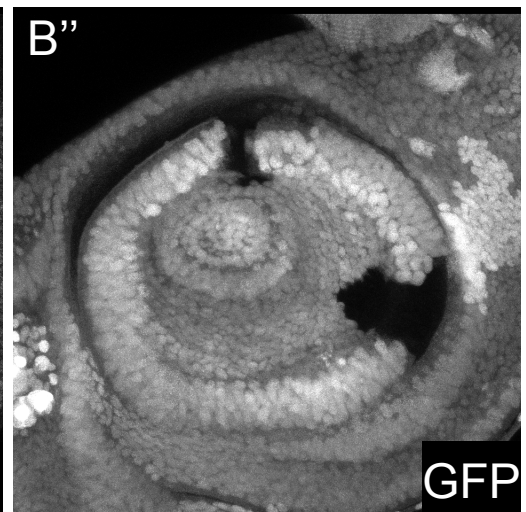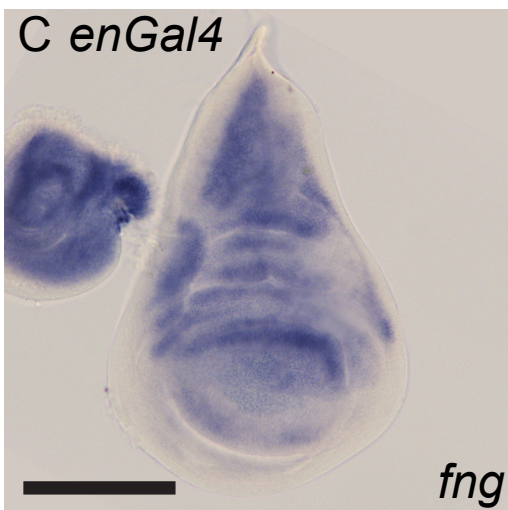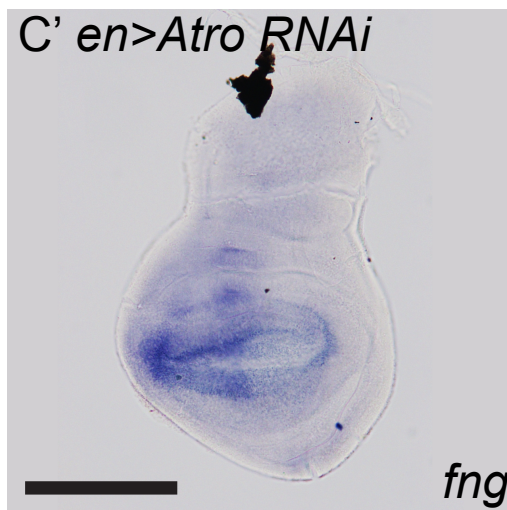

Supplement: supp [file elife-23084-supp-v1.zip]

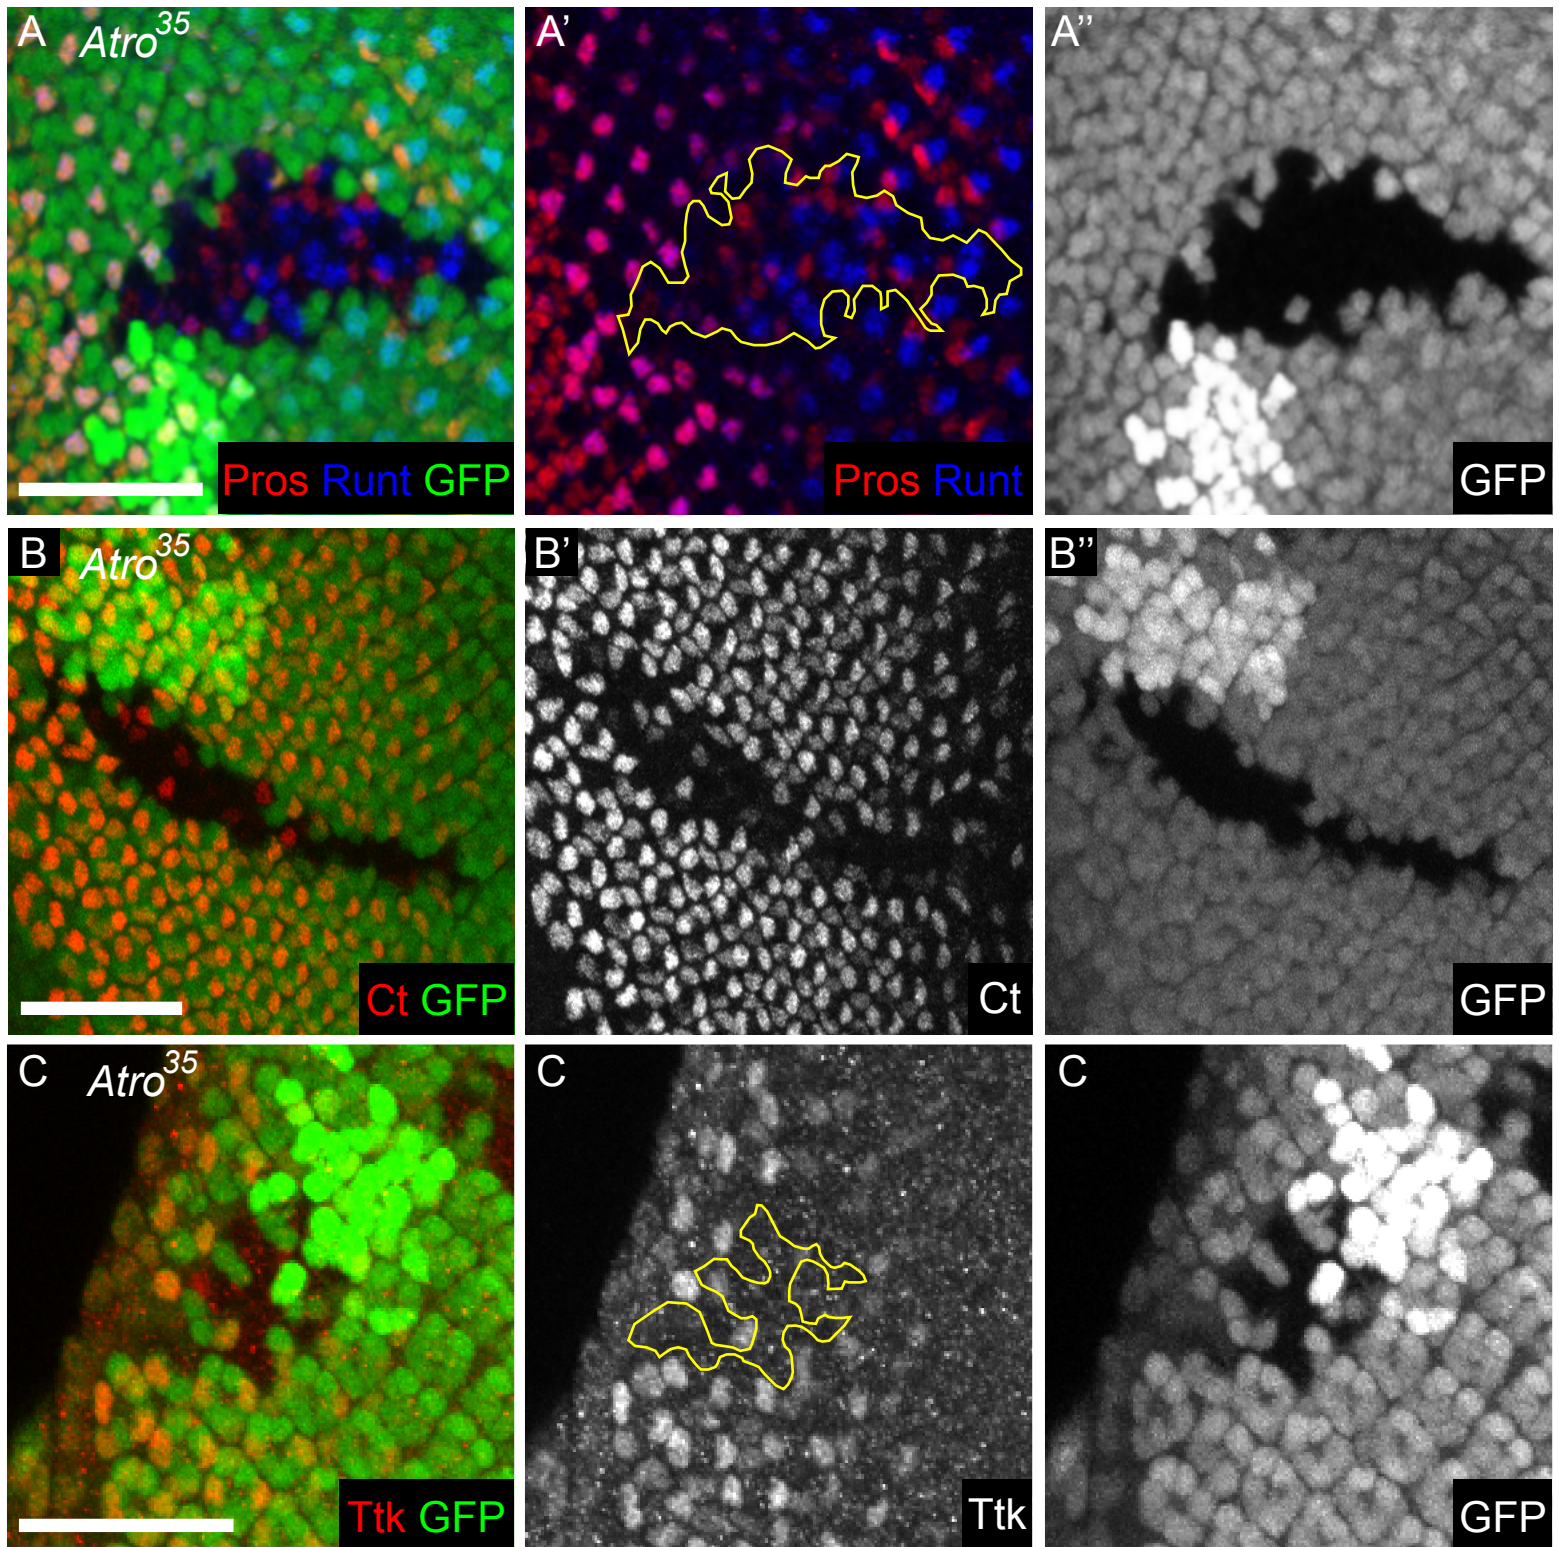

Supplement: supp [file elife-23084-supp-v1.zip]

A

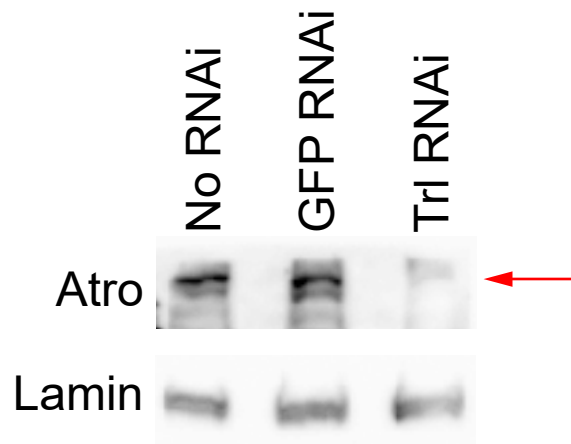

B

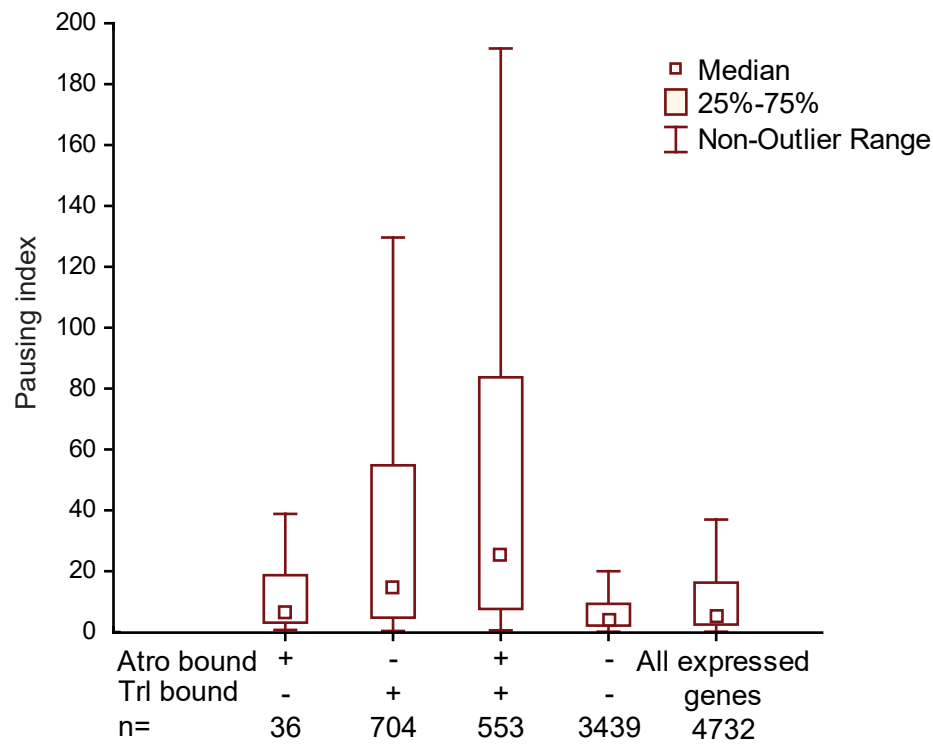

Supplement: supp [file elife-23084-supp-v1.zip]

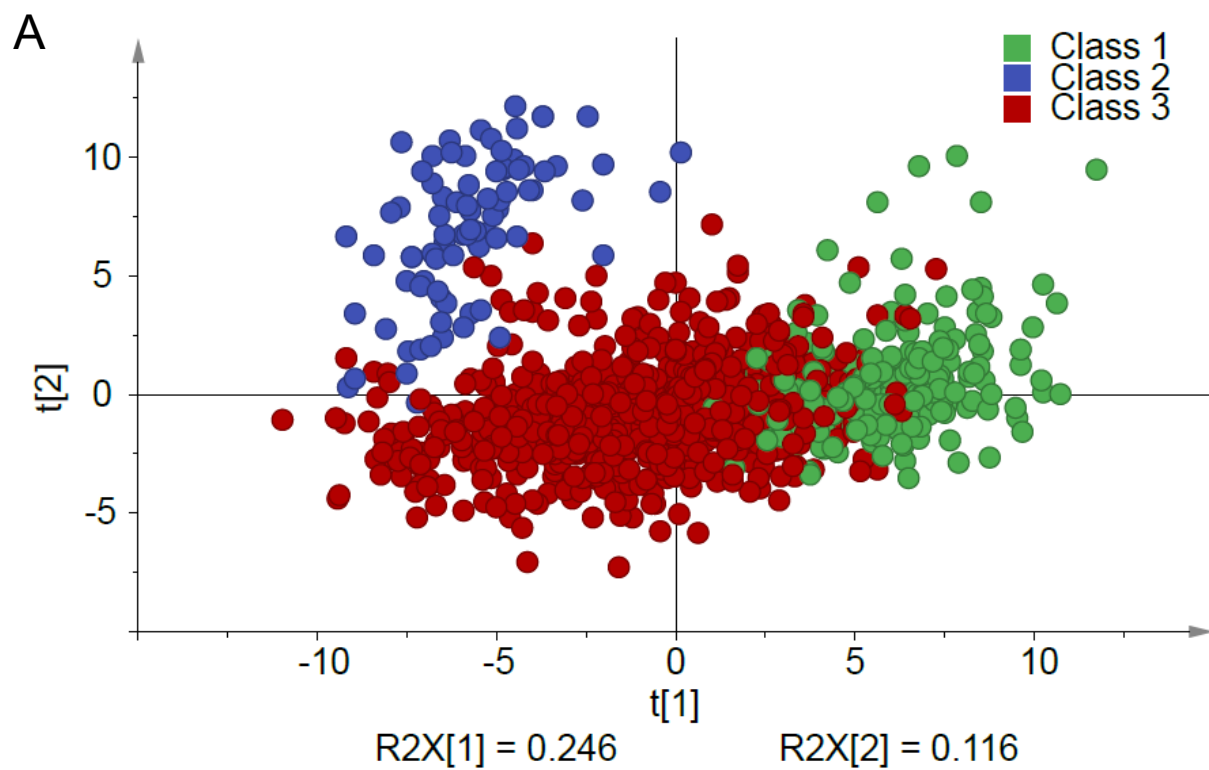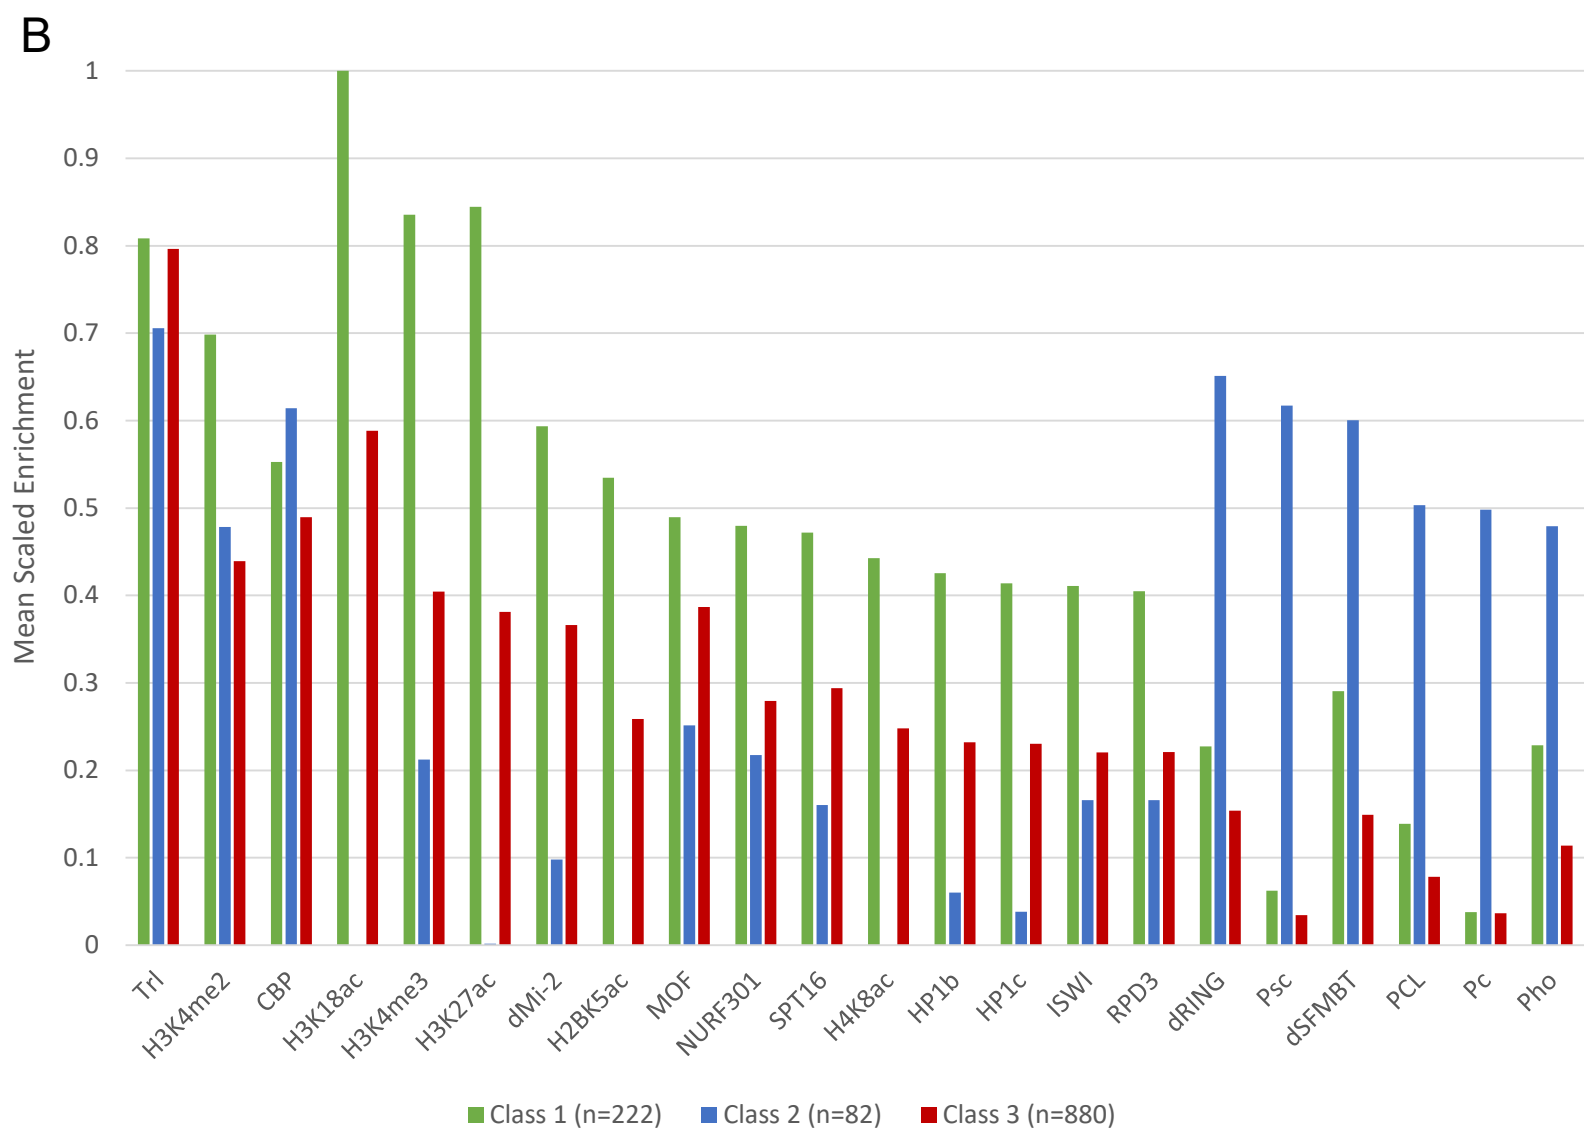

Supplement: supp [file elife-23084-supp-v1.zip]

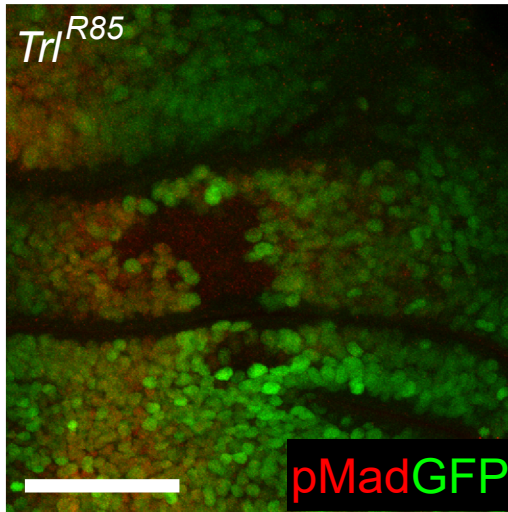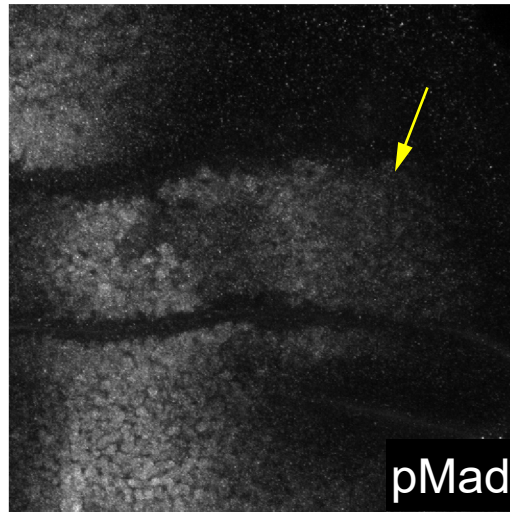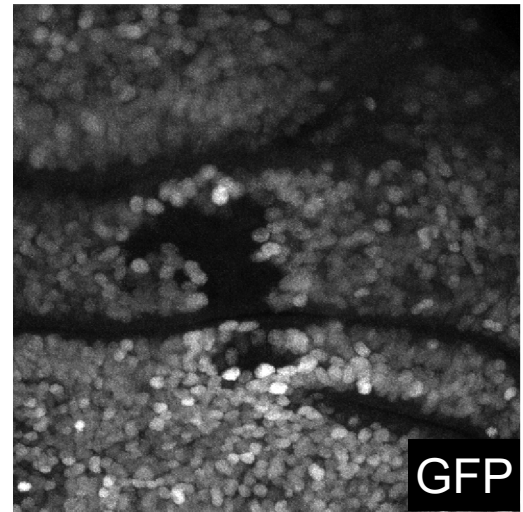

Supplement: supp [file elife-23084-supp-v1.zip]

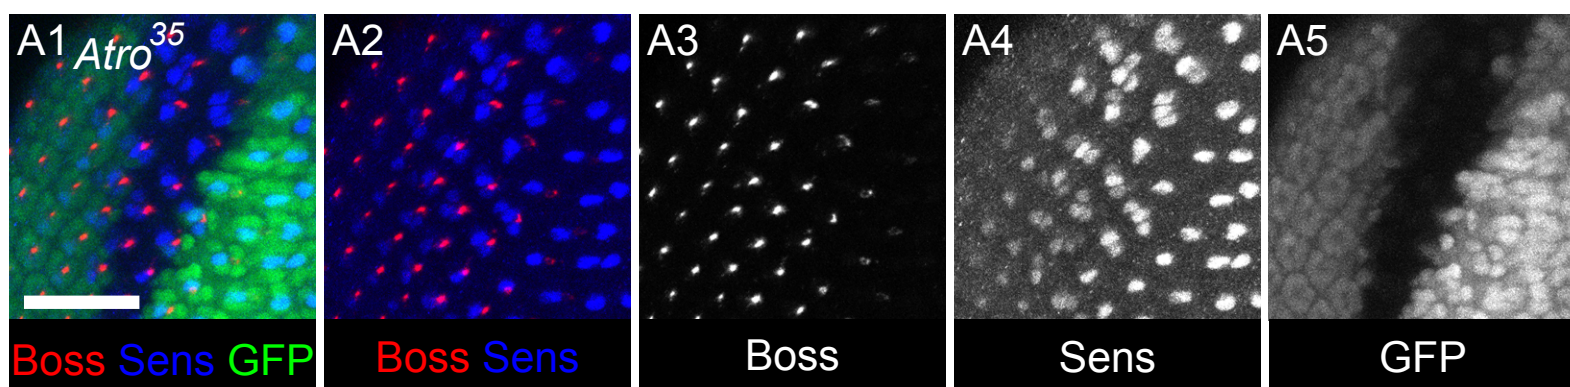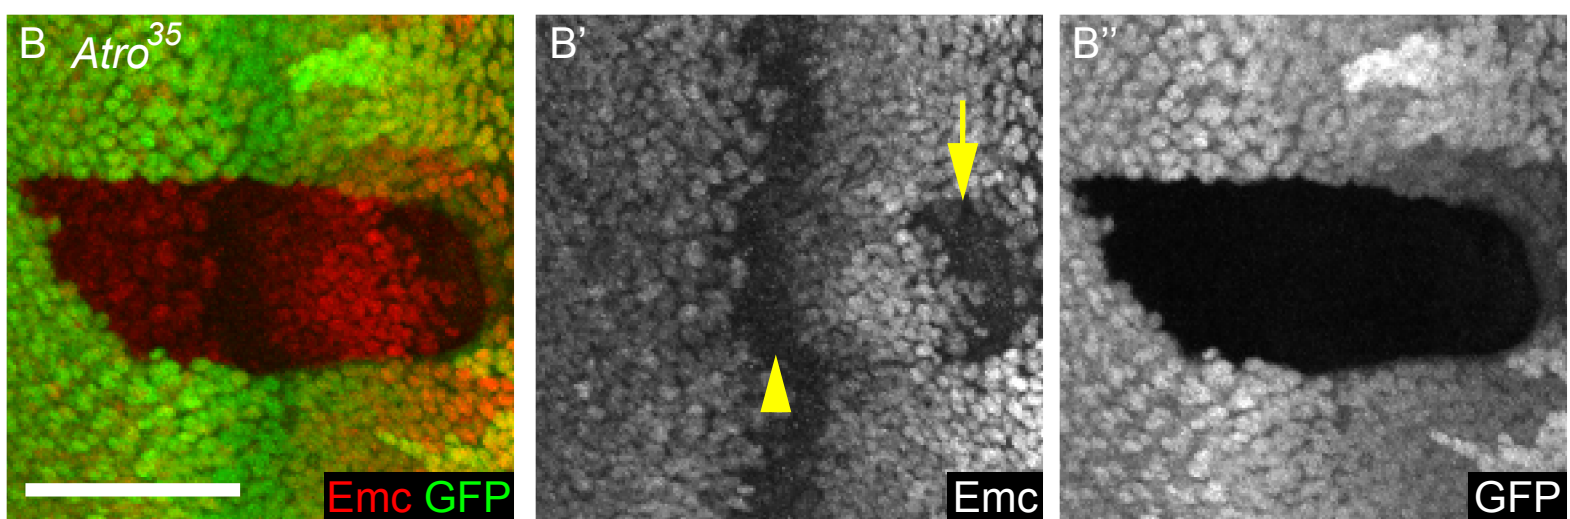

Supplement: supp [file elife-23084-supp-v1.zip]

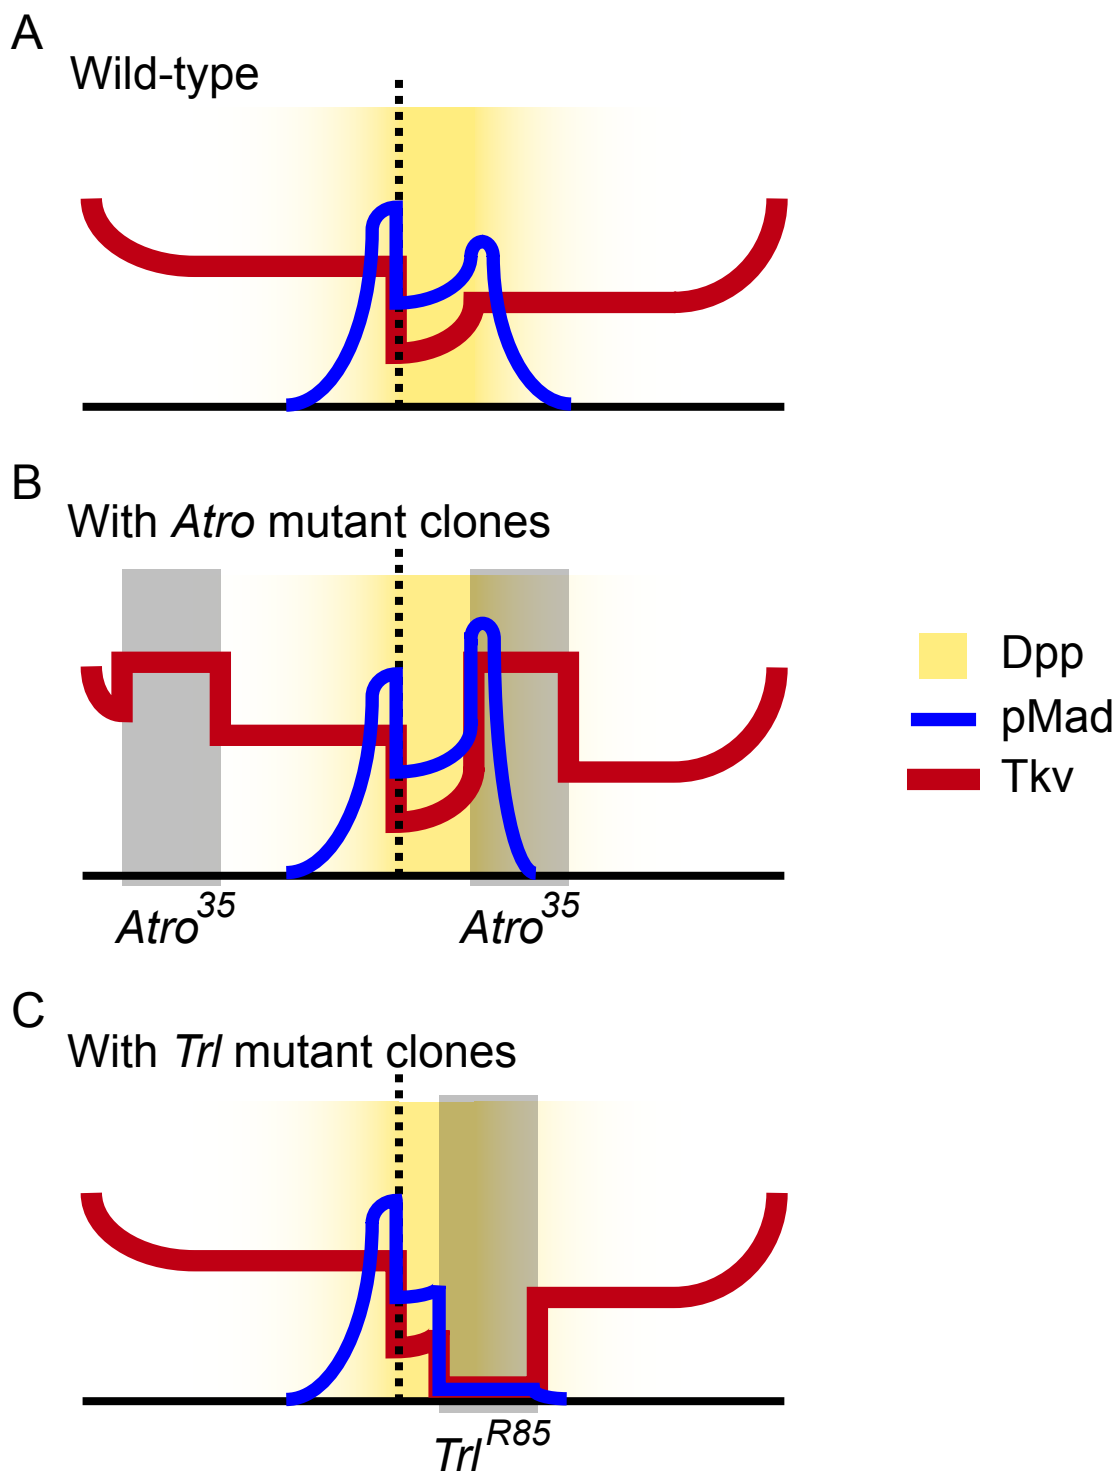

Supplement: supp [file elife-23084-supp-v1.zip]

A

## Atro Trl ChIP-re-ChIP qPCR Results

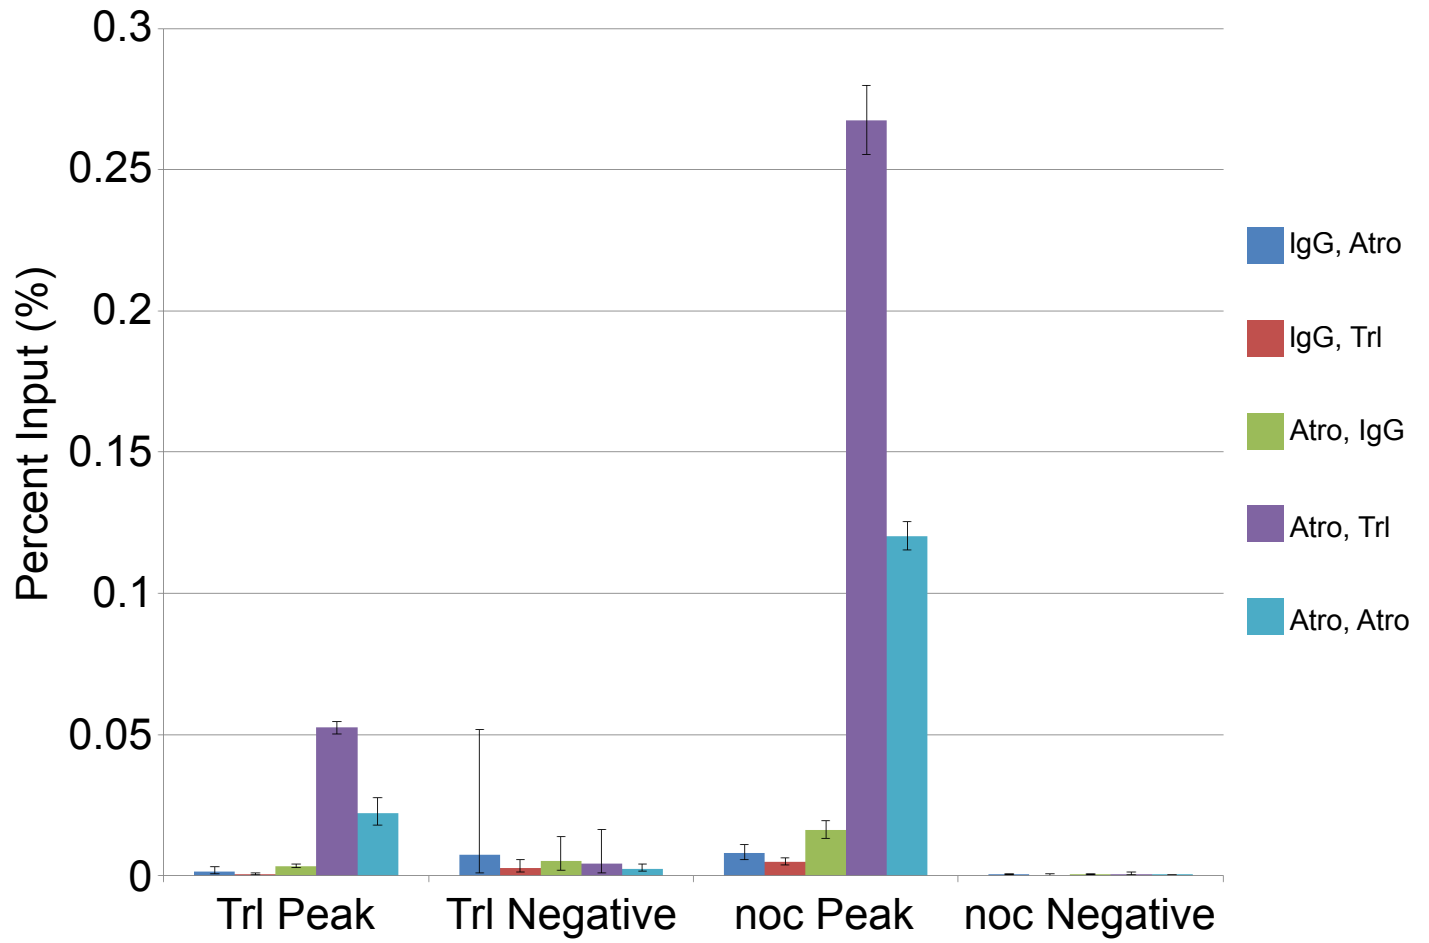

## B

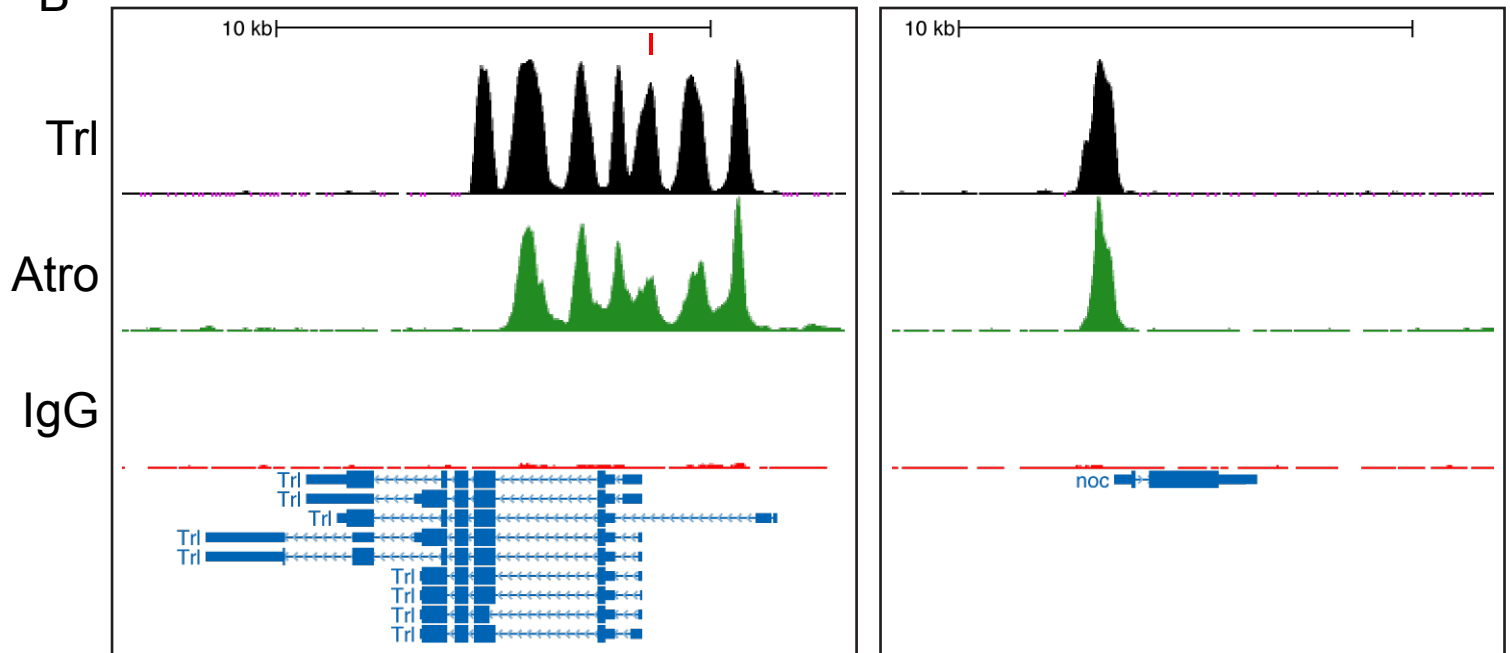

Supplement: supp [file elife-23084-supp-v1.zip › elife_poa_e23084_Figure_6_figure_supplement1.pdf]
